# Supplementary material for: Identical bacterial populations colonize premature infant gut, skin, and oral microbiomes and exhibit different in situ growth rates
Source: Genome Res. 2017 Apr;27(4):601–12. doi: 10.1101/gr.213256.116 (PMC5378178; doi:10.1101/gr.213256.116)
Supplement: Supplemental Material [file supp_gr.213256.116_Supplemental_Table_S1.xlsx]

## Sheet: Sheet1
Baby Number	Birth weight (grams)	Gestational Age	Pregnancy complications	Delivery Mode	Multiple Gestations	Antibiotics Given	Antibiotics with Admission	Feeding History
1	2847	28 4/7	PPROM; chorioamnionitis	Vaginal	No	Ampicillin Gentamycin	7days	Only formula fed; fortified to 24 calories/oz on DOL 9
2	734	25 2/7	GBS+; chorioamnionitis (GBS)	Vaginal	No	Ampicillin Gentamycin	7days	Formula fed until DOL 5 when breast milk was first received; breast milk fortified to 24 calories / oz on DOL 9, fortified to 26 calories / oz on DOL 21
