# Supplementary material for: Identical bacterial populations colonize premature infant gut, skin, and oral microbiomes and exhibit different in situ growth rates
Source: Genome Res. 2017 Apr;27(4):601–12. doi: 10.1101/gr.213256.116 (PMC5378178; doi:10.1101/gr.213256.116)
Supplement: Supplemental Material [file supp_gr.213256.116_Supplemental_Table_S2.xlsx]

## Sheet: Sheet2
Sample	Infant	DOL	Body_site	Original_Reads	Trimmed_HR_reads	HR_bases	Average Read Length	% Human	Diaper_or_fresh	Library_insert_size
0106W	1	6	Skin	32662774	3162990	498801458	157.699	0.903162	NA	600
0106Y	1	6	Mouth	29377958	18854982	2974838066	157.775	0.358193	NA	600
0110A	1	10	Gut	22172946	21570566	3081129996	142.84	0.0271673	D	600
0111A	1	11	Gut	21581520	19830084	2742514020	138.301	0.0811544	D	1000
0112A	1	12	Gut	26750636	26002826	3709382813	142.653	0.0279548	F	600
0113A	1	13	Gut	27287482	25603222	3576805360	139.701	0.0617228	F	1000
0114A	1	14	Gut	25533332	24904532	3570786169	143.379	0.0246266	F	600
0115A	1	15	Gut	21723650	20065878	2801935631	139.637	0.0763119	F	1000
0116A	1	16	Gut	30538856	29658366	4261881017	143.699	0.0288318	F	600
0117A	1	17	Gut	19124796	17215502	2386210433	138.608	0.0998334	F	1000
0118A	1	18	Gut	27118830	26421940	3822636492	144.677	0.0256976	F	600
0119A	1	19	Gut	24774686	22527932	3145672095	139.634	0.0906875	F	1000
0120A	1	20	Gut	30260198	26982868	3884169078	143.949	0.108305	F	600
0121A	1	21	Gut	20240678	18503840	2570888210	138.938	0.0858093	D	1000
0123A	1	23	Gut	22538650	21832690	3240003991	148.402	0.0313222	F	600
0123W	1	23	Skin	32194632	13539422	2136336634	157.786	0.579451	NA	600
0123Y	1	23	Mouth	32024752	10631256	1676146961	157.662	0.66803	NA	600
0124A	1	24	Gut	25617108	20675444	2986424464	144.443	0.192905	D	1000
0125A	1	25	Gut	25179886	23080640	3416919291	148.043	0.08337	D	600
0126A	1	26	Gut	29008662	23773198	3437842011	144.61	0.180479	F	1000
0127A	1	27	Gut	21388536	15377952	2279716180	148.246	0.281019	D	600
0505A	2	5	Gut	22979144	19148288	2856058082	149.155	0.16671	D	600
0506A	2	6	Gut	43448480	14466932	2138449572	147.816	0.667032	D	1000
0507A	2	7	Gut	15402546	13973462	2065017763	147.781	0.0927823	F	600
0508A	2	8	Gut	22616996	19691578	2846694847	144.564	0.129346	F	1000
0511A	2	11	Gut	21668034	21183404	3144610665	148.447	0.0223661	D	600
0512W	2	12	Skin	28592306	3162140	496955702	157.158	0.889406	NA	600
0514A	2	14	Gut	30725804	27123952	3932656819	144.988	0.117226	D	1000
0514Y	2	14	Mouth	34668714	11431114	1798497321	157.334	0.670276	NA	600
0515A	2	15	Gut	21570690	20944832	3103787286	148.189	0.0290143	F	600
0516A	2	16	Gut	20614364	17732658	2528029924	142.564	0.139791	D	1000
0517A	2	17	Gut	28910358	27617362	4049546788	146.63	0.0447243	F	600
0518A	2	18	Gut	27462788	25976044	3809718279	146.663	0.0541367	D	600
0519A	2	19	Gut	25898198	22511786	3233658584	143.643	0.130759	F	1000
0520A	2	20	Gut	26516542	24070426	3538490331	147.006	0.0922487	F	600
0521A	2	21	Gut	24294132	21741222	3141528240	144.496	0.105083	F	1000
0522A	2	22	Gut	28741000	27751348	4097679614	147.657	0.0344335	F	600
0522W	2	22	Skin	31279384	1583552	249097347	157.303	0.949374	NA	600
0523A	2	23	Gut	41218626	38737118	5680585937	146.645	0.0602036	D	1000
0524A	2	24	Gut	28338216	27410490	4039330544	147.364	0.0327376	D	600
0525A	2	25	Gut	29525594	27933696	4086168003	146.281	0.0539159	D	1000
0526A	2	26	Gut	46128072	44072098	6469387151	146.791	0.044571	D	600
0527A	2	27	Gut	22257160	19740014	2835512614	143.643	0.113094	F	1000
0528A	2	28	Gut	15391638	14423110	2134865034	148.017	0.0629256	D	600
0528Y	2	28	Mouth	33729424	1939900	302018575	155.688	0.942486	NA	600
