# Supplementary material for: Identical bacterial populations colonize premature infant gut, skin, and oral microbiomes and exhibit different in situ growth rates
Source: Genome Res. 2017 Apr;27(4):601–12. doi: 10.1101/gr.213256.116 (PMC5378178; doi:10.1101/gr.213256.116)
Supplement: Supplemental Material [file supp_gr.213256.116_Supplemental_Table_S4.xlsx]

## Sheet: Table5_colonizationTable
Infant	RefFrom	average_ANI	average_SNPs	bodysite	genome	minimum_coverage	minimum_unmasked_breadth	percent_colonized	samples
1	Skin	99.9701	1374	Skin	0123W_Corynebacterium_59_10	15.9883	0.901954	2.11581	['0123W']
1	Gut	99.9983	94.2857	Gut	0118A1023_Bacteroides_vulgatus-like_42_520	13.9297	0.974253	12.4631	['0124A', '0126A', '0119A', '0120A', '0121A', '0123A', '0116A', '0127A', '0118A', '0110A', '0117A', '0114A', '0115A', '0125A']
1	Gut	99.9999	3	Skin	0123A_Citrobacter_koseri_6	73.073	0.99037	63.6394	['0106W', '0123W']
1	Gut	99.9999	6.11765	Gut	0123A_Citrobacter_koseri_6	224.371	0.990378	78.3875	['0124A', '0126A', '0119A', '0120A', '0121A', '0123A', '0116A', '0112A', '0127A', '0118A', '0110A', '0117A', '0111A', '0114A', '0115A', '0113A', '0125A']
1	Gut	99.9999	5.5	Mouth	0123A_Citrobacter_koseri_6	311.905	0.990378	93.5092	['0106Y', '0123Y']
1	Skin	100	1	Skin	0123W_Corynebacterium_sp__HFH0082_59_121	189.59	0.99655	10.9114	['0123W']
1	Mouth	99.9998	4	Mouth	0123Y_Haemophilus_parainfluenzae_40_43	67.6069	0.994369	3.79836	['0123Y']
1	Gut	99.9997	15	Gut	0125A1030_Klebsiella_pneu_56_47	19.9658	0.995896	1.88612	['0126A', '0127A', '0125A']
1	Skin	99.9991	10	Skin	0123W_Corynebacterium_58_17	26.2004	0.98725	0.787201	['0123W']
1	Skin	99.9986	27	Skin	0123W_Streptococcus_mitis_40_11	18.3136	0.992836	0.860939	['0123W']
1	Gut	99.9992	26.3571	Gut	0113A1018_Enterococcus_faecalis_36_17	15.0605	0.991395	4.36946	['0124A', '0126A', '0119A', '0120A', '0121A', '0123A', '0116A', '0127A', '0118A', '0117A', '0114A', '0115A', '0113A', '0125A']
1	Gut	99.9986	54.25	Gut	0119A1024_Clostridium_difficile_29_11	8.8984	0.887239	0.814703	['0124A', '0119A', '0127A', '0113A']
1	Skin	99.8482	3540	Skin	0123W_Staphylococcus_epidermidis_32_35	24.743	0.970375	9.09334	['0106W', '0123W']
5	Mouth	99.999	19	Mouth	0528Y_Streptococcus_39_12	19.1039	0.987407	5.98087	['0528Y']
5	Gut	99.9998	7	Gut	0522A0213_Clostridium_perfringens_28_397	14.1781	0.957021	3.99885	['0524A', '0528A', '0523A', '0521A', '0522A', '0526A', '0525A', '0518A', '0527A']
5	Gut	99.9879	12	Skin	0527A0218_Serratia_marcescens_60_106	1.18946	0.0196378	1.20908	['0522W']
5	Gut	99.9994	17.5	Gut	0527A0218_Serratia_marcescens_60_106	6.85625	0.203018	2.9925	['0524A', '0528A', '0523A', '0521A', '0522A', '0519A', '0526A', '0525A', '0527A', '0520A']
5	Gut	99.9998	8	Mouth	0527A0218_Serratia_marcescens_60_106	7.08885	0.792498	5.93518	['0528Y']
5	Gut	99.9987	26	Gut	0506A0128_Streptococcus_agalactiae_35_952	915.529	0.994819	8.62783	['0505A', '0506A']
5	Gut	99.9997	7.18182	Gut	0520A0211_Propionibacterium_sp__HGH0353_63_15	18.732	0.994248	2.30499	['0524A', '0528A', '0517A', '0521A', '0522A', '0519A', '0526A', '0525A', '0518A', '0516A', '0527A']
5	Mouth	99.9807	136	Skin	0514Y_Staphylococcus_sp__M0480_31_3	4.67204	0.414348	1.661	['0522W']
5	Skin	99.9942	140	Skin	0522W_Corynebacterium_59_9	13.9127	0.94406	7.44912	['0522W']
5	Gut	99.9971	79	Skin	0525A0216_Klebsiella_pneumoniae_57_51	5.00209	0.510824	3.05214	['0512W']
5	Gut	99.9979	97.6667	Gut	0525A0216_Klebsiella_pneumoniae_57_51	14.3911	0.298387	8.81948	['0524A', '0514A', '0528A', '0523A', '0517A', '0521A', '0515A', '0522A', '0507A', '0508A', '0519A', '0526A', '0511A', '0525A', '0518A', '0516A', '0527A', '0520A']
5	Gut	99.998	106	Mouth	0525A0216_Klebsiella_pneumoniae_57_51	18.1636	0.992369	2.99125	['0514Y']
5	Gut	99.9989	26	Skin	0519A0210_Enterococcus_faecalis_37_406	7.81918	0.820154	4.71428	['0522W']
5	Gut	99.9978	52.2778	Gut	0519A0210_Enterococcus_faecalis_37_406	13.2815	0.634141	12.8896	['0524A', '0514A', '0528A', '0523A', '0517A', '0521A', '0515A', '0522A', '0519A', '0526A', '0511A', '0505A', '0525A', '0518A', '0506A', '0516A', '0527A', '0520A']
5	Mouth	99.9995	10	Mouth	0528Y_Rothia_mucilaginosa_59_11	16.4712	0.966739	6.2571	['0528Y']
5	Mouth	99.9998	9.5	Skin	0528Y_Escherichia_coli_51_14	11.9098	0.95695	36.1404	['0522W', '0512W']
5	Mouth	99.9998	10.6111	Gut	0528Y_Escherichia_coli_51_14	74.2593	0.995754	48.5759	['0524A', '0514A', '0528A', '0523A', '0517A', '0521A', '0515A', '0522A', '0507A', '0508A', '0519A', '0526A', '0511A', '0525A', '0518A', '0516A', '0527A', '0520A']
5	Mouth	99.9998	7.5	Mouth	0528Y_Escherichia_coli_51_14	21.9596	0.996146	43.9861	['0528Y', '0514Y']
5	Mouth	99.9963	53.5	Skin	0514Y_Staphylococcus_epidermidis_32_9	4.88583	0.482714	4.49127	['0522W', '0512W']
5	Mouth	99.9986	34	Mouth	0514Y_Staphylococcus_epidermidis_32_9	14.2626	0.983798	1.00485	['0514Y']
5	Mouth	99.9987	24	Mouth	0528Y_Streptococcus_mitis_40_11	17.6448	0.988778	5.66655	['0528Y']
5	Gut	99.9995	31	Skin	0511A0202_Pseudomonas_aeruginosa_66_19	6.19883	0.674777	25.7722	['0522W', '0512W']
5	Gut	99.9995	35	Gut	0511A0202_Pseudomonas_aeruginosa_66_19	15.9274	0.993446	0.959411	['0514A', '0515A', '0511A']
5	Gut	99.9992	57	Mouth	0511A0202_Pseudomonas_aeruginosa_66_19	81.4302	0.996693	15.5583	['0514Y']
1	NA	0.99958	1062.25	Skin	all_strains	15.9883	0.901954	86.9195	['0123W', '0106W']
5	NA	0.999955	52.8182	Skin	all_strains	1.18946	0.0196378	83.7895	['0522W', '0512W']
1	NA	0.999992	39.5192	Gut	all_strains	8.8984	0.887239	97.4025	['0124A', '0126A', '0119A', '0120A', '0121A', '0123A', '0116A', '0127A', '0118A', '0110A', '0117A', '0114A', '0115A', '0125A', '0112A', '0111A', '0113A']
5	NA	0.999989	37.7978	Gut	all_strains	6.85625	0.203018	88.8086	['0524A', '0528A', '0523A', '0521A', '0522A', '0526A', '0525A', '0518A', '0527A', '0519A', '0520A', '0505A', '0506A', '0517A', '0516A', '0514A', '0515A', '0507A', '0508A', '0511A']
1	NA	0.999999	5	Mouth	all_strains	67.6069	0.990378	97.3075	['0106Y', '0123Y']
5	NA	0.999992	30.3333	Mouth	all_strains	7.08885	0.792498	86.9531	['0528Y', '0514Y']

## Sheet: Inf1_min
genome	0106W	0106Y	0110A	0111A	0112A	0113A	0114A	0115A	0116A	0117A	0118A	0119A	0120A	0121A	0123A	0123W	0123Y	0124A	0125A	0126A	0127A
0113A1018_Enterococcus_faecalis_36_17	0.363969	0	0.2424	0.199765	0.290192	1.33672	1.90967	3.23963	10.0986	5.6066	3.93197	7.45511	2.96042	2.6916	6.29103	0.644074	0	10.5246	2.89464	8.4168	6.87353
0118A1023_Bacteroides_vulgatus-like_42_520	0	0	7.45419	0	0	0	8.80898	15.3505	9.94261	16.0564	42.5249	8.31652	23.2353	3.121	23.3254	0	0	5.88008	14.7138	14.7303	19.9925
0119A1024_Clostridium_difficile_29_11	0	0	0	0	0	1.77114	0.649088	0.623748	0.634891	0.979929	0.609547	1.42922	0.777623	0.84046	0.973308	0	0	1.3867	0.770079	0.930614	1.64136
0123A_Citrobacter_koseri_6	69.6779	98.7045	91.0209	98.8428	98.4872	95.9768	86.931	79.7544	77.9474	75.7059	50.0202	81.0094	70.6653	91.2368	67.2517	57.7431	88.5286	80.8133	72.666	70.5274	46.8738
0123W_Corynebacterium_58_17	0.136035	0	0	0	0	0	0	0	0	0	0	0	0	0	0	1.46915	0	0	0	0	0
0123W_Corynebacterium_59_10	0.454379	0	0	0	0	0	0	0	0	0	0	0	0	0	0	4.04491	0	0	0	0	0
0123W_Corynebacterium_sp__HFH0082_59_121	0.425742	0	0	0	0	0	0	0	0	0	0	0	0	0	0	21.4922	0	0	0	0	0
0123W_Dermabacter_63_3	0	0	0	0	0	0	0	0	0	0	0	0	0	0	0	0.243478	0	0	0	0	0
0123W_Staphylococcus_epidermidis_32_35	12.1276	0	0	0	0	0	0	0	0	0	0	0	0	0	0	6.32799	0	0	0	0	0
0123W_Streptococcus_mitis_40_11	0	0	0	0	0	0	0	0	0	0	0	0	0	0	0	1.73511	0.749257	0	0	0	0
0123Y_Haemophilus_parainfluenzae_40_43	0	0	0	0	0	0	0	0	0	0	0	0	0	0.150274	0	0.910361	7.62327	0	0	0	0
0125A1030_Klebsiella_pneu_56_47	0	0	0	0	0	0	0	0	0	0	0	0	0	0	0	0	0	0	6.3257	3.12225	22.4816

## Sheet: Inf5_min
genome	0505A	0506A	0507A	0508A	0511A	0512W	0514A	0514Y	0515A	0516A	0517A	0518A	0519A	0520A	0521A	0522A	0522W	0523A	0524A	0525A	0526A	0527A	0528A	0528Y
0506A0128_Streptococcus_agalactiae_35_952	86.3206	88.4158	0	0	0	0	0	0	0	0	0	0	0	0	0	0	0	0	0	0	0	0	0	0	n
0511A0202_Pseudomonas_aeruginosa_66_19	0	0	0.276572	0.545693	3.48409	34.6811	8.02022	31.0873	5.08577	0.308282	0.163939	0.243765	0	0	0	0.147483	17.0738	0	0	0	0.333114	0.195301	0	0.172778	y
0514Y_Staphylococcus_epidermidis_32_9	0	0.301735	0	0	0	2.42263	0	1.95274	0	0	0	0	0.140419	0	0	0	6.7411	0	0	0	0	0	0	0	y
0514Y_Staphylococcus_sp__M0480_31_3	0	0	0	0	0	0.146762	0	0.564561	0	0	0	0	0	0	0	0	3.51064	0	0	0	0	0	0	0	y
0519A0210_Enterococcus_faecalis_37_406	4.30789	1.89368	0	0	5.18795	0	1.76296	0.596581	1.87619	9.75299	18.4789	17.3571	35.5248	16.3448	8.27988	13.2381	9.5076	39.8198	20.5792	24.3449	23.0039	12.5429	8.08791	0.591508	y
0520A0211_Propionibacterium_sp__HGH0353_63_15	0	0	0	0	0	0	0.28957	0	0.288987	2.64971	1.95285	1.29525	1.91764	0.899094	2.00146	1.45646	0.363927	0	7.92732	5.59062	14.9105	2.42059	2.85025	0	y
0522A0213_Clostridium_perfringens_28_397	0	0	0	0	0	0	0	0	0	0.37827	0.179516	1.30647	0.623106	0.508172	1.56834	27.7473	0.221412	26.1467	9.06769	3.85029	1.35607	8.64737	3.5451	0	y
0522W_Corynebacterium_59_9	0	0	0	0	0	0.543844	0	0	0	0	0	0	0	0	0	0	14.6767	0	0	0	0	0	0	0	y
0525A0216_Klebsiella_pneumoniae_57_51	0	0	30.035	41.3596	21.6542	5.4098	4.61855	5.4274	5.62353	9.06279	7.9271	6.245	3.19381	2.86706	4.24808	3.36817	0.734624	1.60807	4.97564	6.24605	17.3349	9.94009	3.63541	0.596215	y
0527A0218_Serratia_marcescens_60_106	0	0	0	0	0	0	0	0	0	0	0	0	1.08366	1.71007	2.49177	15.7074	2.42131	9.03641	6.89822	6.73797	1.9737	16.3934	2.70994	11.9031	y
0528Y_Escherichia_coli_51_14	0	0.140807	18.4971	38.6243	65.0298	49.1025	80.7356	52.5405	82.0112	72.7498	65.7763	68.2961	51.8066	72.398	76.3824	34.374	23.8093	10.7976	45.7722	47.2175	36.1238	44.4801	74.0159	36.2033	y
0528Y_Rothia_mucilaginosa_59_11	0	0	0	0	0	0	0	0	0	0	0	0	0	0	0	0	0	0	0	0	0	0	0	12.5886	n
0528Y_Streptococcus_39_12	1.10594	1.08057	0	0	0	0	0	0	0	0	0	0	0	0	0	0	0	0	0	0	0	0	0	12.1341	n
0528Y_Streptococcus_mitis_40_11	0.416004	0.417278	0	0	0	0	0	0	0	0	0	0	0	0	0	0	0	0	0	0	0	0	0	11.4612	n
