# Supplementary material for: Identical bacterial populations colonize premature infant gut, skin, and oral microbiomes and exhibit different in situ growth rates
Source: Genome Res. 2017 Apr;27(4):601–12. doi: 10.1101/gr.213256.116 (PMC5378178; doi:10.1101/gr.213256.116)
Supplement: Supplemental Material [file supp_gr.213256.116_Supplemental_Table_S5.xlsx]

## Sheet: Arrays
unique_repeats	effective_spacers	spacers	super_spacers	organism
1	3	8	1	0113A1018_Enterococcus_faecalis_36_17.fna
1	0	17	0	0123W_Corynebacterium_59_10.fna
1	4	61	0	0123W_Corynebacterium_sp__HFH0082_59_121.fna
1	0	5	0	0123W_Staphylococcus_epidermidis_32_35.fna
1	0	11	0	0123W_Streptococcus_mitis_40_11.fna
1	0	9	0	0123Y_Haemophilus_parainfluenzae_40_43.fna
2	4	34	1	0511A0202_Pseudomonas_aeruginosa_66_19.fna
1	4	17	2	0519A0210_Enterococcus_faecalis_37_406.fna
2	0	7	0	0520A0211_Propionibacterium_sp__HGH0353_63_15
1	1	39	0	0522A0213_Clostridium_perfringens_28_397.fna
1	0	18	0	0522W_Corynebacterium_59_9.fna
4	0	67	0	0528Y_Rothia_mucilaginosa_59_11.fna

## Sheet: NICU_protospacers
From	Hit	Mismatches	Spacer	To	array_len	campaign	length	protospacer_bin	protospacer_infant	protospacer_project	protospacer_scaffold	repeat_sequence	spacer_BodySite	spacer_bin	spacer_infant	spacer_project	spacer_scaffold	spacer_sequence
5099	0123W_scaffold_82 read_length_100 length_41327 read_count_2821	1	JBBB003D_scaffold_60|CRISPR|1|spacer|3of4| id=27790514 [location: 52988..53017 of 111508; DR: GTTTTGGTACCATTCTAAACAACATGACTCTAAAAC]	5070	4	Inf_skin_oral	30		1	0123W	0123W_scaffold_82	GTTTTGGTACCATTCTAAACAACATGACTCTAAAAC	A	0519A0210_Enterococcus_faecalis_37_406	5	0519A0210	JBBB003D_scaffold_60	GGAGAAATGTAGCTGCTGTTTTGACATTAG
6489	JBBB002A_scaffold_86 read_length_150 length_42969 read_count_30501	1	JBBB003D_scaffold_60|CRISPR|1|spacer|3of4| id=27790514 [location: 52988..53017 of 111508; DR: GTTTTGGTACCATTCTAAACAACATGACTCTAAAAC]	6460	4	Inf_skin_oral	30		1	0123A1028	JBBB002A_scaffold_86	GTTTTGGTACCATTCTAAACAACATGACTCTAAAAC	A	0519A0210_Enterococcus_faecalis_37_406	5	0519A0210	JBBB003D_scaffold_60	GGAGAAATGTAGCTGCTGTTTTGACATTAG
36161	JBBB002B_scaffold_98 read_length_150 length_42649 read_count_47417	1	JBBB003D_scaffold_60|CRISPR|1|spacer|3of4| id=27790514 [location: 52988..53017 of 111508; DR: GTTTTGGTACCATTCTAAACAACATGACTCTAAAAC]	36190	4	Inf_skin_oral	30		1	0124A1029	JBBB002B_scaffold_98	GTTTTGGTACCATTCTAAACAACATGACTCTAAAAC	A	0519A0210_Enterococcus_faecalis_37_406	5	0519A0210	JBBB003D_scaffold_60	GGAGAAATGTAGCTGCTGTTTTGACATTAG
36162	JBBB002C_scaffold_126 read_length_150 length_42650 read_count_15705	1	JBBB003D_scaffold_60|CRISPR|1|spacer|3of4| id=27790514 [location: 52988..53017 of 111508; DR: GTTTTGGTACCATTCTAAACAACATGACTCTAAAAC]	36191	4	Inf_skin_oral	30		1	0125A1030	JBBB002C_scaffold_126	GTTTTGGTACCATTCTAAACAACATGACTCTAAAAC	A	0519A0210_Enterococcus_faecalis_37_406	5	0519A0210	JBBB003D_scaffold_60	GGAGAAATGTAGCTGCTGTTTTGACATTAG
36162	JBBB002D_scaffold_123 read_length_150 length_42650 read_count_46878	1	JBBB003D_scaffold_60|CRISPR|1|spacer|3of4| id=27790514 [location: 52988..53017 of 111508; DR: GTTTTGGTACCATTCTAAACAACATGACTCTAAAAC]	36191	4	Inf_skin_oral	30		1	0126A1031	JBBB002D_scaffold_123	GTTTTGGTACCATTCTAAACAACATGACTCTAAAAC	A	0519A0210_Enterococcus_faecalis_37_406	5	0519A0210	JBBB003D_scaffold_60	GGAGAAATGTAGCTGCTGTTTTGACATTAG
36483	JBBB002E_scaffold_135 read_length_150 length_42971 read_count_25431 read_length_150 length_42971 read_count_25431	1	JBBB003D_scaffold_60|CRISPR|1|spacer|3of4| id=27790514 [location: 52988..53017 of 111508; DR: GTTTTGGTACCATTCTAAACAACATGACTCTAAAAC]	36512	4	Inf_skin_oral	30		1	0127A1101	JBBB002E_scaffold_135	GTTTTGGTACCATTCTAAACAACATGACTCTAAAAC	A	0519A0210_Enterococcus_faecalis_37_406	5	0519A0210	JBBB003D_scaffold_60	GGAGAAATGTAGCTGCTGTTTTGACATTAG
1497	qb307082014_A_scaffold_154 length_4260 read_count_142	1	JBBB003D_scaffold_60|CRISPR|1|spacer|3of4| id=27790514 [location: 52988..53017 of 111508; DR: GTTTTGGTACCATTCTAAACAACATGACTCTAAAAC]	1526	4	Inf_skin_oral	30		1	0110A1015	qb307082014_A_scaffold_154	GTTTTGGTACCATTCTAAACAACATGACTCTAAAAC	A	0519A0210_Enterococcus_faecalis_37_406	5	0519A0210	JBBB003D_scaffold_60	GGAGAAATGTAGCTGCTGTTTTGACATTAG
1282	qb307082014_C_scaffold_44 length_4837 read_count_203	1	JBBB003D_scaffold_60|CRISPR|1|spacer|3of4| id=27790514 [location: 52988..53017 of 111508; DR: GTTTTGGTACCATTCTAAACAACATGACTCTAAAAC]	1311	4	Inf_skin_oral	30		1	0112A1017	qb307082014_C_scaffold_44	GTTTTGGTACCATTCTAAACAACATGACTCTAAAAC	A	0519A0210_Enterococcus_faecalis_37_406	5	0519A0210	JBBB003D_scaffold_60	GGAGAAATGTAGCTGCTGTTTTGACATTAG
36162	qb307082014_D_scaffold_71 length_42650 read_count_8132	1	JBBB003D_scaffold_60|CRISPR|1|spacer|3of4| id=27790514 [location: 52988..53017 of 111508; DR: GTTTTGGTACCATTCTAAACAACATGACTCTAAAAC]	36191	4	Inf_skin_oral	30	0113A1018_Enterococcus_faecalis_36_17	1	0113A1018	qb307082014_D_scaffold_71	GTTTTGGTACCATTCTAAACAACATGACTCTAAAAC	A	0519A0210_Enterococcus_faecalis_37_406	5	0519A0210	JBBB003D_scaffold_60	GGAGAAATGTAGCTGCTGTTTTGACATTAG
36162	qb307082014_E_scaffold_80 length_42650 read_count_9185	1	JBBB003D_scaffold_60|CRISPR|1|spacer|3of4| id=27790514 [location: 52988..53017 of 111508; DR: GTTTTGGTACCATTCTAAACAACATGACTCTAAAAC]	36191	4	Inf_skin_oral	30		1	0114A1019	qb307082014_E_scaffold_80	GTTTTGGTACCATTCTAAACAACATGACTCTAAAAC	A	0519A0210_Enterococcus_faecalis_37_406	5	0519A0210	JBBB003D_scaffold_60	GGAGAAATGTAGCTGCTGTTTTGACATTAG
6489	qb307082014_F_scaffold_74 length_42650 read_count_14663	1	JBBB003D_scaffold_60|CRISPR|1|spacer|3of4| id=27790514 [location: 52988..53017 of 111508; DR: GTTTTGGTACCATTCTAAACAACATGACTCTAAAAC]	6460	4	Inf_skin_oral	30		1	0115A1020	qb307082014_F_scaffold_74	GTTTTGGTACCATTCTAAACAACATGACTCTAAAAC	A	0519A0210_Enterococcus_faecalis_37_406	5	0519A0210	JBBB003D_scaffold_60	GGAGAAATGTAGCTGCTGTTTTGACATTAG
6489	qb307082014_G_scaffold_77 length_42956 read_count_62529	1	JBBB003D_scaffold_60|CRISPR|1|spacer|3of4| id=27790514 [location: 52988..53017 of 111508; DR: GTTTTGGTACCATTCTAAACAACATGACTCTAAAAC]	6460	4	Inf_skin_oral	30		1	0116A1021	qb307082014_G_scaffold_77	GTTTTGGTACCATTCTAAACAACATGACTCTAAAAC	A	0519A0210_Enterococcus_faecalis_37_406	5	0519A0210	JBBB003D_scaffold_60	GGAGAAATGTAGCTGCTGTTTTGACATTAG
6489	qb307082014_H_scaffold_76 length_42650 read_count_21127	1	JBBB003D_scaffold_60|CRISPR|1|spacer|3of4| id=27790514 [location: 52988..53017 of 111508; DR: GTTTTGGTACCATTCTAAACAACATGACTCTAAAAC]	6460	4	Inf_skin_oral	30		1	0117A1022	qb307082014_H_scaffold_76	GTTTTGGTACCATTCTAAACAACATGACTCTAAAAC	A	0519A0210_Enterococcus_faecalis_37_406	5	0519A0210	JBBB003D_scaffold_60	GGAGAAATGTAGCTGCTGTTTTGACATTAG
36161	qb307082014_I_scaffold_77 length_46341 read_count_28097	1	JBBB003D_scaffold_60|CRISPR|1|spacer|3of4| id=27790514 [location: 52988..53017 of 111508; DR: GTTTTGGTACCATTCTAAACAACATGACTCTAAAAC]	36190	4	Inf_skin_oral	30		1	0118A1023	qb307082014_I_scaffold_77	GTTTTGGTACCATTCTAAACAACATGACTCTAAAAC	A	0519A0210_Enterococcus_faecalis_37_406	5	0519A0210	JBBB003D_scaffold_60	GGAGAAATGTAGCTGCTGTTTTGACATTAG
6489	qb307082014_J_scaffold_103 length_42650 read_count_36558	1	JBBB003D_scaffold_60|CRISPR|1|spacer|3of4| id=27790514 [location: 52988..53017 of 111508; DR: GTTTTGGTACCATTCTAAACAACATGACTCTAAAAC]	6460	4	Inf_skin_oral	30		1	0119A1024	qb307082014_J_scaffold_103	GTTTTGGTACCATTCTAAACAACATGACTCTAAAAC	A	0519A0210_Enterococcus_faecalis_37_406	5	0519A0210	JBBB003D_scaffold_60	GGAGAAATGTAGCTGCTGTTTTGACATTAG
36161	qb307082014_K_scaffold_81 length_42649 read_count_16936	1	JBBB003D_scaffold_60|CRISPR|1|spacer|3of4| id=27790514 [location: 52988..53017 of 111508; DR: GTTTTGGTACCATTCTAAACAACATGACTCTAAAAC]	36190	4	Inf_skin_oral	30		1	0120A1025	qb307082014_K_scaffold_81	GTTTTGGTACCATTCTAAACAACATGACTCTAAAAC	A	0519A0210_Enterococcus_faecalis_37_406	5	0519A0210	JBBB003D_scaffold_60	GGAGAAATGTAGCTGCTGTTTTGACATTAG
6489	qb307082014_L_scaffold_77 length_42650 read_count_11737	1	JBBB003D_scaffold_60|CRISPR|1|spacer|3of4| id=27790514 [location: 52988..53017 of 111508; DR: GTTTTGGTACCATTCTAAACAACATGACTCTAAAAC]	6460	4	Inf_skin_oral	30		1	0121A1026	qb307082014_L_scaffold_77	GTTTTGGTACCATTCTAAACAACATGACTCTAAAAC	A	0519A0210_Enterococcus_faecalis_37_406	5	0519A0210	JBBB003D_scaffold_60	GGAGAAATGTAGCTGCTGTTTTGACATTAG
33146	0512W_scaffold_4 read_length_100 length_322610 read_count_54803	0	0511A0202_scaffold_91|CRISPR|2|spacer|14of14| id=20789538 [location: 31596..31627 of 68232; DR: TTTCTTAGCTGCCTATACGGCAGTGAAC]	33115	14	Inf_skin_oral	32		5	0512W	0512W_scaffold_4	TTTCTTAGCTGCCTATACGGCAGTGAAC	A	0511A0202_Pseudomonas_aeruginosa_66_19	5	0511A0202	0511A0202_scaffold_91	TCTCAATCTCGAACATCGGCGAAAGCACGTCT
33154	0514Y_scaffold_143 read_length_100 length_34788 read_count_62112	0	0511A0202_scaffold_91|CRISPR|2|spacer|14of14| id=20789538 [location: 31596..31627 of 68232; DR: TTTCTTAGCTGCCTATACGGCAGTGAAC]	33123	14	Inf_skin_oral	32		5	0514Y	0514Y_scaffold_143	TTTCTTAGCTGCCTATACGGCAGTGAAC	A	0511A0202_Pseudomonas_aeruginosa_66_19	5	0511A0202	0511A0202_scaffold_91	TCTCAATCTCGAACATCGGCGAAAGCACGTCT
36996	0522W_scaffold_66 read_length_100 length_38712 read_count_5011	0	0511A0202_scaffold_91|CRISPR|2|spacer|14of14| id=20789538 [location: 31596..31627 of 68232; DR: TTTCTTAGCTGCCTATACGGCAGTGAAC]	36965	14	Inf_skin_oral	32	0522W_Pseudomonas_aeruginosa_phage_62_13	5	0522W	0522W_scaffold_66	TTTCTTAGCTGCCTATACGGCAGTGAAC	A	0511A0202_Pseudomonas_aeruginosa_66_19	5	0511A0202	0511A0202_scaffold_91	TCTCAATCTCGAACATCGGCGAAAGCACGTCT
1635	JBBB002J_scaffold_145 read_length_150 length_33891 read_count_4357 read_length_150 length_33891 read_count_4357	0	0511A0202_scaffold_91|CRISPR|2|spacer|14of14| id=20789538 [location: 31596..31627 of 68232; DR: TTTCTTAGCTGCCTATACGGCAGTGAAC]	1666	14	Inf_skin_oral	32		5	0511A0202	JBBB002J_scaffold_145	TTTCTTAGCTGCCTATACGGCAGTGAAC	A	0511A0202_Pseudomonas_aeruginosa_66_19	5	0511A0202	0511A0202_scaffold_91	TCTCAATCTCGAACATCGGCGAAAGCACGTCT
8447	JBBB002K_scaffold_251 read_length_150 length_10081 read_count_4330 read_length_150 length_10081 read_count_4330	0	0511A0202_scaffold_91|CRISPR|2|spacer|14of14| id=20789538 [location: 31596..31627 of 68232; DR: TTTCTTAGCTGCCTATACGGCAGTGAAC]	8416	14	Inf_skin_oral	32		5	0514A0205	JBBB002K_scaffold_251	TTTCTTAGCTGCCTATACGGCAGTGAAC	A	0511A0202_Pseudomonas_aeruginosa_66_19	5	0511A0202	0511A0202_scaffold_91	TCTCAATCTCGAACATCGGCGAAAGCACGTCT
289465	JBBB002L_scaffold_4 read_length_150 length_297911 read_count_47634 read_length_150 length_297911 read_count_47634	0	0511A0202_scaffold_91|CRISPR|2|spacer|14of14| id=20789538 [location: 31596..31627 of 68232; DR: TTTCTTAGCTGCCTATACGGCAGTGAAC]	289496	14	Inf_skin_oral	32		5	0515A0206	JBBB002L_scaffold_4	TTTCTTAGCTGCCTATACGGCAGTGAAC	A	0511A0202_Pseudomonas_aeruginosa_66_19	5	0511A0202	0511A0202_scaffold_91	TCTCAATCTCGAACATCGGCGAAAGCACGTCT
1482	JBBB003A_scaffold_516 read_length_150 length_2564 read_count_67 read_length_150 length_2564 read_count_67	0	0511A0202_scaffold_91|CRISPR|2|spacer|14of14| id=20789538 [location: 31596..31627 of 68232; DR: TTTCTTAGCTGCCTATACGGCAGTGAAC]	1513	14	Inf_skin_oral	32		5	0516A0207	JBBB003A_scaffold_516	TTTCTTAGCTGCCTATACGGCAGTGAAC	A	0511A0202_Pseudomonas_aeruginosa_66_19	5	0511A0202	0511A0202_scaffold_91	TCTCAATCTCGAACATCGGCGAAAGCACGTCT
4294	JBBB003H_scaffold_148 read_length_150 length_12692 read_count_1217	0	0511A0202_scaffold_91|CRISPR|2|spacer|14of14| id=20789538 [location: 31596..31627 of 68232; DR: TTTCTTAGCTGCCTATACGGCAGTGAAC]	4325	14	Inf_skin_oral	32		5	0523A0214	JBBB003H_scaffold_148	TTTCTTAGCTGCCTATACGGCAGTGAAC	A	0511A0202_Pseudomonas_aeruginosa_66_19	5	0511A0202	0511A0202_scaffold_91	TCTCAATCTCGAACATCGGCGAAAGCACGTCT
1342	0514Y_scaffold_1346 read_length_100 length_1555 read_count_42	1	JBBB003D_scaffold_60|CRISPR|1|spacer|2of4| id=27790514 [location: 52922..52951 of 111508; DR: GTTTTGGTACCATTCTAAACAACATGACTCTAAAAC]	1313	4	Inf_skin_oral	30		5	0514Y	0514Y_scaffold_1346	GTTTTGGTACCATTCTAAACAACATGACTCTAAAAC	A	0519A0210_Enterococcus_faecalis_37_406	5	0519A0210	JBBB003D_scaffold_60	AAAACTTTTGACGGCTCTTTAGTCAACCCA
2236	0522W_scaffold_309 read_length_100 length_17304 read_count_749	1	JBBB003D_scaffold_60|CRISPR|1|spacer|2of4| id=27790514 [location: 52922..52951 of 111508; DR: GTTTTGGTACCATTCTAAACAACATGACTCTAAAAC]	2265	4	Inf_skin_oral	30		5	0522W	0522W_scaffold_309	GTTTTGGTACCATTCTAAACAACATGACTCTAAAAC	A	0519A0210_Enterococcus_faecalis_37_406	5	0519A0210	JBBB003D_scaffold_60	AAAACTTTTGACGGCTCTTTAGTCAACCCA
15265	JBBB002F_scaffold_3 read_length_150 length_181766 read_count_45736	1	JBBB003D_scaffold_60|CRISPR|1|spacer|2of4| id=27790514 [location: 52922..52951 of 111508; DR: GTTTTGGTACCATTCTAAACAACATGACTCTAAAAC]	15236	4	Inf_skin_oral	30		5	0505A0127	JBBB002F_scaffold_3	GTTTTGGTACCATTCTAAACAACATGACTCTAAAAC	A	0519A0210_Enterococcus_faecalis_37_406	5	0519A0210	JBBB003D_scaffold_60	AAAACTTTTGACGGCTCTTTAGTCAACCCA
15265	JBBB002J_scaffold_18 read_length_150 length_181766 read_count_65523 read_length_150 length_181766 read_count_65523	1	JBBB003D_scaffold_60|CRISPR|1|spacer|2of4| id=27790514 [location: 52922..52951 of 111508; DR: GTTTTGGTACCATTCTAAACAACATGACTCTAAAAC]	15236	4	Inf_skin_oral	30		5	0511A0202	JBBB002J_scaffold_18	GTTTTGGTACCATTCTAAACAACATGACTCTAAAAC	A	0519A0210_Enterococcus_faecalis_37_406	5	0519A0210	JBBB003D_scaffold_60	AAAACTTTTGACGGCTCTTTAGTCAACCCA
15265	JBBB002K_scaffold_152 read_length_150 length_27856 read_count_8293 read_length_150 length_27856 read_count_8293	1	JBBB003D_scaffold_60|CRISPR|1|spacer|2of4| id=27790514 [location: 52922..52951 of 111508; DR: GTTTTGGTACCATTCTAAACAACATGACTCTAAAAC]	15236	4	Inf_skin_oral	30		5	0514A0205	JBBB002K_scaffold_152	GTTTTGGTACCATTCTAAACAACATGACTCTAAAAC	A	0519A0210_Enterococcus_faecalis_37_406	5	0519A0210	JBBB003D_scaffold_60	AAAACTTTTGACGGCTCTTTAGTCAACCCA
15265	JBBB002L_scaffold_159 read_length_150 length_27856 read_count_6161 read_length_150 length_27856 read_count_6161	1	JBBB003D_scaffold_60|CRISPR|1|spacer|2of4| id=27790514 [location: 52922..52951 of 111508; DR: GTTTTGGTACCATTCTAAACAACATGACTCTAAAAC]	15236	4	Inf_skin_oral	30		5	0515A0206	JBBB002L_scaffold_159	GTTTTGGTACCATTCTAAACAACATGACTCTAAAAC	A	0519A0210_Enterococcus_faecalis_37_406	5	0519A0210	JBBB003D_scaffold_60	AAAACTTTTGACGGCTCTTTAGTCAACCCA
15265	JBBB003A_scaffold_8 read_length_150 length_181601 read_count_101996 read_length_150 length_181601 read_count_101996	1	JBBB003D_scaffold_60|CRISPR|1|spacer|2of4| id=27790514 [location: 52922..52951 of 111508; DR: GTTTTGGTACCATTCTAAACAACATGACTCTAAAAC]	15236	4	Inf_skin_oral	30		5	0516A0207	JBBB003A_scaffold_8	GTTTTGGTACCATTCTAAACAACATGACTCTAAAAC	A	0519A0210_Enterococcus_faecalis_37_406	5	0519A0210	JBBB003D_scaffold_60	AAAACTTTTGACGGCTCTTTAGTCAACCCA
15844	JBBB003B_scaffold_8 read_length_150 length_182345 read_count_295360 read_length_150 length_182345 read_count_295360	1	JBBB003D_scaffold_60|CRISPR|1|spacer|2of4| id=27790514 [location: 52922..52951 of 111508; DR: GTTTTGGTACCATTCTAAACAACATGACTCTAAAAC]	15815	4	Inf_skin_oral	30		5	0517A0208	JBBB003B_scaffold_8	GTTTTGGTACCATTCTAAACAACATGACTCTAAAAC	A	0519A0210_Enterococcus_faecalis_37_406	5	0519A0210	JBBB003D_scaffold_60	AAAACTTTTGACGGCTCTTTAGTCAACCCA
166502	JBBB003C_scaffold_16 read_length_150 length_182347 read_count_254249 read_length_150 length_182347 read_count_254249	1	JBBB003D_scaffold_60|CRISPR|1|spacer|2of4| id=27790514 [location: 52922..52951 of 111508; DR: GTTTTGGTACCATTCTAAACAACATGACTCTAAAAC]	166531	4	Inf_skin_oral	30		5	0518A0209	JBBB003C_scaffold_16	GTTTTGGTACCATTCTAAACAACATGACTCTAAAAC	A	0519A0210_Enterococcus_faecalis_37_406	5	0519A0210	JBBB003D_scaffold_60	AAAACTTTTGACGGCTCTTTAGTCAACCCA
15816	JBBB003D_scaffold_12 read_length_150 length_182317 read_count_447450	1	JBBB003D_scaffold_60|CRISPR|1|spacer|2of4| id=27790514 [location: 52922..52951 of 111508; DR: GTTTTGGTACCATTCTAAACAACATGACTCTAAAAC]	15787	4	Inf_skin_oral	30	0519A0210_Enterococcus_faecalis_37_406	5	0519A0210	JBBB003D_scaffold_12	GTTTTGGTACCATTCTAAACAACATGACTCTAAAAC	A	0519A0210_Enterococcus_faecalis_37_406	5	0519A0210	JBBB003D_scaffold_60	AAAACTTTTGACGGCTCTTTAGTCAACCCA
166502	JBBB003E_scaffold_18 read_length_150 length_182348 read_count_218444 read_length_150 length_182348 read_count_218444	1	JBBB003D_scaffold_60|CRISPR|1|spacer|2of4| id=27790514 [location: 52922..52951 of 111508; DR: GTTTTGGTACCATTCTAAACAACATGACTCTAAAAC]	166531	4	Inf_skin_oral	30		5	0520A0211	JBBB003E_scaffold_18	GTTTTGGTACCATTCTAAACAACATGACTCTAAAAC	A	0519A0210_Enterococcus_faecalis_37_406	5	0519A0210	JBBB003D_scaffold_60	AAAACTTTTGACGGCTCTTTAGTCAACCCA
166502	JBBB003F_scaffold_27 read_length_150 length_182327 read_count_99922 read_length_150 length_182327 read_count_99922	1	JBBB003D_scaffold_60|CRISPR|1|spacer|2of4| id=27790514 [location: 52922..52951 of 111508; DR: GTTTTGGTACCATTCTAAACAACATGACTCTAAAAC]	166531	4	Inf_skin_oral	30		5	0521A0212	JBBB003F_scaffold_27	GTTTTGGTACCATTCTAAACAACATGACTCTAAAAC	A	0519A0210_Enterococcus_faecalis_37_406	5	0519A0210	JBBB003D_scaffold_60	AAAACTTTTGACGGCTCTTTAGTCAACCCA
15803	JBBB003G_scaffold_30 read_length_150 length_182304 read_count_206681 read_length_150 length_182304 read_count_206681	1	JBBB003D_scaffold_60|CRISPR|1|spacer|2of4| id=27790514 [location: 52922..52951 of 111508; DR: GTTTTGGTACCATTCTAAACAACATGACTCTAAAAC]	15774	4	Inf_skin_oral	30		5	0522A0213	JBBB003G_scaffold_30	GTTTTGGTACCATTCTAAACAACATGACTCTAAAAC	A	0519A0210_Enterococcus_faecalis_37_406	5	0519A0210	JBBB003D_scaffold_60	AAAACTTTTGACGGCTCTTTAGTCAACCCA
15848	JBBB003H_scaffold_6 read_length_150 length_182349 read_count_857494	1	JBBB003D_scaffold_60|CRISPR|1|spacer|2of4| id=27790514 [location: 52922..52951 of 111508; DR: GTTTTGGTACCATTCTAAACAACATGACTCTAAAAC]	15819	4	Inf_skin_oral	30		5	0523A0214	JBBB003H_scaffold_6	GTTTTGGTACCATTCTAAACAACATGACTCTAAAAC	A	0519A0210_Enterococcus_faecalis_37_406	5	0519A0210	JBBB003D_scaffold_60	AAAACTTTTGACGGCTCTTTAGTCAACCCA
15810	JBBB003I_scaffold_30 read_length_150 length_182311 read_count_324705 read_length_150 length_182311 read_count_324705	1	JBBB003D_scaffold_60|CRISPR|1|spacer|2of4| id=27790514 [location: 52922..52951 of 111508; DR: GTTTTGGTACCATTCTAAACAACATGACTCTAAAAC]	15781	4	Inf_skin_oral	30		5	0524A0215	JBBB003I_scaffold_30	GTTTTGGTACCATTCTAAACAACATGACTCTAAAAC	A	0519A0210_Enterococcus_faecalis_37_406	5	0519A0210	JBBB003D_scaffold_60	AAAACTTTTGACGGCTCTTTAGTCAACCCA
15762	JBBB003J_scaffold_30 read_length_150 length_182263 read_count_380356 read_length_150 length_182263 read_count_380356	1	JBBB003D_scaffold_60|CRISPR|1|spacer|2of4| id=27790514 [location: 52922..52951 of 111508; DR: GTTTTGGTACCATTCTAAACAACATGACTCTAAAAC]	15733	4	Inf_skin_oral	30		5	0525A0216	JBBB003J_scaffold_30	GTTTTGGTACCATTCTAAACAACATGACTCTAAAAC	A	0519A0210_Enterococcus_faecalis_37_406	5	0519A0210	JBBB003D_scaffold_60	AAAACTTTTGACGGCTCTTTAGTCAACCCA
15831	JBBB003K_scaffold_29 read_length_150 length_182332 read_count_571982 read_length_150 length_182332 read_count_571982	1	JBBB003D_scaffold_60|CRISPR|1|spacer|2of4| id=27790514 [location: 52922..52951 of 111508; DR: GTTTTGGTACCATTCTAAACAACATGACTCTAAAAC]	15802	4	Inf_skin_oral	30		5	0526A0217	JBBB003K_scaffold_29	GTTTTGGTACCATTCTAAACAACATGACTCTAAAAC	A	0519A0210_Enterococcus_faecalis_37_406	5	0519A0210	JBBB003D_scaffold_60	AAAACTTTTGACGGCTCTTTAGTCAACCCA
166502	JBBB003L_scaffold_28 read_length_150 length_182273 read_count_135863 read_length_150 length_182273 read_count_135863	1	JBBB003D_scaffold_60|CRISPR|1|spacer|2of4| id=27790514 [location: 52922..52951 of 111508; DR: GTTTTGGTACCATTCTAAACAACATGACTCTAAAAC]	166531	4	Inf_skin_oral	30		5	0527A0218	JBBB003L_scaffold_28	GTTTTGGTACCATTCTAAACAACATGACTCTAAAAC	A	0519A0210_Enterococcus_faecalis_37_406	5	0519A0210	JBBB003D_scaffold_60	AAAACTTTTGACGGCTCTTTAGTCAACCCA
166502	JBBB004A_scaffold_18 read_length_150 length_181766 read_count_66229 read_length_150 length_181766 read_count_66229	1	JBBB003D_scaffold_60|CRISPR|1|spacer|2of4| id=27790514 [location: 52922..52951 of 111508; DR: GTTTTGGTACCATTCTAAACAACATGACTCTAAAAC]	166531	4	Inf_skin_oral	30		5	0528A0219	JBBB004A_scaffold_18	GTTTTGGTACCATTCTAAACAACATGACTCTAAAAC	A	0519A0210_Enterococcus_faecalis_37_406	5	0519A0210	JBBB003D_scaffold_60	AAAACTTTTGACGGCTCTTTAGTCAACCCA
1751	0522W_scaffold_987 read_length_100 length_2145 read_count_58	0	0123W_scaffold_10|CRISPR|1|spacer|3of39| id=27365123 [location: 20202..20234 of 222435; DR: gttttccccgcgcgagcggggatgttcc]	1719	39	Inf_skin_oral	33		5	0522W	0522W_scaffold_987	GTTTTCCCCGCGCGAGCGGGGATGTTCC	W	0123W_Corynebacterium_sp__HFH0082_59_121	1	0123W	0123W_scaffold_10	CGAGGACTCCGCATCCGCTGGGAAAACCACGCC
1557	0522W_scaffold_1121 read_length_100 length_2449 read_count_49	1	0123W_scaffold_10|CRISPR|1|spacer|33of39| id=27365123 [location: 22033..22065 of 222435; DR: gttttccccgcgcgagcggggatgttcc]	1588	39	Inf_skin_oral	33		5	0522W	0522W_scaffold_1121	GTTTTCCCCGCGCGAGCGGGGATGTTCC	W	0123W_Corynebacterium_sp__HFH0082_59_121	1	0123W	0123W_scaffold_10	CGGCTGCTGTATGAGCGCGGCTGGGCAGACCCA
1723	0522W_scaffold_1030 read_length_100 length_2723 read_count_66	1	0123W_scaffold_10|CRISPR|1|spacer|38of39| id=27365123 [location: 22339..22371 of 222435; DR: gttttccccgcgcgagcggggatgttcc]	1755	39	Inf_skin_oral	33		5	0522W	0522W_scaffold_1030	GTTTTCCCCGCGCGAGCGGGGATGTTCC	W	0123W_Corynebacterium_sp__HFH0082_59_121	1	0123W	0123W_scaffold_10	CACTCCCGCGTCCGCATACATGATGTAGTCAGC
6048	0522W_scaffold_597 read_length_100 length_6582 read_count_173	1	0123W_scaffold_10|CRISPR|2|spacer|15of22| id=27365123 [location: 23419..23451 of 222435; DR: gttttccccgcgcgagcggggatgttcc]	6016	22	Inf_skin_oral	33	0522W_Corynebacterium_59_9	5	0522W	0522W_scaffold_597	GTTTTCCCCGCGCGAGCGGGGATGTTCC	W	0123W_Corynebacterium_sp__HFH0082_59_121	1	0123W	0123W_scaffold_10	CGGGCCAATAAACGGCTCAATAACCGCGGCACC
17201	0522W_scaffold_309 read_length_100 length_17304 read_count_749	0	qb307082014_D_scaffold_23|CRISPR|1|spacer|7of8| id=7296450 [location: 32637..32666 of 127710; DR: gttttactgataagaaattattgagagtacaaaaac]	17172	8	Inf_skin_oral	30		5	0522W	0522W_scaffold_309	GTTTTACTGATAAGAAATTATTGAGAGTACAAAAAC	A	0113A1018_Enterococcus_faecalis_36_17	1	0113A1018	qb307082014_D_scaffold_23	GATTGAGGGAATTTTGATTGATGCTGGTTA
208	JBBB002F_scaffold_3 read_length_150 length_181766 read_count_45736	0	qb307082014_D_scaffold_23|CRISPR|1|spacer|7of8| id=7296450 [location: 32637..32666 of 127710; DR: gttttactgataagaaattattgagagtacaaaaac]	237	8	Inf_skin_oral	30		5	0505A0127	JBBB002F_scaffold_3	GTTTTACTGATAAGAAATTATTGAGAGTACAAAAAC	A	0113A1018_Enterococcus_faecalis_36_17	1	0113A1018	qb307082014_D_scaffold_23	GATTGAGGGAATTTTGATTGATGCTGGTTA
208	JBBB002J_scaffold_18 read_length_150 length_181766 read_count_65523 read_length_150 length_181766 read_count_65523	0	qb307082014_D_scaffold_23|CRISPR|1|spacer|7of8| id=7296450 [location: 32637..32666 of 127710; DR: gttttactgataagaaattattgagagtacaaaaac]	237	8	Inf_skin_oral	30		5	0511A0202	JBBB002J_scaffold_18	GTTTTACTGATAAGAAATTATTGAGAGTACAAAAAC	A	0113A1018_Enterococcus_faecalis_36_17	1	0113A1018	qb307082014_D_scaffold_23	GATTGAGGGAATTTTGATTGATGCTGGTTA
208	JBBB002K_scaffold_152 read_length_150 length_27856 read_count_8293 read_length_150 length_27856 read_count_8293	0	qb307082014_D_scaffold_23|CRISPR|1|spacer|7of8| id=7296450 [location: 32637..32666 of 127710; DR: gttttactgataagaaattattgagagtacaaaaac]	237	8	Inf_skin_oral	30		5	0514A0205	JBBB002K_scaffold_152	GTTTTACTGATAAGAAATTATTGAGAGTACAAAAAC	A	0113A1018_Enterococcus_faecalis_36_17	1	0113A1018	qb307082014_D_scaffold_23	GATTGAGGGAATTTTGATTGATGCTGGTTA
208	JBBB002L_scaffold_159 read_length_150 length_27856 read_count_6161 read_length_150 length_27856 read_count_6161	0	qb307082014_D_scaffold_23|CRISPR|1|spacer|7of8| id=7296450 [location: 32637..32666 of 127710; DR: gttttactgataagaaattattgagagtacaaaaac]	237	8	Inf_skin_oral	30		5	0515A0206	JBBB002L_scaffold_159	GTTTTACTGATAAGAAATTATTGAGAGTACAAAAAC	A	0113A1018_Enterococcus_faecalis_36_17	1	0113A1018	qb307082014_D_scaffold_23	GATTGAGGGAATTTTGATTGATGCTGGTTA
208	JBBB003A_scaffold_8 read_length_150 length_181601 read_count_101996 read_length_150 length_181601 read_count_101996	0	qb307082014_D_scaffold_23|CRISPR|1|spacer|7of8| id=7296450 [location: 32637..32666 of 127710; DR: gttttactgataagaaattattgagagtacaaaaac]	237	8	Inf_skin_oral	30		5	0516A0207	JBBB003A_scaffold_8	GTTTTACTGATAAGAAATTATTGAGAGTACAAAAAC	A	0113A1018_Enterococcus_faecalis_36_17	1	0113A1018	qb307082014_D_scaffold_23	GATTGAGGGAATTTTGATTGATGCTGGTTA
787	JBBB003B_scaffold_8 read_length_150 length_182345 read_count_295360 read_length_150 length_182345 read_count_295360	0	qb307082014_D_scaffold_23|CRISPR|1|spacer|7of8| id=7296450 [location: 32637..32666 of 127710; DR: gttttactgataagaaattattgagagtacaaaaac]	816	8	Inf_skin_oral	30		5	0517A0208	JBBB003B_scaffold_8	GTTTTACTGATAAGAAATTATTGAGAGTACAAAAAC	A	0113A1018_Enterococcus_faecalis_36_17	1	0113A1018	qb307082014_D_scaffold_23	GATTGAGGGAATTTTGATTGATGCTGGTTA
181559	JBBB003C_scaffold_16 read_length_150 length_182347 read_count_254249 read_length_150 length_182347 read_count_254249	0	qb307082014_D_scaffold_23|CRISPR|1|spacer|7of8| id=7296450 [location: 32637..32666 of 127710; DR: gttttactgataagaaattattgagagtacaaaaac]	181530	8	Inf_skin_oral	30		5	0518A0209	JBBB003C_scaffold_16	GTTTTACTGATAAGAAATTATTGAGAGTACAAAAAC	A	0113A1018_Enterococcus_faecalis_36_17	1	0113A1018	qb307082014_D_scaffold_23	GATTGAGGGAATTTTGATTGATGCTGGTTA
759	JBBB003D_scaffold_12 read_length_150 length_182317 read_count_447450	0	qb307082014_D_scaffold_23|CRISPR|1|spacer|7of8| id=7296450 [location: 32637..32666 of 127710; DR: gttttactgataagaaattattgagagtacaaaaac]	788	8	Inf_skin_oral	30	0519A0210_Enterococcus_faecalis_37_406	5	0519A0210	JBBB003D_scaffold_12	GTTTTACTGATAAGAAATTATTGAGAGTACAAAAAC	A	0113A1018_Enterococcus_faecalis_36_17	1	0113A1018	qb307082014_D_scaffold_23	GATTGAGGGAATTTTGATTGATGCTGGTTA
181559	JBBB003E_scaffold_18 read_length_150 length_182348 read_count_218444 read_length_150 length_182348 read_count_218444	0	qb307082014_D_scaffold_23|CRISPR|1|spacer|7of8| id=7296450 [location: 32637..32666 of 127710; DR: gttttactgataagaaattattgagagtacaaaaac]	181530	8	Inf_skin_oral	30		5	0520A0211	JBBB003E_scaffold_18	GTTTTACTGATAAGAAATTATTGAGAGTACAAAAAC	A	0113A1018_Enterococcus_faecalis_36_17	1	0113A1018	qb307082014_D_scaffold_23	GATTGAGGGAATTTTGATTGATGCTGGTTA
181559	JBBB003F_scaffold_27 read_length_150 length_182327 read_count_99922 read_length_150 length_182327 read_count_99922	0	qb307082014_D_scaffold_23|CRISPR|1|spacer|7of8| id=7296450 [location: 32637..32666 of 127710; DR: gttttactgataagaaattattgagagtacaaaaac]	181530	8	Inf_skin_oral	30		5	0521A0212	JBBB003F_scaffold_27	GTTTTACTGATAAGAAATTATTGAGAGTACAAAAAC	A	0113A1018_Enterococcus_faecalis_36_17	1	0113A1018	qb307082014_D_scaffold_23	GATTGAGGGAATTTTGATTGATGCTGGTTA
746	JBBB003G_scaffold_30 read_length_150 length_182304 read_count_206681 read_length_150 length_182304 read_count_206681	0	qb307082014_D_scaffold_23|CRISPR|1|spacer|7of8| id=7296450 [location: 32637..32666 of 127710; DR: gttttactgataagaaattattgagagtacaaaaac]	775	8	Inf_skin_oral	30		5	0522A0213	JBBB003G_scaffold_30	GTTTTACTGATAAGAAATTATTGAGAGTACAAAAAC	A	0113A1018_Enterococcus_faecalis_36_17	1	0113A1018	qb307082014_D_scaffold_23	GATTGAGGGAATTTTGATTGATGCTGGTTA
791	JBBB003H_scaffold_6 read_length_150 length_182349 read_count_857494	0	qb307082014_D_scaffold_23|CRISPR|1|spacer|7of8| id=7296450 [location: 32637..32666 of 127710; DR: gttttactgataagaaattattgagagtacaaaaac]	820	8	Inf_skin_oral	30		5	0523A0214	JBBB003H_scaffold_6	GTTTTACTGATAAGAAATTATTGAGAGTACAAAAAC	A	0113A1018_Enterococcus_faecalis_36_17	1	0113A1018	qb307082014_D_scaffold_23	GATTGAGGGAATTTTGATTGATGCTGGTTA
753	JBBB003I_scaffold_30 read_length_150 length_182311 read_count_324705 read_length_150 length_182311 read_count_324705	0	qb307082014_D_scaffold_23|CRISPR|1|spacer|7of8| id=7296450 [location: 32637..32666 of 127710; DR: gttttactgataagaaattattgagagtacaaaaac]	782	8	Inf_skin_oral	30		5	0524A0215	JBBB003I_scaffold_30	GTTTTACTGATAAGAAATTATTGAGAGTACAAAAAC	A	0113A1018_Enterococcus_faecalis_36_17	1	0113A1018	qb307082014_D_scaffold_23	GATTGAGGGAATTTTGATTGATGCTGGTTA
774	JBBB003K_scaffold_29 read_length_150 length_182332 read_count_571982 read_length_150 length_182332 read_count_571982	0	qb307082014_D_scaffold_23|CRISPR|1|spacer|7of8| id=7296450 [location: 32637..32666 of 127710; DR: gttttactgataagaaattattgagagtacaaaaac]	803	8	Inf_skin_oral	30		5	0526A0217	JBBB003K_scaffold_29	GTTTTACTGATAAGAAATTATTGAGAGTACAAAAAC	A	0113A1018_Enterococcus_faecalis_36_17	1	0113A1018	qb307082014_D_scaffold_23	GATTGAGGGAATTTTGATTGATGCTGGTTA
181559	JBBB003L_scaffold_28 read_length_150 length_182273 read_count_135863 read_length_150 length_182273 read_count_135863	0	qb307082014_D_scaffold_23|CRISPR|1|spacer|7of8| id=7296450 [location: 32637..32666 of 127710; DR: gttttactgataagaaattattgagagtacaaaaac]	181530	8	Inf_skin_oral	30		5	0527A0218	JBBB003L_scaffold_28	GTTTTACTGATAAGAAATTATTGAGAGTACAAAAAC	A	0113A1018_Enterococcus_faecalis_36_17	1	0113A1018	qb307082014_D_scaffold_23	GATTGAGGGAATTTTGATTGATGCTGGTTA
181559	JBBB004A_scaffold_18 read_length_150 length_181766 read_count_66229 read_length_150 length_181766 read_count_66229	0	qb307082014_D_scaffold_23|CRISPR|1|spacer|7of8| id=7296450 [location: 32637..32666 of 127710; DR: gttttactgataagaaattattgagagtacaaaaac]	181530	8	Inf_skin_oral	30		5	0528A0219	JBBB004A_scaffold_18	GTTTTACTGATAAGAAATTATTGAGAGTACAAAAAC	A	0113A1018_Enterococcus_faecalis_36_17	1	0113A1018	qb307082014_D_scaffold_23	GATTGAGGGAATTTTGATTGATGCTGGTTA
12	JBBB003D_scaffold_1552 read_length_150 length_1864 read_count_45	0	JBBB003G_scaffold_5|CRISPR|1|spacer|39of39| id=27794659 [location: 155760..155796 of 423185; DR: GTTTTATATTAACTATGAGGAATGTAAAT]	48	39	Inf_skin_oral	37		5	0519A0210	JBBB003D_scaffold_1552	GTTTTATATTAACTATGAGGAATGTAAAT	A	0522A0213_Clostridium_perfringens_28_397	5	0522A0213	JBBB003G_scaffold_5	TCATCTGATAAAACTCTTAAAATAATATATTGATTAC
2068	JBBB003H_scaffold_475 read_length_150 length_2117 read_count_60	1	0511A0202_scaffold_91|CRISPR|1|spacer|5of20| id=20789538 [location: 21299..21330 of 68232; DR: GTTCACTGCCGTGTAGGCAGCTAAGAAA]	2099	20	Inf_skin_oral	32		5	0523A0214	JBBB003H_scaffold_475	GTTCACTGCCGTGTAGGCAGCTAAGAAA	A	0511A0202_Pseudomonas_aeruginosa_66_19	5	0511A0202	0511A0202_scaffold_91	CATCCAATTCGCCGATCCGGCGCAAGCGCCCG
9040	174_005_scaffold_148 length_37091 read_count_3448	0	qb307082014_D_scaffold_23|CRISPR|1|spacer|7of8| id=7296450 [location: 32637..32666 of 127710; DR: gttttactgataagaaattattgagagtacaaaaac]	9069	8	NEC_EVENT	30		174	174_005	174_005_scaffold_148	GTTTTACTGATAAGAAATTATTGAGAGTACAAAAAC	A	0113A1018_Enterococcus_faecalis_36_17	1	0113A1018	qb307082014_D_scaffold_23	GATTGAGGGAATTTTGATTGATGCTGGTTA
36109	174_006_scaffold_79 length_37091 read_count_4456	0	qb307082014_D_scaffold_23|CRISPR|1|spacer|7of8| id=7296450 [location: 32637..32666 of 127710; DR: gttttactgataagaaattattgagagtacaaaaac]	36138	8	NEC_EVENT	30		174	174_006	174_006_scaffold_79	GTTTTACTGATAAGAAATTATTGAGAGTACAAAAAC	A	0113A1018_Enterococcus_faecalis_36_17	1	0113A1018	qb307082014_D_scaffold_23	GATTGAGGGAATTTTGATTGATGCTGGTTA
9040	174_007_scaffold_144 length_37091 read_count_5103	0	qb307082014_D_scaffold_23|CRISPR|1|spacer|7of8| id=7296450 [location: 32637..32666 of 127710; DR: gttttactgataagaaattattgagagtacaaaaac]	9069	8	NEC_EVENT	30		174	174_007	174_007_scaffold_144	GTTTTACTGATAAGAAATTATTGAGAGTACAAAAAC	A	0113A1018_Enterococcus_faecalis_36_17	1	0113A1018	qb307082014_D_scaffold_23	GATTGAGGGAATTTTGATTGATGCTGGTTA
9632	175_006_scaffold_205 length_36387 read_count_2217	0	qb307082014_D_scaffold_23|CRISPR|1|spacer|7of8| id=7296450 [location: 32637..32666 of 127710; DR: gttttactgataagaaattattgagagtacaaaaac]	9661	8	NEC_EVENT	30		175	175_006	175_006_scaffold_205	GTTTTACTGATAAGAAATTATTGAGAGTACAAAAAC	A	0113A1018_Enterococcus_faecalis_36_17	1	0113A1018	qb307082014_D_scaffold_23	GATTGAGGGAATTTTGATTGATGCTGGTTA
42235	175_008_scaffold_47 length_115030 read_count_9065	0	qb307082014_D_scaffold_23|CRISPR|1|spacer|7of8| id=7296450 [location: 32637..32666 of 127710; DR: gttttactgataagaaattattgagagtacaaaaac]	42264	8	NEC_EVENT	30		175	175_008	175_008_scaffold_47	GTTTTACTGATAAGAAATTATTGAGAGTACAAAAAC	A	0113A1018_Enterococcus_faecalis_36_17	1	0113A1018	qb307082014_D_scaffold_23	GATTGAGGGAATTTTGATTGATGCTGGTTA
43118	182_001_scaffold_39 length_81430 read_count_327449	0	qb307082014_D_scaffold_23|CRISPR|1|spacer|7of8| id=7296450 [location: 32637..32666 of 127710; DR: gttttactgataagaaattattgagagtacaaaaac]	43147	8	NEC_EVENT	30		182	182_001	182_001_scaffold_39	GTTTTACTGATAAGAAATTATTGAGAGTACAAAAAC	A	0113A1018_Enterococcus_faecalis_36_17	1	0113A1018	qb307082014_D_scaffold_23	GATTGAGGGAATTTTGATTGATGCTGGTTA
43118	182_002_scaffold_36 length_81430 read_count_542921	0	qb307082014_D_scaffold_23|CRISPR|1|spacer|7of8| id=7296450 [location: 32637..32666 of 127710; DR: gttttactgataagaaattattgagagtacaaaaac]	43147	8	NEC_EVENT	30		182	182_002	182_002_scaffold_36	GTTTTACTGATAAGAAATTATTGAGAGTACAAAAAC	A	0113A1018_Enterococcus_faecalis_36_17	1	0113A1018	qb307082014_D_scaffold_23	GATTGAGGGAATTTTGATTGATGCTGGTTA
2658	175_002_scaffold_1795 length_3315 read_count_181	0	0511A0202_scaffold_91|CRISPR|2|spacer|8of14| id=20789538 [location: 31236..31267 of 68232; DR: TTTCTTAGCTGCCTATACGGCAGTGAAC]	2627	14	NEC_EVENT	32		175	175_002	175_002_scaffold_1795	TTTCTTAGCTGCCTATACGGCAGTGAAC	A	0511A0202_Pseudomonas_aeruginosa_66_19	5	0511A0202	0511A0202_scaffold_91	GCCTGGTCGGTGAGCAGGAGGGTGCGATGCAA
2046	175_006_scaffold_2509 length_2698 read_count_109	0	0511A0202_scaffold_91|CRISPR|2|spacer|8of14| id=20789538 [location: 31236..31267 of 68232; DR: TTTCTTAGCTGCCTATACGGCAGTGAAC]	2077	14	NEC_EVENT	32		175	175_006	175_006_scaffold_2509	TTTCTTAGCTGCCTATACGGCAGTGAAC	A	0511A0202_Pseudomonas_aeruginosa_66_19	5	0511A0202	0511A0202_scaffold_91	GCCTGGTCGGTGAGCAGGAGGGTGCGATGCAA
2518	175_007_scaffold_1661 length_2675 read_count_101	0	0511A0202_scaffold_91|CRISPR|2|spacer|8of14| id=20789538 [location: 31236..31267 of 68232; DR: TTTCTTAGCTGCCTATACGGCAGTGAAC]	2487	14	NEC_EVENT	32		175	175_007	175_007_scaffold_1661	TTTCTTAGCTGCCTATACGGCAGTGAAC	A	0511A0202_Pseudomonas_aeruginosa_66_19	5	0511A0202	0511A0202_scaffold_91	GCCTGGTCGGTGAGCAGGAGGGTGCGATGCAA
3976	175_006_scaffold_888 length_7449 read_count_365	0	JBBB003D_scaffold_58_set_1_revised|CRISPR|1|spacer|5of13| [location: 174050..174079 of 239880; DR: GTTTTGGTACCATTCTAAACAACATGACTCTAAAAC]	3947	13	NEC_EVENT	30		175	175_006	175_006_scaffold_888	GTTTTGGTACCATTCTAAACAACATGACTCTAAAAC	A	0519A0210_Enterococcus_faecalis_37_406	5	0519A0210	JBBB003D_scaffold_58_set_1_revised	GAAAGCGTTGTGTAATGTGTCCATTTCTTT
3474	175_008_scaffold_404 length_19126 read_count_1561	0	JBBB003D_scaffold_58_set_1_revised|CRISPR|1|spacer|5of13| [location: 174050..174079 of 239880; DR: GTTTTGGTACCATTCTAAACAACATGACTCTAAAAC]	3503	13	NEC_EVENT	30		175	175_008	175_008_scaffold_404	GTTTTGGTACCATTCTAAACAACATGACTCTAAAAC	A	0519A0210_Enterococcus_faecalis_37_406	5	0519A0210	JBBB003D_scaffold_58_set_1_revised	GAAAGCGTTGTGTAATGTGTCCATTTCTTT
5467	175_006_scaffold_606 length_11579 read_count_615	0	qb307082014_D_scaffold_23|CRISPR|1|spacer|6of8| id=7296450 [location: 32571..32600 of 127710; DR: gttttactgataagaaattattgagagtacaaaaac]	5496	8	NEC_EVENT	30		175	175_006	175_006_scaffold_606	GTTTTACTGATAAGAAATTATTGAGAGTACAAAAAC	A	0113A1018_Enterococcus_faecalis_36_17	1	0113A1018	qb307082014_D_scaffold_23	TACTAATCGTTCATTCAATGCTTGCTCGTT
13003	175_008_scaffold_404 length_19126 read_count_1561	0	qb307082014_D_scaffold_23|CRISPR|1|spacer|6of8| id=7296450 [location: 32571..32600 of 127710; DR: gttttactgataagaaattattgagagtacaaaaac]	13032	8	NEC_EVENT	30		175	175_008	175_008_scaffold_404	GTTTTACTGATAAGAAATTATTGAGAGTACAAAAAC	A	0113A1018_Enterococcus_faecalis_36_17	1	0113A1018	qb307082014_D_scaffold_23	TACTAATCGTTCATTCAATGCTTGCTCGTT
12396	NIHY1_08_scaffold_195 id=10887086 bin=NIHY1_08_Enterococcus_faecalis_37_378	0	qb307082014_D_scaffold_23|CRISPR|1|spacer|7of8| id=7296450 [location: 32637..32666 of 127710; DR: gttttactgataagaaattattgagagtacaaaaac]	12425	8	NIH_1	30		8	NIHY1_08	NIHY1_08_scaffold_195	GTTTTACTGATAAGAAATTATTGAGAGTACAAAAAC	A	0113A1018_Enterococcus_faecalis_36_17	1	0113A1018	qb307082014_D_scaffold_23	GATTGAGGGAATTTTGATTGATGCTGGTTA
12873	NIHY1_23_scaffold_8011 id=11594116 bin=NIHY1_23_Enterococcus_faecalis_37_903	0	qb307082014_D_scaffold_23|CRISPR|1|spacer|7of8| id=7296450 [location: 32637..32666 of 127710; DR: gttttactgataagaaattattgagagtacaaaaac]	12902	8	NIH_1	30		23	NIHY1_23	NIHY1_23_scaffold_8011	GTTTTACTGATAAGAAATTATTGAGAGTACAAAAAC	A	0113A1018_Enterococcus_faecalis_36_17	1	0113A1018	qb307082014_D_scaffold_23	GATTGAGGGAATTTTGATTGATGCTGGTTA
15478	NIHY1_08_scaffold_29 id=10886940 bin=NIHY1_08_Enterococcus_faecalis_37_378	0	JBBB003D_scaffold_58_set_1_revised|CRISPR|1|spacer|5of13| [location: 174050..174079 of 239880; DR: GTTTTGGTACCATTCTAAACAACATGACTCTAAAAC]	15449	13	NIH_1	30		8	NIHY1_08	NIHY1_08_scaffold_29	GTTTTGGTACCATTCTAAACAACATGACTCTAAAAC	A	0519A0210_Enterococcus_faecalis_37_406	5	0519A0210	JBBB003D_scaffold_58_set_1_revised	GAAAGCGTTGTGTAATGTGTCCATTTCTTT
7217	NIHY1_19_scaffold_1249 id=10899212 bin=NIHY1_19_Enterococcus_faecalis_34_63	0	JBBB003D_scaffold_58_set_1_revised|CRISPR|1|spacer|5of13| [location: 174050..174079 of 239880; DR: GTTTTGGTACCATTCTAAACAACATGACTCTAAAAC]	7246	13	NIH_1	30		19	NIHY1_19	NIHY1_19_scaffold_1249	GTTTTGGTACCATTCTAAACAACATGACTCTAAAAC	A	0519A0210_Enterococcus_faecalis_37_406	5	0519A0210	JBBB003D_scaffold_58_set_1_revised	GAAAGCGTTGTGTAATGTGTCCATTTCTTT
23925	NIHY1_23_scaffold_2429 id=11595515 bin=NIHY1_23_Enterococcus_faecalis_37_903	0	JBBB003D_scaffold_58_set_1_revised|CRISPR|1|spacer|5of13| [location: 174050..174079 of 239880; DR: GTTTTGGTACCATTCTAAACAACATGACTCTAAAAC]	23954	13	NIH_1	30		23	NIHY1_23	NIHY1_23_scaffold_2429	GTTTTGGTACCATTCTAAACAACATGACTCTAAAAC	A	0519A0210_Enterococcus_faecalis_37_406	5	0519A0210	JBBB003D_scaffold_58_set_1_revised	GAAAGCGTTGTGTAATGTGTCCATTTCTTT
33641	NIHY1_04_scaffold_128 id=10886066 bin=NIHY1_04_Pseudomonas_aeruginosa_66_854	0	0511A0202_scaffold_91|CRISPR|2|spacer|14of14| id=20789538 [location: 31596..31627 of 68232; DR: TTTCTTAGCTGCCTATACGGCAGTGAAC]	33610	14	NIH_1	32		4	NIHY1_04	NIHY1_04_scaffold_128	TTTCTTAGCTGCCTATACGGCAGTGAAC	A	0511A0202_Pseudomonas_aeruginosa_66_19	5	0511A0202	0511A0202_scaffold_91	TCTCAATCTCGAACATCGGCGAAAGCACGTCT
32984	NIHY1_14_scaffold_3741 id=10894380 bin=NIHY1_14_Pseudomonas_aeruginosa_66_73	0	0511A0202_scaffold_91|CRISPR|2|spacer|14of14| id=20789538 [location: 31596..31627 of 68232; DR: TTTCTTAGCTGCCTATACGGCAGTGAAC]	32953	14	NIH_1	32		14	NIHY1_14	NIHY1_14_scaffold_3741	TTTCTTAGCTGCCTATACGGCAGTGAAC	A	0511A0202_Pseudomonas_aeruginosa_66_19	5	0511A0202	0511A0202_scaffold_91	TCTCAATCTCGAACATCGGCGAAAGCACGTCT
28826	NIHY1_08_scaffold_29 id=10886940 bin=NIHY1_08_Enterococcus_faecalis_37_378	0	JBBB003D_scaffold_58_set_1_revised|CRISPR|1|spacer|8of13| [location: 174248..174277 of 239880; DR: GTTTTGGTACCATTCTAAACAACATGACTCTAAAAC]	28797	13	NIH_1	30		8	NIHY1_08	NIHY1_08_scaffold_29	GTTTTGGTACCATTCTAAACAACATGACTCTAAAAC	A	0519A0210_Enterococcus_faecalis_37_406	5	0519A0210	JBBB003D_scaffold_58_set_1_revised	CAACAATTTCCACCATACGTTTTTTCTCGC
101324	NIHY1_09_scaffold_3395 id=10890240 bin=NIHY1_09_Enterococcus_faecalis_37_1640	0	JBBB003D_scaffold_58_set_1_revised|CRISPR|1|spacer|8of13| [location: 174248..174277 of 239880; DR: GTTTTGGTACCATTCTAAACAACATGACTCTAAAAC]	101295	13	NIH_1	30		9	NIHY1_09	NIHY1_09_scaffold_3395	GTTTTGGTACCATTCTAAACAACATGACTCTAAAAC	A	0519A0210_Enterococcus_faecalis_37_406	5	0519A0210	JBBB003D_scaffold_58_set_1_revised	CAACAATTTCCACCATACGTTTTTTCTCGC
7061	NIHY1_11_scaffold_234 id=10891200 bin=NIHY1_11_Enterococcus_faecalis_34_34	0	JBBB003D_scaffold_58_set_1_revised|CRISPR|1|spacer|8of13| [location: 174248..174277 of 239880; DR: GTTTTGGTACCATTCTAAACAACATGACTCTAAAAC]	7090	13	NIH_1	30		11	NIHY1_11	NIHY1_11_scaffold_234	GTTTTGGTACCATTCTAAACAACATGACTCTAAAAC	A	0519A0210_Enterococcus_faecalis_37_406	5	0519A0210	JBBB003D_scaffold_58_set_1_revised	CAACAATTTCCACCATACGTTTTTTCTCGC
10577	NIHY1_23_scaffold_2429 id=11595515 bin=NIHY1_23_Enterococcus_faecalis_37_903	0	JBBB003D_scaffold_58_set_1_revised|CRISPR|1|spacer|8of13| [location: 174248..174277 of 239880; DR: GTTTTGGTACCATTCTAAACAACATGACTCTAAAAC]	10606	13	NIH_1	30		23	NIHY1_23	NIHY1_23_scaffold_2429	GTTTTGGTACCATTCTAAACAACATGACTCTAAAAC	A	0519A0210_Enterococcus_faecalis_37_406	5	0519A0210	JBBB003D_scaffold_58_set_1_revised	CAACAATTTCCACCATACGTTTTTTCTCGC
4245	NIHY1_18_scaffold_148 id=10897097 bin=NIHY1_18_Pseudomonas_aeruginosa_66_97	0	0511A0202_scaffold_91|CRISPR|2|spacer|2of14| id=20789538 [location: 30876..30907 of 68232; DR: TTTCTTAGCTGCCTATACGGCAGTGAAC]	4214	14	NIH_1	32		18	NIHY1_18	NIHY1_18_scaffold_148	TTTCTTAGCTGCCTATACGGCAGTGAAC	A	0511A0202_Pseudomonas_aeruginosa_66_19	5	0511A0202	0511A0202_scaffold_91	GCGTCAGCTTACAACTGGCTCGGCGTAGCTAT
3119	NIHY1_19_scaffold_2245 id=10899888 bin=NIHY1_19_Enterococcus_faecalis_37_4788	0	qb307082014_D_scaffold_23|CRISPR|1|spacer|5of8| id=7296450 [location: 32505..32534 of 127710; DR: gttttactgataagaaattattgagagtacaaaaac]	3090	8	NIH_1	30		19	NIHY1_19	NIHY1_19_scaffold_2245	GTTTTACTGATAAGAAATTATTGAGAGTACAAAAAC	A	0113A1018_Enterococcus_faecalis_36_17	1	0113A1018	qb307082014_D_scaffold_23	AAGAATGGGACCAGATCGGCTGGGGAACGA

## Sheet: NCBI_protospacers
Spacer	length	Hit	From	To	Mismatches	spacer_scaffold	protospacer_scaffold	repeat_sequence	protospacer_project	spacer_project	array_len	spacer_sequence	spacer_infant	spacer_BodySite	spacer_bin
JBBB003D_scaffold_58_set_1_revised|CRISPR|1|spacer|5of13| [location: 174050..174079 of 239880; DR: GTTTTGGTACCATTCTAAACAACATGACTCTAAAAC]	30	gi|270209418|gb|GQ478085.1| Enterococcus phage phiFL2B, complete genome	14721	14692	0	JBBB003D_scaffold_58_set_1_revised	Enterococcus phage phiFL2B, complete genome	GTTTTGGTACCATTCTAAACAACATGACTCTAAAAC	Enterococcus phage phiFL2B, complete genome	0519A0210	13	GAAAGCGTTGTGTAATGTGTCCATTTCTTT	5	A	0519A0210_Enterococcus_faecalis_37_406
JBBB003D_scaffold_58_set_1_revised|CRISPR|1|spacer|5of13| [location: 174050..174079 of 239880; DR: GTTTTGGTACCATTCTAAACAACATGACTCTAAAAC]	30	gi|270209354|gb|GQ478084.1| Enterococcus phage phiFL2A, complete genome	14132	14103	0	JBBB003D_scaffold_58_set_1_revised	Enterococcus phage phiFL2A, complete genome	GTTTTGGTACCATTCTAAACAACATGACTCTAAAAC	Enterococcus phage phiFL2A, complete genome	0519A0210	13	GAAAGCGTTGTGTAATGTGTCCATTTCTTT	5	A	0519A0210_Enterococcus_faecalis_37_406
JBBB003D_scaffold_58_set_1_revised|CRISPR|1|spacer|5of13| [location: 174050..174079 of 239880; DR: GTTTTGGTACCATTCTAAACAACATGACTCTAAAAC]	30	gi|953700706|gb|KT945994.1| Enterococcus phage vB_IME197, complete genome	13171	13142	1	JBBB003D_scaffold_58_set_1_revised	Enterococcus phage vB_IME197, complete genome	GTTTTGGTACCATTCTAAACAACATGACTCTAAAAC	Enterococcus phage vB_IME197, complete genome	0519A0210	13	GAAAGCGTTGTGTAATGTGTCCATTTCTTT	5	A	0519A0210_Enterococcus_faecalis_37_406
JBBB003D_scaffold_58_set_1_revised|CRISPR|1|spacer|5of13| [location: 174050..174079 of 239880; DR: GTTTTGGTACCATTCTAAACAACATGACTCTAAAAC]	30	gi|270209543|gb|GQ478087.1| Enterococcus phage phiFL3B, complete genome	15545	15516	1	JBBB003D_scaffold_58_set_1_revised	Enterococcus phage phiFL3B, complete genome	GTTTTGGTACCATTCTAAACAACATGACTCTAAAAC	Enterococcus phage phiFL3B, complete genome	0519A0210	13	GAAAGCGTTGTGTAATGTGTCCATTTCTTT	5	A	0519A0210_Enterococcus_faecalis_37_406
JBBB003D_scaffold_58_set_1_revised|CRISPR|1|spacer|5of13| [location: 174050..174079 of 239880; DR: GTTTTGGTACCATTCTAAACAACATGACTCTAAAAC]	30	gi|270209478|gb|GQ478086.1| Enterococcus phage phiFL3A, complete genome	15239	15210	1	JBBB003D_scaffold_58_set_1_revised	Enterococcus phage phiFL3A, complete genome	GTTTTGGTACCATTCTAAACAACATGACTCTAAAAC	Enterococcus phage phiFL3A, complete genome	0519A0210	13	GAAAGCGTTGTGTAATGTGTCCATTTCTTT	5	A	0519A0210_Enterococcus_faecalis_37_406
JBBB003D_scaffold_58_set_1_revised|CRISPR|1|spacer|5of13| [location: 174050..174079 of 239880; DR: GTTTTGGTACCATTCTAAACAACATGACTCTAAAAC]	30	gi|258598076|gb|GQ452243.1| Enterococcus phage phiEf11, complete genome	39526	39497	1	JBBB003D_scaffold_58_set_1_revised	Enterococcus phage phiEf11, complete genome	GTTTTGGTACCATTCTAAACAACATGACTCTAAAAC	Enterococcus phage phiEf11, complete genome	0519A0210	13	GAAAGCGTTGTGTAATGTGTCCATTTCTTT	5	A	0519A0210_Enterococcus_faecalis_37_406
JBBB003D_scaffold_58_set_1_revised|CRISPR|1|spacer|8of13| [location: 174248..174277 of 239880; DR: GTTTTGGTACCATTCTAAACAACATGACTCTAAAAC]	30	gi|953700706|gb|KT945994.1| Enterococcus phage vB_IME197, complete genome	26616	26587	0	JBBB003D_scaffold_58_set_1_revised	Enterococcus phage vB_IME197, complete genome	GTTTTGGTACCATTCTAAACAACATGACTCTAAAAC	Enterococcus phage vB_IME197, complete genome	0519A0210	13	CAACAATTTCCACCATACGTTTTTTCTCGC	5	A	0519A0210_Enterococcus_faecalis_37_406
JBBB003D_scaffold_58_set_1_revised|CRISPR|1|spacer|8of13| [location: 174248..174277 of 239880; DR: GTTTTGGTACCATTCTAAACAACATGACTCTAAAAC]	30	gi|258598076|gb|GQ452243.1| Enterococcus phage phiEf11, complete genome	12603	12574	0	JBBB003D_scaffold_58_set_1_revised	Enterococcus phage phiEf11, complete genome	GTTTTGGTACCATTCTAAACAACATGACTCTAAAAC	Enterococcus phage phiEf11, complete genome	0519A0210	13	CAACAATTTCCACCATACGTTTTTTCTCGC	5	A	0519A0210_Enterococcus_faecalis_37_406
0511A0202_scaffold_91|CRISPR|1|spacer|1of20| id=20789538 [location: 21058..21090 of 68232; DR: GTTCACTGCCGTGTAGGCAGCTAAGAAA]	33	gi|815968487|gb|CP011317.1| Pseudomonas aeruginosa strain Carb01 63, complete genome	4103819	4103787	0	0511A0202_scaffold_91	Pseudomonas aeruginosa strain Carb01 63, complete genome	GTTCACTGCCGTGTAGGCAGCTAAGAAA	Pseudomonas aeruginosa strain Carb01 63, complete genome	0511A0202	20	GGACTGATCCGCCGCACTGGTACTGACCACTAC	5	A	0511A0202_Pseudomonas_aeruginosa_66_19
0511A0202_scaffold_91|CRISPR|1|spacer|1of20| id=20789538 [location: 21058..21090 of 68232; DR: GTTCACTGCCGTGTAGGCAGCTAAGAAA]	33	gi|685837395|dbj|AP014646.1| Pseudomonas aeruginosa DNA, complete genome, strain: NCGM 1984	3741025	3740993	0	0511A0202_scaffold_91	Pseudomonas aeruginosa DNA, complete genome, strain: NCGM 1984	GTTCACTGCCGTGTAGGCAGCTAAGAAA	Pseudomonas aeruginosa DNA, complete genome, strain: NCGM 1984	0511A0202	20	GGACTGATCCGCCGCACTGGTACTGACCACTAC	5	A	0511A0202_Pseudomonas_aeruginosa_66_19
0511A0202_scaffold_91|CRISPR|1|spacer|1of20| id=20789538 [location: 21058..21090 of 68232; DR: GTTCACTGCCGTGTAGGCAGCTAAGAAA]	33	gi|670351331|dbj|AP014622.1| Pseudomonas aeruginosa DNA, complete genome, strain: NCGM 1900	5026013	5025981	0	0511A0202_scaffold_91	Pseudomonas aeruginosa DNA, complete genome, strain: NCGM 1900	GTTCACTGCCGTGTAGGCAGCTAAGAAA	Pseudomonas aeruginosa DNA, complete genome, strain: NCGM 1900	0511A0202	20	GGACTGATCCGCCGCACTGGTACTGACCACTAC	5	A	0511A0202_Pseudomonas_aeruginosa_66_19
0511A0202_scaffold_91|CRISPR|1|spacer|1of20| id=20789538 [location: 21058..21090 of 68232; DR: GTTCACTGCCGTGTAGGCAGCTAAGAAA]	33	gi|575870901|emb|HG530068.1| Pseudomonas aeruginosa PA38182, complete genome	7018748	7018780	0	0511A0202_scaffold_91	Pseudomonas aeruginosa PA38182, complete genome	GTTCACTGCCGTGTAGGCAGCTAAGAAA	Pseudomonas aeruginosa PA38182, complete genome	0511A0202	20	GGACTGATCCGCCGCACTGGTACTGACCACTAC	5	A	0511A0202_Pseudomonas_aeruginosa_66_19
0511A0202_scaffold_91|CRISPR|1|spacer|1of20| id=20789538 [location: 21058..21090 of 68232; DR: GTTCACTGCCGTGTAGGCAGCTAAGAAA]	33	gi|371767335|gb|HQ711985.1| Pseudomonas phage vB_PaeS_PMG1, complete genome	46131	46163	0	0511A0202_scaffold_91	Pseudomonas phage vB_PaeS_PMG1, complete genome	GTTCACTGCCGTGTAGGCAGCTAAGAAA	Pseudomonas phage vB_PaeS_PMG1, complete genome	0511A0202	20	GGACTGATCCGCCGCACTGGTACTGACCACTAC	5	A	0511A0202_Pseudomonas_aeruginosa_66_19
0511A0202_scaffold_91|CRISPR|1|spacer|1of20| id=20789538 [location: 21058..21090 of 68232; DR: GTTCACTGCCGTGTAGGCAGCTAAGAAA]	33	gi|291464450|gb|AF165214.2| Bacteriophage D3, complete genome	49547	49579	0	0511A0202_scaffold_91	Bacteriophage D3, complete genome	GTTCACTGCCGTGTAGGCAGCTAAGAAA	Bacteriophage D3, complete genome	0511A0202	20	GGACTGATCCGCCGCACTGGTACTGACCACTAC	5	A	0511A0202_Pseudomonas_aeruginosa_66_19
0511A0202_scaffold_91|CRISPR|1|spacer|3of20| id=20789538 [location: 21179..21210 of 68232; DR: GTTCACTGCCGTGTAGGCAGCTAAGAAA]	32	gi|937559777|gb|KT454971.1| Pseudomonas aeruginosa strain CCBH4851 genomic sequence	238340	238309	0	0511A0202_scaffold_91	Pseudomonas aeruginosa strain CCBH4851 genomic sequence	GTTCACTGCCGTGTAGGCAGCTAAGAAA	Pseudomonas aeruginosa strain CCBH4851 genomic sequence	0511A0202	20	CGGTCCTGCCAGTACTGCGGCAGGATCTGGTC	5	A	0511A0202_Pseudomonas_aeruginosa_66_19
0511A0202_scaffold_91|CRISPR|1|spacer|3of20| id=20789538 [location: 21179..21210 of 68232; DR: GTTCACTGCCGTGTAGGCAGCTAAGAAA]	32	gi|48527494|gb|AY625898.1| Pseudomonas aeruginosa phage F116, complete genome	2949	2980	1	0511A0202_scaffold_91	Pseudomonas aeruginosa phage F116, complete genome	GTTCACTGCCGTGTAGGCAGCTAAGAAA	Pseudomonas aeruginosa phage F116, complete genome	0511A0202	20	CGGTCCTGCCAGTACTGCGGCAGGATCTGGTC	5	A	0511A0202_Pseudomonas_aeruginosa_66_19
0511A0202_scaffold_91|CRISPR|1|spacer|5of20| id=20789538 [location: 21299..21330 of 68232; DR: GTTCACTGCCGTGTAGGCAGCTAAGAAA]	32	gi|957647579|dbj|AP017302.1| Pseudomonas aeruginosa DNA, complete genome, strain: IOMTU 133	2645891	2645860	1	0511A0202_scaffold_91	Pseudomonas aeruginosa DNA, complete genome, strain: IOMTU 133	GTTCACTGCCGTGTAGGCAGCTAAGAAA	Pseudomonas aeruginosa DNA, complete genome, strain: IOMTU 133	0511A0202	20	CATCCAATTCGCCGATCCGGCGCAAGCGCCCG	5	A	0511A0202_Pseudomonas_aeruginosa_66_19
0511A0202_scaffold_91|CRISPR|1|spacer|5of20| id=20789538 [location: 21299..21330 of 68232; DR: GTTCACTGCCGTGTAGGCAGCTAAGAAA]	32	gi|817624209|gb|CP011369.1| Pseudomonas aeruginosa strain S04 90 genome	2440994	2440963	1	0511A0202_scaffold_91	Pseudomonas aeruginosa strain S04 90 genome	GTTCACTGCCGTGTAGGCAGCTAAGAAA	Pseudomonas aeruginosa strain S04 90 genome	0511A0202	20	CATCCAATTCGCCGATCCGGCGCAAGCGCCCG	5	A	0511A0202_Pseudomonas_aeruginosa_66_19
0511A0202_scaffold_91|CRISPR|1|spacer|6of20| id=20789538 [location: 21359..21390 of 68232; DR: GTTCACTGCCGTGTAGGCAGCTAAGAAA]	32	gi|937559777|gb|KT454971.1| Pseudomonas aeruginosa strain CCBH4851 genomic sequence	238693	238724	0	0511A0202_scaffold_91	Pseudomonas aeruginosa strain CCBH4851 genomic sequence	GTTCACTGCCGTGTAGGCAGCTAAGAAA	Pseudomonas aeruginosa strain CCBH4851 genomic sequence	0511A0202	20	ACGAAGCAGATCGCCGAATGCGGCGTCAGCGC	5	A	0511A0202_Pseudomonas_aeruginosa_66_19
0511A0202_scaffold_91|CRISPR|1|spacer|6of20| id=20789538 [location: 21359..21390 of 68232; DR: GTTCACTGCCGTGTAGGCAGCTAAGAAA]	32	gi|48527494|gb|AY625898.1| Pseudomonas aeruginosa phage F116, complete genome	2596	2565	0	0511A0202_scaffold_91	Pseudomonas aeruginosa phage F116, complete genome	GTTCACTGCCGTGTAGGCAGCTAAGAAA	Pseudomonas aeruginosa phage F116, complete genome	0511A0202	20	ACGAAGCAGATCGCCGAATGCGGCGTCAGCGC	5	A	0511A0202_Pseudomonas_aeruginosa_66_19
0511A0202_scaffold_91|CRISPR|1|spacer|7of20| id=20789538 [location: 21419..21450 of 68232; DR: GTTCACTGCCGTGTAGGCAGCTAAGAAA]	32	gi|674252391|gb|CP008739.2| Pseudomonas aeruginosa VRFPA04, complete genome	5393387	5393418	0	0511A0202_scaffold_91	Pseudomonas aeruginosa VRFPA04, complete genome	GTTCACTGCCGTGTAGGCAGCTAAGAAA	Pseudomonas aeruginosa VRFPA04, complete genome	0511A0202	20	GTGGGTGCAAATCGCGATTCTGGTCGCGTCGT	5	A	0511A0202_Pseudomonas_aeruginosa_66_19
0511A0202_scaffold_91|CRISPR|1|spacer|7of20| id=20789538 [location: 21419..21450 of 68232; DR: GTTCACTGCCGTGTAGGCAGCTAAGAAA]	32	gi|404056911|gb|JX495043.1| Pseudomonas phage JBD67, partial genome	33659	33690	0	0511A0202_scaffold_91	Pseudomonas phage JBD67, partial genome	GTTCACTGCCGTGTAGGCAGCTAAGAAA	Pseudomonas phage JBD67, partial genome	0511A0202	20	GTGGGTGCAAATCGCGATTCTGGTCGCGTCGT	5	A	0511A0202_Pseudomonas_aeruginosa_66_19
0511A0202_scaffold_91|CRISPR|1|spacer|7of20| id=20789538 [location: 21419..21450 of 68232; DR: GTTCACTGCCGTGTAGGCAGCTAAGAAA]	32	gi|404056722|gb|JX495041.1| Pseudomonas phage JBD18, complete genome	34533	34564	0	0511A0202_scaffold_91	Pseudomonas phage JBD18, complete genome	GTTCACTGCCGTGTAGGCAGCTAAGAAA	Pseudomonas phage JBD18, complete genome	0511A0202	20	GTGGGTGCAAATCGCGATTCTGGTCGCGTCGT	5	A	0511A0202_Pseudomonas_aeruginosa_66_19
0511A0202_scaffold_91|CRISPR|1|spacer|7of20| id=20789538 [location: 21419..21450 of 68232; DR: GTTCACTGCCGTGTAGGCAGCTAAGAAA]	32	gi|348031532|dbj|AP012280.1| Pseudomonas aeruginosa NCGM2.S1 DNA, complete genome	5302740	5302771	0	0511A0202_scaffold_91	Pseudomonas aeruginosa NCGM2.S1 DNA, complete genome	GTTCACTGCCGTGTAGGCAGCTAAGAAA	Pseudomonas aeruginosa NCGM2.S1 DNA, complete genome	0511A0202	20	GTGGGTGCAAATCGCGATTCTGGTCGCGTCGT	5	A	0511A0202_Pseudomonas_aeruginosa_66_19
0511A0202_scaffold_91|CRISPR|1|spacer|7of20| id=20789538 [location: 21419..21450 of 68232; DR: GTTCACTGCCGTGTAGGCAGCTAAGAAA]	32	gi|187939575|gb|EU595738.1| Pseudomonas aeruginosa strain PACS458 clone fa1368, complete sequence	7701	7670	0	0511A0202_scaffold_91	Pseudomonas aeruginosa strain PACS458 clone fa1368, complete sequence	GTTCACTGCCGTGTAGGCAGCTAAGAAA	Pseudomonas aeruginosa strain PACS458 clone fa1368, complete sequence	0511A0202	20	GTGGGTGCAAATCGCGATTCTGGTCGCGTCGT	5	A	0511A0202_Pseudomonas_aeruginosa_66_19
0511A0202_scaffold_91|CRISPR|1|spacer|7of20| id=20789538 [location: 21419..21450 of 68232; DR: GTTCACTGCCGTGTAGGCAGCTAAGAAA]	32	gi|33338594|gb|AF232233.1| Bacteriophage B3, complete genome	34600	34631	0	0511A0202_scaffold_91	Bacteriophage B3, complete genome	GTTCACTGCCGTGTAGGCAGCTAAGAAA	Bacteriophage B3, complete genome	0511A0202	20	GTGGGTGCAAATCGCGATTCTGGTCGCGTCGT	5	A	0511A0202_Pseudomonas_aeruginosa_66_19
0511A0202_scaffold_91|CRISPR|1|spacer|7of20| id=20789538 [location: 21419..21450 of 68232; DR: GTTCACTGCCGTGTAGGCAGCTAAGAAA]	32	gi|953264201|emb|LN898172.1| Pseudomonas phage vB_PaeS_PM105	35184	35215	1	0511A0202_scaffold_91	Pseudomonas phage vB_PaeS_PM105	GTTCACTGCCGTGTAGGCAGCTAAGAAA	Pseudomonas phage vB_PaeS_PM105	0511A0202	20	GTGGGTGCAAATCGCGATTCTGGTCGCGTCGT	5	A	0511A0202_Pseudomonas_aeruginosa_66_19
0511A0202_scaffold_91|CRISPR|1|spacer|7of20| id=20789538 [location: 21419..21450 of 68232; DR: GTTCACTGCCGTGTAGGCAGCTAAGAAA]	32	gi|817624209|gb|CP011369.1| Pseudomonas aeruginosa strain S04 90 genome	1364683	1364714	1	0511A0202_scaffold_91	Pseudomonas aeruginosa strain S04 90 genome	GTTCACTGCCGTGTAGGCAGCTAAGAAA	Pseudomonas aeruginosa strain S04 90 genome	0511A0202	20	GTGGGTGCAAATCGCGATTCTGGTCGCGTCGT	5	A	0511A0202_Pseudomonas_aeruginosa_66_19
0511A0202_scaffold_91|CRISPR|1|spacer|7of20| id=20789538 [location: 21419..21450 of 68232; DR: GTTCACTGCCGTGTAGGCAGCTAAGAAA]	32	gi|815968487|gb|CP011317.1| Pseudomonas aeruginosa strain Carb01 63, complete genome	2575209	2575178	1	0511A0202_scaffold_91	Pseudomonas aeruginosa strain Carb01 63, complete genome	GTTCACTGCCGTGTAGGCAGCTAAGAAA	Pseudomonas aeruginosa strain Carb01 63, complete genome	0511A0202	20	GTGGGTGCAAATCGCGATTCTGGTCGCGTCGT	5	A	0511A0202_Pseudomonas_aeruginosa_66_19
0511A0202_scaffold_91|CRISPR|1|spacer|9of20| id=20789538 [location: 21539..21570 of 68232; DR: GTTCACTGCCGTGTAGGCAGCTAAGAAA]	32	gi|970332569|gb|CP013696.1| Pseudomonas aeruginosa strain 12-4-4(59), complete genome	4730630	4730661	0	0511A0202_scaffold_91	Pseudomonas aeruginosa strain 12-4-4(59), complete genome	GTTCACTGCCGTGTAGGCAGCTAAGAAA	Pseudomonas aeruginosa strain 12-4-4(59), complete genome	0511A0202	20	AAGCCGGGCCGATGTTCGAGCCTGGCTGCGTG	5	A	0511A0202_Pseudomonas_aeruginosa_66_19
0511A0202_scaffold_91|CRISPR|1|spacer|9of20| id=20789538 [location: 21539..21570 of 68232; DR: GTTCACTGCCGTGTAGGCAGCTAAGAAA]	32	gi|970332569|gb|CP013696.1| Pseudomonas aeruginosa strain 12-4-4(59), complete genome	4737698	4737729	0	0511A0202_scaffold_91	Pseudomonas aeruginosa strain 12-4-4(59), complete genome	GTTCACTGCCGTGTAGGCAGCTAAGAAA	Pseudomonas aeruginosa strain 12-4-4(59), complete genome	0511A0202	20	AAGCCGGGCCGATGTTCGAGCCTGGCTGCGTG	5	A	0511A0202_Pseudomonas_aeruginosa_66_19
0511A0202_scaffold_91|CRISPR|1|spacer|9of20| id=20789538 [location: 21539..21570 of 68232; DR: GTTCACTGCCGTGTAGGCAGCTAAGAAA]	32	gi|187939966|gb|EU595748.1| Pseudomonas aeruginosa strain PACS171b clone fa1386, complete sequence	35462	35431	0	0511A0202_scaffold_91	Pseudomonas aeruginosa strain PACS171b clone fa1386, complete sequence	GTTCACTGCCGTGTAGGCAGCTAAGAAA	Pseudomonas aeruginosa strain PACS171b clone fa1386, complete sequence	0511A0202	20	AAGCCGGGCCGATGTTCGAGCCTGGCTGCGTG	5	A	0511A0202_Pseudomonas_aeruginosa_66_19
0511A0202_scaffold_91|CRISPR|1|spacer|9of20| id=20789538 [location: 21539..21570 of 68232; DR: GTTCACTGCCGTGTAGGCAGCTAAGAAA]	32	gi|187939966|gb|EU595748.1| Pseudomonas aeruginosa strain PACS171b clone fa1386, complete sequence	42457	42426	0	0511A0202_scaffold_91	Pseudomonas aeruginosa strain PACS171b clone fa1386, complete sequence	GTTCACTGCCGTGTAGGCAGCTAAGAAA	Pseudomonas aeruginosa strain PACS171b clone fa1386, complete sequence	0511A0202	20	AAGCCGGGCCGATGTTCGAGCCTGGCTGCGTG	5	A	0511A0202_Pseudomonas_aeruginosa_66_19
0511A0202_scaffold_91|CRISPR|1|spacer|10of20| id=20789538 [location: 21599..21630 of 68232; DR: GTTCACTGCCGTGTAGGCAGCTAAGAAA]	32	gi|970332569|gb|CP013696.1| Pseudomonas aeruginosa strain 12-4-4(59), complete genome	4728682	4728713	0	0511A0202_scaffold_91	Pseudomonas aeruginosa strain 12-4-4(59), complete genome	GTTCACTGCCGTGTAGGCAGCTAAGAAA	Pseudomonas aeruginosa strain 12-4-4(59), complete genome	0511A0202	20	TGGACAATGCGCAGCCCAGGCGCTGGATTTAC	5	A	0511A0202_Pseudomonas_aeruginosa_66_19
0511A0202_scaffold_91|CRISPR|1|spacer|10of20| id=20789538 [location: 21599..21630 of 68232; DR: GTTCACTGCCGTGTAGGCAGCTAAGAAA]	32	gi|970332569|gb|CP013696.1| Pseudomonas aeruginosa strain 12-4-4(59), complete genome	4735750	4735781	0	0511A0202_scaffold_91	Pseudomonas aeruginosa strain 12-4-4(59), complete genome	GTTCACTGCCGTGTAGGCAGCTAAGAAA	Pseudomonas aeruginosa strain 12-4-4(59), complete genome	0511A0202	20	TGGACAATGCGCAGCCCAGGCGCTGGATTTAC	5	A	0511A0202_Pseudomonas_aeruginosa_66_19
0511A0202_scaffold_91|CRISPR|1|spacer|10of20| id=20789538 [location: 21599..21630 of 68232; DR: GTTCACTGCCGTGTAGGCAGCTAAGAAA]	32	gi|610413304|gb|CP007224.1| Pseudomonas aeruginosa PA96 genome	3069370	3069401	0	0511A0202_scaffold_91	Pseudomonas aeruginosa PA96 genome	GTTCACTGCCGTGTAGGCAGCTAAGAAA	Pseudomonas aeruginosa PA96 genome	0511A0202	20	TGGACAATGCGCAGCCCAGGCGCTGGATTTAC	5	A	0511A0202_Pseudomonas_aeruginosa_66_19
0511A0202_scaffold_91|CRISPR|1|spacer|10of20| id=20789538 [location: 21599..21630 of 68232; DR: GTTCACTGCCGTGTAGGCAGCTAAGAAA]	32	gi|610413304|gb|CP007224.1| Pseudomonas aeruginosa PA96 genome	3076700	3076731	0	0511A0202_scaffold_91	Pseudomonas aeruginosa PA96 genome	GTTCACTGCCGTGTAGGCAGCTAAGAAA	Pseudomonas aeruginosa PA96 genome	0511A0202	20	TGGACAATGCGCAGCCCAGGCGCTGGATTTAC	5	A	0511A0202_Pseudomonas_aeruginosa_66_19
0511A0202_scaffold_91|CRISPR|1|spacer|10of20| id=20789538 [location: 21599..21630 of 68232; DR: GTTCACTGCCGTGTAGGCAGCTAAGAAA]	32	gi|610413304|gb|CP007224.1| Pseudomonas aeruginosa PA96 genome	3084030	3084061	0	0511A0202_scaffold_91	Pseudomonas aeruginosa PA96 genome	GTTCACTGCCGTGTAGGCAGCTAAGAAA	Pseudomonas aeruginosa PA96 genome	0511A0202	20	TGGACAATGCGCAGCCCAGGCGCTGGATTTAC	5	A	0511A0202_Pseudomonas_aeruginosa_66_19
0511A0202_scaffold_91|CRISPR|1|spacer|10of20| id=20789538 [location: 21599..21630 of 68232; DR: GTTCACTGCCGTGTAGGCAGCTAAGAAA]	32	gi|187939966|gb|EU595748.1| Pseudomonas aeruginosa strain PACS171b clone fa1386, complete sequence	37410	37379	0	0511A0202_scaffold_91	Pseudomonas aeruginosa strain PACS171b clone fa1386, complete sequence	GTTCACTGCCGTGTAGGCAGCTAAGAAA	Pseudomonas aeruginosa strain PACS171b clone fa1386, complete sequence	0511A0202	20	TGGACAATGCGCAGCCCAGGCGCTGGATTTAC	5	A	0511A0202_Pseudomonas_aeruginosa_66_19
0511A0202_scaffold_91|CRISPR|1|spacer|10of20| id=20789538 [location: 21599..21630 of 68232; DR: GTTCACTGCCGTGTAGGCAGCTAAGAAA]	32	gi|187939966|gb|EU595748.1| Pseudomonas aeruginosa strain PACS171b clone fa1386, complete sequence	44609	44578	0	0511A0202_scaffold_91	Pseudomonas aeruginosa strain PACS171b clone fa1386, complete sequence	GTTCACTGCCGTGTAGGCAGCTAAGAAA	Pseudomonas aeruginosa strain PACS171b clone fa1386, complete sequence	0511A0202	20	TGGACAATGCGCAGCCCAGGCGCTGGATTTAC	5	A	0511A0202_Pseudomonas_aeruginosa_66_19
0511A0202_scaffold_91|CRISPR|1|spacer|10of20| id=20789538 [location: 21599..21630 of 68232; DR: GTTCACTGCCGTGTAGGCAGCTAAGAAA]	32	gi|3237270|gb|L06240.1|PSEPYOCIN Pseudomonas aeruginosa pyocin gene fragment	7378	7409	1	0511A0202_scaffold_91	PSEPYOCIN Pseudomonas aeruginosa pyocin gene fragment	GTTCACTGCCGTGTAGGCAGCTAAGAAA	PSEPYOCIN Pseudomonas aeruginosa pyocin gene fragment	0511A0202	20	TGGACAATGCGCAGCCCAGGCGCTGGATTTAC	5	A	0511A0202_Pseudomonas_aeruginosa_66_19
0511A0202_scaffold_91|CRISPR|1|spacer|12of20| id=20789538 [location: 21719..21750 of 68232; DR: GTTCACTGCCGTGTAGGCAGCTAAGAAA]	32	gi|585865399|emb|HG798806.1| Pseudomonas phage vB_PaeP_Tr60_Ab31	2131	2162	1	0511A0202_scaffold_91	Pseudomonas phage vB_PaeP_Tr60_Ab31	GTTCACTGCCGTGTAGGCAGCTAAGAAA	Pseudomonas phage vB_PaeP_Tr60_Ab31	0511A0202	20	GTGCGCGGATGGCTGGTATCTCGAGCACGATT	5	A	0511A0202_Pseudomonas_aeruginosa_66_19
0511A0202_scaffold_91|CRISPR|1|spacer|13of20| id=20789538 [location: 21779..21810 of 68232; DR: GTTCACTGCCGTGTAGGCAGCTAAGAAA]	32	gi|970332569|gb|CP013696.1| Pseudomonas aeruginosa strain 12-4-4(59), complete genome	3095807	3095838	1	0511A0202_scaffold_91	Pseudomonas aeruginosa strain 12-4-4(59), complete genome	GTTCACTGCCGTGTAGGCAGCTAAGAAA	Pseudomonas aeruginosa strain 12-4-4(59), complete genome	0511A0202	20	AGGCAAACAACGGAAAGATCACCACCGAAGGC	5	A	0511A0202_Pseudomonas_aeruginosa_66_19
0511A0202_scaffold_91|CRISPR|1|spacer|15of20| id=20789538 [location: 21899..21930 of 68232; DR: GTTCACTGCCGTGTAGGCAGCTAAGAAA]	32	gi|970332569|gb|CP013696.1| Pseudomonas aeruginosa strain 12-4-4(59), complete genome	3109941	3109972	0	0511A0202_scaffold_91	Pseudomonas aeruginosa strain 12-4-4(59), complete genome	GTTCACTGCCGTGTAGGCAGCTAAGAAA	Pseudomonas aeruginosa strain 12-4-4(59), complete genome	0511A0202	20	ACAAGACGCTCATCGACGGCAGCATCGAGACG	5	A	0511A0202_Pseudomonas_aeruginosa_66_19
0511A0202_scaffold_91|CRISPR|1|spacer|15of20| id=20789538 [location: 21899..21930 of 68232; DR: GTTCACTGCCGTGTAGGCAGCTAAGAAA]	32	gi|563408818|gb|CP006853.1| Pseudomonas aeruginosa MTB-1, complete genome	3399890	3399859	0	0511A0202_scaffold_91	Pseudomonas aeruginosa MTB-1, complete genome	GTTCACTGCCGTGTAGGCAGCTAAGAAA	Pseudomonas aeruginosa MTB-1, complete genome	0511A0202	20	ACAAGACGCTCATCGACGGCAGCATCGAGACG	5	A	0511A0202_Pseudomonas_aeruginosa_66_19
0511A0202_scaffold_91|CRISPR|1|spacer|15of20| id=20789538 [location: 21899..21930 of 68232; DR: GTTCACTGCCGTGTAGGCAGCTAAGAAA]	32	gi|209528692|dbj|AP009624.1| Pseudomonas phage PAJU2 DNA, complete genome	5771	5802	0	0511A0202_scaffold_91	Pseudomonas phage PAJU2 DNA, complete genome	GTTCACTGCCGTGTAGGCAGCTAAGAAA	Pseudomonas phage PAJU2 DNA, complete genome	0511A0202	20	ACAAGACGCTCATCGACGGCAGCATCGAGACG	5	A	0511A0202_Pseudomonas_aeruginosa_66_19
0511A0202_scaffold_91|CRISPR|1|spacer|16of20| id=20789538 [location: 21959..21990 of 68232; DR: GTTCACTGCCGTGTAGGCAGCTAAGAAA]	32	gi|954540432|gb|KT968832.1| Pseudomonas phage YMC11/11/R1836, complete genome	7910	7879	0	0511A0202_scaffold_91	Pseudomonas phage YMC11/11/R1836, complete genome	GTTCACTGCCGTGTAGGCAGCTAAGAAA	Pseudomonas phage YMC11/11/R1836, complete genome	0511A0202	20	AAGGTGACGATGCACAGCTGTTGCGCGCGGTT	5	A	0511A0202_Pseudomonas_aeruginosa_66_19
0511A0202_scaffold_91|CRISPR|1|spacer|16of20| id=20789538 [location: 21959..21990 of 68232; DR: GTTCACTGCCGTGTAGGCAGCTAAGAAA]	32	gi|817624209|gb|CP011369.1| Pseudomonas aeruginosa strain S04 90 genome	5624957	5624988	0	0511A0202_scaffold_91	Pseudomonas aeruginosa strain S04 90 genome	GTTCACTGCCGTGTAGGCAGCTAAGAAA	Pseudomonas aeruginosa strain S04 90 genome	0511A0202	20	AAGGTGACGATGCACAGCTGTTGCGCGCGGTT	5	A	0511A0202_Pseudomonas_aeruginosa_66_19
0511A0202_scaffold_91|CRISPR|1|spacer|16of20| id=20789538 [location: 21959..21990 of 68232; DR: GTTCACTGCCGTGTAGGCAGCTAAGAAA]	32	gi|815968487|gb|CP011317.1| Pseudomonas aeruginosa strain Carb01 63, complete genome	923061	923030	0	0511A0202_scaffold_91	Pseudomonas aeruginosa strain Carb01 63, complete genome	GTTCACTGCCGTGTAGGCAGCTAAGAAA	Pseudomonas aeruginosa strain Carb01 63, complete genome	0511A0202	20	AAGGTGACGATGCACAGCTGTTGCGCGCGGTT	5	A	0511A0202_Pseudomonas_aeruginosa_66_19
0511A0202_scaffold_91|CRISPR|1|spacer|16of20| id=20789538 [location: 21959..21990 of 68232; DR: GTTCACTGCCGTGTAGGCAGCTAAGAAA]	32	gi|815968487|gb|CP011317.1| Pseudomonas aeruginosa strain Carb01 63, complete genome	1427171	1427202	0	0511A0202_scaffold_91	Pseudomonas aeruginosa strain Carb01 63, complete genome	GTTCACTGCCGTGTAGGCAGCTAAGAAA	Pseudomonas aeruginosa strain Carb01 63, complete genome	0511A0202	20	AAGGTGACGATGCACAGCTGTTGCGCGCGGTT	5	A	0511A0202_Pseudomonas_aeruginosa_66_19
0511A0202_scaffold_91|CRISPR|1|spacer|16of20| id=20789538 [location: 21959..21990 of 68232; DR: GTTCACTGCCGTGTAGGCAGCTAAGAAA]	32	gi|676401836|gb|KM233689.1| Pseudomonas phage H70, complete genome	8209	8178	0	0511A0202_scaffold_91	Pseudomonas phage H70, complete genome	GTTCACTGCCGTGTAGGCAGCTAAGAAA	Pseudomonas phage H70, complete genome	0511A0202	20	AAGGTGACGATGCACAGCTGTTGCGCGCGGTT	5	A	0511A0202_Pseudomonas_aeruginosa_66_19
0511A0202_scaffold_91|CRISPR|1|spacer|16of20| id=20789538 [location: 21959..21990 of 68232; DR: GTTCACTGCCGTGTAGGCAGCTAAGAAA]	32	gi|713665761|emb|LN610590.1| Pseudomonas phage vB_PaeS_PAO1_Ab30, complete genome	8288	8257	0	0511A0202_scaffold_91	Pseudomonas phage vB_PaeS_PAO1_Ab30, complete genome	GTTCACTGCCGTGTAGGCAGCTAAGAAA	Pseudomonas phage vB_PaeS_PAO1_Ab30, complete genome	0511A0202	20	AAGGTGACGATGCACAGCTGTTGCGCGCGGTT	5	A	0511A0202_Pseudomonas_aeruginosa_66_19
0511A0202_scaffold_91|CRISPR|1|spacer|16of20| id=20789538 [location: 21959..21990 of 68232; DR: GTTCACTGCCGTGTAGGCAGCTAAGAAA]	32	gi|555923459|gb|KF475786.1| Pseudomonas phage MP48, complete genome	7775	7744	0	0511A0202_scaffold_91	Pseudomonas phage MP48, complete genome	GTTCACTGCCGTGTAGGCAGCTAAGAAA	Pseudomonas phage MP48, complete genome	0511A0202	20	AAGGTGACGATGCACAGCTGTTGCGCGCGGTT	5	A	0511A0202_Pseudomonas_aeruginosa_66_19
0511A0202_scaffold_91|CRISPR|1|spacer|16of20| id=20789538 [location: 21959..21990 of 68232; DR: GTTCACTGCCGTGTAGGCAGCTAAGAAA]	32	gi|604671186|gb|KJ477077.1| Pseudomonas phage JD024, complete genome	7270	7239	0	0511A0202_scaffold_91	Pseudomonas phage JD024, complete genome	GTTCACTGCCGTGTAGGCAGCTAAGAAA	Pseudomonas phage JD024, complete genome	0511A0202	20	AAGGTGACGATGCACAGCTGTTGCGCGCGGTT	5	A	0511A0202_Pseudomonas_aeruginosa_66_19
0511A0202_scaffold_91|CRISPR|1|spacer|16of20| id=20789538 [location: 21959..21990 of 68232; DR: GTTCACTGCCGTGTAGGCAGCTAAGAAA]	32	gi|401824098|gb|JX434033.1| Pseudomonas phage JBD88a, complete genome	7273	7242	0	0511A0202_scaffold_91	Pseudomonas phage JBD88a, complete genome	GTTCACTGCCGTGTAGGCAGCTAAGAAA	Pseudomonas phage JBD88a, complete genome	0511A0202	20	AAGGTGACGATGCACAGCTGTTGCGCGCGGTT	5	A	0511A0202_Pseudomonas_aeruginosa_66_19
0511A0202_scaffold_91|CRISPR|1|spacer|16of20| id=20789538 [location: 21959..21990 of 68232; DR: GTTCACTGCCGTGTAGGCAGCTAAGAAA]	32	gi|401824041|gb|JX434032.1| Pseudomonas phage JBD30, complete genome	8363	8332	0	0511A0202_scaffold_91	Pseudomonas phage JBD30, complete genome	GTTCACTGCCGTGTAGGCAGCTAAGAAA	Pseudomonas phage JBD30, complete genome	0511A0202	20	AAGGTGACGATGCACAGCTGTTGCGCGCGGTT	5	A	0511A0202_Pseudomonas_aeruginosa_66_19
0511A0202_scaffold_91|CRISPR|1|spacer|16of20| id=20789538 [location: 21959..21990 of 68232; DR: GTTCACTGCCGTGTAGGCAGCTAAGAAA]	32	gi|401823982|gb|JX434031.1| Pseudomonas phage JBD24, complete genome	7445	7414	0	0511A0202_scaffold_91	Pseudomonas phage JBD24, complete genome	GTTCACTGCCGTGTAGGCAGCTAAGAAA	Pseudomonas phage JBD24, complete genome	0511A0202	20	AAGGTGACGATGCACAGCTGTTGCGCGCGGTT	5	A	0511A0202_Pseudomonas_aeruginosa_66_19
0511A0202_scaffold_91|CRISPR|1|spacer|16of20| id=20789538 [location: 21959..21990 of 68232; DR: GTTCACTGCCGTGTAGGCAGCTAAGAAA]	32	gi|380851590|gb|JQ762257.1| Pseudomonas phage MP42, complete genome	8325	8294	0	0511A0202_scaffold_91	Pseudomonas phage MP42, complete genome	GTTCACTGCCGTGTAGGCAGCTAAGAAA	Pseudomonas phage MP42, complete genome	0511A0202	20	AAGGTGACGATGCACAGCTGTTGCGCGCGGTT	5	A	0511A0202_Pseudomonas_aeruginosa_66_19
0511A0202_scaffold_91|CRISPR|1|spacer|16of20| id=20789538 [location: 21959..21990 of 68232; DR: GTTCACTGCCGTGTAGGCAGCTAAGAAA]	32	gi|374112630|gb|JN811560.1| Pseudomonas phage JBD26, complete genome	8409	8378	0	0511A0202_scaffold_91	Pseudomonas phage JBD26, complete genome	GTTCACTGCCGTGTAGGCAGCTAAGAAA	Pseudomonas phage JBD26, complete genome	0511A0202	20	AAGGTGACGATGCACAGCTGTTGCGCGCGGTT	5	A	0511A0202_Pseudomonas_aeruginosa_66_19
0511A0202_scaffold_91|CRISPR|1|spacer|16of20| id=20789538 [location: 21959..21990 of 68232; DR: GTTCACTGCCGTGTAGGCAGCTAAGAAA]	32	gi|371779606|emb|HE584812.1| Pseudomonas phage LPB1, complate genome	7234	7203	0	0511A0202_scaffold_91	Pseudomonas phage LPB1, complate genome	GTTCACTGCCGTGTAGGCAGCTAAGAAA	Pseudomonas phage LPB1, complate genome	0511A0202	20	AAGGTGACGATGCACAGCTGTTGCGCGCGGTT	5	A	0511A0202_Pseudomonas_aeruginosa_66_19
0511A0202_scaffold_91|CRISPR|1|spacer|16of20| id=20789538 [location: 21959..21990 of 68232; DR: GTTCACTGCCGTGTAGGCAGCTAAGAAA]	32	gi|348031532|dbj|AP012280.1| Pseudomonas aeruginosa NCGM2.S1 DNA, complete genome	5824069	5824100	0	0511A0202_scaffold_91	Pseudomonas aeruginosa NCGM2.S1 DNA, complete genome	GTTCACTGCCGTGTAGGCAGCTAAGAAA	Pseudomonas aeruginosa NCGM2.S1 DNA, complete genome	0511A0202	20	AAGGTGACGATGCACAGCTGTTGCGCGCGGTT	5	A	0511A0202_Pseudomonas_aeruginosa_66_19
0511A0202_scaffold_91|CRISPR|1|spacer|16of20| id=20789538 [location: 21959..21990 of 68232; DR: GTTCACTGCCGTGTAGGCAGCTAAGAAA]	32	gi|315418954|gb|HM624080.1| Pseudomonas phage PA1/KOR/2010, complete genome	5161	5130	0	0511A0202_scaffold_91	Pseudomonas phage PA1/KOR/2010, complete genome	GTTCACTGCCGTGTAGGCAGCTAAGAAA	Pseudomonas phage PA1/KOR/2010, complete genome	0511A0202	20	AAGGTGACGATGCACAGCTGTTGCGCGCGGTT	5	A	0511A0202_Pseudomonas_aeruginosa_66_19
0511A0202_scaffold_91|CRISPR|1|spacer|16of20| id=20789538 [location: 21959..21990 of 68232; DR: GTTCACTGCCGTGTAGGCAGCTAAGAAA]	32	gi|169409292|gb|EU272037.1| Pseudomonas phage MP38, complete genome	8417	8386	0	0511A0202_scaffold_91	Pseudomonas phage MP38, complete genome	GTTCACTGCCGTGTAGGCAGCTAAGAAA	Pseudomonas phage MP38, complete genome	0511A0202	20	AAGGTGACGATGCACAGCTGTTGCGCGCGGTT	5	A	0511A0202_Pseudomonas_aeruginosa_66_19
0511A0202_scaffold_91|CRISPR|1|spacer|16of20| id=20789538 [location: 21959..21990 of 68232; DR: GTTCACTGCCGTGTAGGCAGCTAAGAAA]	32	gi|169409240|gb|EU272036.1| Pseudomonas phage MP29, complete genome	7775	7744	0	0511A0202_scaffold_91	Pseudomonas phage MP29, complete genome	GTTCACTGCCGTGTAGGCAGCTAAGAAA	Pseudomonas phage MP29, complete genome	0511A0202	20	AAGGTGACGATGCACAGCTGTTGCGCGCGGTT	5	A	0511A0202_Pseudomonas_aeruginosa_66_19
0511A0202_scaffold_91|CRISPR|1|spacer|16of20| id=20789538 [location: 21959..21990 of 68232; DR: GTTCACTGCCGTGTAGGCAGCTAAGAAA]	32	gi|111433558|gb|DQ873690.1| Phage MP22, complete genome	7285	7254	0	0511A0202_scaffold_91	Phage MP22, complete genome	GTTCACTGCCGTGTAGGCAGCTAAGAAA	Phage MP22, complete genome	0511A0202	20	AAGGTGACGATGCACAGCTGTTGCGCGCGGTT	5	A	0511A0202_Pseudomonas_aeruginosa_66_19
0511A0202_scaffold_91|CRISPR|1|spacer|16of20| id=20789538 [location: 21959..21990 of 68232; DR: GTTCACTGCCGTGTAGGCAGCTAAGAAA]	32	gi|37595163|gb|AY394005.1| Bacteriophage D3112, complete genome	8409	8378	0	0511A0202_scaffold_91	Bacteriophage D3112, complete genome	GTTCACTGCCGTGTAGGCAGCTAAGAAA	Bacteriophage D3112, complete genome	0511A0202	20	AAGGTGACGATGCACAGCTGTTGCGCGCGGTT	5	A	0511A0202_Pseudomonas_aeruginosa_66_19
0511A0202_scaffold_91|CRISPR|1|spacer|19of20| id=20789538 [location: 22139..22170 of 68232; DR: GTTCACTGCCGTGTAGGCAGCTAAGAAA]	32	gi|817624209|gb|CP011369.1| Pseudomonas aeruginosa strain S04 90 genome	5620200	5620231	0	0511A0202_scaffold_91	Pseudomonas aeruginosa strain S04 90 genome	GTTCACTGCCGTGTAGGCAGCTAAGAAA	Pseudomonas aeruginosa strain S04 90 genome	0511A0202	20	TTCACGGCGGGCTTGATGTCCGCGTCTACCTG	5	A	0511A0202_Pseudomonas_aeruginosa_66_19
0511A0202_scaffold_91|CRISPR|1|spacer|19of20| id=20789538 [location: 22139..22170 of 68232; DR: GTTCACTGCCGTGTAGGCAGCTAAGAAA]	32	gi|817624209|gb|CP011369.1| Pseudomonas aeruginosa strain S04 90 genome	6231920	6231951	1	0511A0202_scaffold_91	Pseudomonas aeruginosa strain S04 90 genome	GTTCACTGCCGTGTAGGCAGCTAAGAAA	Pseudomonas aeruginosa strain S04 90 genome	0511A0202	20	TTCACGGCGGGCTTGATGTCCGCGTCTACCTG	5	A	0511A0202_Pseudomonas_aeruginosa_66_19
0511A0202_scaffold_91|CRISPR|1|spacer|19of20| id=20789538 [location: 22139..22170 of 68232; DR: GTTCACTGCCGTGTAGGCAGCTAAGAAA]	32	gi|676401836|gb|KM233689.1| Pseudomonas phage H70, complete genome	12966	12935	0	0511A0202_scaffold_91	Pseudomonas phage H70, complete genome	GTTCACTGCCGTGTAGGCAGCTAAGAAA	Pseudomonas phage H70, complete genome	0511A0202	20	TTCACGGCGGGCTTGATGTCCGCGTCTACCTG	5	A	0511A0202_Pseudomonas_aeruginosa_66_19
0511A0202_scaffold_91|CRISPR|1|spacer|19of20| id=20789538 [location: 22139..22170 of 68232; DR: GTTCACTGCCGTGTAGGCAGCTAAGAAA]	32	gi|669258221|gb|JQ067085.2| Pseudomonas phage PaMx73, complete genome	11880	11849	0	0511A0202_scaffold_91	Pseudomonas phage PaMx73, complete genome	GTTCACTGCCGTGTAGGCAGCTAAGAAA	Pseudomonas phage PaMx73, complete genome	0511A0202	20	TTCACGGCGGGCTTGATGTCCGCGTCTACCTG	5	A	0511A0202_Pseudomonas_aeruginosa_66_19
0511A0202_scaffold_91|CRISPR|1|spacer|19of20| id=20789538 [location: 22139..22170 of 68232; DR: GTTCACTGCCGTGTAGGCAGCTAAGAAA]	32	gi|401824098|gb|JX434033.1| Pseudomonas phage JBD88a, complete genome	12031	12000	0	0511A0202_scaffold_91	Pseudomonas phage JBD88a, complete genome	GTTCACTGCCGTGTAGGCAGCTAAGAAA	Pseudomonas phage JBD88a, complete genome	0511A0202	20	TTCACGGCGGGCTTGATGTCCGCGTCTACCTG	5	A	0511A0202_Pseudomonas_aeruginosa_66_19
0511A0202_scaffold_91|CRISPR|1|spacer|19of20| id=20789538 [location: 22139..22170 of 68232; DR: GTTCACTGCCGTGTAGGCAGCTAAGAAA]	32	gi|401824041|gb|JX434032.1| Pseudomonas phage JBD30, complete genome	12996	12965	0	0511A0202_scaffold_91	Pseudomonas phage JBD30, complete genome	GTTCACTGCCGTGTAGGCAGCTAAGAAA	Pseudomonas phage JBD30, complete genome	0511A0202	20	TTCACGGCGGGCTTGATGTCCGCGTCTACCTG	5	A	0511A0202_Pseudomonas_aeruginosa_66_19
0511A0202_scaffold_91|CRISPR|1|spacer|19of20| id=20789538 [location: 22139..22170 of 68232; DR: GTTCACTGCCGTGTAGGCAGCTAAGAAA]	32	gi|380851590|gb|JQ762257.1| Pseudomonas phage MP42, complete genome	12957	12926	0	0511A0202_scaffold_91	Pseudomonas phage MP42, complete genome	GTTCACTGCCGTGTAGGCAGCTAAGAAA	Pseudomonas phage MP42, complete genome	0511A0202	20	TTCACGGCGGGCTTGATGTCCGCGTCTACCTG	5	A	0511A0202_Pseudomonas_aeruginosa_66_19
0511A0202_scaffold_91|CRISPR|1|spacer|19of20| id=20789538 [location: 22139..22170 of 68232; DR: GTTCACTGCCGTGTAGGCAGCTAAGAAA]	32	gi|374112630|gb|JN811560.1| Pseudomonas phage JBD26, complete genome	13166	13135	0	0511A0202_scaffold_91	Pseudomonas phage JBD26, complete genome	GTTCACTGCCGTGTAGGCAGCTAAGAAA	Pseudomonas phage JBD26, complete genome	0511A0202	20	TTCACGGCGGGCTTGATGTCCGCGTCTACCTG	5	A	0511A0202_Pseudomonas_aeruginosa_66_19
0511A0202_scaffold_91|CRISPR|1|spacer|19of20| id=20789538 [location: 22139..22170 of 68232; DR: GTTCACTGCCGTGTAGGCAGCTAAGAAA]	32	gi|371779606|emb|HE584812.1| Pseudomonas phage LPB1, complate genome	12412	12381	0	0511A0202_scaffold_91	Pseudomonas phage LPB1, complate genome	GTTCACTGCCGTGTAGGCAGCTAAGAAA	Pseudomonas phage LPB1, complate genome	0511A0202	20	TTCACGGCGGGCTTGATGTCCGCGTCTACCTG	5	A	0511A0202_Pseudomonas_aeruginosa_66_19
0511A0202_scaffold_91|CRISPR|1|spacer|19of20| id=20789538 [location: 22139..22170 of 68232; DR: GTTCACTGCCGTGTAGGCAGCTAAGAAA]	32	gi|348031532|dbj|AP012280.1| Pseudomonas aeruginosa NCGM2.S1 DNA, complete genome	5818931	5818962	0	0511A0202_scaffold_91	Pseudomonas aeruginosa NCGM2.S1 DNA, complete genome	GTTCACTGCCGTGTAGGCAGCTAAGAAA	Pseudomonas aeruginosa NCGM2.S1 DNA, complete genome	0511A0202	20	TTCACGGCGGGCTTGATGTCCGCGTCTACCTG	5	A	0511A0202_Pseudomonas_aeruginosa_66_19
0511A0202_scaffold_91|CRISPR|1|spacer|19of20| id=20789538 [location: 22139..22170 of 68232; DR: GTTCACTGCCGTGTAGGCAGCTAAGAAA]	32	gi|169409292|gb|EU272037.1| Pseudomonas phage MP38, complete genome	13173	13142	0	0511A0202_scaffold_91	Pseudomonas phage MP38, complete genome	GTTCACTGCCGTGTAGGCAGCTAAGAAA	Pseudomonas phage MP38, complete genome	0511A0202	20	TTCACGGCGGGCTTGATGTCCGCGTCTACCTG	5	A	0511A0202_Pseudomonas_aeruginosa_66_19
0511A0202_scaffold_91|CRISPR|1|spacer|19of20| id=20789538 [location: 22139..22170 of 68232; DR: GTTCACTGCCGTGTAGGCAGCTAAGAAA]	32	gi|111433558|gb|DQ873690.1| Phage MP22, complete genome	12042	12011	0	0511A0202_scaffold_91	Phage MP22, complete genome	GTTCACTGCCGTGTAGGCAGCTAAGAAA	Phage MP22, complete genome	0511A0202	20	TTCACGGCGGGCTTGATGTCCGCGTCTACCTG	5	A	0511A0202_Pseudomonas_aeruginosa_66_19
0511A0202_scaffold_91|CRISPR|1|spacer|19of20| id=20789538 [location: 22139..22170 of 68232; DR: GTTCACTGCCGTGTAGGCAGCTAAGAAA]	32	gi|110294443|gb|DQ631426.1| Pseudomonas phage DMS3, complete genome	12552	12521	0	0511A0202_scaffold_91	Pseudomonas phage DMS3, complete genome	GTTCACTGCCGTGTAGGCAGCTAAGAAA	Pseudomonas phage DMS3, complete genome	0511A0202	20	TTCACGGCGGGCTTGATGTCCGCGTCTACCTG	5	A	0511A0202_Pseudomonas_aeruginosa_66_19
0511A0202_scaffold_91|CRISPR|1|spacer|19of20| id=20789538 [location: 22139..22170 of 68232; DR: GTTCACTGCCGTGTAGGCAGCTAAGAAA]	32	gi|37595163|gb|AY394005.1| Bacteriophage D3112, complete genome	13042	13011	0	0511A0202_scaffold_91	Bacteriophage D3112, complete genome	GTTCACTGCCGTGTAGGCAGCTAAGAAA	Bacteriophage D3112, complete genome	0511A0202	20	TTCACGGCGGGCTTGATGTCCGCGTCTACCTG	5	A	0511A0202_Pseudomonas_aeruginosa_66_19
0511A0202_scaffold_91|CRISPR|1|spacer|19of20| id=20789538 [location: 22139..22170 of 68232; DR: GTTCACTGCCGTGTAGGCAGCTAAGAAA]	32	gi|815968487|gb|CP011317.1| Pseudomonas aeruginosa strain Carb01 63, complete genome	927818	927787	1	0511A0202_scaffold_91	Pseudomonas aeruginosa strain Carb01 63, complete genome	GTTCACTGCCGTGTAGGCAGCTAAGAAA	Pseudomonas aeruginosa strain Carb01 63, complete genome	0511A0202	20	TTCACGGCGGGCTTGATGTCCGCGTCTACCTG	5	A	0511A0202_Pseudomonas_aeruginosa_66_19
0511A0202_scaffold_91|CRISPR|1|spacer|19of20| id=20789538 [location: 22139..22170 of 68232; DR: GTTCACTGCCGTGTAGGCAGCTAAGAAA]	32	gi|815968487|gb|CP011317.1| Pseudomonas aeruginosa strain Carb01 63, complete genome	1148306	1148337	1	0511A0202_scaffold_91	Pseudomonas aeruginosa strain Carb01 63, complete genome	GTTCACTGCCGTGTAGGCAGCTAAGAAA	Pseudomonas aeruginosa strain Carb01 63, complete genome	0511A0202	20	TTCACGGCGGGCTTGATGTCCGCGTCTACCTG	5	A	0511A0202_Pseudomonas_aeruginosa_66_19
0511A0202_scaffold_91|CRISPR|1|spacer|19of20| id=20789538 [location: 22139..22170 of 68232; DR: GTTCACTGCCGTGTAGGCAGCTAAGAAA]	32	gi|815968487|gb|CP011317.1| Pseudomonas aeruginosa strain Carb01 63, complete genome	3591062	3591093	1	0511A0202_scaffold_91	Pseudomonas aeruginosa strain Carb01 63, complete genome	GTTCACTGCCGTGTAGGCAGCTAAGAAA	Pseudomonas aeruginosa strain Carb01 63, complete genome	0511A0202	20	TTCACGGCGGGCTTGATGTCCGCGTCTACCTG	5	A	0511A0202_Pseudomonas_aeruginosa_66_19
0511A0202_scaffold_91|CRISPR|1|spacer|19of20| id=20789538 [location: 22139..22170 of 68232; DR: GTTCACTGCCGTGTAGGCAGCTAAGAAA]	32	gi|713665761|emb|LN610590.1| Pseudomonas phage vB_PaeS_PAO1_Ab30, complete genome	13045	13014	1	0511A0202_scaffold_91	Pseudomonas phage vB_PaeS_PAO1_Ab30, complete genome	GTTCACTGCCGTGTAGGCAGCTAAGAAA	Pseudomonas phage vB_PaeS_PAO1_Ab30, complete genome	0511A0202	20	TTCACGGCGGGCTTGATGTCCGCGTCTACCTG	5	A	0511A0202_Pseudomonas_aeruginosa_66_19
0511A0202_scaffold_91|CRISPR|1|spacer|19of20| id=20789538 [location: 22139..22170 of 68232; DR: GTTCACTGCCGTGTAGGCAGCTAAGAAA]	32	gi|401823982|gb|JX434031.1| Pseudomonas phage JBD24, complete genome	12890	12859	1	0511A0202_scaffold_91	Pseudomonas phage JBD24, complete genome	GTTCACTGCCGTGTAGGCAGCTAAGAAA	Pseudomonas phage JBD24, complete genome	0511A0202	20	TTCACGGCGGGCTTGATGTCCGCGTCTACCTG	5	A	0511A0202_Pseudomonas_aeruginosa_66_19
0511A0202_scaffold_91|CRISPR|2|spacer|2of14| id=20789538 [location: 30876..30907 of 68232; DR: TTTCTTAGCTGCCTATACGGCAGTGAAC]	32	gi|927993303|gb|CP012679.1| Pseudomonas aeruginosa strain PA1RG, complete genome	1447580	1447549	0	0511A0202_scaffold_91	Pseudomonas aeruginosa strain PA1RG, complete genome	TTTCTTAGCTGCCTATACGGCAGTGAAC	Pseudomonas aeruginosa strain PA1RG, complete genome	0511A0202	14	GCGTCAGCTTACAACTGGCTCGGCGTAGCTAT	5	A	0511A0202_Pseudomonas_aeruginosa_66_19
0511A0202_scaffold_91|CRISPR|2|spacer|2of14| id=20789538 [location: 30876..30907 of 68232; DR: TTTCTTAGCTGCCTATACGGCAGTGAAC]	32	gi|927226644|gb|CP004054.2| Pseudomonas aeruginosa PA1, complete genome	1447581	1447550	0	0511A0202_scaffold_91	Pseudomonas aeruginosa PA1, complete genome	TTTCTTAGCTGCCTATACGGCAGTGAAC	Pseudomonas aeruginosa PA1, complete genome	0511A0202	14	GCGTCAGCTTACAACTGGCTCGGCGTAGCTAT	5	A	0511A0202_Pseudomonas_aeruginosa_66_19
0511A0202_scaffold_91|CRISPR|2|spacer|2of14| id=20789538 [location: 30876..30907 of 68232; DR: TTTCTTAGCTGCCTATACGGCAGTGAAC]	32	gi|557709751|gb|CP004055.1| Pseudomonas aeruginosa PA1R, complete genome	1711187	1711218	0	0511A0202_scaffold_91	Pseudomonas aeruginosa PA1R, complete genome	TTTCTTAGCTGCCTATACGGCAGTGAAC	Pseudomonas aeruginosa PA1R, complete genome	0511A0202	14	GCGTCAGCTTACAACTGGCTCGGCGTAGCTAT	5	A	0511A0202_Pseudomonas_aeruginosa_66_19
0511A0202_scaffold_91|CRISPR|2|spacer|2of14| id=20789538 [location: 30876..30907 of 68232; DR: TTTCTTAGCTGCCTATACGGCAGTGAAC]	32	gi|371767335|gb|HQ711985.1| Pseudomonas phage vB_PaeS_PMG1, complete genome	30609	30578	0	0511A0202_scaffold_91	Pseudomonas phage vB_PaeS_PMG1, complete genome	TTTCTTAGCTGCCTATACGGCAGTGAAC	Pseudomonas phage vB_PaeS_PMG1, complete genome	0511A0202	14	GCGTCAGCTTACAACTGGCTCGGCGTAGCTAT	5	A	0511A0202_Pseudomonas_aeruginosa_66_19
0511A0202_scaffold_91|CRISPR|2|spacer|2of14| id=20789538 [location: 30876..30907 of 68232; DR: TTTCTTAGCTGCCTATACGGCAGTGAAC]	32	gi|187940079|gb|EU595751.1| Pseudomonas aeruginosa strain PACS171b clone fa1390, complete sequence	42079	42110	0	0511A0202_scaffold_91	Pseudomonas aeruginosa strain PACS171b clone fa1390, complete sequence	TTTCTTAGCTGCCTATACGGCAGTGAAC	Pseudomonas aeruginosa strain PACS171b clone fa1390, complete sequence	0511A0202	14	GCGTCAGCTTACAACTGGCTCGGCGTAGCTAT	5	A	0511A0202_Pseudomonas_aeruginosa_66_19
0511A0202_scaffold_91|CRISPR|2|spacer|5of14| id=20789538 [location: 31056..31087 of 68232; DR: TTTCTTAGCTGCCTATACGGCAGTGAAC]	32	gi|957647579|dbj|AP017302.1| Pseudomonas aeruginosa DNA, complete genome, strain: IOMTU 133	2646777	2646746	0	0511A0202_scaffold_91	Pseudomonas aeruginosa DNA, complete genome, strain: IOMTU 133	TTTCTTAGCTGCCTATACGGCAGTGAAC	Pseudomonas aeruginosa DNA, complete genome, strain: IOMTU 133	0511A0202	14	CCGCAGCAACGTCGGGAGCCGGGCCATGTTCT	5	A	0511A0202_Pseudomonas_aeruginosa_66_19
0511A0202_scaffold_91|CRISPR|2|spacer|5of14| id=20789538 [location: 31056..31087 of 68232; DR: TTTCTTAGCTGCCTATACGGCAGTGAAC]	32	gi|937559777|gb|KT454971.1| Pseudomonas aeruginosa strain CCBH4851 genomic sequence	237511	237542	0	0511A0202_scaffold_91	Pseudomonas aeruginosa strain CCBH4851 genomic sequence	TTTCTTAGCTGCCTATACGGCAGTGAAC	Pseudomonas aeruginosa strain CCBH4851 genomic sequence	0511A0202	14	CCGCAGCAACGTCGGGAGCCGGGCCATGTTCT	5	A	0511A0202_Pseudomonas_aeruginosa_66_19
0511A0202_scaffold_91|CRISPR|2|spacer|5of14| id=20789538 [location: 31056..31087 of 68232; DR: TTTCTTAGCTGCCTATACGGCAGTGAAC]	32	gi|187939710|gb|EU595742.1| Pseudomonas aeruginosa strain PACS458 clone fa1374, complete sequence	49935	49965	1	0511A0202_scaffold_91	Pseudomonas aeruginosa strain PACS458 clone fa1374, complete sequence	TTTCTTAGCTGCCTATACGGCAGTGAAC	Pseudomonas aeruginosa strain PACS458 clone fa1374, complete sequence	0511A0202	14	CCGCAGCAACGTCGGGAGCCGGGCCATGTTCT	5	A	0511A0202_Pseudomonas_aeruginosa_66_19
0511A0202_scaffold_91|CRISPR|2|spacer|5of14| id=20789538 [location: 31056..31087 of 68232; DR: TTTCTTAGCTGCCTATACGGCAGTGAAC]	32	gi|187939635|gb|EU595740.1| Pseudomonas aeruginosa strain PACS10223 clone fa1371, complete sequence	48558	48588	1	0511A0202_scaffold_91	Pseudomonas aeruginosa strain PACS10223 clone fa1371, complete sequence	TTTCTTAGCTGCCTATACGGCAGTGAAC	Pseudomonas aeruginosa strain PACS10223 clone fa1371, complete sequence	0511A0202	14	CCGCAGCAACGTCGGGAGCCGGGCCATGTTCT	5	A	0511A0202_Pseudomonas_aeruginosa_66_19
0511A0202_scaffold_91|CRISPR|2|spacer|6of14| id=20789538 [location: 31116..31147 of 68232; DR: TTTCTTAGCTGCCTATACGGCAGTGAAC]	32	gi|970332569|gb|CP013696.1| Pseudomonas aeruginosa strain 12-4-4(59), complete genome	3083852	3083883	1	0511A0202_scaffold_91	Pseudomonas aeruginosa strain 12-4-4(59), complete genome	TTTCTTAGCTGCCTATACGGCAGTGAAC	Pseudomonas aeruginosa strain 12-4-4(59), complete genome	0511A0202	14	CACTTCGCGAGACCGCGCGTACTCGTCTGCCT	5	A	0511A0202_Pseudomonas_aeruginosa_66_19
0511A0202_scaffold_91|CRISPR|2|spacer|6of14| id=20789538 [location: 31116..31147 of 68232; DR: TTTCTTAGCTGCCTATACGGCAGTGAAC]	32	gi|927993303|gb|CP012679.1| Pseudomonas aeruginosa strain PA1RG, complete genome	1447419	1447450	1	0511A0202_scaffold_91	Pseudomonas aeruginosa strain PA1RG, complete genome	TTTCTTAGCTGCCTATACGGCAGTGAAC	Pseudomonas aeruginosa strain PA1RG, complete genome	0511A0202	14	CACTTCGCGAGACCGCGCGTACTCGTCTGCCT	5	A	0511A0202_Pseudomonas_aeruginosa_66_19
0511A0202_scaffold_91|CRISPR|2|spacer|6of14| id=20789538 [location: 31116..31147 of 68232; DR: TTTCTTAGCTGCCTATACGGCAGTGAAC]	32	gi|927226644|gb|CP004054.2| Pseudomonas aeruginosa PA1, complete genome	1447420	1447451	1	0511A0202_scaffold_91	Pseudomonas aeruginosa PA1, complete genome	TTTCTTAGCTGCCTATACGGCAGTGAAC	Pseudomonas aeruginosa PA1, complete genome	0511A0202	14	CACTTCGCGAGACCGCGCGTACTCGTCTGCCT	5	A	0511A0202_Pseudomonas_aeruginosa_66_19
0511A0202_scaffold_91|CRISPR|2|spacer|6of14| id=20789538 [location: 31116..31147 of 68232; DR: TTTCTTAGCTGCCTATACGGCAGTGAAC]	32	gi|563408818|gb|CP006853.1| Pseudomonas aeruginosa MTB-1, complete genome	3432610	3432579	1	0511A0202_scaffold_91	Pseudomonas aeruginosa MTB-1, complete genome	TTTCTTAGCTGCCTATACGGCAGTGAAC	Pseudomonas aeruginosa MTB-1, complete genome	0511A0202	14	CACTTCGCGAGACCGCGCGTACTCGTCTGCCT	5	A	0511A0202_Pseudomonas_aeruginosa_66_19
0511A0202_scaffold_91|CRISPR|2|spacer|6of14| id=20789538 [location: 31116..31147 of 68232; DR: TTTCTTAGCTGCCTATACGGCAGTGAAC]	32	gi|557709751|gb|CP004055.1| Pseudomonas aeruginosa PA1R, complete genome	1711348	1711317	1	0511A0202_scaffold_91	Pseudomonas aeruginosa PA1R, complete genome	TTTCTTAGCTGCCTATACGGCAGTGAAC	Pseudomonas aeruginosa PA1R, complete genome	0511A0202	14	CACTTCGCGAGACCGCGCGTACTCGTCTGCCT	5	A	0511A0202_Pseudomonas_aeruginosa_66_19
0511A0202_scaffold_91|CRISPR|2|spacer|6of14| id=20789538 [location: 31116..31147 of 68232; DR: TTTCTTAGCTGCCTATACGGCAGTGAAC]	32	gi|187939777|gb|EU595743.1| Pseudomonas aeruginosa strain PACS458 clone fa1376, complete sequence	46678	46647	1	0511A0202_scaffold_91	Pseudomonas aeruginosa strain PACS458 clone fa1376, complete sequence	TTTCTTAGCTGCCTATACGGCAGTGAAC	Pseudomonas aeruginosa strain PACS458 clone fa1376, complete sequence	0511A0202	14	CACTTCGCGAGACCGCGCGTACTCGTCTGCCT	5	A	0511A0202_Pseudomonas_aeruginosa_66_19
0511A0202_scaffold_91|CRISPR|2|spacer|8of14| id=20789538 [location: 31236..31267 of 68232; DR: TTTCTTAGCTGCCTATACGGCAGTGAAC]	32	gi|957647579|dbj|AP017302.1| Pseudomonas aeruginosa DNA, complete genome, strain: IOMTU 133	2933536	2933567	0	0511A0202_scaffold_91	Pseudomonas aeruginosa DNA, complete genome, strain: IOMTU 133	TTTCTTAGCTGCCTATACGGCAGTGAAC	Pseudomonas aeruginosa DNA, complete genome, strain: IOMTU 133	0511A0202	14	GCCTGGTCGGTGAGCAGGAGGGTGCGATGCAA	5	A	0511A0202_Pseudomonas_aeruginosa_66_19
0511A0202_scaffold_91|CRISPR|2|spacer|8of14| id=20789538 [location: 31236..31267 of 68232; DR: TTTCTTAGCTGCCTATACGGCAGTGAAC]	32	gi|957647579|dbj|AP017302.1| Pseudomonas aeruginosa DNA, complete genome, strain: IOMTU 133	6388847	6388816	0	0511A0202_scaffold_91	Pseudomonas aeruginosa DNA, complete genome, strain: IOMTU 133	TTTCTTAGCTGCCTATACGGCAGTGAAC	Pseudomonas aeruginosa DNA, complete genome, strain: IOMTU 133	0511A0202	14	GCCTGGTCGGTGAGCAGGAGGGTGCGATGCAA	5	A	0511A0202_Pseudomonas_aeruginosa_66_19
0511A0202_scaffold_91|CRISPR|2|spacer|8of14| id=20789538 [location: 31236..31267 of 68232; DR: TTTCTTAGCTGCCTATACGGCAGTGAAC]	32	gi|817624209|gb|CP011369.1| Pseudomonas aeruginosa strain S04 90 genome	6610383	6610352	0	0511A0202_scaffold_91	Pseudomonas aeruginosa strain S04 90 genome	TTTCTTAGCTGCCTATACGGCAGTGAAC	Pseudomonas aeruginosa strain S04 90 genome	0511A0202	14	GCCTGGTCGGTGAGCAGGAGGGTGCGATGCAA	5	A	0511A0202_Pseudomonas_aeruginosa_66_19
0511A0202_scaffold_91|CRISPR|2|spacer|8of14| id=20789538 [location: 31236..31267 of 68232; DR: TTTCTTAGCTGCCTATACGGCAGTGAAC]	32	gi|685837395|dbj|AP014646.1| Pseudomonas aeruginosa DNA, complete genome, strain: NCGM 1984	6290401	6290370	0	0511A0202_scaffold_91	Pseudomonas aeruginosa DNA, complete genome, strain: NCGM 1984	TTTCTTAGCTGCCTATACGGCAGTGAAC	Pseudomonas aeruginosa DNA, complete genome, strain: NCGM 1984	0511A0202	14	GCCTGGTCGGTGAGCAGGAGGGTGCGATGCAA	5	A	0511A0202_Pseudomonas_aeruginosa_66_19
0511A0202_scaffold_91|CRISPR|2|spacer|8of14| id=20789538 [location: 31236..31267 of 68232; DR: TTTCTTAGCTGCCTATACGGCAGTGAAC]	32	gi|563408818|gb|CP006853.1| Pseudomonas aeruginosa MTB-1, complete genome	6082414	6082383	0	0511A0202_scaffold_91	Pseudomonas aeruginosa MTB-1, complete genome	TTTCTTAGCTGCCTATACGGCAGTGAAC	Pseudomonas aeruginosa MTB-1, complete genome	0511A0202	14	GCCTGGTCGGTGAGCAGGAGGGTGCGATGCAA	5	A	0511A0202_Pseudomonas_aeruginosa_66_19
0511A0202_scaffold_91|CRISPR|2|spacer|8of14| id=20789538 [location: 31236..31267 of 68232; DR: TTTCTTAGCTGCCTATACGGCAGTGAAC]	32	gi|148807389|gb|EF611302.1| Pseudomonas aeruginosa PAGI-6 genomic island sequence	7621	7590	0	0511A0202_scaffold_91	Pseudomonas aeruginosa PAGI-6 genomic island sequence	TTTCTTAGCTGCCTATACGGCAGTGAAC	Pseudomonas aeruginosa PAGI-6 genomic island sequence	0511A0202	14	GCCTGGTCGGTGAGCAGGAGGGTGCGATGCAA	5	A	0511A0202_Pseudomonas_aeruginosa_66_19
0511A0202_scaffold_91|CRISPR|2|spacer|8of14| id=20789538 [location: 31236..31267 of 68232; DR: TTTCTTAGCTGCCTATACGGCAGTGAAC]	32	gi|4063771|dbj|AB008550.1| Pseudomonas phage phiCTX DNA, complete genome	6748	6717	0	0511A0202_scaffold_91	Pseudomonas phage phiCTX DNA, complete genome	TTTCTTAGCTGCCTATACGGCAGTGAAC	Pseudomonas phage phiCTX DNA, complete genome	0511A0202	14	GCCTGGTCGGTGAGCAGGAGGGTGCGATGCAA	5	A	0511A0202_Pseudomonas_aeruginosa_66_19
0511A0202_scaffold_91|CRISPR|2|spacer|8of14| id=20789538 [location: 31236..31267 of 68232; DR: TTTCTTAGCTGCCTATACGGCAGTGAAC]	32	gi|3688477|emb|Y13918.1| Pseudomonas aeruginosa phage phi CTX DNA, complete genome	6748	6717	0	0511A0202_scaffold_91	Pseudomonas aeruginosa phage phi CTX DNA, complete genome	TTTCTTAGCTGCCTATACGGCAGTGAAC	Pseudomonas aeruginosa phage phi CTX DNA, complete genome	0511A0202	14	GCCTGGTCGGTGAGCAGGAGGGTGCGATGCAA	5	A	0511A0202_Pseudomonas_aeruginosa_66_19
0511A0202_scaffold_91|CRISPR|2|spacer|9of14| id=20789538 [location: 31296..31327 of 68232; DR: TTTCTTAGCTGCCTATACGGCAGTGAAC]	32	gi|953264201|emb|LN898172.1| Pseudomonas phage vB_PaeS_PM105	14992	15023	0	0511A0202_scaffold_91	Pseudomonas phage vB_PaeS_PM105	TTTCTTAGCTGCCTATACGGCAGTGAAC	Pseudomonas phage vB_PaeS_PM105	0511A0202	14	GCTTGGTAGGAGCAAACCATGCAAACTGATAT	5	A	0511A0202_Pseudomonas_aeruginosa_66_19
0511A0202_scaffold_91|CRISPR|2|spacer|9of14| id=20789538 [location: 31296..31327 of 68232; DR: TTTCTTAGCTGCCTATACGGCAGTGAAC]	32	gi|685837395|dbj|AP014646.1| Pseudomonas aeruginosa DNA, complete genome, strain: NCGM 1984	1316178	1316209	0	0511A0202_scaffold_91	Pseudomonas aeruginosa DNA, complete genome, strain: NCGM 1984	TTTCTTAGCTGCCTATACGGCAGTGAAC	Pseudomonas aeruginosa DNA, complete genome, strain: NCGM 1984	0511A0202	14	GCTTGGTAGGAGCAAACCATGCAAACTGATAT	5	A	0511A0202_Pseudomonas_aeruginosa_66_19
0511A0202_scaffold_91|CRISPR|2|spacer|9of14| id=20789538 [location: 31296..31327 of 68232; DR: TTTCTTAGCTGCCTATACGGCAGTGAAC]	32	gi|685837395|dbj|AP014646.1| Pseudomonas aeruginosa DNA, complete genome, strain: NCGM 1984	4333737	4333768	0	0511A0202_scaffold_91	Pseudomonas aeruginosa DNA, complete genome, strain: NCGM 1984	TTTCTTAGCTGCCTATACGGCAGTGAAC	Pseudomonas aeruginosa DNA, complete genome, strain: NCGM 1984	0511A0202	14	GCTTGGTAGGAGCAAACCATGCAAACTGATAT	5	A	0511A0202_Pseudomonas_aeruginosa_66_19
0511A0202_scaffold_91|CRISPR|2|spacer|9of14| id=20789538 [location: 31296..31327 of 68232; DR: TTTCTTAGCTGCCTATACGGCAGTGAAC]	32	gi|685837395|dbj|AP014646.1| Pseudomonas aeruginosa DNA, complete genome, strain: NCGM 1984	5618740	5618771	0	0511A0202_scaffold_91	Pseudomonas aeruginosa DNA, complete genome, strain: NCGM 1984	TTTCTTAGCTGCCTATACGGCAGTGAAC	Pseudomonas aeruginosa DNA, complete genome, strain: NCGM 1984	0511A0202	14	GCTTGGTAGGAGCAAACCATGCAAACTGATAT	5	A	0511A0202_Pseudomonas_aeruginosa_66_19
0511A0202_scaffold_91|CRISPR|2|spacer|9of14| id=20789538 [location: 31296..31327 of 68232; DR: TTTCTTAGCTGCCTATACGGCAGTGAAC]	32	gi|670351331|dbj|AP014622.1| Pseudomonas aeruginosa DNA, complete genome, strain: NCGM 1900	1316173	1316204	0	0511A0202_scaffold_91	Pseudomonas aeruginosa DNA, complete genome, strain: NCGM 1900	TTTCTTAGCTGCCTATACGGCAGTGAAC	Pseudomonas aeruginosa DNA, complete genome, strain: NCGM 1900	0511A0202	14	GCTTGGTAGGAGCAAACCATGCAAACTGATAT	5	A	0511A0202_Pseudomonas_aeruginosa_66_19
0511A0202_scaffold_91|CRISPR|2|spacer|9of14| id=20789538 [location: 31296..31327 of 68232; DR: TTTCTTAGCTGCCTATACGGCAGTGAAC]	32	gi|670351331|dbj|AP014622.1| Pseudomonas aeruginosa DNA, complete genome, strain: NCGM 1900	2601171	2601202	0	0511A0202_scaffold_91	Pseudomonas aeruginosa DNA, complete genome, strain: NCGM 1900	TTTCTTAGCTGCCTATACGGCAGTGAAC	Pseudomonas aeruginosa DNA, complete genome, strain: NCGM 1900	0511A0202	14	GCTTGGTAGGAGCAAACCATGCAAACTGATAT	5	A	0511A0202_Pseudomonas_aeruginosa_66_19
0511A0202_scaffold_91|CRISPR|2|spacer|9of14| id=20789538 [location: 31296..31327 of 68232; DR: TTTCTTAGCTGCCTATACGGCAGTGAAC]	32	gi|670351331|dbj|AP014622.1| Pseudomonas aeruginosa DNA, complete genome, strain: NCGM 1900	5618724	5618755	0	0511A0202_scaffold_91	Pseudomonas aeruginosa DNA, complete genome, strain: NCGM 1900	TTTCTTAGCTGCCTATACGGCAGTGAAC	Pseudomonas aeruginosa DNA, complete genome, strain: NCGM 1900	0511A0202	14	GCTTGGTAGGAGCAAACCATGCAAACTGATAT	5	A	0511A0202_Pseudomonas_aeruginosa_66_19
0511A0202_scaffold_91|CRISPR|2|spacer|9of14| id=20789538 [location: 31296..31327 of 68232; DR: TTTCTTAGCTGCCTATACGGCAGTGAAC]	32	gi|404056911|gb|JX495043.1| Pseudomonas phage JBD67, partial genome	14059	14090	0	0511A0202_scaffold_91	Pseudomonas phage JBD67, partial genome	TTTCTTAGCTGCCTATACGGCAGTGAAC	Pseudomonas phage JBD67, partial genome	0511A0202	14	GCTTGGTAGGAGCAAACCATGCAAACTGATAT	5	A	0511A0202_Pseudomonas_aeruginosa_66_19
0511A0202_scaffold_91|CRISPR|2|spacer|9of14| id=20789538 [location: 31296..31327 of 68232; DR: TTTCTTAGCTGCCTATACGGCAGTGAAC]	32	gi|404056722|gb|JX495041.1| Pseudomonas phage JBD18, complete genome	14316	14347	0	0511A0202_scaffold_91	Pseudomonas phage JBD18, complete genome	TTTCTTAGCTGCCTATACGGCAGTGAAC	Pseudomonas phage JBD18, complete genome	0511A0202	14	GCTTGGTAGGAGCAAACCATGCAAACTGATAT	5	A	0511A0202_Pseudomonas_aeruginosa_66_19
0511A0202_scaffold_91|CRISPR|2|spacer|10of14| id=20789538 [location: 31356..31387 of 68232; DR: TTTCTTAGCTGCCTATACGGCAGTGAAC]	32	gi|970332569|gb|CP013696.1| Pseudomonas aeruginosa strain 12-4-4(59), complete genome	4733939	4733970	0	0511A0202_scaffold_91	Pseudomonas aeruginosa strain 12-4-4(59), complete genome	TTTCTTAGCTGCCTATACGGCAGTGAAC	Pseudomonas aeruginosa strain 12-4-4(59), complete genome	0511A0202	14	CGTGTCGTCCGATCTGTGCACGTATCTCCAGT	5	A	0511A0202_Pseudomonas_aeruginosa_66_19
0511A0202_scaffold_91|CRISPR|2|spacer|10of14| id=20789538 [location: 31356..31387 of 68232; DR: TTTCTTAGCTGCCTATACGGCAGTGAAC]	32	gi|970332569|gb|CP013696.1| Pseudomonas aeruginosa strain 12-4-4(59), complete genome	4741007	4741038	0	0511A0202_scaffold_91	Pseudomonas aeruginosa strain 12-4-4(59), complete genome	TTTCTTAGCTGCCTATACGGCAGTGAAC	Pseudomonas aeruginosa strain 12-4-4(59), complete genome	0511A0202	14	CGTGTCGTCCGATCTGTGCACGTATCTCCAGT	5	A	0511A0202_Pseudomonas_aeruginosa_66_19
0511A0202_scaffold_91|CRISPR|2|spacer|10of14| id=20789538 [location: 31356..31387 of 68232; DR: TTTCTTAGCTGCCTATACGGCAGTGAAC]	32	gi|187939966|gb|EU595748.1| Pseudomonas aeruginosa strain PACS171b clone fa1386, complete sequence	32153	32122	0	0511A0202_scaffold_91	Pseudomonas aeruginosa strain PACS171b clone fa1386, complete sequence	TTTCTTAGCTGCCTATACGGCAGTGAAC	Pseudomonas aeruginosa strain PACS171b clone fa1386, complete sequence	0511A0202	14	CGTGTCGTCCGATCTGTGCACGTATCTCCAGT	5	A	0511A0202_Pseudomonas_aeruginosa_66_19
0511A0202_scaffold_91|CRISPR|2|spacer|10of14| id=20789538 [location: 31356..31387 of 68232; DR: TTTCTTAGCTGCCTATACGGCAGTGAAC]	32	gi|610413304|gb|CP007224.1| Pseudomonas aeruginosa PA96 genome	3074889	3074920	1	0511A0202_scaffold_91	Pseudomonas aeruginosa PA96 genome	TTTCTTAGCTGCCTATACGGCAGTGAAC	Pseudomonas aeruginosa PA96 genome	0511A0202	14	CGTGTCGTCCGATCTGTGCACGTATCTCCAGT	5	A	0511A0202_Pseudomonas_aeruginosa_66_19
0511A0202_scaffold_91|CRISPR|2|spacer|10of14| id=20789538 [location: 31356..31387 of 68232; DR: TTTCTTAGCTGCCTATACGGCAGTGAAC]	32	gi|610413304|gb|CP007224.1| Pseudomonas aeruginosa PA96 genome	3082219	3082250	1	0511A0202_scaffold_91	Pseudomonas aeruginosa PA96 genome	TTTCTTAGCTGCCTATACGGCAGTGAAC	Pseudomonas aeruginosa PA96 genome	0511A0202	14	CGTGTCGTCCGATCTGTGCACGTATCTCCAGT	5	A	0511A0202_Pseudomonas_aeruginosa_66_19
0511A0202_scaffold_91|CRISPR|2|spacer|10of14| id=20789538 [location: 31356..31387 of 68232; DR: TTTCTTAGCTGCCTATACGGCAGTGAAC]	32	gi|610413304|gb|CP007224.1| Pseudomonas aeruginosa PA96 genome	3089549	3089580	1	0511A0202_scaffold_91	Pseudomonas aeruginosa PA96 genome	TTTCTTAGCTGCCTATACGGCAGTGAAC	Pseudomonas aeruginosa PA96 genome	0511A0202	14	CGTGTCGTCCGATCTGTGCACGTATCTCCAGT	5	A	0511A0202_Pseudomonas_aeruginosa_66_19
0511A0202_scaffold_91|CRISPR|2|spacer|12of14| id=20789538 [location: 31476..31507 of 68232; DR: TTTCTTAGCTGCCTATACGGCAGTGAAC]	32	gi|698038887|gb|KM670336.1| Salmonella enterica subsp. enterica serovar Senftenberg strain SRC119 plasmid pSRC119-A/C, complete sequence	153815	153784	0	0511A0202_scaffold_91	Salmonella enterica subsp. enterica serovar Senftenberg strain SRC119 plasmid pSRC119-A/C, complete sequence	TTTCTTAGCTGCCTATACGGCAGTGAAC	Salmonella enterica subsp. enterica serovar Senftenberg strain SRC119 plasmid pSRC119-A/C, complete sequence	0511A0202	14	GGGTGGCCAAGTCGCCACGTATTTACTGATAA	5	A	0511A0202_Pseudomonas_aeruginosa_66_19
0511A0202_scaffold_91|CRISPR|2|spacer|13of14| id=20789538 [location: 31536..31567 of 68232; DR: TTTCTTAGCTGCCTATACGGCAGTGAAC]	32	gi|957647579|dbj|AP017302.1| Pseudomonas aeruginosa DNA, complete genome, strain: IOMTU 133	2645541	2645572	1	0511A0202_scaffold_91	Pseudomonas aeruginosa DNA, complete genome, strain: IOMTU 133	TTTCTTAGCTGCCTATACGGCAGTGAAC	Pseudomonas aeruginosa DNA, complete genome, strain: IOMTU 133	0511A0202	14	GCCTGGGCGCCGAAGGCCAGCGCGCCGGTGAT	5	A	0511A0202_Pseudomonas_aeruginosa_66_19
0511A0202_scaffold_91|CRISPR|2|spacer|13of14| id=20789538 [location: 31536..31567 of 68232; DR: TTTCTTAGCTGCCTATACGGCAGTGAAC]	32	gi|817624209|gb|CP011369.1| Pseudomonas aeruginosa strain S04 90 genome	2440644	2440675	1	0511A0202_scaffold_91	Pseudomonas aeruginosa strain S04 90 genome	TTTCTTAGCTGCCTATACGGCAGTGAAC	Pseudomonas aeruginosa strain S04 90 genome	0511A0202	14	GCCTGGGCGCCGAAGGCCAGCGCGCCGGTGAT	5	A	0511A0202_Pseudomonas_aeruginosa_66_19
0511A0202_scaffold_91|CRISPR|2|spacer|13of14| id=20789538 [location: 31536..31567 of 68232; DR: TTTCTTAGCTGCCTATACGGCAGTGAAC]	32	gi|441462320|gb|KC262634.1| Pseudomonas phage H66, complete genome	1685	1716	1	0511A0202_scaffold_91	Pseudomonas phage H66, complete genome	TTTCTTAGCTGCCTATACGGCAGTGAAC	Pseudomonas phage H66, complete genome	0511A0202	14	GCCTGGGCGCCGAAGGCCAGCGCGCCGGTGAT	5	A	0511A0202_Pseudomonas_aeruginosa_66_19
0511A0202_scaffold_91|CRISPR|2|spacer|14of14| id=20789538 [location: 31596..31627 of 68232; DR: TTTCTTAGCTGCCTATACGGCAGTGAAC]	32	gi|187939777|gb|EU595743.1| Pseudomonas aeruginosa strain PACS458 clone fa1376, complete sequence	46628	46597	0	0511A0202_scaffold_91	Pseudomonas aeruginosa strain PACS458 clone fa1376, complete sequence	TTTCTTAGCTGCCTATACGGCAGTGAAC	Pseudomonas aeruginosa strain PACS458 clone fa1376, complete sequence	0511A0202	14	TCTCAATCTCGAACATCGGCGAAAGCACGTCT	5	A	0511A0202_Pseudomonas_aeruginosa_66_19
0511A0202_scaffold_91|CRISPR|2|spacer|14of14| id=20789538 [location: 31596..31627 of 68232; DR: TTTCTTAGCTGCCTATACGGCAGTGAAC]	32	gi|970332569|gb|CP013696.1| Pseudomonas aeruginosa strain 12-4-4(59), complete genome	3083902	3083933	1	0511A0202_scaffold_91	Pseudomonas aeruginosa strain 12-4-4(59), complete genome	TTTCTTAGCTGCCTATACGGCAGTGAAC	Pseudomonas aeruginosa strain 12-4-4(59), complete genome	0511A0202	14	TCTCAATCTCGAACATCGGCGAAAGCACGTCT	5	A	0511A0202_Pseudomonas_aeruginosa_66_19
JBBB003G_scaffold_5|CRISPR|1|spacer|36of39| id=27794659 [location: 155565..155600 of 423185; DR: GTTTTATATTAACTATGAGGAATGTAAAT]	36	gi|110684521|gb|CP000315.1| Clostridium phage phiSM101, complete genome	23932	23967	0	JBBB003G_scaffold_5	Clostridium phage phiSM101, complete genome	GTTTTATATTAACTATGAGGAATGTAAAT	Clostridium phage phiSM101, complete genome	0522A0213	39	CTCATTATTAAATGATGATGTATTCTAACAGCTTTA	5	A	0522A0213_Clostridium_perfringens_28_397
0123W_scaffold_10|CRISPR|1|spacer|5of39| id=27365123 [location: 20325..20357 of 222435; DR: gttttccccgcgcgagcggggatgttcc]	33	gi|922844065|gb|CP006841.1| Corynebacterium lactis RW2-5, complete genome	2168935	2168967	1	0123W_scaffold_10	Corynebacterium lactis RW2-5, complete genome	GTTTTCCCCGCGCGAGCGGGGATGTTCC	Corynebacterium lactis RW2-5, complete genome	0123W	39	TGTCGCCCTGGGCCTTACCGGTGATGTTGGTTG	1	W	0123W_Corynebacterium_sp__HFH0082_59_121
0123W_scaffold_10|CRISPR|1|spacer|33of39| id=27365123 [location: 22033..22065 of 222435; DR: gttttccccgcgcgagcggggatgttcc]	33	gi|922844065|gb|CP006841.1| Corynebacterium lactis RW2-5, complete genome	767401	767432	1	0123W_scaffold_10	Corynebacterium lactis RW2-5, complete genome	GTTTTCCCCGCGCGAGCGGGGATGTTCC	Corynebacterium lactis RW2-5, complete genome	0123W	39	CGGCTGCTGTATGAGCGCGGCTGGGCAGACCCA	1	W	0123W_Corynebacterium_sp__HFH0082_59_121

## Sheet: Spacers
Spacer	spacer_sequence	spacer_scaffold	repeat_sequence	spacer_project	array_len	array_pos	spacer_infant	spacer_bin	spacer_taxonomy	spacer_BodySite
JBBB003B_scaffold_373|CRISPR|2|spacer|1of3| read_length_150 [location: 420..452 of 5391; DR: GTCTTCCCCGCCTACGCGGGGGTGAGCC]	GGACAGGTCTACGGCATCGGGGGTGGCGTTGGC	JBBB003B_scaffold_373	GTCTTCCCCGCCTACGCGGGGGTGAGCC	0517A0208	3	1	5	0520A0211_Propionibacterium_sp__HGH0353_63_15	Propionibacterium	A
JBBB003B_scaffold_373|CRISPR|2|spacer|2of3| read_length_150 [location: 481..514 of 5391; DR: GTCTTCCCCGCCTACGCGGGGGTGAGCC]	GATTCGCATCCACGGTGTCCCCGTGAAGAGTCTG	JBBB003B_scaffold_373	GTCTTCCCCGCCTACGCGGGGGTGAGCC	0517A0208	3	2	5	0520A0211_Propionibacterium_sp__HGH0353_63_15	Propionibacterium	A
JBBB003B_scaffold_373|CRISPR|2|spacer|3of3| read_length_150 [location: 543..575 of 5391; DR: GTCTTCCCCGCCTACGCGGGGGTGAGCC]	TTCGTTTCCGGCGTCGGTAGAGAATGACCAGGC	JBBB003B_scaffold_373	GTCTTCCCCGCCTACGCGGGGGTGAGCC	0517A0208	3	3	5	0520A0211_Propionibacterium_sp__HGH0353_63_15	Propionibacterium	A
JBBB003B_scaffold_554|CRISPR|1|spacer|1of4| read_length_150 [location: 2781..2820 of 3150; DR: GCCTCGGCTTAACTGCCGAGGCAACTTCGTTGAGGC]	CGGTGTGGTAGCCTGCCCTTGCTGTCTCTAGTGGGGTGAT	JBBB003B_scaffold_554	GCCTCGGCTTAACTGCCGAGGCAACTTCGTTGAGGC	0517A0208	4	1	5	0520A0211_Propionibacterium_sp__HGH0353_63_15	Propionibacterium	A
JBBB003B_scaffold_554|CRISPR|1|spacer|2of4| read_length_150 [location: 2857..2893 of 3150; DR: GCCTCGGCTTAACTGCCGAGGCAACTTCGTTGAGGC]	TTGAGAAGAATCTCGTCTTTCGAGTGGTCTTTCTCAT	JBBB003B_scaffold_554	GCCTCGGCTTAACTGCCGAGGCAACTTCGTTGAGGC	0517A0208	4	2	5	0520A0211_Propionibacterium_sp__HGH0353_63_15	Propionibacterium	A
JBBB003B_scaffold_554|CRISPR|1|spacer|3of4| read_length_150 [location: 2930..2967 of 3150; DR: GCCTCGGCTTAACTGCCGAGGCAACTTCGTTGAGGC]	AATGAAAGAAATGTCAATGTTGGAGAACCCTGTAGAAG	JBBB003B_scaffold_554	GCCTCGGCTTAACTGCCGAGGCAACTTCGTTGAGGC	0517A0208	4	3	5	0520A0211_Propionibacterium_sp__HGH0353_63_15	Propionibacterium	A
JBBB003B_scaffold_554|CRISPR|1|spacer|4of4| read_length_150 [location: 3004..3040 of 3150; DR: GCCTCGGCTTAACTGCCGAGGCAACTTCGTTGAGGC]	TCAACGCGGGCGTCGATCACAACACCAGCCTCGATAG	JBBB003B_scaffold_554	GCCTCGGCTTAACTGCCGAGGCAACTTCGTTGAGGC	0517A0208	4	4	5	0520A0211_Propionibacterium_sp__HGH0353_63_15	Propionibacterium	A
JBBB003D_scaffold_58_set_1_revised|CRISPR|1|spacer|1of13| [location: 173786..173815 of 239880; DR: GTTTTGGTACCATTCTAAACAACATGACTCTAAAAC]	ATATGTAAATCATAATGAGCATTTACATTG	JBBB003D_scaffold_58	GTTTTGGTACCATTCTAAACAACATGACTCTAAAAC	0519A0210	13	1	5	0519A0210_Enterococcus_faecalis_37_406	Enterococcus faecalis	A
JBBB003D_scaffold_58_set_1_revised|CRISPR|1|spacer|2of13| [location: 173852..173881 of 239880; DR: GTTTTGGTACCATTCTAAACAACATGACTCTAAAAC]	GAAACTTGATGTGCTACACCTTTAGCCCCA	JBBB003D_scaffold_58	GTTTTGGTACCATTCTAAACAACATGACTCTAAAAC	0519A0210	13	2	5	0519A0210_Enterococcus_faecalis_37_406	Enterococcus faecalis	A
JBBB003D_scaffold_58_set_1_revised|CRISPR|1|spacer|3of13| [location: 173918..173947 of 239880; DR: GTTTTGGTACCATTCTAAACAACATGACTCTAAAAC]	CCACGCTCCGGCAATTTCCCGACAACTGAT	JBBB003D_scaffold_58	GTTTTGGTACCATTCTAAACAACATGACTCTAAAAC	0519A0210	13	3	5	0519A0210_Enterococcus_faecalis_37_406	Enterococcus faecalis	A
JBBB003D_scaffold_58_set_1_revised|CRISPR|1|spacer|4of13| [location: 173984..174013 of 239880; DR: GTTTTGGTACCATTCTAAACAACATGACTCTAAAAC]	ACCATTGACAACAATATTCTTTTGTTGCAC	JBBB003D_scaffold_58	GTTTTGGTACCATTCTAAACAACATGACTCTAAAAC	0519A0210	13	4	5	0519A0210_Enterococcus_faecalis_37_406	Enterococcus faecalis	A
JBBB003D_scaffold_58_set_1_revised|CRISPR|1|spacer|5of13| [location: 174050..174079 of 239880; DR: GTTTTGGTACCATTCTAAACAACATGACTCTAAAAC]	GAAAGCGTTGTGTAATGTGTCCATTTCTTT	JBBB003D_scaffold_58	GTTTTGGTACCATTCTAAACAACATGACTCTAAAAC	0519A0210	13	5	5	0519A0210_Enterococcus_faecalis_37_406	Enterococcus faecalis	A
JBBB003D_scaffold_58_set_1_revised|CRISPR|1|spacer|6of13| [location: 174116..174145 of 239880; DR: GTTTTGGTACCATTCTAAACAACATGACTCTAAAAC]	CGTACTAAAGGTCATGTAATCTTACCAATC	JBBB003D_scaffold_58	GTTTTGGTACCATTCTAAACAACATGACTCTAAAAC	0519A0210	13	6	5	0519A0210_Enterococcus_faecalis_37_406	Enterococcus faecalis	A
JBBB003D_scaffold_58_set_1_revised|CRISPR|1|spacer|7of13| [location: 174182..174211 of 239880; DR: GTTTTGGTACCATTCTAAACAACATGACTCTAAAAC]	ATTTCACCTTCTGTTTTAGAAGCTGCTTTA	JBBB003D_scaffold_58	GTTTTGGTACCATTCTAAACAACATGACTCTAAAAC	0519A0210	13	7	5	0519A0210_Enterococcus_faecalis_37_406	Enterococcus faecalis	A
JBBB003D_scaffold_58_set_1_revised|CRISPR|1|spacer|8of13| [location: 174248..174277 of 239880; DR: GTTTTGGTACCATTCTAAACAACATGACTCTAAAAC]	CAACAATTTCCACCATACGTTTTTTCTCGC	JBBB003D_scaffold_58	GTTTTGGTACCATTCTAAACAACATGACTCTAAAAC	0519A0210	13	8	5	0519A0210_Enterococcus_faecalis_37_406	Enterococcus faecalis	A
JBBB003D_scaffold_58_set_1_revised|CRISPR|1|spacer|9of13| [location: 174314..174343 of 239880; DR: GTTTTGGTACCATTCTAAACAACATGACTCTAAAAC]	GCATATCAAGCGCACTACTTAAATGAAAAC	JBBB003D_scaffold_58	GTTTTGGTACCATTCTAAACAACATGACTCTAAAAC	0519A0210	13	9	5	0519A0210_Enterococcus_faecalis_37_406	Enterococcus faecalis	A
JBBB003D_scaffold_58_set_1_revised|CRISPR|1|spacer|10of13| [location: 174380..174409 of 239880; DR: GTTTTGGTACCATTCTAAACAACATGACTCTAAAAC]	CTATAATGCCTGTGAGTAGCGTGTGTGTGC	JBBB003D_scaffold_58	GTTTTGGTACCATTCTAAACAACATGACTCTAAAAC	0519A0210	13	10	5	0519A0210_Enterococcus_faecalis_37_406	Enterococcus faecalis	A
JBBB003D_scaffold_58_set_1_revised|CRISPR|1|spacer|11of13| [location: 174446..174475 of 239880; DR: GTTTTGGTACCATTCTAAACAACATGACTCTAAAAC]	CCCGTCTGTAATACACGTAACAACAAGCCA	JBBB003D_scaffold_58	GTTTTGGTACCATTCTAAACAACATGACTCTAAAAC	0519A0210	13	11	5	0519A0210_Enterococcus_faecalis_37_406	Enterococcus faecalis	A
JBBB003D_scaffold_58_set_1_revised|CRISPR|1|spacer|12of13| [location: 174512..174541 of 239880; DR: GTTTTGGTACCATTCTAAACAACATGACTCTAAAAC]	AGAAAACTATACTCATATTTTTAAAGGTGT	JBBB003D_scaffold_58	GTTTTGGTACCATTCTAAACAACATGACTCTAAAAC	0519A0210	13	12	5	0519A0210_Enterococcus_faecalis_37_406	Enterococcus faecalis	A
JBBB003D_scaffold_58_set_1_revised|CRISPR|1|spacer|13of13| [location: 174578..174607 of 239880; DR: GTTTTGGTACCATTCTAAACAACATGACTCTAAAAC]	GATAACTTAGAAAAGATGCAGGATGTTTTT	JBBB003D_scaffold_58	GTTTTGGTACCATTCTAAACAACATGACTCTAAAAC	0519A0210	13	13	5	0519A0210_Enterococcus_faecalis_37_406	Enterococcus faecalis	A
0522W_scaffold_27|CRISPR|1|spacer|1of18| id=27370724 [location: 23835..23867 of 70231; DR: GTGCTCCCCGCGTAAGCGGGGATGAGCC]	GTCGCCAGGCGGACAAAGTGGCGGCAGAAACTT	0522W_scaffold_27	GTGCTCCCCGCGTAAGCGGGGATGAGCC	0522W	18	1	5	0522W_Corynebacterium_59_9	Corynebacterium	W
0522W_scaffold_27|CRISPR|1|spacer|2of18| id=27370724 [location: 23896..23928 of 70231; DR: GTGCTCCCCGCGTAAGCGGGGATGAGCC]	CAGTGTGCCTAGCGCGCCGTAGCCGTCATCCCC	0522W_scaffold_27	GTGCTCCCCGCGTAAGCGGGGATGAGCC	0522W	18	2	5	0522W_Corynebacterium_59_9	Corynebacterium	W
0522W_scaffold_27|CRISPR|1|spacer|3of18| id=27370724 [location: 23957..23989 of 70231; DR: GTGCTCCCCGCGTAAGCGGGGATGAGCC]	CTCATCGCAGGGAGCTAGGCATGGAGATCATTT	0522W_scaffold_27	GTGCTCCCCGCGTAAGCGGGGATGAGCC	0522W	18	3	5	0522W_Corynebacterium_59_9	Corynebacterium	W
0522W_scaffold_27|CRISPR|1|spacer|4of18| id=27370724 [location: 24018..24050 of 70231; DR: GTGCTCCCCGCGTAAGCGGGGATGAGCC]	CACCACGTACCCACCACGTGCGGTTGGCTACGT	0522W_scaffold_27	GTGCTCCCCGCGTAAGCGGGGATGAGCC	0522W	18	4	5	0522W_Corynebacterium_59_9	Corynebacterium	W
0522W_scaffold_27|CRISPR|1|spacer|5of18| id=27370724 [location: 24079..24111 of 70231; DR: GTGCTCCCCGCGTAAGCGGGGATGAGCC]	CTCCTATCTGCTGGCCTGCGCGTACACGGTCAC	0522W_scaffold_27	GTGCTCCCCGCGTAAGCGGGGATGAGCC	0522W	18	5	5	0522W_Corynebacterium_59_9	Corynebacterium	W
0522W_scaffold_27|CRISPR|1|spacer|6of18| id=27370724 [location: 24140..24172 of 70231; DR: GTGCTCCCCGCGTAAGCGGGGATGAGCC]	GGATTCCCACTCGGGGCCTCGGGTTTCTATCTC	0522W_scaffold_27	GTGCTCCCCGCGTAAGCGGGGATGAGCC	0522W	18	6	5	0522W_Corynebacterium_59_9	Corynebacterium	W
0522W_scaffold_27|CRISPR|1|spacer|7of18| id=27370724 [location: 24201..24234 of 70231; DR: GTGCTCCCCGCGTAAGCGGGGATGAGCC]	CGCGGTCACTGTGGGCAGTGAGGTGATTATTGGC	0522W_scaffold_27	GTGCTCCCCGCGTAAGCGGGGATGAGCC	0522W	18	7	5	0522W_Corynebacterium_59_9	Corynebacterium	W
0522W_scaffold_27|CRISPR|1|spacer|8of18| id=27370724 [location: 24263..24295 of 70231; DR: GTGCTCCCCGCGTAAGCGGGGATGAGCC]	GTCCTCAACCTTGCGGGCTAAATCGTCCCGCTG	0522W_scaffold_27	GTGCTCCCCGCGTAAGCGGGGATGAGCC	0522W	18	8	5	0522W_Corynebacterium_59_9	Corynebacterium	W
0522W_scaffold_27|CRISPR|1|spacer|9of18| id=27370724 [location: 24324..24355 of 70231; DR: GTGCTCCCCGCGTAAGCGGGGATGAGCC]	CCGGAAGCCCCCCGGCTAACCCAACTTCAAAA	0522W_scaffold_27	GTGCTCCCCGCGTAAGCGGGGATGAGCC	0522W	18	9	5	0522W_Corynebacterium_59_9	Corynebacterium	W
0522W_scaffold_27|CRISPR|1|spacer|10of18| id=27370724 [location: 24384..24416 of 70231; DR: GTGCTCCCCGCGTAAGCGGGGATGAGCC]	CCGGCCCGCAGACATGAACCTCGCCGCCGCAGC	0522W_scaffold_27	GTGCTCCCCGCGTAAGCGGGGATGAGCC	0522W	18	10	5	0522W_Corynebacterium_59_9	Corynebacterium	W
0522W_scaffold_27|CRISPR|1|spacer|11of18| id=27370724 [location: 24445..24477 of 70231; DR: GTGCTCCCCGCGTAAGCGGGGATGAGCC]	CCTCACTAGCCGAACGCACAATCCGATAAGACC	0522W_scaffold_27	GTGCTCCCCGCGTAAGCGGGGATGAGCC	0522W	18	11	5	0522W_Corynebacterium_59_9	Corynebacterium	W
0522W_scaffold_27|CRISPR|1|spacer|12of18| id=27370724 [location: 24506..24538 of 70231; DR: GTGCTCCCCGCGTAAGCGGGGATGAGCC]	CGGCTACATCGAACTGCCAGAAAACCACCCCTG	0522W_scaffold_27	GTGCTCCCCGCGTAAGCGGGGATGAGCC	0522W	18	12	5	0522W_Corynebacterium_59_9	Corynebacterium	W
0522W_scaffold_27|CRISPR|1|spacer|13of18| id=27370724 [location: 24567..24599 of 70231; DR: GTGCTCCCCGCGTAAGCGGGGATGAGCC]	TCGGCCACGCTCACACCTCACTAAATTCAGTTA	0522W_scaffold_27	GTGCTCCCCGCGTAAGCGGGGATGAGCC	0522W	18	13	5	0522W_Corynebacterium_59_9	Corynebacterium	W
0522W_scaffold_27|CRISPR|1|spacer|14of18| id=27370724 [location: 24628..24660 of 70231; DR: GTGCTCCCCGCGTAAGCGGGGATGAGCC]	CATACCTGTGGGTGCTTGAAGATTCCCTAAAAC	0522W_scaffold_27	GTGCTCCCCGCGTAAGCGGGGATGAGCC	0522W	18	14	5	0522W_Corynebacterium_59_9	Corynebacterium	W
0522W_scaffold_27|CRISPR|1|spacer|15of18| id=27370724 [location: 24689..24721 of 70231; DR: GTGCTCCCCGCGTAAGCGGGGATGAGCC]	GCATCGCGCCTAGCGCTTCGATTGCGTCCGAAG	0522W_scaffold_27	GTGCTCCCCGCGTAAGCGGGGATGAGCC	0522W	18	15	5	0522W_Corynebacterium_59_9	Corynebacterium	W
0522W_scaffold_27|CRISPR|1|spacer|16of18| id=27370724 [location: 24750..24782 of 70231; DR: GTGCTCCCCGCGTAAGCGGGGATGAGCC]	CCGGAGCTAGTACCGCAGGAGACGCCAAGACGC	0522W_scaffold_27	GTGCTCCCCGCGTAAGCGGGGATGAGCC	0522W	18	16	5	0522W_Corynebacterium_59_9	Corynebacterium	W
0522W_scaffold_27|CRISPR|1|spacer|17of18| id=27370724 [location: 24811..24843 of 70231; DR: GTGCTCCCCGCGTAAGCGGGGATGAGCC]	CGAGAAGCGTGCGGCGCGGCGAGATGAGTTGGT	0522W_scaffold_27	GTGCTCCCCGCGTAAGCGGGGATGAGCC	0522W	18	17	5	0522W_Corynebacterium_59_9	Corynebacterium	W
0522W_scaffold_27|CRISPR|1|spacer|18of18| id=27370724 [location: 24872..24904 of 70231; DR: GTGCTCCCCGCGTAAGCGGGGATGAGCC]	GCCTCCCCACGGGCACCAGGCCACCAGACCCTC	0522W_scaffold_27	GTGCTCCCCGCGTAAGCGGGGATGAGCC	0522W	18	18	5	0522W_Corynebacterium_59_9	Corynebacterium	W
0511A0202_scaffold_91|CRISPR|1|spacer|1of20| id=20789538 [location: 21058..21090 of 68232; DR: GTTCACTGCCGTGTAGGCAGCTAAGAAA]	GGACTGATCCGCCGCACTGGTACTGACCACTAC	0511A0202_scaffold_91	GTTCACTGCCGTGTAGGCAGCTAAGAAA	0511A0202	20	1	5	0511A0202_Pseudomonas_aeruginosa_66_19	Pseudomonas aeruginosa	A
0511A0202_scaffold_91|CRISPR|1|spacer|2of20| id=20789538 [location: 21119..21150 of 68232; DR: GTTCACTGCCGTGTAGGCAGCTAAGAAA]	AGCAACACCGGCTACCAGTCGGCAGCCAGCAA	0511A0202_scaffold_91	GTTCACTGCCGTGTAGGCAGCTAAGAAA	0511A0202	20	2	5	0511A0202_Pseudomonas_aeruginosa_66_19	Pseudomonas aeruginosa	A
0511A0202_scaffold_91|CRISPR|1|spacer|3of20| id=20789538 [location: 21179..21210 of 68232; DR: GTTCACTGCCGTGTAGGCAGCTAAGAAA]	CGGTCCTGCCAGTACTGCGGCAGGATCTGGTC	0511A0202_scaffold_91	GTTCACTGCCGTGTAGGCAGCTAAGAAA	0511A0202	20	3	5	0511A0202_Pseudomonas_aeruginosa_66_19	Pseudomonas aeruginosa	A
0511A0202_scaffold_91|CRISPR|1|spacer|4of20| id=20789538 [location: 21239..21270 of 68232; DR: GTTCACTGCCGTGTAGGCAGCTAAGAAA]	AGCCTGGCGCCCTTCGAGTCCATCCAGCCCGG	0511A0202_scaffold_91	GTTCACTGCCGTGTAGGCAGCTAAGAAA	0511A0202	20	4	5	0511A0202_Pseudomonas_aeruginosa_66_19	Pseudomonas aeruginosa	A
0511A0202_scaffold_91|CRISPR|1|spacer|5of20| id=20789538 [location: 21299..21330 of 68232; DR: GTTCACTGCCGTGTAGGCAGCTAAGAAA]	CATCCAATTCGCCGATCCGGCGCAAGCGCCCG	0511A0202_scaffold_91	GTTCACTGCCGTGTAGGCAGCTAAGAAA	0511A0202	20	5	5	0511A0202_Pseudomonas_aeruginosa_66_19	Pseudomonas aeruginosa	A
0511A0202_scaffold_91|CRISPR|1|spacer|6of20| id=20789538 [location: 21359..21390 of 68232; DR: GTTCACTGCCGTGTAGGCAGCTAAGAAA]	ACGAAGCAGATCGCCGAATGCGGCGTCAGCGC	0511A0202_scaffold_91	GTTCACTGCCGTGTAGGCAGCTAAGAAA	0511A0202	20	6	5	0511A0202_Pseudomonas_aeruginosa_66_19	Pseudomonas aeruginosa	A
0511A0202_scaffold_91|CRISPR|1|spacer|7of20| id=20789538 [location: 21419..21450 of 68232; DR: GTTCACTGCCGTGTAGGCAGCTAAGAAA]	GTGGGTGCAAATCGCGATTCTGGTCGCGTCGT	0511A0202_scaffold_91	GTTCACTGCCGTGTAGGCAGCTAAGAAA	0511A0202	20	7	5	0511A0202_Pseudomonas_aeruginosa_66_19	Pseudomonas aeruginosa	A
0511A0202_scaffold_91|CRISPR|1|spacer|8of20| id=20789538 [location: 21479..21510 of 68232; DR: GTTCACTGCCGTGTAGGCAGCTAAGAAA]	TGAATATCAGCCTGCAAAGCGTCGTCGTAGTA	0511A0202_scaffold_91	GTTCACTGCCGTGTAGGCAGCTAAGAAA	0511A0202	20	8	5	0511A0202_Pseudomonas_aeruginosa_66_19	Pseudomonas aeruginosa	A
0511A0202_scaffold_91|CRISPR|1|spacer|9of20| id=20789538 [location: 21539..21570 of 68232; DR: GTTCACTGCCGTGTAGGCAGCTAAGAAA]	AAGCCGGGCCGATGTTCGAGCCTGGCTGCGTG	0511A0202_scaffold_91	GTTCACTGCCGTGTAGGCAGCTAAGAAA	0511A0202	20	9	5	0511A0202_Pseudomonas_aeruginosa_66_19	Pseudomonas aeruginosa	A
0511A0202_scaffold_91|CRISPR|1|spacer|10of20| id=20789538 [location: 21599..21630 of 68232; DR: GTTCACTGCCGTGTAGGCAGCTAAGAAA]	TGGACAATGCGCAGCCCAGGCGCTGGATTTAC	0511A0202_scaffold_91	GTTCACTGCCGTGTAGGCAGCTAAGAAA	0511A0202	20	10	5	0511A0202_Pseudomonas_aeruginosa_66_19	Pseudomonas aeruginosa	A
0511A0202_scaffold_91|CRISPR|1|spacer|11of20| id=20789538 [location: 21659..21690 of 68232; DR: GTTCACTGCCGTGTAGGCAGCTAAGAAA]	ATGCGAGGCTGATCGAGGTGCGCGGTTCTGTT	0511A0202_scaffold_91	GTTCACTGCCGTGTAGGCAGCTAAGAAA	0511A0202	20	11	5	0511A0202_Pseudomonas_aeruginosa_66_19	Pseudomonas aeruginosa	A
0511A0202_scaffold_91|CRISPR|1|spacer|12of20| id=20789538 [location: 21719..21750 of 68232; DR: GTTCACTGCCGTGTAGGCAGCTAAGAAA]	GTGCGCGGATGGCTGGTATCTCGAGCACGATT	0511A0202_scaffold_91	GTTCACTGCCGTGTAGGCAGCTAAGAAA	0511A0202	20	12	5	0511A0202_Pseudomonas_aeruginosa_66_19	Pseudomonas aeruginosa	A
0511A0202_scaffold_91|CRISPR|1|spacer|13of20| id=20789538 [location: 21779..21810 of 68232; DR: GTTCACTGCCGTGTAGGCAGCTAAGAAA]	AGGCAAACAACGGAAAGATCACCACCGAAGGC	0511A0202_scaffold_91	GTTCACTGCCGTGTAGGCAGCTAAGAAA	0511A0202	20	13	5	0511A0202_Pseudomonas_aeruginosa_66_19	Pseudomonas aeruginosa	A
0511A0202_scaffold_91|CRISPR|1|spacer|14of20| id=20789538 [location: 21839..21870 of 68232; DR: GTTCACTGCCGTGTAGGCAGCTAAGAAA]	AACGAAACAGGCCCAGCACAGCCGCTTGATAA	0511A0202_scaffold_91	GTTCACTGCCGTGTAGGCAGCTAAGAAA	0511A0202	20	14	5	0511A0202_Pseudomonas_aeruginosa_66_19	Pseudomonas aeruginosa	A
0511A0202_scaffold_91|CRISPR|1|spacer|15of20| id=20789538 [location: 21899..21930 of 68232; DR: GTTCACTGCCGTGTAGGCAGCTAAGAAA]	ACAAGACGCTCATCGACGGCAGCATCGAGACG	0511A0202_scaffold_91	GTTCACTGCCGTGTAGGCAGCTAAGAAA	0511A0202	20	15	5	0511A0202_Pseudomonas_aeruginosa_66_19	Pseudomonas aeruginosa	A
0511A0202_scaffold_91|CRISPR|1|spacer|16of20| id=20789538 [location: 21959..21990 of 68232; DR: GTTCACTGCCGTGTAGGCAGCTAAGAAA]	AAGGTGACGATGCACAGCTGTTGCGCGCGGTT	0511A0202_scaffold_91	GTTCACTGCCGTGTAGGCAGCTAAGAAA	0511A0202	20	16	5	0511A0202_Pseudomonas_aeruginosa_66_19	Pseudomonas aeruginosa	A
0511A0202_scaffold_91|CRISPR|1|spacer|17of20| id=20789538 [location: 22019..22050 of 68232; DR: GTTCACTGCCGTGTAGGCAGCTAAGAAA]	ATCCTCGAACAGCCCGGGTTCGGTCGCCTCCA	0511A0202_scaffold_91	GTTCACTGCCGTGTAGGCAGCTAAGAAA	0511A0202	20	17	5	0511A0202_Pseudomonas_aeruginosa_66_19	Pseudomonas aeruginosa	A
0511A0202_scaffold_91|CRISPR|1|spacer|18of20| id=20789538 [location: 22079..22110 of 68232; DR: GTTCACTGCCGTGTAGGCAGCTAAGAAA]	AGGAGTTTGCGGCCCCGCTCCCTGCGGCTCTC	0511A0202_scaffold_91	GTTCACTGCCGTGTAGGCAGCTAAGAAA	0511A0202	20	18	5	0511A0202_Pseudomonas_aeruginosa_66_19	Pseudomonas aeruginosa	A
0511A0202_scaffold_91|CRISPR|1|spacer|19of20| id=20789538 [location: 22139..22170 of 68232; DR: GTTCACTGCCGTGTAGGCAGCTAAGAAA]	TTCACGGCGGGCTTGATGTCCGCGTCTACCTG	0511A0202_scaffold_91	GTTCACTGCCGTGTAGGCAGCTAAGAAA	0511A0202	20	19	5	0511A0202_Pseudomonas_aeruginosa_66_19	Pseudomonas aeruginosa	A
0511A0202_scaffold_91|CRISPR|1|spacer|20of20| id=20789538 [location: 22199..22230 of 68232; DR: GTTCACTGCCGTGTAGGCAGCTAAGAAA]	TTGCCGAGTACGATGCCTGATACATGAATCCA	0511A0202_scaffold_91	GTTCACTGCCGTGTAGGCAGCTAAGAAA	0511A0202	20	20	5	0511A0202_Pseudomonas_aeruginosa_66_19	Pseudomonas aeruginosa	A
0511A0202_scaffold_91|CRISPR|2|spacer|1of14| id=20789538 [location: 30810..30847 of 68232; DR: TTTCTTAGCTGCCTATACGGCAGTGAAC]	TCGCCCGAAGCCCGCTTATGAACTTCGGGACATTTTTT	0511A0202_scaffold_91	TTTCTTAGCTGCCTATACGGCAGTGAAC	0511A0202	14	1	5	0511A0202_Pseudomonas_aeruginosa_66_19	Pseudomonas aeruginosa	A
0511A0202_scaffold_91|CRISPR|2|spacer|2of14| id=20789538 [location: 30876..30907 of 68232; DR: TTTCTTAGCTGCCTATACGGCAGTGAAC]	GCGTCAGCTTACAACTGGCTCGGCGTAGCTAT	0511A0202_scaffold_91	TTTCTTAGCTGCCTATACGGCAGTGAAC	0511A0202	14	2	5	0511A0202_Pseudomonas_aeruginosa_66_19	Pseudomonas aeruginosa	A
0511A0202_scaffold_91|CRISPR|2|spacer|3of14| id=20789538 [location: 30936..30967 of 68232; DR: TTTCTTAGCTGCCTATACGGCAGTGAAC]	AGTTCGGTGCGATAGCGCCGCTTCCTGCAAAC	0511A0202_scaffold_91	TTTCTTAGCTGCCTATACGGCAGTGAAC	0511A0202	14	3	5	0511A0202_Pseudomonas_aeruginosa_66_19	Pseudomonas aeruginosa	A
0511A0202_scaffold_91|CRISPR|2|spacer|4of14| id=20789538 [location: 30996..31027 of 68232; DR: TTTCTTAGCTGCCTATACGGCAGTGAAC]	GCCAGAAGGCGGACAAGCTCGTCTTGCGTCAT	0511A0202_scaffold_91	TTTCTTAGCTGCCTATACGGCAGTGAAC	0511A0202	14	4	5	0511A0202_Pseudomonas_aeruginosa_66_19	Pseudomonas aeruginosa	A
0511A0202_scaffold_91|CRISPR|2|spacer|5of14| id=20789538 [location: 31056..31087 of 68232; DR: TTTCTTAGCTGCCTATACGGCAGTGAAC]	CCGCAGCAACGTCGGGAGCCGGGCCATGTTCT	0511A0202_scaffold_91	TTTCTTAGCTGCCTATACGGCAGTGAAC	0511A0202	14	5	5	0511A0202_Pseudomonas_aeruginosa_66_19	Pseudomonas aeruginosa	A
0511A0202_scaffold_91|CRISPR|2|spacer|6of14| id=20789538 [location: 31116..31147 of 68232; DR: TTTCTTAGCTGCCTATACGGCAGTGAAC]	CACTTCGCGAGACCGCGCGTACTCGTCTGCCT	0511A0202_scaffold_91	TTTCTTAGCTGCCTATACGGCAGTGAAC	0511A0202	14	6	5	0511A0202_Pseudomonas_aeruginosa_66_19	Pseudomonas aeruginosa	A
0511A0202_scaffold_91|CRISPR|2|spacer|7of14| id=20789538 [location: 31176..31207 of 68232; DR: TTTCTTAGCTGCCTATACGGCAGTGAAC]	GGCCGGAAAGGCGCGTGATGCGTGAACGTTCA	0511A0202_scaffold_91	TTTCTTAGCTGCCTATACGGCAGTGAAC	0511A0202	14	7	5	0511A0202_Pseudomonas_aeruginosa_66_19	Pseudomonas aeruginosa	A
0511A0202_scaffold_91|CRISPR|2|spacer|8of14| id=20789538 [location: 31236..31267 of 68232; DR: TTTCTTAGCTGCCTATACGGCAGTGAAC]	GCCTGGTCGGTGAGCAGGAGGGTGCGATGCAA	0511A0202_scaffold_91	TTTCTTAGCTGCCTATACGGCAGTGAAC	0511A0202	14	8	5	0511A0202_Pseudomonas_aeruginosa_66_19	Pseudomonas aeruginosa	A
0511A0202_scaffold_91|CRISPR|2|spacer|9of14| id=20789538 [location: 31296..31327 of 68232; DR: TTTCTTAGCTGCCTATACGGCAGTGAAC]	GCTTGGTAGGAGCAAACCATGCAAACTGATAT	0511A0202_scaffold_91	TTTCTTAGCTGCCTATACGGCAGTGAAC	0511A0202	14	9	5	0511A0202_Pseudomonas_aeruginosa_66_19	Pseudomonas aeruginosa	A
0511A0202_scaffold_91|CRISPR|2|spacer|10of14| id=20789538 [location: 31356..31387 of 68232; DR: TTTCTTAGCTGCCTATACGGCAGTGAAC]	CGTGTCGTCCGATCTGTGCACGTATCTCCAGT	0511A0202_scaffold_91	TTTCTTAGCTGCCTATACGGCAGTGAAC	0511A0202	14	10	5	0511A0202_Pseudomonas_aeruginosa_66_19	Pseudomonas aeruginosa	A
0511A0202_scaffold_91|CRISPR|2|spacer|11of14| id=20789538 [location: 31416..31447 of 68232; DR: TTTCTTAGCTGCCTATACGGCAGTGAAC]	TGTTGAACGGGTGTCGCTGCAACACGCAGCAA	0511A0202_scaffold_91	TTTCTTAGCTGCCTATACGGCAGTGAAC	0511A0202	14	11	5	0511A0202_Pseudomonas_aeruginosa_66_19	Pseudomonas aeruginosa	A
0511A0202_scaffold_91|CRISPR|2|spacer|12of14| id=20789538 [location: 31476..31507 of 68232; DR: TTTCTTAGCTGCCTATACGGCAGTGAAC]	GGGTGGCCAAGTCGCCACGTATTTACTGATAA	0511A0202_scaffold_91	TTTCTTAGCTGCCTATACGGCAGTGAAC	0511A0202	14	12	5	0511A0202_Pseudomonas_aeruginosa_66_19	Pseudomonas aeruginosa	A
0511A0202_scaffold_91|CRISPR|2|spacer|13of14| id=20789538 [location: 31536..31567 of 68232; DR: TTTCTTAGCTGCCTATACGGCAGTGAAC]	GCCTGGGCGCCGAAGGCCAGCGCGCCGGTGAT	0511A0202_scaffold_91	TTTCTTAGCTGCCTATACGGCAGTGAAC	0511A0202	14	13	5	0511A0202_Pseudomonas_aeruginosa_66_19	Pseudomonas aeruginosa	A
0511A0202_scaffold_91|CRISPR|2|spacer|14of14| id=20789538 [location: 31596..31627 of 68232; DR: TTTCTTAGCTGCCTATACGGCAGTGAAC]	TCTCAATCTCGAACATCGGCGAAAGCACGTCT	0511A0202_scaffold_91	TTTCTTAGCTGCCTATACGGCAGTGAAC	0511A0202	14	14	5	0511A0202_Pseudomonas_aeruginosa_66_19	Pseudomonas aeruginosa	A
0528Y_scaffold_1|CRISPR|1|spacer|1of4| id=27375411 [location: 209239..209279 of 420656; DR: GGTGGCCGTGACTTTGGCGGCCGCG]	GTCGTGAGGGCGGTTTCCGCGACTTCGATCGCCGCGAGGGT	0528Y_scaffold_1	GGTGGCCGTGACTTTGGCGGCCGCG	0528Y	4	1	5	0528Y_Rothia_mucilaginosa_59_11	Rothia mucilaginosa	Y
0528Y_scaffold_1|CRISPR|1|spacer|2of4| id=27375411 [location: 209305..209348 of 420656; DR: GGTGGCCGTGACTTTGGCGGCCGCG]	GTAACCGTGACGGTGGCCGTGACTTCGGCGGTGACCGCGACTTC	0528Y_scaffold_1	GGTGGCCGTGACTTTGGCGGCCGCG	0528Y	4	2	5	0528Y_Rothia_mucilaginosa_59_11	Rothia mucilaginosa	Y
0528Y_scaffold_1|CRISPR|1|spacer|3of4| id=27375411 [location: 209374..209426 of 420656; DR: GGTGGCCGTGACTTTGGCGGCCGCG]	ACTTCGGTGGCCGTGATAATCGTCGCGATGGCGGCTACCGCGGTAACCGTGAG	0528Y_scaffold_1	GGTGGCCGTGACTTTGGCGGCCGCG	0528Y	4	3	5	0528Y_Rothia_mucilaginosa_59_11	Rothia mucilaginosa	Y
0528Y_scaffold_1|CRISPR|1|spacer|4of4| id=27375411 [location: 209452..209504 of 420656; DR: GGTGGCCGTGACTTTGGCGGCCGCG]	ACTTCGGTGGCCGTGATAATCGTCGCGATGGCGGCTACCGCGGTAACCGTGAC	0528Y_scaffold_1	GGTGGCCGTGACTTTGGCGGCCGCG	0528Y	4	4	5	0528Y_Rothia_mucilaginosa_59_11	Rothia mucilaginosa	Y
0528Y_scaffold_17|CRISPR|1|spacer|1of3| id=27375427 [location: 84108..84131 of 233562; DR: CCGCAACCCCTTCCCCAGGTGGAACAA]	AGCAAAAAATCCCAGTTTTTTTCA	0528Y_scaffold_17	CCGCAACCCCTTCCCCAGGTGGAACAA	0528Y	3	1	5	0528Y_Rothia_mucilaginosa_59_11	Rothia mucilaginosa	Y
0528Y_scaffold_17|CRISPR|1|spacer|2of3| id=27375427 [location: 84159..84200 of 233562; DR: CCGCAACCCCTTCCCCAGGTGGAACAA]	NNNNNNNNNNNNNNNNNNNNNNNNNNNNNNNNNNNNNNNNNN	0528Y_scaffold_17	CCGCAACCCCTTCCCCAGGTGGAACAA	0528Y	3	2	5	0528Y_Rothia_mucilaginosa_59_11	Rothia mucilaginosa	Y
0528Y_scaffold_17|CRISPR|1|spacer|3of3| id=27375427 [location: 84228..84251 of 233562; DR: CCGCAACCCCTTCCCCAGGTGGAACAA]	AGCAAAAAATCCCAGTTTTTTTCA	0528Y_scaffold_17	CCGCAACCCCTTCCCCAGGTGGAACAA	0528Y	3	3	5	0528Y_Rothia_mucilaginosa_59_11	Rothia mucilaginosa	Y
0528Y_scaffold_24|CRISPR|2|spacer|1of22| id=27375434 [location: 207108..207155 of 223726; DR: CCTCAATGAAAGTCCCCGCCCGAAG]	GCGGGAAAATCTGCGCCGTCCACATCATCAGCAAGCTCACTGACCTTG	0528Y_scaffold_24	CCTCAATGAAAGTCCCCGCCCGAAG	0528Y	22	1	5	0528Y_Rothia_mucilaginosa_59_11	Rothia mucilaginosa	Y
0528Y_scaffold_24|CRISPR|2|spacer|2of22| id=27375434 [location: 207181..207227 of 223726; DR: CCTCAATGAAAGTCCCCGCCCGAAG]	GCCGGGAAATCTGTGTCGCGCTCATCCACAGGCGGCGCCGGTGTGCG	0528Y_scaffold_24	CCTCAATGAAAGTCCCCGCCCGAAG	0528Y	22	2	5	0528Y_Rothia_mucilaginosa_59_11	Rothia mucilaginosa	Y
0528Y_scaffold_24|CRISPR|2|spacer|3of22| id=27375434 [location: 207253..207300 of 223726; DR: CCTCAATGAAAGTCCCCGCCCGAAG]	GCGGGGAAATCTTCGGGCATGGGGTCAATGATCCATACGTGCAGGATG	0528Y_scaffold_24	CCTCAATGAAAGTCCCCGCCCGAAG	0528Y	22	3	5	0528Y_Rothia_mucilaginosa_59_11	Rothia mucilaginosa	Y
0528Y_scaffold_24|CRISPR|2|spacer|4of22| id=27375434 [location: 207326..207373 of 223726; DR: CCTCAATGAAAGTCCCCGCCCGAAG]	GCGGAGAAATTTGCAGAGGTGGTCAGCCACATCAAAAGGATTCGCGCA	0528Y_scaffold_24	CCTCAATGAAAGTCCCCGCCCGAAG	0528Y	22	4	5	0528Y_Rothia_mucilaginosa_59_11	Rothia mucilaginosa	Y
0528Y_scaffold_24|CRISPR|2|spacer|5of22| id=27375434 [location: 207399..207445 of 223726; DR: CCTCAATGAAAGTCCCCGCCCGAAG]	GCGGAGAAATGGTTGCCCAGTTTACGCCGATTACTTCGGCTGGATTA	0528Y_scaffold_24	CCTCAATGAAAGTCCCCGCCCGAAG	0528Y	22	5	5	0528Y_Rothia_mucilaginosa_59_11	Rothia mucilaginosa	Y
0528Y_scaffold_24|CRISPR|2|spacer|6of22| id=27375434 [location: 207471..207518 of 223726; DR: CCTCAATGAAAGTCCCCGCCCGAAG]	GCGGGGAAATCCGGCAGGTTCCGGACCGTTGCACCTGCGACTGACGGC	0528Y_scaffold_24	CCTCAATGAAAGTCCCCGCCCGAAG	0528Y	22	6	5	0528Y_Rothia_mucilaginosa_59_11	Rothia mucilaginosa	Y
0528Y_scaffold_24|CRISPR|2|spacer|7of22| id=27375434 [location: 207544..207592 of 223726; DR: CCTCAATGAAAGTCCCCGCCCGAAG]	GCGGGGAAATGTGGAGACGCTACGACCTGTCTCCGAAGCGCTGGGCAAC	0528Y_scaffold_24	CCTCAATGAAAGTCCCCGCCCGAAG	0528Y	22	7	5	0528Y_Rothia_mucilaginosa_59_11	Rothia mucilaginosa	Y
0528Y_scaffold_24|CRISPR|2|spacer|8of22| id=27375434 [location: 207618..207665 of 223726; DR: CCTCAATGAAAGTCCCCGCCCGAAG]	GCGGGGAAATTCTGTGGTTGGAGAACGTGCCCGGCGACGTGCGGCGCC	0528Y_scaffold_24	CCTCAATGAAAGTCCCCGCCCGAAG	0528Y	22	8	5	0528Y_Rothia_mucilaginosa_59_11	Rothia mucilaginosa	Y
0528Y_scaffold_24|CRISPR|2|spacer|9of22| id=27375434 [location: 207691..207739 of 223726; DR: CCTCAATGAAAGTCCCCGCCCGAAG]	GCGGGGAAATTCGCAAGGCGCGGGGCATTACTCCTGCGCAGTGGCGGCA	0528Y_scaffold_24	CCTCAATGAAAGTCCCCGCCCGAAG	0528Y	22	9	5	0528Y_Rothia_mucilaginosa_59_11	Rothia mucilaginosa	Y
0528Y_scaffold_24|CRISPR|2|spacer|10of22| id=27375434 [location: 207765..207812 of 223726; DR: CCTCAATGAAAGTCCCCGCCCGAAG]	GCGGAGAAATCGGCACCGTCGGTATCCTCAGCCAATGCCGAGATTTTG	0528Y_scaffold_24	CCTCAATGAAAGTCCCCGCCCGAAG	0528Y	22	10	5	0528Y_Rothia_mucilaginosa_59_11	Rothia mucilaginosa	Y
0528Y_scaffold_24|CRISPR|2|spacer|11of22| id=27375434 [location: 207838..207883 of 223726; DR: CCTCAATGAAAGTCCCCGCCCGAAG]	ACCGGGAAATGGATACTGCAACACCGAAGTGCAATCCTGCGTGTCG	0528Y_scaffold_24	CCTCAATGAAAGTCCCCGCCCGAAG	0528Y	22	11	5	0528Y_Rothia_mucilaginosa_59_11	Rothia mucilaginosa	Y
0528Y_scaffold_24|CRISPR|2|spacer|12of22| id=27375434 [location: 207909..207954 of 223726; DR: CCTCAATGAAAGTCCCCGCCCGAAG]	GCGGAGAAATGCCGGAACATTGCCCAGCGGCTCAGCGGTTTTATCG	0528Y_scaffold_24	CCTCAATGAAAGTCCCCGCCCGAAG	0528Y	22	12	5	0528Y_Rothia_mucilaginosa_59_11	Rothia mucilaginosa	Y
0528Y_scaffold_24|CRISPR|2|spacer|13of22| id=27375434 [location: 207980..208024 of 223726; DR: CCTCAATGAAAGTCCCCGCCCGAAG]	AGAGAGCATCTCATAATATGCACCTGACTTATTGAATGTATGAGT	0528Y_scaffold_24	CCTCAATGAAAGTCCCCGCCCGAAG	0528Y	22	13	5	0528Y_Rothia_mucilaginosa_59_11	Rothia mucilaginosa	Y
0528Y_scaffold_24|CRISPR|2|spacer|14of22| id=27375434 [location: 208050..208097 of 223726; DR: CCTCAATGAAAGTCCCCGCCCGAAG]	GCGGGGAAATCACGGAGCGCGCGCCAGAGCTCATCAAGAACAACAAAG	0528Y_scaffold_24	CCTCAATGAAAGTCCCCGCCCGAAG	0528Y	22	14	5	0528Y_Rothia_mucilaginosa_59_11	Rothia mucilaginosa	Y
0528Y_scaffold_24|CRISPR|2|spacer|15of22| id=27375434 [location: 208123..208170 of 223726; DR: CCTCAATGAAAGTCCCCGCCCGAAG]	GCGGGGAAATGGTCGTAGAATTCCTGGCTGAGGACGACAACGGAGCGG	0528Y_scaffold_24	CCTCAATGAAAGTCCCCGCCCGAAG	0528Y	22	15	5	0528Y_Rothia_mucilaginosa_59_11	Rothia mucilaginosa	Y
0528Y_scaffold_24|CRISPR|2|spacer|16of22| id=27375434 [location: 208196..208243 of 223726; DR: CCTCAATGAAAGTCCCCGCCCGAAG]	GCGGGGAAATCCGCCGACACCGAGGTAGACTCCCCGGCACTTGGCTAG	0528Y_scaffold_24	CCTCAATGAAAGTCCCCGCCCGAAG	0528Y	22	16	5	0528Y_Rothia_mucilaginosa_59_11	Rothia mucilaginosa	Y
0528Y_scaffold_24|CRISPR|2|spacer|17of22| id=27375434 [location: 208269..208315 of 223726; DR: CCTCAATGAAAGTCCCCGCCCGAAG]	GCGGGGAAATGCTGGAGGCGATGGACGGCATAGCCGACCTGCTGGAG	0528Y_scaffold_24	CCTCAATGAAAGTCCCCGCCCGAAG	0528Y	22	17	5	0528Y_Rothia_mucilaginosa_59_11	Rothia mucilaginosa	Y
0528Y_scaffold_24|CRISPR|2|spacer|18of22| id=27375434 [location: 208341..208385 of 223726; DR: CCTCAATGAAAGTCCCCGCCCGAAG]	GCAGGGAAATGCGTGAAAATCATGTTAACCACGCAGAAGAAAGGG	0528Y_scaffold_24	CCTCAATGAAAGTCCCCGCCCGAAG	0528Y	22	18	5	0528Y_Rothia_mucilaginosa_59_11	Rothia mucilaginosa	Y
0528Y_scaffold_24|CRISPR|2|spacer|19of22| id=27375434 [location: 208411..208458 of 223726; DR: CCTCAATGAAAGTCCCCGCCCGAAG]	GCGGGGAAATTGCCGGTCCAGTGGAAGAAGCGGCCGCGGTCGACGTTG	0528Y_scaffold_24	CCTCAATGAAAGTCCCCGCCCGAAG	0528Y	22	19	5	0528Y_Rothia_mucilaginosa_59_11	Rothia mucilaginosa	Y
0528Y_scaffold_24|CRISPR|2|spacer|20of22| id=27375434 [location: 208484..208530 of 223726; DR: CCTCAATGAAAGTCCCCGCCCGAAG]	GCGGGGAAATGGTGCGTCCCGCATCGATGGCTCGGCTAGCAGTGTTG	0528Y_scaffold_24	CCTCAATGAAAGTCCCCGCCCGAAG	0528Y	22	20	5	0528Y_Rothia_mucilaginosa_59_11	Rothia mucilaginosa	Y
0528Y_scaffold_24|CRISPR|2|spacer|21of22| id=27375434 [location: 208556..208602 of 223726; DR: CCTCAATGAAAGTCCCCGCCCGAAG]	GCGGAGAACTCCGTCTTGTCATGCACACGATGAAAGGCGAATGGGGG	0528Y_scaffold_24	CCTCAATGAAAGTCCCCGCCCGAAG	0528Y	22	21	5	0528Y_Rothia_mucilaginosa_59_11	Rothia mucilaginosa	Y
0528Y_scaffold_24|CRISPR|2|spacer|22of22| id=27375434 [location: 208628..208675 of 223726; DR: CCTCAATGAAAGTCCCCGCCCGAAG]	GTGGAAAAATCCTGCGTCAATGGCGTCTTGGCAACCGTGCTCGCCTGG	0528Y_scaffold_24	CCTCAATGAAAGTCCCCGCCCGAAG	0528Y	22	22	5	0528Y_Rothia_mucilaginosa_59_11	Rothia mucilaginosa	Y
0528Y_scaffold_24|CRISPR|3|spacer|1of38| id=27375434 [location: 211219..211253 of 223726; DR: CCCTCAATGAAAGTCCCTCCGAAAAGGAAGGGAAAT]	CCGTCTCCGCCCTTGAAATCCTCAAACGCAAACCC	0528Y_scaffold_24	CCCTCAATGAAAGTCCCTCCGAAAAGGAAGGGAAAT	0528Y	38	1	5	0528Y_Rothia_mucilaginosa_59_11	Rothia mucilaginosa	Y
0528Y_scaffold_24|CRISPR|3|spacer|2of38| id=27375434 [location: 211290..211326 of 223726; DR: CCCTCAATGAAAGTCCCTCCGAAAAGGAAGGGAAAT]	CCGCAAGGGGGTTCTTTTCCTTCACACCGCCGACAGT	0528Y_scaffold_24	CCCTCAATGAAAGTCCCTCCGAAAAGGAAGGGAAAT	0528Y	38	2	5	0528Y_Rothia_mucilaginosa_59_11	Rothia mucilaginosa	Y
0528Y_scaffold_24|CRISPR|3|spacer|3of38| id=27375434 [location: 211363..211398 of 223726; DR: CCCTCAATGAAAGTCCCTCCGAAAAGGAAGGGAAAT]	GTAGGTCGTATGCCACAGCACCGCCACGTCATCGAG	0528Y_scaffold_24	CCCTCAATGAAAGTCCCTCCGAAAAGGAAGGGAAAT	0528Y	38	3	5	0528Y_Rothia_mucilaginosa_59_11	Rothia mucilaginosa	Y
0528Y_scaffold_24|CRISPR|3|spacer|4of38| id=27375434 [location: 211435..211471 of 223726; DR: CCCTCAATGAAAGTCCCTCCGAAAAGGAAGGGAAAT]	TCGAAGCTATCGGAGCCGTCGTAGAAGACACAATCAA	0528Y_scaffold_24	CCCTCAATGAAAGTCCCTCCGAAAAGGAAGGGAAAT	0528Y	38	4	5	0528Y_Rothia_mucilaginosa_59_11	Rothia mucilaginosa	Y
0528Y_scaffold_24|CRISPR|3|spacer|5of38| id=27375434 [location: 211508..211544 of 223726; DR: CCCTCAATGAAAGTCCCTCCGAAAAGGAAGGGAAAT]	TGTCGGGGATTTGGGGTGCCCCGTAGAGGGTGACGGC	0528Y_scaffold_24	CCCTCAATGAAAGTCCCTCCGAAAAGGAAGGGAAAT	0528Y	38	5	5	0528Y_Rothia_mucilaginosa_59_11	Rothia mucilaginosa	Y
0528Y_scaffold_24|CRISPR|3|spacer|6of38| id=27375434 [location: 211581..211620 of 223726; DR: CCCTCAATGAAAGTCCCTCCGAAAAGGAAGGGAAAT]	CGCCGCCTCCTGGACGAAGGCATGCCGGGCCAGTGCCGTC	0528Y_scaffold_24	CCCTCAATGAAAGTCCCTCCGAAAAGGAAGGGAAAT	0528Y	38	6	5	0528Y_Rothia_mucilaginosa_59_11	Rothia mucilaginosa	Y
0528Y_scaffold_24|CRISPR|3|spacer|7of38| id=27375434 [location: 211657..211693 of 223726; DR: CCCTCAATGAAAGTCCCTCCGAAAAGGAAGGGAAAT]	TGAGCTTCCACGCGACATACGAGGTGCACTCACCAAA	0528Y_scaffold_24	CCCTCAATGAAAGTCCCTCCGAAAAGGAAGGGAAAT	0528Y	38	7	5	0528Y_Rothia_mucilaginosa_59_11	Rothia mucilaginosa	Y
0528Y_scaffold_24|CRISPR|3|spacer|8of38| id=27375434 [location: 211730..211765 of 223726; DR: CCCTCAATGAAAGTCCCTCCGAAAAGGAAGGGAAAT]	TTTCTTGAAGTCTTGAGCCATGCCGCCGTGGACGTA	0528Y_scaffold_24	CCCTCAATGAAAGTCCCTCCGAAAAGGAAGGGAAAT	0528Y	38	8	5	0528Y_Rothia_mucilaginosa_59_11	Rothia mucilaginosa	Y
0528Y_scaffold_24|CRISPR|3|spacer|9of38| id=27375434 [location: 211802..211836 of 223726; DR: CCCTCAATGAAAGTCCCTCCGAAAAGGAAGGGAAAT]	GCAACCATTGTAAACCGAAGGCCAAGCCGCTGATA	0528Y_scaffold_24	CCCTCAATGAAAGTCCCTCCGAAAAGGAAGGGAAAT	0528Y	38	9	5	0528Y_Rothia_mucilaginosa_59_11	Rothia mucilaginosa	Y
0528Y_scaffold_24|CRISPR|3|spacer|10of38| id=27375434 [location: 211873..211908 of 223726; DR: CCCTCAATGAAAGTCCCTCCGAAAAGGAAGGGAAAT]	AGGCGCTTAGCGGTTGTTGTTTCCTAGCGCGTCGTA	0528Y_scaffold_24	CCCTCAATGAAAGTCCCTCCGAAAAGGAAGGGAAAT	0528Y	38	10	5	0528Y_Rothia_mucilaginosa_59_11	Rothia mucilaginosa	Y
0528Y_scaffold_24|CRISPR|3|spacer|11of38| id=27375434 [location: 211945..211979 of 223726; DR: CCCTCAATGAAAGTCCCTCCGAAAAGGAAGGGAAAT]	GATGCGATGACCAAGACCTATGCCTTCGCGGGCTC	0528Y_scaffold_24	CCCTCAATGAAAGTCCCTCCGAAAAGGAAGGGAAAT	0528Y	38	11	5	0528Y_Rothia_mucilaginosa_59_11	Rothia mucilaginosa	Y
0528Y_scaffold_24|CRISPR|3|spacer|12of38| id=27375434 [location: 212016..212052 of 223726; DR: CCCTCAATGAAAGTCCCTCCGAAAAGGAAGGGAAAT]	GCGTCACCGACGATACCCCCGACGTGGCATACGCCCC	0528Y_scaffold_24	CCCTCAATGAAAGTCCCTCCGAAAAGGAAGGGAAAT	0528Y	38	12	5	0528Y_Rothia_mucilaginosa_59_11	Rothia mucilaginosa	Y
0528Y_scaffold_24|CRISPR|3|spacer|13of38| id=27375434 [location: 212089..212125 of 223726; DR: CCCTCAATGAAAGTCCCTCCGAAAAGGAAGGGAAAT]	TGTCGTAAGCGCCCGAAATGTAGAGGCAGAGGTGGGT	0528Y_scaffold_24	CCCTCAATGAAAGTCCCTCCGAAAAGGAAGGGAAAT	0528Y	38	13	5	0528Y_Rothia_mucilaginosa_59_11	Rothia mucilaginosa	Y
0528Y_scaffold_24|CRISPR|3|spacer|14of38| id=27375434 [location: 212162..212199 of 223726; DR: CCCTCAATGAAAGTCCCTCCGAAAAGGAAGGGAAAT]	GCCTGCGGCGATACATACCGTTGGCGCGGCCACGTTGT	0528Y_scaffold_24	CCCTCAATGAAAGTCCCTCCGAAAAGGAAGGGAAAT	0528Y	38	14	5	0528Y_Rothia_mucilaginosa_59_11	Rothia mucilaginosa	Y
0528Y_scaffold_24|CRISPR|3|spacer|15of38| id=27375434 [location: 212236..212271 of 223726; DR: CCCTCAATGAAAGTCCCTCCGAAAAGGAAGGGAAAT]	TCTCATAATATACACCTGTCTCACTCAGTGCATGAG	0528Y_scaffold_24	CCCTCAATGAAAGTCCCTCCGAAAAGGAAGGGAAAT	0528Y	38	15	5	0528Y_Rothia_mucilaginosa_59_11	Rothia mucilaginosa	Y
0528Y_scaffold_24|CRISPR|3|spacer|16of38| id=27375434 [location: 212308..212344 of 223726; DR: CCCTCAATGAAAGTCCCTCCGAAAAGGAAGGGAAAT]	ACCCCAAAAACAACCCAACAACCCGCGCATGGGTACG	0528Y_scaffold_24	CCCTCAATGAAAGTCCCTCCGAAAAGGAAGGGAAAT	0528Y	38	16	5	0528Y_Rothia_mucilaginosa_59_11	Rothia mucilaginosa	Y
0528Y_scaffold_24|CRISPR|3|spacer|17of38| id=27375434 [location: 212381..212419 of 223726; DR: CCCTCAATGAAAGTCCCTCCGAAAAGGAAGGGAAAT]	CCCGTCATGGAAGACCACGCGCGGGTGTGCAGCGTTGAA	0528Y_scaffold_24	CCCTCAATGAAAGTCCCTCCGAAAAGGAAGGGAAAT	0528Y	38	17	5	0528Y_Rothia_mucilaginosa_59_11	Rothia mucilaginosa	Y
0528Y_scaffold_24|CRISPR|3|spacer|18of38| id=27375434 [location: 212456..212494 of 223726; DR: CCCTCAATGAAAGTCCCTCCGAAAAGGAAGGGAAAT]	CTTGAACGCGGCCGCATAGATCAGCGAGGCCACGGGCTT	0528Y_scaffold_24	CCCTCAATGAAAGTCCCTCCGAAAAGGAAGGGAAAT	0528Y	38	18	5	0528Y_Rothia_mucilaginosa_59_11	Rothia mucilaginosa	Y
0528Y_scaffold_24|CRISPR|3|spacer|19of38| id=27375434 [location: 212531..212567 of 223726; DR: CCCTCAATGAAAGTCCCTCCGAAAAGGAAGGGAAAT]	TGAGTCTTCACCATTTCGCCGCCGCTAATAAACGGCT	0528Y_scaffold_24	CCCTCAATGAAAGTCCCTCCGAAAAGGAAGGGAAAT	0528Y	38	19	5	0528Y_Rothia_mucilaginosa_59_11	Rothia mucilaginosa	Y
0528Y_scaffold_24|CRISPR|3|spacer|20of38| id=27375434 [location: 212604..212639 of 223726; DR: CCCTCAATGAAAGTCCCTCCGAAAAGGAAGGGAAAT]	TTTGGTGCGGGTGTGCTCTCCGCGGCGGCCGTCCCA	0528Y_scaffold_24	CCCTCAATGAAAGTCCCTCCGAAAAGGAAGGGAAAT	0528Y	38	20	5	0528Y_Rothia_mucilaginosa_59_11	Rothia mucilaginosa	Y
0528Y_scaffold_24|CRISPR|3|spacer|21of38| id=27375434 [location: 212676..212710 of 223726; DR: CCCTCAATGAAAGTCCCTCCGAAAAGGAAGGGAAAT]	TGGAGGGCCTCGCTAACGCTGGTTCGACGGACACG	0528Y_scaffold_24	CCCTCAATGAAAGTCCCTCCGAAAAGGAAGGGAAAT	0528Y	38	21	5	0528Y_Rothia_mucilaginosa_59_11	Rothia mucilaginosa	Y
0528Y_scaffold_24|CRISPR|3|spacer|22of38| id=27375434 [location: 212747..212783 of 223726; DR: CCCTCAATGAAAGTCCCTCCGAAAAGGAAGGGAAAT]	GGAGTGCCTAGGCTGAGGATTTGAAAGAGCCTTCTGG	0528Y_scaffold_24	CCCTCAATGAAAGTCCCTCCGAAAAGGAAGGGAAAT	0528Y	38	22	5	0528Y_Rothia_mucilaginosa_59_11	Rothia mucilaginosa	Y
0528Y_scaffold_24|CRISPR|3|spacer|23of38| id=27375434 [location: 212820..212855 of 223726; DR: CCCTCAATGAAAGTCCCTCCGAAAAGGAAGGGAAAT]	GAACCAGACGTAGCCGTTGTTAGCGACATAGCCGTC	0528Y_scaffold_24	CCCTCAATGAAAGTCCCTCCGAAAAGGAAGGGAAAT	0528Y	38	23	5	0528Y_Rothia_mucilaginosa_59_11	Rothia mucilaginosa	Y
0528Y_scaffold_24|CRISPR|3|spacer|24of38| id=27375434 [location: 212892..212928 of 223726; DR: CCCTCAATGAAAGTCCCTCCGAAAAGGAAGGGAAAT]	TGACCTGGTCAGCAGGAATAGTGCGGGTGCCGTAGGC	0528Y_scaffold_24	CCCTCAATGAAAGTCCCTCCGAAAAGGAAGGGAAAT	0528Y	38	24	5	0528Y_Rothia_mucilaginosa_59_11	Rothia mucilaginosa	Y
0528Y_scaffold_24|CRISPR|3|spacer|25of38| id=27375434 [location: 212965..213003 of 223726; DR: CCCTCAATGAAAGTCCCTCCGAAAAGGAAGGGAAAT]	CCGGGGCGGATACTGAGCGGCCCGGCCTTGGCACCGTTG	0528Y_scaffold_24	CCCTCAATGAAAGTCCCTCCGAAAAGGAAGGGAAAT	0528Y	38	25	5	0528Y_Rothia_mucilaginosa_59_11	Rothia mucilaginosa	Y
0528Y_scaffold_24|CRISPR|3|spacer|26of38| id=27375434 [location: 213040..213074 of 223726; DR: CCCTCAATGAAAGTCCCTCCGAAAAGGAAGGGAAAT]	AGCTGGTGGGTTGCCAGGGTGGCATGCACAGTCGC	0528Y_scaffold_24	CCCTCAATGAAAGTCCCTCCGAAAAGGAAGGGAAAT	0528Y	38	26	5	0528Y_Rothia_mucilaginosa_59_11	Rothia mucilaginosa	Y
0528Y_scaffold_24|CRISPR|3|spacer|27of38| id=27375434 [location: 213111..213147 of 223726; DR: CCCTCAATGAAAGTCCCTCCGAAAAGGAAGGGAAAT]	TCGCGCCGCTGACGGACGATAACGGCAACCCGATCGA	0528Y_scaffold_24	CCCTCAATGAAAGTCCCTCCGAAAAGGAAGGGAAAT	0528Y	38	27	5	0528Y_Rothia_mucilaginosa_59_11	Rothia mucilaginosa	Y
0528Y_scaffold_24|CRISPR|3|spacer|28of38| id=27375434 [location: 213184..213221 of 223726; DR: CCCTCAATGAAAGTCCCTCCGAAAAGGAAGGGAAAT]	TCGCCGTTGCGCTCAGGGAAATAATAGCGGAACGCCTC	0528Y_scaffold_24	CCCTCAATGAAAGTCCCTCCGAAAAGGAAGGGAAAT	0528Y	38	28	5	0528Y_Rothia_mucilaginosa_59_11	Rothia mucilaginosa	Y
0528Y_scaffold_24|CRISPR|3|spacer|29of38| id=27375434 [location: 213258..213290 of 223726; DR: CCCTCAATGAAAGTCCCTCCGAAAAGGAAGGGAAAT]	TGGCCCGACAATTGAGAACCTGCGGGTTTGCGG	0528Y_scaffold_24	CCCTCAATGAAAGTCCCTCCGAAAAGGAAGGGAAAT	0528Y	38	29	5	0528Y_Rothia_mucilaginosa_59_11	Rothia mucilaginosa	Y
0528Y_scaffold_24|CRISPR|3|spacer|30of38| id=27375434 [location: 213327..213363 of 223726; DR: CCCTCAATGAAAGTCCCTCCGAAAAGGAAGGGAAAT]	CCTGGGCGACCAAGATCTTGTCCGCAGGCTGCTGCTT	0528Y_scaffold_24	CCCTCAATGAAAGTCCCTCCGAAAAGGAAGGGAAAT	0528Y	38	30	5	0528Y_Rothia_mucilaginosa_59_11	Rothia mucilaginosa	Y
0528Y_scaffold_24|CRISPR|3|spacer|31of38| id=27375434 [location: 213400..213436 of 223726; DR: CCCTCAATGAAAGTCCCTCCGAAAAGGAAGGGAAAT]	CTGCGTTGGCTCGTGAGGGCATGCTCGGCGAATCTGA	0528Y_scaffold_24	CCCTCAATGAAAGTCCCTCCGAAAAGGAAGGGAAAT	0528Y	38	31	5	0528Y_Rothia_mucilaginosa_59_11	Rothia mucilaginosa	Y
0528Y_scaffold_24|CRISPR|3|spacer|32of38| id=27375434 [location: 213473..213507 of 223726; DR: CCCTCAATGAAAGTCCCTCCGAAAAGGAAGGGAAAT]	GACCAGGCAGGTTTCACCCCCGGGACCGATGCCTG	0528Y_scaffold_24	CCCTCAATGAAAGTCCCTCCGAAAAGGAAGGGAAAT	0528Y	38	32	5	0528Y_Rothia_mucilaginosa_59_11	Rothia mucilaginosa	Y
0528Y_scaffold_24|CRISPR|3|spacer|33of38| id=27375434 [location: 213544..213580 of 223726; DR: CCCTCAATGAAAGTCCCTCCGAAAAGGAAGGGAAAT]	CTTCTTGCTGCTGGCGGCTATCGTGCTTGTGCTCGCT	0528Y_scaffold_24	CCCTCAATGAAAGTCCCTCCGAAAAGGAAGGGAAAT	0528Y	38	33	5	0528Y_Rothia_mucilaginosa_59_11	Rothia mucilaginosa	Y
0528Y_scaffold_24|CRISPR|3|spacer|34of38| id=27375434 [location: 213617..213650 of 223726; DR: CCCTCAATGAAAGTCCCTCCGAAAAGGAAGGGAAAT]	ACAACCCCGGAGTTCACATCCACCTCACCCAAAT	0528Y_scaffold_24	CCCTCAATGAAAGTCCCTCCGAAAAGGAAGGGAAAT	0528Y	38	34	5	0528Y_Rothia_mucilaginosa_59_11	Rothia mucilaginosa	Y
0528Y_scaffold_24|CRISPR|3|spacer|35of38| id=27375434 [location: 213687..213722 of 223726; DR: CCCTCAATGAAAGTCCCTCCGAAAAGGAAGGGAAAT]	GGCTCACCTTGGGCACGAACCCGAACGCAGTTGAGG	0528Y_scaffold_24	CCCTCAATGAAAGTCCCTCCGAAAAGGAAGGGAAAT	0528Y	38	35	5	0528Y_Rothia_mucilaginosa_59_11	Rothia mucilaginosa	Y
0528Y_scaffold_24|CRISPR|3|spacer|36of38| id=27375434 [location: 213759..213795 of 223726; DR: CCCTCAATGAAAGTCCCTCCGAAAAGGAAGGGAAAT]	CATGAGTTCACGGCTTGAGTTTTCGTGTGCTTGAGAA	0528Y_scaffold_24	CCCTCAATGAAAGTCCCTCCGAAAAGGAAGGGAAAT	0528Y	38	36	5	0528Y_Rothia_mucilaginosa_59_11	Rothia mucilaginosa	Y
0528Y_scaffold_24|CRISPR|3|spacer|37of38| id=27375434 [location: 213832..213868 of 223726; DR: CCCTCAATGAAAGTCCCTCCGAAAAGGAAGGGAAAT]	TTATCAATCTTGAATTTAGTCGCATATTCACCGGCCG	0528Y_scaffold_24	CCCTCAATGAAAGTCCCTCCGAAAAGGAAGGGAAAT	0528Y	38	37	5	0528Y_Rothia_mucilaginosa_59_11	Rothia mucilaginosa	Y
0528Y_scaffold_24|CRISPR|3|spacer|38of38| id=27375434 [location: 213905..213942 of 223726; DR: CCCTCAATGAAAGTCCCTCCGAAAAGGAAGGGAAAT]	CCCACGCCAGGGCACACAAAAAGGGGCGGGTACATCAT	0528Y_scaffold_24	CCCTCAATGAAAGTCCCTCCGAAAAGGAAGGGAAAT	0528Y	38	38	5	0528Y_Rothia_mucilaginosa_59_11	Rothia mucilaginosa	Y
JBBB003D_scaffold_60|CRISPR|1|spacer|1of4| id=27790514 [location: 52856..52885 of 111508; DR: GTTTTGGTACCATTCTAAACAACATGACTCTAAAAC]	AAATTTTTTGAACTTAATGCAATTTCTTGA	JBBB003D_scaffold_60	GTTTTGGTACCATTCTAAACAACATGACTCTAAAAC	0519A0210	4	1	5	0519A0210_Enterococcus_faecalis_37_406	Enterococcus faecalis	A
JBBB003D_scaffold_60|CRISPR|1|spacer|2of4| id=27790514 [location: 52922..52951 of 111508; DR: GTTTTGGTACCATTCTAAACAACATGACTCTAAAAC]	AAAACTTTTGACGGCTCTTTAGTCAACCCA	JBBB003D_scaffold_60	GTTTTGGTACCATTCTAAACAACATGACTCTAAAAC	0519A0210	4	2	5	0519A0210_Enterococcus_faecalis_37_406	Enterococcus faecalis	A
JBBB003D_scaffold_60|CRISPR|1|spacer|3of4| id=27790514 [location: 52988..53017 of 111508; DR: GTTTTGGTACCATTCTAAACAACATGACTCTAAAAC]	GGAGAAATGTAGCTGCTGTTTTGACATTAG	JBBB003D_scaffold_60	GTTTTGGTACCATTCTAAACAACATGACTCTAAAAC	0519A0210	4	3	5	0519A0210_Enterococcus_faecalis_37_406	Enterococcus faecalis	A
JBBB003D_scaffold_60|CRISPR|1|spacer|4of4| id=27790514 [location: 53054..53083 of 111508; DR: GTTTTGGTACCATTCTAAACAACATGACTCTAAAAC]	TGTTTCATCGTCCTTTCTATTTGGGAAGTG	JBBB003D_scaffold_60	GTTTTGGTACCATTCTAAACAACATGACTCTAAAAC	0519A0210	4	4	5	0519A0210_Enterococcus_faecalis_37_406	Enterococcus faecalis	A
JBBB003G_scaffold_5|CRISPR|1|spacer|1of39| id=27794659 [location: 153280..153315 of 423185; DR: GTTTTATATTAACTATGAGGAATGTAAAT]	TAACAACCTAAAGGAATAGTAACATTAACATTTTTT	JBBB003G_scaffold_5	GTTTTATATTAACTATGAGGAATGTAAAT	0522A0213	39	1	5	0522A0213_Clostridium_perfringens_28_397	Clostridium perfringens	A
JBBB003G_scaffold_5|CRISPR|1|spacer|2of39| id=27794659 [location: 153345..153380 of 423185; DR: GTTTTATATTAACTATGAGGAATGTAAAT]	TAACCAATTGTAAGAACACCACCACTATCTCGATAT	JBBB003G_scaffold_5	GTTTTATATTAACTATGAGGAATGTAAAT	0522A0213	39	2	5	0522A0213_Clostridium_perfringens_28_397	Clostridium perfringens	A
JBBB003G_scaffold_5|CRISPR|1|spacer|3of39| id=27794659 [location: 153410..153446 of 423185; DR: GTTTTATATTAACTATGAGGAATGTAAAT]	CCATATAGGTTATTCCAACTTGTTCTAAGTCTATCTA	JBBB003G_scaffold_5	GTTTTATATTAACTATGAGGAATGTAAAT	0522A0213	39	3	5	0522A0213_Clostridium_perfringens_28_397	Clostridium perfringens	A
JBBB003G_scaffold_5|CRISPR|1|spacer|4of39| id=27794659 [location: 153476..153511 of 423185; DR: GTTTTATATTAACTATGAGGAATGTAAAT]	TAATAGAAAGGTGAGTTTATATGAATATAGATATAA	JBBB003G_scaffold_5	GTTTTATATTAACTATGAGGAATGTAAAT	0522A0213	39	4	5	0522A0213_Clostridium_perfringens_28_397	Clostridium perfringens	A
JBBB003G_scaffold_5|CRISPR|1|spacer|5of39| id=27794659 [location: 153541..153576 of 423185; DR: GTTTTATATTAACTATGAGGAATGTAAAT]	CAATAACTTTAACACTAATATCAAATACAATAAAAG	JBBB003G_scaffold_5	GTTTTATATTAACTATGAGGAATGTAAAT	0522A0213	39	5	5	0522A0213_Clostridium_perfringens_28_397	Clostridium perfringens	A
JBBB003G_scaffold_5|CRISPR|1|spacer|6of39| id=27794659 [location: 153606..153641 of 423185; DR: GTTTTATATTAACTATGAGGAATGTAAAT]	TTGGTTAGAATTTAAAAATTTATATTTTAACAGAAA	JBBB003G_scaffold_5	GTTTTATATTAACTATGAGGAATGTAAAT	0522A0213	39	6	5	0522A0213_Clostridium_perfringens_28_397	Clostridium perfringens	A
JBBB003G_scaffold_5|CRISPR|1|spacer|7of39| id=27794659 [location: 153671..153706 of 423185; DR: GTTTTATATTAACTATGAGGAATGTAAAT]	GTATAGCATTAGTCTTGTATTGCTCTCCGCTTATTA	JBBB003G_scaffold_5	GTTTTATATTAACTATGAGGAATGTAAAT	0522A0213	39	7	5	0522A0213_Clostridium_perfringens_28_397	Clostridium perfringens	A
JBBB003G_scaffold_5|CRISPR|1|spacer|8of39| id=27794659 [location: 153736..153772 of 423185; DR: GTTTTATATTAACTATGAGGAATGTAAAT]	CGGAATGGATTTATTAATTCTAGGCACACAATAGAAA	JBBB003G_scaffold_5	GTTTTATATTAACTATGAGGAATGTAAAT	0522A0213	39	8	5	0522A0213_Clostridium_perfringens_28_397	Clostridium perfringens	A
JBBB003G_scaffold_5|CRISPR|1|spacer|9of39| id=27794659 [location: 153802..153837 of 423185; DR: GTTTTATATTAACTATGAGGAATGTAAAT]	ACAGTTATTTACTATGAATTAGCAGAACCAGTTGAA	JBBB003G_scaffold_5	GTTTTATATTAACTATGAGGAATGTAAAT	0522A0213	39	9	5	0522A0213_Clostridium_perfringens_28_397	Clostridium perfringens	A
JBBB003G_scaffold_5|CRISPR|1|spacer|10of39| id=27794659 [location: 153867..153902 of 423185; DR: GTTTTATATTAACTATGAGGAATGTAAAT]	ACAAGAATTTTTAGATATTAGGAGGTAATTGTTTTA	JBBB003G_scaffold_5	GTTTTATATTAACTATGAGGAATGTAAAT	0522A0213	39	10	5	0522A0213_Clostridium_perfringens_28_397	Clostridium perfringens	A
JBBB003G_scaffold_5|CRISPR|1|spacer|11of39| id=27794659 [location: 153932..153967 of 423185; DR: GTTTTATATTAACTATGAGGAATGTAAAT]	CAGCTTGAAGAAGAAGTTAAGAAGAAATTGGATAGA	JBBB003G_scaffold_5	GTTTTATATTAACTATGAGGAATGTAAAT	0522A0213	39	11	5	0522A0213_Clostridium_perfringens_28_397	Clostridium perfringens	A
JBBB003G_scaffold_5|CRISPR|1|spacer|12of39| id=27794659 [location: 153997..154033 of 423185; DR: GTTTTATATTAACTATGAGGAATGTAAAT]	GCAGCTAGAGCATCATTAGCTGGTAAAAAGGCAGAAG	JBBB003G_scaffold_5	GTTTTATATTAACTATGAGGAATGTAAAT	0522A0213	39	12	5	0522A0213_Clostridium_perfringens_28_397	Clostridium perfringens	A
JBBB003G_scaffold_5|CRISPR|1|spacer|13of39| id=27794659 [location: 154063..154099 of 423185; DR: GTTTTATATTAACTATGAGGAATGTAAAT]	GTTCCAGATTACTTAACACTTCTAAAATATGTAGACC	JBBB003G_scaffold_5	GTTTTATATTAACTATGAGGAATGTAAAT	0522A0213	39	13	5	0522A0213_Clostridium_perfringens_28_397	Clostridium perfringens	A
JBBB003G_scaffold_5|CRISPR|1|spacer|14of39| id=27794659 [location: 154129..154164 of 423185; DR: GTTTTATATTAACTATGAGGAATGTAAAT]	GAGGAATATATACAGTTTGCAGTTGATAATGGAATG	JBBB003G_scaffold_5	GTTTTATATTAACTATGAGGAATGTAAAT	0522A0213	39	14	5	0522A0213_Clostridium_perfringens_28_397	Clostridium perfringens	A
JBBB003G_scaffold_5|CRISPR|1|spacer|15of39| id=27794659 [location: 154194..154229 of 423185; DR: GTTTTATATTAACTATGAGGAATGTAAAT]	ATTTCTGTTCCAGTGAATTTTTTTAAAGTTAATATT	JBBB003G_scaffold_5	GTTTTATATTAACTATGAGGAATGTAAAT	0522A0213	39	15	5	0522A0213_Clostridium_perfringens_28_397	Clostridium perfringens	A
JBBB003G_scaffold_5|CRISPR|1|spacer|16of39| id=27794659 [location: 154259..154294 of 423185; DR: GTTTTATATTAACTATGAGGAATGTAAAT]	ATTAGTATAACAAGTCAAGAAAAATTTACATAAAAA	JBBB003G_scaffold_5	GTTTTATATTAACTATGAGGAATGTAAAT	0522A0213	39	16	5	0522A0213_Clostridium_perfringens_28_397	Clostridium perfringens	A
JBBB003G_scaffold_5|CRISPR|1|spacer|17of39| id=27794659 [location: 154324..154360 of 423185; DR: GTTTTATATTAACTATGAGGAATGTAAAT]	TAGAATTTTCAAGATTTAGTATCTCGCTCATAGTTTG	JBBB003G_scaffold_5	GTTTTATATTAACTATGAGGAATGTAAAT	0522A0213	39	17	5	0522A0213_Clostridium_perfringens_28_397	Clostridium perfringens	A
JBBB003G_scaffold_5|CRISPR|1|spacer|18of39| id=27794659 [location: 154390..154425 of 423185; DR: GTTTTATATTAACTATGAGGAATGTAAAT]	GTTAAAGATAAAGACGGAATAATAGCTGACGGTTCT	JBBB003G_scaffold_5	GTTTTATATTAACTATGAGGAATGTAAAT	0522A0213	39	18	5	0522A0213_Clostridium_perfringens_28_397	Clostridium perfringens	A
JBBB003G_scaffold_5|CRISPR|1|spacer|19of39| id=27794659 [location: 154455..154490 of 423185; DR: GTTTTATATTAACTATGAGGAATGTAAAT]	GGCTTAAAATTAAAGTCTAAATCATAAAGACCAACT	JBBB003G_scaffold_5	GTTTTATATTAACTATGAGGAATGTAAAT	0522A0213	39	19	5	0522A0213_Clostridium_perfringens_28_397	Clostridium perfringens	A
JBBB003G_scaffold_5|CRISPR|1|spacer|20of39| id=27794659 [location: 154520..154555 of 423185; DR: GTTTTATATTAACTATGAGGAATGTAAAT]	CTCTTATTTTTATATTTTCTATTAATCCAGCTTTCA	JBBB003G_scaffold_5	GTTTTATATTAACTATGAGGAATGTAAAT	0522A0213	39	20	5	0522A0213_Clostridium_perfringens_28_397	Clostridium perfringens	A
JBBB003G_scaffold_5|CRISPR|1|spacer|21of39| id=27794659 [location: 154585..154620 of 423185; DR: GTTTTATATTAACTATGAGGAATGTAAAT]	ATATTTAAAGATGCTAAAATACAGATTAATGGCAAG	JBBB003G_scaffold_5	GTTTTATATTAACTATGAGGAATGTAAAT	0522A0213	39	21	5	0522A0213_Clostridium_perfringens_28_397	Clostridium perfringens	A
JBBB003G_scaffold_5|CRISPR|1|spacer|22of39| id=27794659 [location: 154650..154685 of 423185; DR: GTTTTATATTAACTATGAGGAATGTAAAT]	GAATTAAAAAACGTTAAGCTTACACAATTTAAATTC	JBBB003G_scaffold_5	GTTTTATATTAACTATGAGGAATGTAAAT	0522A0213	39	22	5	0522A0213_Clostridium_perfringens_28_397	Clostridium perfringens	A
JBBB003G_scaffold_5|CRISPR|1|spacer|23of39| id=27794659 [location: 154715..154751 of 423185; DR: GTTTTATATTAACTATGAGGAATGTAAAT]	ACAGACAAGTAAAGGGGGTTCGTGGCAAGCCACTCAC	JBBB003G_scaffold_5	GTTTTATATTAACTATGAGGAATGTAAAT	0522A0213	39	23	5	0522A0213_Clostridium_perfringens_28_397	Clostridium perfringens	A
JBBB003G_scaffold_5|CRISPR|1|spacer|24of39| id=27794659 [location: 154781..154816 of 423185; DR: GTTTTATATTAACTATGAGGAATGTAAAT]	GTTGATAAACCTATAAGTGGAATTGGTGAAAATATA	JBBB003G_scaffold_5	GTTTTATATTAACTATGAGGAATGTAAAT	0522A0213	39	24	5	0522A0213_Clostridium_perfringens_28_397	Clostridium perfringens	A
JBBB003G_scaffold_5|CRISPR|1|spacer|25of39| id=27794659 [location: 154846..154881 of 423185; DR: GTTTTATATTAACTATGAGGAATGTAAAT]	TTTGCTAGTGAGTTTTATGATGATTTGAAAGAAAAT	JBBB003G_scaffold_5	GTTTTATATTAACTATGAGGAATGTAAAT	0522A0213	39	25	5	0522A0213_Clostridium_perfringens_28_397	Clostridium perfringens	A
JBBB003G_scaffold_5|CRISPR|1|spacer|26of39| id=27794659 [location: 154911..154947 of 423185; DR: GTTTTATATTAACTATGAGGAATGTAAAT]	TTACGATTCTGAGTCAAAAGAGTAAGCAACTCAACAG	JBBB003G_scaffold_5	GTTTTATATTAACTATGAGGAATGTAAAT	0522A0213	39	26	5	0522A0213_Clostridium_perfringens_28_397	Clostridium perfringens	A
JBBB003G_scaffold_5|CRISPR|1|spacer|27of39| id=27794659 [location: 154977..155012 of 423185; DR: GTTTTATATTAACTATGAGGAATGTAAAT]	AAATAAAATTACGAGTTTAAAAATTGTAAGTGCTTA	JBBB003G_scaffold_5	GTTTTATATTAACTATGAGGAATGTAAAT	0522A0213	39	27	5	0522A0213_Clostridium_perfringens_28_397	Clostridium perfringens	A
JBBB003G_scaffold_5|CRISPR|1|spacer|28of39| id=27794659 [location: 155042..155078 of 423185; DR: GTTTTATATTAACTATGAGGAATGTAAAT]	TCAAGTAAATTTATAGAAGTAGTTTATCCTAGTGGAA	JBBB003G_scaffold_5	GTTTTATATTAACTATGAGGAATGTAAAT	0522A0213	39	28	5	0522A0213_Clostridium_perfringens_28_397	Clostridium perfringens	A
JBBB003G_scaffold_5|CRISPR|1|spacer|29of39| id=27794659 [location: 155108..155144 of 423185; DR: GTTTTATATTAACTATGAGGAATGTAAAT]	TACTCATTAGATGGGATTATAGGGAATACACTAGGTG	JBBB003G_scaffold_5	GTTTTATATTAACTATGAGGAATGTAAAT	0522A0213	39	29	5	0522A0213_Clostridium_perfringens_28_397	Clostridium perfringens	A
JBBB003G_scaffold_5|CRISPR|1|spacer|30of39| id=27794659 [location: 155174..155209 of 423185; DR: GTTTTATATTAACTATGAGGAATGTAAAT]	CCAAAAATTTAATCATATTTATATATAATTATTATA	JBBB003G_scaffold_5	GTTTTATATTAACTATGAGGAATGTAAAT	0522A0213	39	30	5	0522A0213_Clostridium_perfringens_28_397	Clostridium perfringens	A
JBBB003G_scaffold_5|CRISPR|1|spacer|31of39| id=27794659 [location: 155239..155274 of 423185; DR: GTTTTATATTAACTATGAGGAATGTAAAT]	CATACAGAATGGTTTGAAGAAGAACTTAAAATTAAA	JBBB003G_scaffold_5	GTTTTATATTAACTATGAGGAATGTAAAT	0522A0213	39	31	5	0522A0213_Clostridium_perfringens_28_397	Clostridium perfringens	A
JBBB003G_scaffold_5|CRISPR|1|spacer|32of39| id=27794659 [location: 155304..155340 of 423185; DR: GTTTTATATTAACTATGAGGAATGTAAAT]	CTTTATAAAGGTGATGAAAACAAAGTTTTTGATGTTG	JBBB003G_scaffold_5	GTTTTATATTAACTATGAGGAATGTAAAT	0522A0213	39	32	5	0522A0213_Clostridium_perfringens_28_397	Clostridium perfringens	A
JBBB003G_scaffold_5|CRISPR|1|spacer|33of39| id=27794659 [location: 155370..155405 of 423185; DR: GTTTTATATTAACTATGAGGAATGTAAAT]	CAATATCTATAGGTAATAAGATGATGCCAGTTATTG	JBBB003G_scaffold_5	GTTTTATATTAACTATGAGGAATGTAAAT	0522A0213	39	33	5	0522A0213_Clostridium_perfringens_28_397	Clostridium perfringens	A
JBBB003G_scaffold_5|CRISPR|1|spacer|34of39| id=27794659 [location: 155435..155470 of 423185; DR: GTTTTATATTAACTATGAGGAATGTAAAT]	ATAGCAGTAGTTGGAGCTAAATCATTAAAAATCAAA	JBBB003G_scaffold_5	GTTTTATATTAACTATGAGGAATGTAAAT	0522A0213	39	34	5	0522A0213_Clostridium_perfringens_28_397	Clostridium perfringens	A
JBBB003G_scaffold_5|CRISPR|1|spacer|35of39| id=27794659 [location: 155500..155535 of 423185; DR: GTTTTATATTAACTATGAGGAATGTAAAT]	ACATAAGAATAGATGCTTCTATCGAAAGAGCTTTTA	JBBB003G_scaffold_5	GTTTTATATTAACTATGAGGAATGTAAAT	0522A0213	39	35	5	0522A0213_Clostridium_perfringens_28_397	Clostridium perfringens	A
JBBB003G_scaffold_5|CRISPR|1|spacer|36of39| id=27794659 [location: 155565..155600 of 423185; DR: GTTTTATATTAACTATGAGGAATGTAAAT]	CTCATTATTAAATGATGATGTATTCTAACAGCTTTA	JBBB003G_scaffold_5	GTTTTATATTAACTATGAGGAATGTAAAT	0522A0213	39	36	5	0522A0213_Clostridium_perfringens_28_397	Clostridium perfringens	A
JBBB003G_scaffold_5|CRISPR|1|spacer|37of39| id=27794659 [location: 155630..155665 of 423185; DR: GTTTTATATTAACTATGAGGAATGTAAAT]	TGGTAAAGTTAACGTTAGGCTTCCGGACGAGTTCGA	JBBB003G_scaffold_5	GTTTTATATTAACTATGAGGAATGTAAAT	0522A0213	39	37	5	0522A0213_Clostridium_perfringens_28_397	Clostridium perfringens	A
JBBB003G_scaffold_5|CRISPR|1|spacer|38of39| id=27794659 [location: 155695..155730 of 423185; DR: GTTTTATATTAACTATGAGGAATGTAAAT]	TCATATGTCGAATTTGATAAATATAATATCTTAGAA	JBBB003G_scaffold_5	GTTTTATATTAACTATGAGGAATGTAAAT	0522A0213	39	38	5	0522A0213_Clostridium_perfringens_28_397	Clostridium perfringens	A
JBBB003G_scaffold_5|CRISPR|1|spacer|39of39| id=27794659 [location: 155760..155796 of 423185; DR: GTTTTATATTAACTATGAGGAATGTAAAT]	TCATCTGATAAAACTCTTAAAATAATATATTGATTAC	JBBB003G_scaffold_5	GTTTTATATTAACTATGAGGAATGTAAAT	0522A0213	39	39	5	0522A0213_Clostridium_perfringens_28_397	Clostridium perfringens	A
0123W_scaffold_1023|CRISPR|1|spacer|1of17| id=27367136 [location: 2286..2318 of 3382; DR: gtgctccccgcgtaagcggggatgagcc]	GTCGCCAGGCGGACAAAGTGGCGGCAGAAACTT	0123W_scaffold_1023	GTGCTCCCCGCGTAAGCGGGGATGAGCC	0123W	17	1	1	0123W_Corynebacterium_59_10	Corynebacterium	W
0123W_scaffold_1023|CRISPR|1|spacer|2of17| id=27367136 [location: 2347..2379 of 3382; DR: gtgctccccgcgtaagcggggatgagcc]	CAGTGTGCCTAGCGCGCCGTAGCCGTCATCCCC	0123W_scaffold_1023	GTGCTCCCCGCGTAAGCGGGGATGAGCC	0123W	17	2	1	0123W_Corynebacterium_59_10	Corynebacterium	W
0123W_scaffold_1023|CRISPR|1|spacer|3of17| id=27367136 [location: 2408..2440 of 3382; DR: gtgctccccgcgtaagcggggatgagcc]	CTCATCGCAGGGAGCTAGGCATGGAGATCATTT	0123W_scaffold_1023	GTGCTCCCCGCGTAAGCGGGGATGAGCC	0123W	17	3	1	0123W_Corynebacterium_59_10	Corynebacterium	W
0123W_scaffold_1023|CRISPR|1|spacer|4of17| id=27367136 [location: 2469..2501 of 3382; DR: gtgctccccgcgtaagcggggatgagcc]	CACCACGTACCCACCACGTGCGGTTGGCTACGT	0123W_scaffold_1023	GTGCTCCCCGCGTAAGCGGGGATGAGCC	0123W	17	4	1	0123W_Corynebacterium_59_10	Corynebacterium	W
0123W_scaffold_1023|CRISPR|1|spacer|5of17| id=27367136 [location: 2530..2562 of 3382; DR: gtgctccccgcgtaagcggggatgagcc]	CTCCTATCTGCTGGCCTGCGCGTACACGGTCAC	0123W_scaffold_1023	GTGCTCCCCGCGTAAGCGGGGATGAGCC	0123W	17	5	1	0123W_Corynebacterium_59_10	Corynebacterium	W
0123W_scaffold_1023|CRISPR|1|spacer|6of17| id=27367136 [location: 2591..2623 of 3382; DR: gtgctccccgcgtaagcggggatgagcc]	GGATTCCCACTCGGGGCCTCGGGTTTCTATCTC	0123W_scaffold_1023	GTGCTCCCCGCGTAAGCGGGGATGAGCC	0123W	17	6	1	0123W_Corynebacterium_59_10	Corynebacterium	W
0123W_scaffold_1023|CRISPR|1|spacer|7of17| id=27367136 [location: 2652..2685 of 3382; DR: gtgctccccgcgtaagcggggatgagcc]	CGCGGTCACTGTGGGCAGTGAGGTGATTATTGGC	0123W_scaffold_1023	GTGCTCCCCGCGTAAGCGGGGATGAGCC	0123W	17	7	1	0123W_Corynebacterium_59_10	Corynebacterium	W
0123W_scaffold_1023|CRISPR|1|spacer|8of17| id=27367136 [location: 2714..2746 of 3382; DR: gtgctccccgcgtaagcggggatgagcc]	GTCCTCAACCTTGCGGGCTAAATCGTCCCGCTG	0123W_scaffold_1023	GTGCTCCCCGCGTAAGCGGGGATGAGCC	0123W	17	8	1	0123W_Corynebacterium_59_10	Corynebacterium	W
0123W_scaffold_1023|CRISPR|1|spacer|9of17| id=27367136 [location: 2775..2806 of 3382; DR: gtgctccccgcgtaagcggggatgagcc]	CCGGAAGCCCCCCGGCTAACCCAACTTCAAAA	0123W_scaffold_1023	GTGCTCCCCGCGTAAGCGGGGATGAGCC	0123W	17	9	1	0123W_Corynebacterium_59_10	Corynebacterium	W
0123W_scaffold_1023|CRISPR|1|spacer|10of17| id=27367136 [location: 2835..2867 of 3382; DR: gtgctccccgcgtaagcggggatgagcc]	CCGGCCCGCAGACATGAACCTCGCCGCCGCAGC	0123W_scaffold_1023	GTGCTCCCCGCGTAAGCGGGGATGAGCC	0123W	17	10	1	0123W_Corynebacterium_59_10	Corynebacterium	W
0123W_scaffold_1023|CRISPR|1|spacer|11of17| id=27367136 [location: 2896..2928 of 3382; DR: gtgctccccgcgtaagcggggatgagcc]	CCTCACTAGCCGAACGCACAATCCGATAAGACC	0123W_scaffold_1023	GTGCTCCCCGCGTAAGCGGGGATGAGCC	0123W	17	11	1	0123W_Corynebacterium_59_10	Corynebacterium	W
0123W_scaffold_1023|CRISPR|1|spacer|12of17| id=27367136 [location: 2957..2989 of 3382; DR: gtgctccccgcgtaagcggggatgagcc]	CGGCTACATCGAACTGCCAGAAAACCACCCCTG	0123W_scaffold_1023	GTGCTCCCCGCGTAAGCGGGGATGAGCC	0123W	17	12	1	0123W_Corynebacterium_59_10	Corynebacterium	W
0123W_scaffold_1023|CRISPR|1|spacer|13of17| id=27367136 [location: 3018..3050 of 3382; DR: gtgctccccgcgtaagcggggatgagcc]	TCGGCCACGCTCACACCTCACTAAATTCAGTTA	0123W_scaffold_1023	GTGCTCCCCGCGTAAGCGGGGATGAGCC	0123W	17	13	1	0123W_Corynebacterium_59_10	Corynebacterium	W
0123W_scaffold_1023|CRISPR|1|spacer|14of17| id=27367136 [location: 3079..3111 of 3382; DR: gtgctccccgcgtaagcggggatgagcc]	CATACCTGTGGGTGCTTGAAGATTCCCTAAAAC	0123W_scaffold_1023	GTGCTCCCCGCGTAAGCGGGGATGAGCC	0123W	17	14	1	0123W_Corynebacterium_59_10	Corynebacterium	W
0123W_scaffold_1023|CRISPR|1|spacer|15of17| id=27367136 [location: 3140..3172 of 3382; DR: gtgctccccgcgtaagcggggatgagcc]	GCATCGCGCCTAGCGCTTCGATTGCGTCCGAAG	0123W_scaffold_1023	GTGCTCCCCGCGTAAGCGGGGATGAGCC	0123W	17	15	1	0123W_Corynebacterium_59_10	Corynebacterium	W
0123W_scaffold_1023|CRISPR|1|spacer|16of17| id=27367136 [location: 3201..3233 of 3382; DR: gtgctccccgcgtaagcggggatgagcc]	CCGGAGCTAGTACCGCAGGAGACGCCAAGACGC	0123W_scaffold_1023	GTGCTCCCCGCGTAAGCGGGGATGAGCC	0123W	17	16	1	0123W_Corynebacterium_59_10	Corynebacterium	W
0123W_scaffold_1023|CRISPR|1|spacer|17of17| id=27367136 [location: 3262..3294 of 3382; DR: gtgctccccgcgtaagcggggatgagcc]	CGAGAAGCGTGCGGCGCGGCGAGATGAGTTGGT	0123W_scaffold_1023	GTGCTCCCCGCGTAAGCGGGGATGAGCC	0123W	17	17	1	0123W_Corynebacterium_59_10	Corynebacterium	W
0123W_scaffold_10|CRISPR|1|spacer|1of39| id=27365123 [location: 20080..20112 of 222435; DR: gttttccccgcgcgagcggggatgttcc]	CGCACATCGAGCGCCTGGTTAGGCCCAAGACGG	0123W_scaffold_10	GTTTTCCCCGCGCGAGCGGGGATGTTCC	0123W	39	1	1	0123W_Corynebacterium_sp__HFH0082_59_121	Corynebacterium sp. HFH0082	W
0123W_scaffold_10|CRISPR|1|spacer|2of39| id=27365123 [location: 20141..20173 of 222435; DR: gttttccccgcgcgagcggggatgttcc]	TGACAATGACCTACGAACTATATGTGGCAGGCA	0123W_scaffold_10	GTTTTCCCCGCGCGAGCGGGGATGTTCC	0123W	39	2	1	0123W_Corynebacterium_sp__HFH0082_59_121	Corynebacterium sp. HFH0082	W
0123W_scaffold_10|CRISPR|1|spacer|3of39| id=27365123 [location: 20202..20234 of 222435; DR: gttttccccgcgcgagcggggatgttcc]	CGAGGACTCCGCATCCGCTGGGAAAACCACGCC	0123W_scaffold_10	GTTTTCCCCGCGCGAGCGGGGATGTTCC	0123W	39	3	1	0123W_Corynebacterium_sp__HFH0082_59_121	Corynebacterium sp. HFH0082	W
0123W_scaffold_10|CRISPR|1|spacer|4of39| id=27365123 [location: 20263..20296 of 222435; DR: gttttccccgcgcgagcggggatgttcc]	AGAAAAAGCCGGACGGCTACCAGTTCCATGATCA	0123W_scaffold_10	GTTTTCCCCGCGCGAGCGGGGATGTTCC	0123W	39	4	1	0123W_Corynebacterium_sp__HFH0082_59_121	Corynebacterium sp. HFH0082	W
0123W_scaffold_10|CRISPR|1|spacer|5of39| id=27365123 [location: 20325..20357 of 222435; DR: gttttccccgcgcgagcggggatgttcc]	TGTCGCCCTGGGCCTTACCGGTGATGTTGGTTG	0123W_scaffold_10	GTTTTCCCCGCGCGAGCGGGGATGTTCC	0123W	39	5	1	0123W_Corynebacterium_sp__HFH0082_59_121	Corynebacterium sp. HFH0082	W
0123W_scaffold_10|CRISPR|1|spacer|6of39| id=27365123 [location: 20386..20418 of 222435; DR: gttttccccgcgcgagcggggatgttcc]	CGGACAATTGGGCGGTGGTGCGGCTGGTGCGGA	0123W_scaffold_10	GTTTTCCCCGCGCGAGCGGGGATGTTCC	0123W	39	6	1	0123W_Corynebacterium_sp__HFH0082_59_121	Corynebacterium sp. HFH0082	W
0123W_scaffold_10|CRISPR|1|spacer|7of39| id=27365123 [location: 20447..20479 of 222435; DR: gttttccccgcgcgagcggggatgttcc]	CCGGCGCTGTCTCCACAGATAACGTCCTCAACC	0123W_scaffold_10	GTTTTCCCCGCGCGAGCGGGGATGTTCC	0123W	39	7	1	0123W_Corynebacterium_sp__HFH0082_59_121	Corynebacterium sp. HFH0082	W
0123W_scaffold_10|CRISPR|1|spacer|8of39| id=27365123 [location: 20508..20540 of 222435; DR: gttttccccgcgcgagcggggatgttcc]	CTGAAGCAACGCCCCACCTACAGCCCCCTAGCC	0123W_scaffold_10	GTTTTCCCCGCGCGAGCGGGGATGTTCC	0123W	39	8	1	0123W_Corynebacterium_sp__HFH0082_59_121	Corynebacterium sp. HFH0082	W
0123W_scaffold_10|CRISPR|1|spacer|9of39| id=27365123 [location: 20569..20601 of 222435; DR: gttttccccgcgcgagcggggatgttcc]	TAACTTGTTTCCGCGCCGTCCGCCCAGCCCTCG	0123W_scaffold_10	GTTTTCCCCGCGCGAGCGGGGATGTTCC	0123W	39	9	1	0123W_Corynebacterium_sp__HFH0082_59_121	Corynebacterium sp. HFH0082	W
0123W_scaffold_10|CRISPR|1|spacer|10of39| id=27365123 [location: 20630..20662 of 222435; DR: gttttccccgcgcgagcggggatgttcc]	GAACCGTCTTGATCTGCTTAGCACGCTGTTGGA	0123W_scaffold_10	GTTTTCCCCGCGCGAGCGGGGATGTTCC	0123W	39	10	1	0123W_Corynebacterium_sp__HFH0082_59_121	Corynebacterium sp. HFH0082	W
0123W_scaffold_10|CRISPR|1|spacer|11of39| id=27365123 [location: 20691..20723 of 222435; DR: gttttccccgcgcgagcggggatgttcc]	TTGCATTGTGCTTATGGCAATGGCGTTTCTTCA	0123W_scaffold_10	GTTTTCCCCGCGCGAGCGGGGATGTTCC	0123W	39	11	1	0123W_Corynebacterium_sp__HFH0082_59_121	Corynebacterium sp. HFH0082	W
0123W_scaffold_10|CRISPR|1|spacer|12of39| id=27365123 [location: 20752..20784 of 222435; DR: gttttccccgcgcgagcggggatgttcc]	GGAACACGCCGGTGCGGACGGTGGTTTCATACG	0123W_scaffold_10	GTTTTCCCCGCGCGAGCGGGGATGTTCC	0123W	39	12	1	0123W_Corynebacterium_sp__HFH0082_59_121	Corynebacterium sp. HFH0082	W
0123W_scaffold_10|CRISPR|1|spacer|13of39| id=27365123 [location: 20813..20845 of 222435; DR: gttttccccgcgcgagcggggatgttcc]	CTTCACCCTGGACGGGGAACCGCCGGACTCGAC	0123W_scaffold_10	GTTTTCCCCGCGCGAGCGGGGATGTTCC	0123W	39	13	1	0123W_Corynebacterium_sp__HFH0082_59_121	Corynebacterium sp. HFH0082	W
0123W_scaffold_10|CRISPR|1|spacer|14of39| id=27365123 [location: 20874..20906 of 222435; DR: gttttccccgcgcgagcggggatgttcc]	CAGCCGTGTCGATGACCGAACCCAGACCAGGCT	0123W_scaffold_10	GTTTTCCCCGCGCGAGCGGGGATGTTCC	0123W	39	14	1	0123W_Corynebacterium_sp__HFH0082_59_121	Corynebacterium sp. HFH0082	W
0123W_scaffold_10|CRISPR|1|spacer|15of39| id=27365123 [location: 20935..20967 of 222435; DR: gttttccccgcgcgagcggggatgttcc]	CGACAACAGCACATCCGAGTAGATGGGGTTAAC	0123W_scaffold_10	GTTTTCCCCGCGCGAGCGGGGATGTTCC	0123W	39	15	1	0123W_Corynebacterium_sp__HFH0082_59_121	Corynebacterium sp. HFH0082	W
0123W_scaffold_10|CRISPR|1|spacer|16of39| id=27365123 [location: 20996..21028 of 222435; DR: gttttccccgcgcgagcggggatgttcc]	TAACAGCGGCGTGATGCCTTTCACGAACCAAAT	0123W_scaffold_10	GTTTTCCCCGCGCGAGCGGGGATGTTCC	0123W	39	16	1	0123W_Corynebacterium_sp__HFH0082_59_121	Corynebacterium sp. HFH0082	W
0123W_scaffold_10|CRISPR|1|spacer|17of39| id=27365123 [location: 21057..21089 of 222435; DR: gttttccccgcgcgagcggggatgttcc]	CATGATTTCAGCGCGTTGAACATTCATCAGGCG	0123W_scaffold_10	GTTTTCCCCGCGCGAGCGGGGATGTTCC	0123W	39	17	1	0123W_Corynebacterium_sp__HFH0082_59_121	Corynebacterium sp. HFH0082	W
0123W_scaffold_10|CRISPR|1|spacer|18of39| id=27365123 [location: 21118..21150 of 222435; DR: gttttccccgcgcgagcggggatgttcc]	CCAGCGACAAGAAAGAGACTATCAGTGGCCAGC	0123W_scaffold_10	GTTTTCCCCGCGCGAGCGGGGATGTTCC	0123W	39	18	1	0123W_Corynebacterium_sp__HFH0082_59_121	Corynebacterium sp. HFH0082	W
0123W_scaffold_10|CRISPR|1|spacer|19of39| id=27365123 [location: 21179..21211 of 222435; DR: gttttccccgcgcgagcggggatgttcc]	GCCGTTAGTGACCAAGTAATCCTCCGAAACCCC	0123W_scaffold_10	GTTTTCCCCGCGCGAGCGGGGATGTTCC	0123W	39	19	1	0123W_Corynebacterium_sp__HFH0082_59_121	Corynebacterium sp. HFH0082	W
0123W_scaffold_10|CRISPR|1|spacer|20of39| id=27365123 [location: 21240..21272 of 222435; DR: gttttccccgcgcgagcggggatgttcc]	CACGACGAATAGGAGAACACATGGACATTCTGA	0123W_scaffold_10	GTTTTCCCCGCGCGAGCGGGGATGTTCC	0123W	39	20	1	0123W_Corynebacterium_sp__HFH0082_59_121	Corynebacterium sp. HFH0082	W
0123W_scaffold_10|CRISPR|1|spacer|21of39| id=27365123 [location: 21301..21333 of 222435; DR: gttttccccgcgcgagcggggatgttcc]	TCGTCGCTTCCCACTGATGCGGTTGATCAACAG	0123W_scaffold_10	GTTTTCCCCGCGCGAGCGGGGATGTTCC	0123W	39	21	1	0123W_Corynebacterium_sp__HFH0082_59_121	Corynebacterium sp. HFH0082	W
0123W_scaffold_10|CRISPR|1|spacer|22of39| id=27365123 [location: 21362..21394 of 222435; DR: gttttccccgcgcgagcggggatgttcc]	CAACAGTGTCGTTGACCATCTGGTTCGGCAGGA	0123W_scaffold_10	GTTTTCCCCGCGCGAGCGGGGATGTTCC	0123W	39	22	1	0123W_Corynebacterium_sp__HFH0082_59_121	Corynebacterium sp. HFH0082	W
0123W_scaffold_10|CRISPR|1|spacer|23of39| id=27365123 [location: 21423..21455 of 222435; DR: gttttccccgcgcgagcggggatgttcc]	TCTCTGCAAACCGGGATACTGTGCCTAGTTCGT	0123W_scaffold_10	GTTTTCCCCGCGCGAGCGGGGATGTTCC	0123W	39	23	1	0123W_Corynebacterium_sp__HFH0082_59_121	Corynebacterium sp. HFH0082	W
0123W_scaffold_10|CRISPR|1|spacer|24of39| id=27365123 [location: 21484..21516 of 222435; DR: gttttccccgcgcgagcggggatgttcc]	GTACACCGGCGCGCTGGCGGAGATGCTCTTCAA	0123W_scaffold_10	GTTTTCCCCGCGCGAGCGGGGATGTTCC	0123W	39	24	1	0123W_Corynebacterium_sp__HFH0082_59_121	Corynebacterium sp. HFH0082	W
0123W_scaffold_10|CRISPR|1|spacer|25of39| id=27365123 [location: 21545..21577 of 222435; DR: gttttccccgcgcgagcggggatgttcc]	CCAAGTCGCCACGCAAAACGGCGAACAAACCCT	0123W_scaffold_10	GTTTTCCCCGCGCGAGCGGGGATGTTCC	0123W	39	25	1	0123W_Corynebacterium_sp__HFH0082_59_121	Corynebacterium sp. HFH0082	W
0123W_scaffold_10|CRISPR|1|spacer|26of39| id=27365123 [location: 21606..21638 of 222435; DR: gttttccccgcgcgagcggggatgttcc]	CGTCGATAGATTCTCTAAAAGTCGTAGACCCTA	0123W_scaffold_10	GTTTTCCCCGCGCGAGCGGGGATGTTCC	0123W	39	26	1	0123W_Corynebacterium_sp__HFH0082_59_121	Corynebacterium sp. HFH0082	W
0123W_scaffold_10|CRISPR|1|spacer|27of39| id=27365123 [location: 21667..21699 of 222435; DR: gttttccccgcgcgagcggggatgttcc]	CCCGCCCCGCCCCTGCGTATTTAAATTAGATTT	0123W_scaffold_10	GTTTTCCCCGCGCGAGCGGGGATGTTCC	0123W	39	27	1	0123W_Corynebacterium_sp__HFH0082_59_121	Corynebacterium sp. HFH0082	W
0123W_scaffold_10|CRISPR|1|spacer|28of39| id=27365123 [location: 21728..21760 of 222435; DR: gttttccccgcgcgagcggggatgttcc]	CTCCTGCACAACCGAACCGGCAGCACCGGAGAT	0123W_scaffold_10	GTTTTCCCCGCGCGAGCGGGGATGTTCC	0123W	39	28	1	0123W_Corynebacterium_sp__HFH0082_59_121	Corynebacterium sp. HFH0082	W
0123W_scaffold_10|CRISPR|1|spacer|29of39| id=27365123 [location: 21789..21821 of 222435; DR: gttttccccgcgcgagcggggatgttcc]	CGGCTTCACCGTGCAGCGGCTGACTCCATCGAT	0123W_scaffold_10	GTTTTCCCCGCGCGAGCGGGGATGTTCC	0123W	39	29	1	0123W_Corynebacterium_sp__HFH0082_59_121	Corynebacterium sp. HFH0082	W
0123W_scaffold_10|CRISPR|1|spacer|30of39| id=27365123 [location: 21850..21882 of 222435; DR: gttttccccgcgcgagcggggatgttcc]	GTGCAGACGGGAACCTAGACTTTTGTTGCGATT	0123W_scaffold_10	GTTTTCCCCGCGCGAGCGGGGATGTTCC	0123W	39	30	1	0123W_Corynebacterium_sp__HFH0082_59_121	Corynebacterium sp. HFH0082	W
0123W_scaffold_10|CRISPR|1|spacer|31of39| id=27365123 [location: 21911..21943 of 222435; DR: gttttccccgcgcgagcggggatgttcc]	GAAGATACGTTTATTGTTGCGGAGTCGCAGGCG	0123W_scaffold_10	GTTTTCCCCGCGCGAGCGGGGATGTTCC	0123W	39	31	1	0123W_Corynebacterium_sp__HFH0082_59_121	Corynebacterium sp. HFH0082	W
0123W_scaffold_10|CRISPR|1|spacer|32of39| id=27365123 [location: 21972..22004 of 222435; DR: gttttccccgcgcgagcggggatgttcc]	CAACGCACCCCACACCGACAACGGGGCGGCAGA	0123W_scaffold_10	GTTTTCCCCGCGCGAGCGGGGATGTTCC	0123W	39	32	1	0123W_Corynebacterium_sp__HFH0082_59_121	Corynebacterium sp. HFH0082	W
0123W_scaffold_10|CRISPR|1|spacer|33of39| id=27365123 [location: 22033..22065 of 222435; DR: gttttccccgcgcgagcggggatgttcc]	CGGCTGCTGTATGAGCGCGGCTGGGCAGACCCA	0123W_scaffold_10	GTTTTCCCCGCGCGAGCGGGGATGTTCC	0123W	39	33	1	0123W_Corynebacterium_sp__HFH0082_59_121	Corynebacterium sp. HFH0082	W
0123W_scaffold_10|CRISPR|1|spacer|34of39| id=27365123 [location: 22094..22126 of 222435; DR: gttttccccgcgcgagcggggatgttcc]	CCAAATCGGAACATCCCCAATGACCTAGGGGAA	0123W_scaffold_10	GTTTTCCCCGCGCGAGCGGGGATGTTCC	0123W	39	34	1	0123W_Corynebacterium_sp__HFH0082_59_121	Corynebacterium sp. HFH0082	W
0123W_scaffold_10|CRISPR|1|spacer|35of39| id=27365123 [location: 22155..22187 of 222435; DR: gttttccccgcgcgagcggggatgttcc]	GGGTACGGTGACCCAACCGGAAAATCACCGGGT	0123W_scaffold_10	GTTTTCCCCGCGCGAGCGGGGATGTTCC	0123W	39	35	1	0123W_Corynebacterium_sp__HFH0082_59_121	Corynebacterium sp. HFH0082	W
0123W_scaffold_10|CRISPR|1|spacer|36of39| id=27365123 [location: 22216..22248 of 222435; DR: gttttccccgcgcgagcggggatgttcc]	GGGCAATATCGTTCCCTTCGTTACCAACAGCCC	0123W_scaffold_10	GTTTTCCCCGCGCGAGCGGGGATGTTCC	0123W	39	36	1	0123W_Corynebacterium_sp__HFH0082_59_121	Corynebacterium sp. HFH0082	W
0123W_scaffold_10|CRISPR|1|spacer|37of39| id=27365123 [location: 22277..22310 of 222435; DR: gttttccccgcgcgagcggggatgttcc]	CCAACCAGCAACTACGTAGGCGACCAAGACACCG	0123W_scaffold_10	GTTTTCCCCGCGCGAGCGGGGATGTTCC	0123W	39	37	1	0123W_Corynebacterium_sp__HFH0082_59_121	Corynebacterium sp. HFH0082	W
0123W_scaffold_10|CRISPR|1|spacer|38of39| id=27365123 [location: 22339..22371 of 222435; DR: gttttccccgcgcgagcggggatgttcc]	CACTCCCGCGTCCGCATACATGATGTAGTCAGC	0123W_scaffold_10	GTTTTCCCCGCGCGAGCGGGGATGTTCC	0123W	39	38	1	0123W_Corynebacterium_sp__HFH0082_59_121	Corynebacterium sp. HFH0082	W
0123W_scaffold_10|CRISPR|1|spacer|39of39| id=27365123 [location: 22400..22432 of 222435; DR: gttttccccgcgcgagcggggatgttcc]	CTTCGAGATGGGTGGCGCGCGCGGCAACGGGCA	0123W_scaffold_10	GTTTTCCCCGCGCGAGCGGGGATGTTCC	0123W	39	39	1	0123W_Corynebacterium_sp__HFH0082_59_121	Corynebacterium sp. HFH0082	W
0123W_scaffold_10|CRISPR|2|spacer|1of22| id=27365123 [location: 22565..22597 of 222435; DR: gttttccccgcgcgagcggggatgttcc]	CACCAGGGAACCGCGCTCAGTGATCTGCGCATC	0123W_scaffold_10	GTTTTCCCCGCGCGAGCGGGGATGTTCC	0123W	22	1	1	0123W_Corynebacterium_sp__HFH0082_59_121	Corynebacterium sp. HFH0082	W
0123W_scaffold_10|CRISPR|2|spacer|2of22| id=27365123 [location: 22626..22658 of 222435; DR: gttttccccgcgcgagcggggatgttcc]	CGAATGCCGCCACGACACTGCCCGCGTAGCCGG	0123W_scaffold_10	GTTTTCCCCGCGCGAGCGGGGATGTTCC	0123W	22	2	1	0123W_Corynebacterium_sp__HFH0082_59_121	Corynebacterium sp. HFH0082	W
0123W_scaffold_10|CRISPR|2|spacer|3of22| id=27365123 [location: 22687..22719 of 222435; DR: gttttccccgcgcgagcggggatgttcc]	TGGCTACACCTGTTGAAGTTGTCGGAACGGTCA	0123W_scaffold_10	GTTTTCCCCGCGCGAGCGGGGATGTTCC	0123W	22	3	1	0123W_Corynebacterium_sp__HFH0082_59_121	Corynebacterium sp. HFH0082	W
0123W_scaffold_10|CRISPR|2|spacer|4of22| id=27365123 [location: 22748..22780 of 222435; DR: gttttccccgcgcgagcggggatgttcc]	GCGGCGGCGGCGCGTGTCAAGGCAAAAGAAGCG	0123W_scaffold_10	GTTTTCCCCGCGCGAGCGGGGATGTTCC	0123W	22	4	1	0123W_Corynebacterium_sp__HFH0082_59_121	Corynebacterium sp. HFH0082	W
0123W_scaffold_10|CRISPR|2|spacer|5of22| id=27365123 [location: 22809..22841 of 222435; DR: gttttccccgcgcgagcggggatgttcc]	CACCTTGCCGGGTGCGGTGGATAAGGCGATGGA	0123W_scaffold_10	GTTTTCCCCGCGCGAGCGGGGATGTTCC	0123W	22	5	1	0123W_Corynebacterium_sp__HFH0082_59_121	Corynebacterium sp. HFH0082	W
0123W_scaffold_10|CRISPR|2|spacer|6of22| id=27365123 [location: 22870..22902 of 222435; DR: gttttccccgcgcgagcggggatgttcc]	TCAGAACCCCTTCGTTAGGTTTGGCTTTTCCTT	0123W_scaffold_10	GTTTTCCCCGCGCGAGCGGGGATGTTCC	0123W	22	6	1	0123W_Corynebacterium_sp__HFH0082_59_121	Corynebacterium sp. HFH0082	W
0123W_scaffold_10|CRISPR|2|spacer|7of22| id=27365123 [location: 22931..22963 of 222435; DR: gttttccccgcgcgagcggggatgttcc]	TCATGGGACGCACCAACATCTAAAAACCGGCGA	0123W_scaffold_10	GTTTTCCCCGCGCGAGCGGGGATGTTCC	0123W	22	7	1	0123W_Corynebacterium_sp__HFH0082_59_121	Corynebacterium sp. HFH0082	W
0123W_scaffold_10|CRISPR|2|spacer|8of22| id=27365123 [location: 22992..23024 of 222435; DR: gttttccccgcgcgagcggggatgttcc]	GCCCGTCTGGGCTGCAGGAGTTGGCGTCGTATG	0123W_scaffold_10	GTTTTCCCCGCGCGAGCGGGGATGTTCC	0123W	22	8	1	0123W_Corynebacterium_sp__HFH0082_59_121	Corynebacterium sp. HFH0082	W
0123W_scaffold_10|CRISPR|2|spacer|9of22| id=27365123 [location: 23053..23085 of 222435; DR: gttttccccgcgcgagcggggatgttcc]	GCCCGTCTGGGCTGCAGGAGTTGGCGTCGTATG	0123W_scaffold_10	GTTTTCCCCGCGCGAGCGGGGATGTTCC	0123W	22	9	1	0123W_Corynebacterium_sp__HFH0082_59_121	Corynebacterium sp. HFH0082	W
0123W_scaffold_10|CRISPR|2|spacer|10of22| id=27365123 [location: 23114..23146 of 222435; DR: gttttccccgcgcgagcggggatgttcc]	GTACCCAATCCCGCCAGGAACCCCGGACACCAG	0123W_scaffold_10	GTTTTCCCCGCGCGAGCGGGGATGTTCC	0123W	22	10	1	0123W_Corynebacterium_sp__HFH0082_59_121	Corynebacterium sp. HFH0082	W
0123W_scaffold_10|CRISPR|2|spacer|11of22| id=27365123 [location: 23175..23207 of 222435; DR: gttttccccgcgcgagcggggatgttcc]	GCTGTCGAGCGGCAACGACGCGCCAGGAATGGC	0123W_scaffold_10	GTTTTCCCCGCGCGAGCGGGGATGTTCC	0123W	22	11	1	0123W_Corynebacterium_sp__HFH0082_59_121	Corynebacterium sp. HFH0082	W
0123W_scaffold_10|CRISPR|2|spacer|12of22| id=27365123 [location: 23236..23268 of 222435; DR: gttttccccgcgcgagcggggatgttcc]	CGACAGCAGCACGTCCGAGTAGATGGGTTTAAC	0123W_scaffold_10	GTTTTCCCCGCGCGAGCGGGGATGTTCC	0123W	22	12	1	0123W_Corynebacterium_sp__HFH0082_59_121	Corynebacterium sp. HFH0082	W
0123W_scaffold_10|CRISPR|2|spacer|13of22| id=27365123 [location: 23297..23329 of 222435; DR: gttttccccgcgcgagcggggatgttcc]	CAGCGCTGATTGACACTGACCCGGTGCAGGAGA	0123W_scaffold_10	GTTTTCCCCGCGCGAGCGGGGATGTTCC	0123W	22	13	1	0123W_Corynebacterium_sp__HFH0082_59_121	Corynebacterium sp. HFH0082	W
0123W_scaffold_10|CRISPR|2|spacer|14of22| id=27365123 [location: 23358..23390 of 222435; DR: gttttccccgcgcgagcggggatgttcc]	TGAGATACGGGGAACCATCAGCGATAGTGATTT	0123W_scaffold_10	GTTTTCCCCGCGCGAGCGGGGATGTTCC	0123W	22	14	1	0123W_Corynebacterium_sp__HFH0082_59_121	Corynebacterium sp. HFH0082	W
0123W_scaffold_10|CRISPR|2|spacer|15of22| id=27365123 [location: 23419..23451 of 222435; DR: gttttccccgcgcgagcggggatgttcc]	CGGGCCAATAAACGGCTCAATAACCGCGGCACC	0123W_scaffold_10	GTTTTCCCCGCGCGAGCGGGGATGTTCC	0123W	22	15	1	0123W_Corynebacterium_sp__HFH0082_59_121	Corynebacterium sp. HFH0082	W
0123W_scaffold_10|CRISPR|2|spacer|16of22| id=27365123 [location: 23480..23512 of 222435; DR: gttttccccgcgcgagcggggatgttcc]	CACACCGGACAGAATCACCGTGCGGTTGGAGTA	0123W_scaffold_10	GTTTTCCCCGCGCGAGCGGGGATGTTCC	0123W	22	16	1	0123W_Corynebacterium_sp__HFH0082_59_121	Corynebacterium sp. HFH0082	W
0123W_scaffold_10|CRISPR|2|spacer|17of22| id=27365123 [location: 23541..23573 of 222435; DR: gttttccccgcgcgagcggggatgttcc]	TCACCAATTGCGACATGTGCGACCCGAACGGCT	0123W_scaffold_10	GTTTTCCCCGCGCGAGCGGGGATGTTCC	0123W	22	17	1	0123W_Corynebacterium_sp__HFH0082_59_121	Corynebacterium sp. HFH0082	W
0123W_scaffold_10|CRISPR|2|spacer|18of22| id=27365123 [location: 23602..23634 of 222435; DR: gttttccccgcgcgagcggggatgttcc]	CCGCTACCGGGCTAACCCCAAGCGAACATGAAG	0123W_scaffold_10	GTTTTCCCCGCGCGAGCGGGGATGTTCC	0123W	22	18	1	0123W_Corynebacterium_sp__HFH0082_59_121	Corynebacterium sp. HFH0082	W
0123W_scaffold_10|CRISPR|2|spacer|19of22| id=27365123 [location: 23663..23695 of 222435; DR: gttttccccgcgcgagcggggatgttcc]	CACGTACGTGTCCCCAACCTGCTGTGTGCCGTA	0123W_scaffold_10	GTTTTCCCCGCGCGAGCGGGGATGTTCC	0123W	22	19	1	0123W_Corynebacterium_sp__HFH0082_59_121	Corynebacterium sp. HFH0082	W
0123W_scaffold_10|CRISPR|2|spacer|20of22| id=27365123 [location: 23724..23756 of 222435; DR: gttttccccgcgcgagcggggatgttcc]	ACTGCTTAGATCGCCCTGTACTTCATCGGCCGC	0123W_scaffold_10	GTTTTCCCCGCGCGAGCGGGGATGTTCC	0123W	22	20	1	0123W_Corynebacterium_sp__HFH0082_59_121	Corynebacterium sp. HFH0082	W
0123W_scaffold_10|CRISPR|2|spacer|21of22| id=27365123 [location: 23785..23817 of 222435; DR: gttttccccgcgcgagcggggatgttcc]	TCAAGGAATTGCTAGCCGACATGGCAAGGATTG	0123W_scaffold_10	GTTTTCCCCGCGCGAGCGGGGATGTTCC	0123W	22	21	1	0123W_Corynebacterium_sp__HFH0082_59_121	Corynebacterium sp. HFH0082	W
0123W_scaffold_10|CRISPR|2|spacer|22of22| id=27365123 [location: 23846..23878 of 222435; DR: gttttccccgcgcgagcggggatgttcc]	GAAACGCTCACCCCACTCGGGAACGTCCGGGGC	0123W_scaffold_10	GTTTTCCCCGCGCGAGCGGGGATGTTCC	0123W	22	22	1	0123W_Corynebacterium_sp__HFH0082_59_121	Corynebacterium sp. HFH0082	W
0123W_scaffold_59|CRISPR|1|spacer|1of5| id=27365172 [location: 54140..54195 of 61962; DR: aaaagagaaagaaataaaagctaaagataaaact]	TCTAAAGAAGTGAAAAAGGCTGATAAGGCAATTGATGATCATAATGCTAAAAAACC	0123W_scaffold_59	AAAAGAGAAAGAAATAAAAGCTAAAGATAAAACT	0123W	5	1	1	0123W_Staphylococcus_epidermidis_32_35	Staphylococcus epidermidis	W
0123W_scaffold_59|CRISPR|1|spacer|2of5| id=27365172 [location: 54230..54285 of 61962; DR: aaaagagaaagaaataaaagctaaagataaaact]	ACAAAGGAAGTAAAGAAAGCCGATAAATCATTAGACGATCACAATAAAAAGAAAGC	0123W_scaffold_59	AAAAGAGAAAGAAATAAAAGCTAAAGATAAAACT	0123W	5	2	1	0123W_Staphylococcus_epidermidis_32_35	Staphylococcus epidermidis	W
0123W_scaffold_59|CRISPR|1|spacer|3of5| id=27365172 [location: 54320..54375 of 61962; DR: aaaagagaaagaaataaaagctaaagataaaact]	TCTGATTTAACTAAAAAAGTAAAATCATCATTAAAGGAAATTGATGATTTAAAAGT	0123W_scaffold_59	AAAAGAGAAAGAAATAAAAGCTAAAGATAAAACT	0123W	5	3	1	0123W_Staphylococcus_epidermidis_32_35	Staphylococcus epidermidis	W
0123W_scaffold_59|CRISPR|1|spacer|4of5| id=27365172 [location: 54410..54465 of 61962; DR: aaaagagaaagaaataaaagctaaagataaaact]	TCTAAAGCTACTAAAAAAGCCGAAAATGCTATGAAGAAATACAAAGAAGTTAAAGC	0123W_scaffold_59	AAAAGAGAAAGAAATAAAAGCTAAAGATAAAACT	0123W	5	4	1	0123W_Staphylococcus_epidermidis_32_35	Staphylococcus epidermidis	W
0123W_scaffold_59|CRISPR|1|spacer|5of5| id=27365172 [location: 54500..54555 of 61962; DR: aaaagagaaagaaataaaagctaaagataaaact]	TCTGAAAAGGCGTTTAAGGCCAAAATTAAAGTTTTGGAATATAACAATGCTAAAGC	0123W_scaffold_59	AAAAGAGAAAGAAATAAAAGCTAAAGATAAAACT	0123W	5	5	1	0123W_Staphylococcus_epidermidis_32_35	Staphylococcus epidermidis	W
0123W_scaffold_28|CRISPR|1|spacer|1of11| id=27365141 [location: 129638..129667 of 153020; DR: gttttggaaccattcgaaacaacacagctctaaaac]	AGGAAGCCTTCCATGATAGCTTGGCCAGCA	0123W_scaffold_28	GTTTTGGAACCATTCGAAACAACACAGCTCTAAAAC	0123W	11	1	1	0123W_Streptococcus_mitis_40_11	Streptococcus mitis	W
0123W_scaffold_28|CRISPR|1|spacer|2of11| id=27365141 [location: 129704..129733 of 153020; DR: gttttggaaccattcgaaacaacacagctctaaaac]	ATGTTGCTGGCACTCATACCCCTCTGCGTA	0123W_scaffold_28	GTTTTGGAACCATTCGAAACAACACAGCTCTAAAAC	0123W	11	2	1	0123W_Streptococcus_mitis_40_11	Streptococcus mitis	W
0123W_scaffold_28|CRISPR|1|spacer|3of11| id=27365141 [location: 129770..129799 of 153020; DR: gttttggaaccattcgaaacaacacagctctaaaac]	TTTCGCCGTTGTCCTTGAGGTAGTACCATT	0123W_scaffold_28	GTTTTGGAACCATTCGAAACAACACAGCTCTAAAAC	0123W	11	3	1	0123W_Streptococcus_mitis_40_11	Streptococcus mitis	W
0123W_scaffold_28|CRISPR|1|spacer|4of11| id=27365141 [location: 129836..129865 of 153020; DR: gttttggaaccattcgaaacaacacagctctaaaac]	CCACTTTATGGAATTTCCGTGCAAAGAATA	0123W_scaffold_28	GTTTTGGAACCATTCGAAACAACACAGCTCTAAAAC	0123W	11	4	1	0123W_Streptococcus_mitis_40_11	Streptococcus mitis	W
0123W_scaffold_28|CRISPR|1|spacer|5of11| id=27365141 [location: 129902..129931 of 153020; DR: gttttggaaccattcgaaacaacacagctctaaaac]	CCTTTCCACCCAGTACGAAGAATACCGACC	0123W_scaffold_28	GTTTTGGAACCATTCGAAACAACACAGCTCTAAAAC	0123W	11	5	1	0123W_Streptococcus_mitis_40_11	Streptococcus mitis	W
0123W_scaffold_28|CRISPR|1|spacer|6of11| id=27365141 [location: 129968..129997 of 153020; DR: gttttggaaccattcgaaacaacacagctctaaaac]	ATTTGATAAGTTGCATCAATTCAGCTCTAG	0123W_scaffold_28	GTTTTGGAACCATTCGAAACAACACAGCTCTAAAAC	0123W	11	6	1	0123W_Streptococcus_mitis_40_11	Streptococcus mitis	W
0123W_scaffold_28|CRISPR|1|spacer|7of11| id=27365141 [location: 130034..130064 of 153020; DR: gttttggaaccattcgaaacaacacagctctaaaac]	AAAGTTGTATAACCTATTGGTTTATCTTTCC	0123W_scaffold_28	GTTTTGGAACCATTCGAAACAACACAGCTCTAAAAC	0123W	11	7	1	0123W_Streptococcus_mitis_40_11	Streptococcus mitis	W
0123W_scaffold_28|CRISPR|1|spacer|8of11| id=27365141 [location: 130101..130130 of 153020; DR: gttttggaaccattcgaaacaacacagctctaaaac]	TTTGGATAGCTGACGCTGATATTTAAGGCG	0123W_scaffold_28	GTTTTGGAACCATTCGAAACAACACAGCTCTAAAAC	0123W	11	8	1	0123W_Streptococcus_mitis_40_11	Streptococcus mitis	W
0123W_scaffold_28|CRISPR|1|spacer|9of11| id=27365141 [location: 130167..130196 of 153020; DR: gttttggaaccattcgaaacaacacagctctaaaac]	AATGTCTTATGTATAGGTACAATACCAATA	0123W_scaffold_28	GTTTTGGAACCATTCGAAACAACACAGCTCTAAAAC	0123W	11	9	1	0123W_Streptococcus_mitis_40_11	Streptococcus mitis	W
0123W_scaffold_28|CRISPR|1|spacer|10of11| id=27365141 [location: 130233..130262 of 153020; DR: gttttggaaccattcgaaacaacacagctctaaaac]	AGTCTGTAATATACACTAATTGCAAAGCAG	0123W_scaffold_28	GTTTTGGAACCATTCGAAACAACACAGCTCTAAAAC	0123W	11	10	1	0123W_Streptococcus_mitis_40_11	Streptococcus mitis	W
0123W_scaffold_28|CRISPR|1|spacer|11of11| id=27365141 [location: 130299..130328 of 153020; DR: gttttggaaccattcgaaacaacacagctctaaaac]	ATTAGCTATCGGGGGTTAAATCAAAATTTT	0123W_scaffold_28	GTTTTGGAACCATTCGAAACAACACAGCTCTAAAAC	0123W	11	11	1	0123W_Streptococcus_mitis_40_11	Streptococcus mitis	W
0123Y_scaffold_2|CRISPR|1|spacer|1of9| id=27372761 [location: 154211..154240 of 471741; DR: gttgtagctccctttttcatttcgcagtgctataat]	ACAACGCATCACAGCTGAATGTGACATGCC	0123Y_scaffold_2	GTTGTAGCTCCCTTTTTCATTTCGCAGTGCTATAAT	0123Y	9	1	1	0123Y_Haemophilus_parainfluenzae_40_43	Haemophilus parainfluenzae	Y
0123Y_scaffold_2|CRISPR|1|spacer|2of9| id=27372761 [location: 154277..154306 of 471741; DR: gttgtagctccctttttcatttcgcagtgctataat]	CACCAGTCGCACTTAACAAGCGGTCGATTA	0123Y_scaffold_2	GTTGTAGCTCCCTTTTTCATTTCGCAGTGCTATAAT	0123Y	9	2	1	0123Y_Haemophilus_parainfluenzae_40_43	Haemophilus parainfluenzae	Y
0123Y_scaffold_2|CRISPR|1|spacer|3of9| id=27372761 [location: 154343..154372 of 471741; DR: gttgtagctccctttttcatttcgcagtgctataat]	CATCGCCACTGATTGAATAGGCTTTGTATT	0123Y_scaffold_2	GTTGTAGCTCCCTTTTTCATTTCGCAGTGCTATAAT	0123Y	9	3	1	0123Y_Haemophilus_parainfluenzae_40_43	Haemophilus parainfluenzae	Y
0123Y_scaffold_2|CRISPR|1|spacer|4of9| id=27372761 [location: 154409..154438 of 471741; DR: gttgtagctccctttttcatttcgcagtgctataat]	TAACACTGCTGTTATTAGCGTGAACACAAA	0123Y_scaffold_2	GTTGTAGCTCCCTTTTTCATTTCGCAGTGCTATAAT	0123Y	9	4	1	0123Y_Haemophilus_parainfluenzae_40_43	Haemophilus parainfluenzae	Y
0123Y_scaffold_2|CRISPR|1|spacer|5of9| id=27372761 [location: 154475..154504 of 471741; DR: gttgtagctccctttttcatttcgcagtgctataat]	ATGAACATGGTATTTTCATAGTCAGCACTA	0123Y_scaffold_2	GTTGTAGCTCCCTTTTTCATTTCGCAGTGCTATAAT	0123Y	9	5	1	0123Y_Haemophilus_parainfluenzae_40_43	Haemophilus parainfluenzae	Y
0123Y_scaffold_2|CRISPR|1|spacer|6of9| id=27372761 [location: 154541..154570 of 471741; DR: gttgtagctccctttttcatttcgcagtgctataat]	TTCTTTCTTCTCTTTGTAAAAAGGCATAAA	0123Y_scaffold_2	GTTGTAGCTCCCTTTTTCATTTCGCAGTGCTATAAT	0123Y	9	6	1	0123Y_Haemophilus_parainfluenzae_40_43	Haemophilus parainfluenzae	Y
0123Y_scaffold_2|CRISPR|1|spacer|7of9| id=27372761 [location: 154607..154636 of 471741; DR: gttgtagctccctttttcatttcgcagtgctataat]	TTTTTTGCGTAGCGTTACCGACTTTAGTTG	0123Y_scaffold_2	GTTGTAGCTCCCTTTTTCATTTCGCAGTGCTATAAT	0123Y	9	7	1	0123Y_Haemophilus_parainfluenzae_40_43	Haemophilus parainfluenzae	Y
0123Y_scaffold_2|CRISPR|1|spacer|8of9| id=27372761 [location: 154673..154702 of 471741; DR: gttgtagctccctttttcatttcgcagtgctataat]	GCAGTTAAGGGGTTATCTACAATAGGTGGA	0123Y_scaffold_2	GTTGTAGCTCCCTTTTTCATTTCGCAGTGCTATAAT	0123Y	9	8	1	0123Y_Haemophilus_parainfluenzae_40_43	Haemophilus parainfluenzae	Y
0123Y_scaffold_2|CRISPR|1|spacer|9of9| id=27372761 [location: 154739..154768 of 471741; DR: gttgtagctccctttttcatttcgcagtgctataat]	TATGGCGGTGAACACAGCGAAGAAAGGTGT	0123Y_scaffold_2	GTTGTAGCTCCCTTTTTCATTTCGCAGTGCTATAAT	0123Y	9	9	1	0123Y_Haemophilus_parainfluenzae_40_43	Haemophilus parainfluenzae	Y
qb307082014_D_scaffold_23|CRISPR|1|spacer|1of8| id=7296450 [location: 32241..32270 of 127710; DR: gttttactgataagaaattattgagagtacaaaaac]	TATTGGGCAACGATTCTTTCTTTAATCCCT	qb307082014_D_scaffold_23	GTTTTACTGATAAGAAATTATTGAGAGTACAAAAAC	0113A1018	8	1	1	0113A1018_Enterococcus_faecalis_36_17	Enterococcus faecalis	A
qb307082014_D_scaffold_23|CRISPR|1|spacer|2of8| id=7296450 [location: 32307..32336 of 127710; DR: gttttactgataagaaattattgagagtacaaaaac]	AAAATTCTGCGATGAAGTGAATCAACATGT	qb307082014_D_scaffold_23	GTTTTACTGATAAGAAATTATTGAGAGTACAAAAAC	0113A1018	8	2	1	0113A1018_Enterococcus_faecalis_36_17	Enterococcus faecalis	A
qb307082014_D_scaffold_23|CRISPR|1|spacer|3of8| id=7296450 [location: 32373..32402 of 127710; DR: gttttactgataagaaattattgagagtacaaaaac]	CAAATCGTACATTTATAACCATCGCGAAAA	qb307082014_D_scaffold_23	GTTTTACTGATAAGAAATTATTGAGAGTACAAAAAC	0113A1018	8	3	1	0113A1018_Enterococcus_faecalis_36_17	Enterococcus faecalis	A
qb307082014_D_scaffold_23|CRISPR|1|spacer|4of8| id=7296450 [location: 32439..32468 of 127710; DR: gttttactgataagaaattattgagagtacaaaaac]	AAGCAGAAGAATTTATCAATGCTTCAAAAA	qb307082014_D_scaffold_23	GTTTTACTGATAAGAAATTATTGAGAGTACAAAAAC	0113A1018	8	4	1	0113A1018_Enterococcus_faecalis_36_17	Enterococcus faecalis	A
qb307082014_D_scaffold_23|CRISPR|1|spacer|5of8| id=7296450 [location: 32505..32534 of 127710; DR: gttttactgataagaaattattgagagtacaaaaac]	AAGAATGGGACCAGATCGGCTGGGGAACGA	qb307082014_D_scaffold_23	GTTTTACTGATAAGAAATTATTGAGAGTACAAAAAC	0113A1018	8	5	1	0113A1018_Enterococcus_faecalis_36_17	Enterococcus faecalis	A
qb307082014_D_scaffold_23|CRISPR|1|spacer|6of8| id=7296450 [location: 32571..32600 of 127710; DR: gttttactgataagaaattattgagagtacaaaaac]	TACTAATCGTTCATTCAATGCTTGCTCGTT	qb307082014_D_scaffold_23	GTTTTACTGATAAGAAATTATTGAGAGTACAAAAAC	0113A1018	8	6	1	0113A1018_Enterococcus_faecalis_36_17	Enterococcus faecalis	A
qb307082014_D_scaffold_23|CRISPR|1|spacer|7of8| id=7296450 [location: 32637..32666 of 127710; DR: gttttactgataagaaattattgagagtacaaaaac]	GATTGAGGGAATTTTGATTGATGCTGGTTA	qb307082014_D_scaffold_23	GTTTTACTGATAAGAAATTATTGAGAGTACAAAAAC	0113A1018	8	7	1	0113A1018_Enterococcus_faecalis_36_17	Enterococcus faecalis	A
qb307082014_D_scaffold_23|CRISPR|1|spacer|8of8| id=7296450 [location: 32703..32732 of 127710; DR: gttttactgataagaaattattgagagtacaaaaac]	ACCTTGTTGAAGAACGGTGAAATAGCTTTA	qb307082014_D_scaffold_23	GTTTTACTGATAAGAAATTATTGAGAGTACAAAAAC	0113A1018	8	8	1	0113A1018_Enterococcus_faecalis_36_17	Enterococcus faecalis	A
