# Supplementary material for: Identical bacterial populations colonize premature infant gut, skin, and oral microbiomes and exhibit different in situ growth rates
Source: Genome Res. 2017 Apr;27(4):601–12. doi: 10.1101/gr.213256.116 (PMC5378178; doi:10.1101/gr.213256.116)
Supplement: Supplemental Material [file supp_gr.213256.116_Supplemental_Table_S7.xlsx]

## Sheet: Single nucleotide varients
location	percent_reference	project	reference_base_count	scaffold	variant_base_count
38783	0.625	0505A	6	JBBB003D_scaffold_4	10
17212	0.55102	0505A	44	JBBB003D_scaffold_41	54
3161	0.115385	0505A	46	JBBB003D_scaffold_260	6
4792	0	0505A	58	JBBB003D_scaffold_1304	0
1	0	0505A	1	JBBB003D_scaffold_222	0
37269	0.0810811	0505A	34	JBBB003D_scaffold_58	3
75199	0.210526	0505A	15	JBBB003D_scaffold_53	4
14537	0.333333	0505A	14	JBBB003D_scaffold_223	7
3845	0	0505A	75	JBBB003D_scaffold_1345	0
22885	0	0505A	13	JBBB003D_scaffold_56	0
110391	0.761905	0505A	5	JBBB003D_scaffold_58	16
39317	0	0505A	1	JBBB003D_scaffold_101	0
4412	0.2	0505A	40	JBBB003D_scaffold_1345	10
749	0.1	0505A	18	JBBB003D_scaffold_12	2
115708	0.025	0505A	39	JBBB003D_scaffold_4	1
2	NA	0505A	0	JBBB003D_scaffold_1365	0
26741	0.0909091	0505A	20	JBBB003D_scaffold_56	2
2450	0.220588	0505A	53	JBBB003D_scaffold_170	15
37181	0.05	0505A	38	JBBB003D_scaffold_58	2
43163	0.277778	0505A	13	JBBB003D_scaffold_60	5
75203	0.210526	0505A	15	JBBB003D_scaffold_53	4
3743	1	0505A	0	JBBB003D_scaffold_529	41
114922	0.0434783	0505A	44	JBBB003D_scaffold_29	2
115666	0.0277778	0505A	35	JBBB003D_scaffold_4	1
3234	0.0117647	0505A	84	JBBB003D_scaffold_179	1
1	NA	0505A	0	JBBB003D_scaffold_1365	0
2385	0.666667	0505A	1	JBBB003D_scaffold_1312	2
17609	0.428571	0505A	8	JBBB003D_scaffold_29	6
24807	0.64	0505A	9	JBBB003D_scaffold_58	16
57532	NA	0505A	0	JBBB003D_scaffold_77	0
44618	0.210526	0505A	30	JBBB003D_scaffold_92	8
3446	0.257143	0505A	26	JBBB003D_scaffold_1304	9
14529	0.269231	0505A	19	JBBB003D_scaffold_223	7
3482	1	0505A	0	JBBB003D_scaffold_529	1
12491	0.285714	0505A	45	JBBB003D_scaffold_260	18
154585	0.415094	0505A	31	JBBB003D_scaffold_53	22
30952	0.0909091	0505A	30	JBBB003D_scaffold_12	3
3555	1	0505A	0	JBBB003D_scaffold_529	17
28454	0.357143	0505A	45	JBBB003D_scaffold_128	25
3472	1	0505A	0	JBBB003D_scaffold_529	1
18453	0.410256	0505A	46	JBBB003D_scaffold_183	32
579728	0.181818	0505A	9	JBBB003D_scaffold_4	2
5389	0.0149254	0505A	66	JBBB003D_scaffold_1345	1
3661	0.011236	0505A	88	JBBB003D_scaffold_179	1
2475	0	0505A	67	JBBB003D_scaffold_1304	0
4	0.909091	0505A	1	JBBB003D_scaffold_170	10
309196	0.287879	0505A	47	JBBB003D_scaffold_2	19
115663	0.0285714	0505A	34	JBBB003D_scaffold_4	1
12326	0.766667	0505A	14	JBBB003D_scaffold_223	46
279472	0.0243902	0505A	40	JBBB003D_scaffold_2	1
3732	1	0505A	0	JBBB003D_scaffold_529	45
94333	0.2	0505A	12	JBBB003D_scaffold_58	3
936	0	0505A	83	JBBB003D_scaffold_1304	0
143378	0.5	0505A	1	JBBB003D_scaffold_29	1
1	0.5	0505A	1	JBBB003D_scaffold_101	1
6597	NA	0505A	0	JBBB003D_scaffold_529	0
3844	0	0505A	75	JBBB003D_scaffold_1345	0
111397	0.376471	0505A	53	JBBB003D_scaffold_60	32
2557	0.152542	0505A	50	JBBB003D_scaffold_170	9
643	0.488095	0505A	43	JBBB003D_scaffold_12	41
37383	0.0277778	0505A	35	JBBB003D_scaffold_58	1
21701	0.666667	0505A	7	JBBB003D_scaffold_152	14
6321	0.625	0505A	3	JBBB003D_scaffold_1304	5
487193	0.0714286	0505A	13	JBBB003D_scaffold_4	1
4	0.9	0505A	1	JBBB003D_scaffold_116	9
3496	1	0505A	0	JBBB003D_scaffold_529	7
127788	0.166667	0505A	15	JBBB003D_scaffold_21	3
75205	0.05	0505A	19	JBBB003D_scaffold_53	1
2	0	0505A	2	JBBB003D_scaffold_260	0
1936	0.267857	0505A	41	JBBB003D_scaffold_260	15
590269	0.5	0505A	4	JBBB003D_scaffold_4	4
3466	0.26087	0505A	17	JBBB003D_scaffold_1304	6
3943	0	0505A	67	JBBB003D_scaffold_1345	0
2	0.5	0505A	1	JBBB003D_scaffold_116	1
3528	1	0505A	0	JBBB003D_scaffold_529	10
251034	0	0505A	38	JBBB003D_scaffold_2	0
24805	0.166667	0505A	15	JBBB003D_scaffold_58	3
2	0.714286	0505A	4	JBBB003D_scaffold_103	10
3296	NA	0505A	0	JBBB003D_scaffold_997	0
5801	0	0505A	70	JBBB003D_scaffold_1345	0
41779	0	0505A	3	JBBB003D_scaffold_128	0
33919	1	0505A	0	JBBB003D_scaffold_116	1
111381	0.494505	0505A	46	JBBB003D_scaffold_60	45
3910	0.0135135	0505A	73	JBBB003D_scaffold_1345	1
251485	0.0444444	0505A	43	JBBB003D_scaffold_2	2
68859	0.142857	0505A	18	JBBB003D_scaffold_2	3
403007	0.25	0505A	18	JBBB003D_scaffold_4	6
3177	0.390244	0505A	25	JBBB003D_scaffold_170	16
2923	0.242424	0505A	25	JBBB003D_scaffold_1345	8
1005	0.166667	0505A	10	JBBB003D_scaffold_170	2
28278	NA	0505A	0	JBBB003D_scaffold_172	0
2	0.3	0505A	7	JBBB003D_scaffold_179	3
3031	0.142857	0505A	36	JBBB003D_scaffold_170	6
6333	0.428571	0505A	4	JBBB003D_scaffold_1345	3
1	0	0505A	1	JBBB003D_scaffold_260	0
5675	0	0505A	33	JBBB003D_scaffold_1304	0
3	0.875	0505A	2	JBBB003D_scaffold_29	14
1	0	0505A	2	JBBB003D_scaffold_1312	0
12558	0.450704	0505A	39	JBBB003D_scaffold_260	32
18647	0.314286	0505A	24	JBBB003D_scaffold_183	11
487096	0.326531	0505A	33	JBBB003D_scaffold_4	16
274	0.16	0505A	42	JBBB003D_scaffold_12	8
68862	0.558824	0505A	15	JBBB003D_scaffold_2	19
6013	0	0505A	93	JBBB003D_scaffold_1304	0
6642	NA	0505A	0	JBBB003D_scaffold_529	0
650	0	0505A	85	JBBB003D_scaffold_1304	0
6103	0	0505A	79	JBBB003D_scaffold_1304	0
445	0.3875	0505A	49	JBBB003D_scaffold_12	31
26728	0.238095	0505A	16	JBBB003D_scaffold_56	5
17161	0.279412	0505A	49	JBBB003D_scaffold_41	19
119954	0.5	0505A	1	JBBB003D_scaffold_25	1
36636	0.275862	0505A	21	JBBB003D_scaffold_260	8
6058	0	0505A	81	JBBB003D_scaffold_1345	0
12566	0.457143	0505A	38	JBBB003D_scaffold_260	32
26733	0.176471	0505A	14	JBBB003D_scaffold_56	3
4	0.785714	0505A	3	JBBB003D_scaffold_127	11
5807	0	0505A	101	JBBB003D_scaffold_1304	0
403010	0.333333	0505A	12	JBBB003D_scaffold_4	6
676	0	0505A	83	JBBB003D_scaffold_1304	0
44482	0.278351	0505A	70	JBBB003D_scaffold_92	27
17605	0.2	0505A	8	JBBB003D_scaffold_29	2
14087	NA	0505A	0	JBBB003D_scaffold_389	0
3114	0.14	0505A	43	JBBB003D_scaffold_103	7
36797	0.383394	0505A	505	JBBB003D_scaffold_260	314
30867	0.04	0505A	24	JBBB003D_scaffold_12	1
239510	1	0505A	0	JBBB003D_scaffold_58	3
33916	0.733333	0505A	4	JBBB003D_scaffold_116	11
988	0.416667	0505A	7	JBBB003D_scaffold_170	5
37422	0	0505A	37	JBBB003D_scaffold_58	0
1009	0.0909091	0505A	10	JBBB003D_scaffold_170	1
97746	0.12963	0505A	47	JBBB003D_scaffold_56	7
3142	0.210526	0505A	45	JBBB003D_scaffold_260	12
176464	0.185185	0505A	22	JBBB003D_scaffold_21	5
3759	1	0505A	0	JBBB003D_scaffold_529	37
3163	0.386364	0505A	27	JBBB003D_scaffold_170	17
17608	0.625	0505A	9	JBBB003D_scaffold_29	15
402909	0.325	0505A	27	JBBB003D_scaffold_4	13
4780	0	0505A	59	JBBB003D_scaffold_1304	0
3515	0	0505A	49	JBBB003D_scaffold_1304	0
14544	0.173913	0505A	19	JBBB003D_scaffold_223	4
30825	0.111111	0505A	24	JBBB003D_scaffold_12	3
1834	0.641026	0505A	14	JBBB003D_scaffold_1304	25
119700	0.666667	0505A	1	JBBB003D_scaffold_56	2
403011	0.25	0505A	9	JBBB003D_scaffold_4	3
4765	0	0505A	93	JBBB003D_scaffold_1345	0
3791	1	0505A	0	JBBB003D_scaffold_529	23
2912	0.428571	0505A	28	JBBB003D_scaffold_1345	21
6320	0.142857	0505A	12	JBBB003D_scaffold_1304	2
28500	0.230769	0505A	50	JBBB003D_scaffold_128	15
2355	0	0505A	74	JBBB003D_scaffold_179	0
875	0	0505A	94	JBBB003D_scaffold_1304	0
3596	1	0505A	0	JBBB003D_scaffold_529	31
28533	0.0862069	0505A	53	JBBB003D_scaffold_128	5
12454	0.689655	0505A	9	JBBB003D_scaffold_170	20
12437	0.210526	0505A	15	JBBB003D_scaffold_154	4
37149	0.0322581	0505A	30	JBBB003D_scaffold_58	1
38777	0.269231	0505A	19	JBBB003D_scaffold_4	7
3485	0	0505A	34	JBBB003D_scaffold_1304	0
751	0.166667	0505A	10	JBBB003D_scaffold_12	2
38793	0.181818	0505A	18	JBBB003D_scaffold_4	4
2	NA	0505A	0	JBBB003D_scaffold_1333	0
57533	0	0505A	1	JBBB003D_scaffold_77	0
3040	0.238095	0505A	32	JBBB003D_scaffold_170	10
28527	0.0961538	0505A	47	JBBB003D_scaffold_128	5
2459	0.142857	0505A	60	JBBB003D_scaffold_170	10
97765	0.242424	0505A	50	JBBB003D_scaffold_56	16
44517	0.712766	0505A	27	JBBB003D_scaffold_92	67
24353	0.461538	0505A	7	JBBB003D_scaffold_260	6
3	1	0505A	0	JBBB003D_scaffold_1333	1
2581	0.156863	0505A	43	JBBB003D_scaffold_170	8
2778	0	0505A	81	JBBB003D_scaffold_1345	0
37485	0	0505A	39	JBBB003D_scaffold_58	0
129768	0.294118	0505A	12	JBBB003D_scaffold_29	5
154691	0.25	0505A	6	JBBB003D_scaffold_53	2
4	0.958333	0505A	1	JBBB003D_scaffold_1345	23
41780	0.333333	0505A	2	JBBB003D_scaffold_128	1
5293	0	0505A	79	JBBB003D_scaffold_1345	0
18651	0.153846	0505A	22	JBBB003D_scaffold_183	4
3	0.888889	0505A	2	JBBB003D_scaffold_152	16
4019	NA	0505A	0	JBBB003D_scaffold_766	0
37332	0.0294118	0505A	33	JBBB003D_scaffold_58	1
18549	0.420455	0505A	51	JBBB003D_scaffold_183	37
6630	NA	0505A	0	JBBB003D_scaffold_529	0
154470	0.380952	0505A	39	JBBB003D_scaffold_53	24
3579	1	0505A	0	JBBB003D_scaffold_529	23
579729	0	0505A	10	JBBB003D_scaffold_4	0
29872	0.25	0505A	3	JBBB003D_scaffold_223	1
11068	NA	0505A	0	JBBB003D_scaffold_756	0
12427	0.227273	0505A	17	JBBB003D_scaffold_154	5
86779	0.2	0505A	12	JBBB003D_scaffold_41	3
24801	0.56	0505A	11	JBBB003D_scaffold_58	14
3242	0.88	0505A	3	JBBB003D_scaffold_1304	22
3120	0.320755	0505A	36	JBBB003D_scaffold_170	17
15548	0	0505A	2	JBBB003D_scaffold_222	0
12425	0.222222	0505A	14	JBBB003D_scaffold_154	4
251476	0.0487805	0505A	39	JBBB003D_scaffold_2	2
1039	0.666667	0505A	3	JBBB003D_scaffold_92	6
94312	0.418182	0505A	32	JBBB003D_scaffold_58	23
3082	0.395833	0505A	29	JBBB003D_scaffold_170	19
110396	0.0714286	0505A	13	JBBB003D_scaffold_58	1
100	0	0505A	56	JBBB003D_scaffold_1345	0
6606	NA	0505A	0	JBBB003D_scaffold_529	0
30781	0.128205	0505A	34	JBBB003D_scaffold_12	5
44791	0.194444	0505A	58	JBBB003D_scaffold_92	14
18405	0.25	0505A	48	JBBB003D_scaffold_183	16
3617	NA	0505A	0	JBBB003D_scaffold_756	0
2	0.666667	0505A	1	JBBB003D_scaffold_170	2
7988	NA	0505A	0	JBBB003D_scaffold_756	0
44620	0.439024	0505A	23	JBBB003D_scaffold_92	18
154492	0.428571	0505A	28	JBBB003D_scaffold_53	21
3898	0	0505A	78	JBBB003D_scaffold_1345	0
38779	0.535714	0505A	13	JBBB003D_scaffold_4	15
37547	0.0465116	0505A	41	JBBB003D_scaffold_58	2
3	0.75	0505A	2	JBBB003D_scaffold_183	6
18756	0.219512	0505A	32	JBBB003D_scaffold_183	9
14187	1	0505A	0	JBBB003D_scaffold_152	59
998	0.142857	0505A	6	JBBB003D_scaffold_170	1
19172	0.785714	0505A	3	JBBB003D_scaffold_183	11
75209	0.217391	0505A	18	JBBB003D_scaffold_53	5
278340	0	0505A	48	JBBB003D_scaffold_2	0
4	0.85	0505A	3	JBBB003D_scaffold_29	17
57531	0	0505A	2	JBBB003D_scaffold_77	0
218026	0.428571	0505A	32	JBBB003D_scaffold_21	24
5998	0.010989	0505A	90	JBBB003D_scaffold_1304	1
1833	0.301887	0505A	37	JBBB003D_scaffold_1304	16
94319	0.318182	0505A	15	JBBB003D_scaffold_58	7
4	0	0505A	4	JBBB003D_scaffold_183	0
218064	0.396226	0505A	32	JBBB003D_scaffold_21	21
3479	0	0505A	35	JBBB003D_scaffold_1304	0
7993	NA	0505A	0	JBBB003D_scaffold_756	0
60	0.357143	0505A	18	JBBB003D_scaffold_25	10
66418	0.25	0505A	3	JBBB003D_scaffold_92	1
3183	0.235294	0505A	39	JBBB003D_scaffold_170	12
3	NA	0505A	0	JBBB003D_scaffold_997	0
12460	0.411765	0505A	10	JBBB003D_scaffold_170	7
3484	NA	0505A	0	JBBB003D_scaffold_529	0
754	0	0505A	11	JBBB003D_scaffold_12	0
114406	0.0322581	0505A	30	JBBB003D_scaffold_29	1
5809	0	0505A	100	JBBB003D_scaffold_1304	0
3	0.166667	0505A	5	JBBB003D_scaffold_101	1
936	0.787234	0505A	30	JBBB003D_scaffold_173	111
3457	0.592593	0505A	11	JBBB003D_scaffold_1304	16
31562	0.183673	0505A	40	JBBB003D_scaffold_170	9
160	0	0505A	76	JBBB003D_scaffold_1345	0
86772	0.416667	0505A	21	JBBB003D_scaffold_41	15
3293	NA	0505A	0	JBBB003D_scaffold_997	0
872	0	0505A	92	JBBB003D_scaffold_1304	0
1	0.428571	0505A	4	JBBB003D_scaffold_103	3
12537	0.237288	0505A	45	JBBB003D_scaffold_260	14
1	0.333333	0505A	4	JBBB003D_scaffold_1304	2
3153	0	0505A	72	JBBB003D_scaffold_179	0
97931	0.272727	0505A	24	JBBB003D_scaffold_56	9
86735	0.216216	0505A	29	JBBB003D_scaffold_41	8
889	0.776224	0505A	32	JBBB003D_scaffold_173	111
3721	1	0505A	0	JBBB003D_scaffold_529	50
143376	0	0505A	8	JBBB003D_scaffold_29	0
3128	0.220339	0505A	46	JBBB003D_scaffold_260	13
2254	NA	0505A	0	JBBB003D_scaffold_1365	0
3403	0	0505A	83	JBBB003D_scaffold_179	0
5836	0	0505A	103	JBBB003D_scaffold_1304	0
2	0.5	0505A	1	JBBB003D_scaffold_222	1
36855	0.837782	0505A	79	JBBB003D_scaffold_260	408
3	0.75	0505A	1	JBBB003D_scaffold_170	3
1132	0.311111	0505A	31	JBBB003D_scaffold_1304	14
2384	0	0505A	4	JBBB003D_scaffold_1312	0
4810	0.0625	0505A	60	JBBB003D_scaffold_1304	4
12453	0.791667	0505A	5	JBBB003D_scaffold_170	19
5	0	0505A	3	JBBB003D_scaffold_4	0
590270	0.25	0505A	3	JBBB003D_scaffold_4	1
251764	0	0505A	49	JBBB003D_scaffold_2	0
36641	0.433333	0505A	17	JBBB003D_scaffold_260	13
68757	0.245763	0505A	89	JBBB003D_scaffold_2	29
22900	0.125	0505A	7	JBBB003D_scaffold_56	1
1	1	0505A	0	JBBB003D_scaffold_29	2
2	NA	0505A	0	JBBB003D_scaffold_21	0
68850	0.564103	0505A	17	JBBB003D_scaffold_2	22
18432	0.341772	0505A	52	JBBB003D_scaffold_183	27
6088	0	0505A	83	JBBB003D_scaffold_1304	0
26757	0.0769231	0505A	12	JBBB003D_scaffold_56	1
995	0.166667	0505A	10	JBBB003D_scaffold_170	2
3831	0.3	0505A	21	JBBB003D_scaffold_179	9
143374	0.444444	0505A	5	JBBB003D_scaffold_29	4
1	1	0505A	0	JBBB003D_scaffold_223	6
625	0.478723	0505A	49	JBBB003D_scaffold_12	45
5654	0.205882	0505A	27	JBBB003D_scaffold_1304	7
97737	0.111111	0505A	48	JBBB003D_scaffold_56	6
21700	0.533333	0505A	7	JBBB003D_scaffold_152	8
174184	0.761905	0505A	10	JBBB003D_scaffold_58	32
121	0	0505A	73	JBBB003D_scaffold_1304	0
12536	0.155556	0505A	76	JBBB003D_scaffold_260	14
3646	1	0505A	0	JBBB003D_scaffold_529	45
4	0.897436	0505A	4	JBBB003D_scaffold_1304	35
4	0.909091	0505A	4	JBBB003D_scaffold_1312	40
17229	0.266055	0505A	80	JBBB003D_scaffold_41	29
26739	0.307692	0505A	18	JBBB003D_scaffold_56	8
97928	0.606061	0505A	13	JBBB003D_scaffold_56	20
3689	0.0294118	0505A	33	JBBB003D_scaffold_389	1
2242	0	0505A	75	JBBB003D_scaffold_1304	0
5704	0	0505A	78	JBBB003D_scaffold_1345	0
403020	0.133333	0505A	13	JBBB003D_scaffold_4	2
2256	NA	0505A	0	JBBB003D_scaffold_1365	0
251782	0.0212766	0505A	46	JBBB003D_scaffold_2	1
2	0.625	0505A	3	JBBB003D_scaffold_183	5
7997	NA	0505A	0	JBBB003D_scaffold_756	0
992	0.307692	0505A	9	JBBB003D_scaffold_170	4
66419	0	0505A	1	JBBB003D_scaffold_92	0
32048	0.75	0505A	1	JBBB003D_scaffold_170	3
127783	0.2	0505A	12	JBBB003D_scaffold_21	3
4	0.875	0505A	2	JBBB003D_scaffold_200	14
4	NA	0505A	0	JBBB003D_scaffold_1365	0
31669	0.214286	0505A	44	JBBB003D_scaffold_170	12
37176	0.0526316	0505A	36	JBBB003D_scaffold_58	2
3830	0.458333	0505A	13	JBBB003D_scaffold_179	11
36642	0.631579	0505A	14	JBBB003D_scaffold_260	24
12319	0.1	0505A	9	JBBB003D_scaffold_223	1
1006	0.0833333	0505A	11	JBBB003D_scaffold_170	1
38780	0.529412	0505A	8	JBBB003D_scaffold_4	9
239509	0.8	0505A	1	JBBB003D_scaffold_58	4
37293	0.0322581	0505A	30	JBBB003D_scaffold_58	1
12535	0.186667	0505A	61	JBBB003D_scaffold_260	14
251230	0	0505A	45	JBBB003D_scaffold_2	0
278666	0.027027	0505A	36	JBBB003D_scaffold_2	1
579595	0.217391	0505A	36	JBBB003D_scaffold_4	10
5402	0	0505A	72	JBBB003D_scaffold_1304	0
4	0.75	0505A	2	JBBB003D_scaffold_128	6
4	0.909091	0505A	2	JBBB003D_scaffold_53	20
487191	0	0505A	14	JBBB003D_scaffold_4	0
1900	0.288462	0505A	37	JBBB003D_scaffold_260	15
997	0.142857	0505A	6	JBBB003D_scaffold_170	1
6010	0	0505A	94	JBBB003D_scaffold_1304	0
2	0	0505A	2	JBBB003D_scaffold_53	0
21220	NA	0505A	0	JBBB003D_scaffold_389	0
3	0.6	0505A	4	JBBB003D_scaffold_25	6
2383	0.75	0505A	2	JBBB003D_scaffold_1312	6
36796	0.451677	0505A	278	JBBB003D_scaffold_260	229
2189	0	0505A	77	JBBB003D_scaffold_1304	0
251032	0	0505A	38	JBBB003D_scaffold_2	0
18434	0.35443	0505A	51	JBBB003D_scaffold_183	28
38376	0.2	0505A	8	JBBB003D_scaffold_103	2
36744	0.847087	0505A	63	JBBB003D_scaffold_260	349
97813	0.373134	0505A	42	JBBB003D_scaffold_56	25
279242	0.0769231	0505A	36	JBBB003D_scaffold_2	3
251467	0.047619	0505A	40	JBBB003D_scaffold_2	2
37546	0.0465116	0505A	41	JBBB003D_scaffold_58	2
2726	0.780952	0505A	23	JBBB003D_scaffold_1304	82
2600	0.0816327	0505A	45	JBBB003D_scaffold_170	4
97916	0.22	0505A	39	JBBB003D_scaffold_56	11
24334	0	0505A	15	JBBB003D_scaffold_260	0
24339	0.125	0505A	14	JBBB003D_scaffold_260	2
277	0.16	0505A	42	JBBB003D_scaffold_12	8
579620	0.292683	0505A	29	JBBB003D_scaffold_4	12
3476	1	0505A	0	JBBB003D_scaffold_529	1
4600	0	0505A	72	JBBB003D_scaffold_1304	0
31577	0.255319	0505A	35	JBBB003D_scaffold_170	12
26761	0.0714286	0505A	13	JBBB003D_scaffold_56	1
17610	0.428571	0505A	8	JBBB003D_scaffold_29	6
1	NA	0505A	0	JBBB003D_scaffold_21	0
1012	0.0833333	0505A	11	JBBB003D_scaffold_170	1
22888	0.2	0505A	12	JBBB003D_scaffold_56	3
37159	0.4	0505A	6	JBBB003D_scaffold_260	4
86774	0.628571	0505A	13	JBBB003D_scaffold_41	22
575	0.50495	0505A	50	JBBB003D_scaffold_12	51
278622	0.0606061	0505A	31	JBBB003D_scaffold_2	2
3483	0	0505A	1	JBBB003D_scaffold_529	0
2	0	0505A	6	JBBB003D_scaffold_223	0
19176	0	0505A	1	JBBB003D_scaffold_183	0
174183	0.0666667	0505A	14	JBBB003D_scaffold_58	1
3226	1	0505A	0	JBBB003D_scaffold_1304	15
3	0.25	0505A	3	JBBB003D_scaffold_173	1
95383	0.294872	0505A	55	JBBB003D_scaffold_41	23
143373	0.636364	0505A	8	JBBB003D_scaffold_29	14
111407	0.559524	0505A	37	JBBB003D_scaffold_60	47
1	0	0505A	3	JBBB003D_scaffold_172	0
94316	0.3	0505A	21	JBBB003D_scaffold_58	9
278384	0	0505A	46	JBBB003D_scaffold_2	0
14531	0.391304	0505A	14	JBBB003D_scaffold_223	9
154690	0.181818	0505A	9	JBBB003D_scaffold_53	2
3981	0	0505A	83	JBBB003D_scaffold_1304	0
2	0.8	0505A	1	JBBB003D_scaffold_58	4
3188	0.3	0505A	28	JBBB003D_scaffold_170	12
44413	0.145161	0505A	53	JBBB003D_scaffold_92	9
154210	0.237288	0505A	45	JBBB003D_scaffold_53	14
1	0.5	0505A	2	JBBB003D_scaffold_1872	2
37197	0.0444444	0505A	43	JBBB003D_scaffold_58	2
18410	0.27027	0505A	54	JBBB003D_scaffold_183	20
9023	0.166667	0505A	10	JBBB003D_scaffold_389	2
571	0.524272	0505A	49	JBBB003D_scaffold_12	54
6319	0.153846	0505A	11	JBBB003D_scaffold_1304	2
1394	0.6	0505A	2	JBBB003D_scaffold_1872	3
6609	NA	0505A	0	JBBB003D_scaffold_529	0
1035	0	0505A	72	JBBB003D_scaffold_1304	0
1247	0	0505A	84	JBBB003D_scaffold_1304	0
97744	0.109091	0505A	49	JBBB003D_scaffold_56	6
278701	0.0425532	0505A	45	JBBB003D_scaffold_2	2
249	0	0505A	80	JBBB003D_scaffold_1345	0
3671	0.0666667	0505A	28	JBBB003D_scaffold_389	2
598	0.488889	0505A	46	JBBB003D_scaffold_12	44
2914	0.5	0505A	34	JBBB003D_scaffold_1345	34
127792	0.5	0505A	16	JBBB003D_scaffold_21	16
1839	0.585366	0505A	17	JBBB003D_scaffold_1304	24
2387	0	0505A	2	JBBB003D_scaffold_1312	0
579727	0.153846	0505A	11	JBBB003D_scaffold_4	2
138267	0.133333	0505A	13	JBBB003D_scaffold_53	2
17086	0.333333	0505A	4	JBBB003D_scaffold_200	2
95508	0.25	0505A	6	JBBB003D_scaffold_41	2
4141	NA	0505A	0	JBBB003D_scaffold_766	0
2903	0.21875	0505A	25	JBBB003D_scaffold_1345	7
2437	0.157895	0505A	48	JBBB003D_scaffold_170	9
114595	0.075	0505A	37	JBBB003D_scaffold_29	3
75197	0.210526	0505A	15	JBBB003D_scaffold_53	4
12327	0.117647	0505A	15	JBBB003D_scaffold_223	2
1853	0.229167	0505A	37	JBBB003D_scaffold_260	11
4	0.866667	0505A	2	JBBB003D_scaffold_92	13
86776	0.238095	0505A	16	JBBB003D_scaffold_41	5
3834	0.4	0505A	12	JBBB003D_scaffold_179	8
111409	0.559524	0505A	37	JBBB003D_scaffold_60	47
3839	1	0505A	0	JBBB003D_scaffold_529	3
2449	0.184615	0505A	53	JBBB003D_scaffold_170	12
5844	0	0505A	101	JBBB003D_scaffold_1304	0
12565	0.457143	0505A	38	JBBB003D_scaffold_260	32
19519	0.25	0505A	3	JBBB003D_scaffold_173	1
3913	0	0505A	73	JBBB003D_scaffold_1345	0
95507	0.166667	0505A	10	JBBB003D_scaffold_41	2
251090	0	0505A	33	JBBB003D_scaffold_2	0
44708	0.273973	0505A	53	JBBB003D_scaffold_92	20
2729	0.0526316	0505A	18	JBBB003D_scaffold_1304	1
239507	0.2	0505A	4	JBBB003D_scaffold_58	1
31108	0.025641	0505A	38	JBBB003D_scaffold_12	1
3342	NA	0505A	0	JBBB003D_scaffold_997	0
129776	0.105263	0505A	17	JBBB003D_scaffold_29	2
3	0.897436	0505A	4	JBBB003D_scaffold_179	35
94140	0.222222	0505A	35	JBBB003D_scaffold_58	10
1971	0	0505A	74	JBBB003D_scaffold_1345	0
251494	0.0416667	0505A	46	JBBB003D_scaffold_2	2
4	0	0505A	9	JBBB003D_scaffold_222	0
18649	0.6	0505A	10	JBBB003D_scaffold_183	15
11071	NA	0505A	0	JBBB003D_scaffold_756	0
335	0	0505A	84	JBBB003D_scaffold_1345	0
278425	0.0263158	0505A	37	JBBB003D_scaffold_2	1
174177	0.333333	0505A	10	JBBB003D_scaffold_58	5
29303	0.0769231	0505A	12	JBBB003D_scaffold_127	1
182314	0	0505A	3	JBBB003D_scaffold_12	0
37292	0.0909091	0505A	30	JBBB003D_scaffold_58	3
278419	0	0505A	35	JBBB003D_scaffold_2	0
38788	0.6875	0505A	5	JBBB003D_scaffold_4	11
251425	0.0652174	0505A	43	JBBB003D_scaffold_2	3
129759	0.111111	0505A	16	JBBB003D_scaffold_29	2
4756	0	0505A	91	JBBB003D_scaffold_1345	0
4	0	0505A	3	JBBB003D_scaffold_12	0
174175	0.266667	0505A	11	JBBB003D_scaffold_58	4
3	0.9	0505A	1	JBBB003D_scaffold_2	9
3922	0	0505A	68	JBBB003D_scaffold_1345	0
154593	0.403846	0505A	31	JBBB003D_scaffold_53	21
541	0.536082	0505A	45	JBBB003D_scaffold_12	52
1	1	0505A	0	JBBB003D_scaffold_116	2
119702	0.75	0505A	1	JBBB003D_scaffold_56	3
37163	0.0277778	0505A	35	JBBB003D_scaffold_58	1
8566	NA	0505A	0	JBBB003D_scaffold_766	0
12519	0.371429	0505A	44	JBBB003D_scaffold_260	26
138257	0.727273	0505A	6	JBBB003D_scaffold_53	16
2320	0	0505A	1	JBBB003D_scaffold_1333	0
119698	0.818182	0505A	6	JBBB003D_scaffold_56	27
1939	0.277778	0505A	39	JBBB003D_scaffold_260	15
86614	0.132075	0505A	46	JBBB003D_scaffold_41	7
43165	0.666667	0505A	16	JBBB003D_scaffold_60	32
4	0.823529	0505A	3	JBBB003D_scaffold_56	14
2919	0.365854	0505A	26	JBBB003D_scaffold_1345	15
1835	0.615385	0505A	15	JBBB003D_scaffold_1304	24
14528	0.259259	0505A	20	JBBB003D_scaffold_223	7
39316	0	0505A	1	JBBB003D_scaffold_101	0
63338	0.288462	0505A	37	JBBB003D_scaffold_41	15
2285	0.235294	0505A	13	JBBB003D_scaffold_1345	4
2	0.4	0505A	3	JBBB003D_scaffold_2	2
3748	0	0505A	38	JBBB003D_scaffold_529	0
21705	NA	0505A	0	JBBB003D_scaffold_152	0
1013	0.0833333	0505A	11	JBBB003D_scaffold_170	1
1	0	0505A	2	JBBB003D_scaffold_200	0
17051	0.470588	0505A	9	JBBB003D_scaffold_29	8
24815	0	0505A	17	JBBB003D_scaffold_58	0
2354	0	0505A	74	JBBB003D_scaffold_179	0
6043	0	0505A	80	JBBB003D_scaffold_1304	0
1137	0.219512	0505A	32	JBBB003D_scaffold_1304	9
1641	0	0505A	87	JBBB003D_scaffold_1304	0
129757	0.3125	0505A	11	JBBB003D_scaffold_29	5
1	0	0505A	2	JBBB003D_scaffold_56	0
635	0	0505A	85	JBBB003D_scaffold_1304	0
1843	0.738462	0505A	34	JBBB003D_scaffold_1304	96
182316	0.333333	0505A	2	JBBB003D_scaffold_12	1
2453	0.238806	0505A	51	JBBB003D_scaffold_170	16
174160	0	0505A	17	JBBB003D_scaffold_58	0
1570	0	0505A	67	JBBB003D_scaffold_1304	0
1584	0	0505A	65	JBBB003D_scaffold_1304	0
75204	0.210526	0505A	15	JBBB003D_scaffold_53	4
63314	0.280702	0505A	41	JBBB003D_scaffold_41	16
17088	0	0505A	2	JBBB003D_scaffold_200	0
1948	0	0505A	77	JBBB003D_scaffold_1304	0
360755	0.6	0505A	2	JBBB003D_scaffold_2	3
44601	0.47619	0505A	22	JBBB003D_scaffold_92	20
18646	0.2	0505A	20	JBBB003D_scaffold_183	5
251320	0	0505A	46	JBBB003D_scaffold_2	0
21222	NA	0505A	0	JBBB003D_scaffold_389	0
3700	0	0505A	80	JBBB003D_scaffold_179	0
5797	0	0505A	102	JBBB003D_scaffold_1304	0
1219	0	0505A	67	JBBB003D_scaffold_1304	0
2317	0.333333	0505A	6	JBBB003D_scaffold_1333	3
57530	0.4	0505A	3	JBBB003D_scaffold_77	2
9019	0.833333	0505A	3	JBBB003D_scaffold_389	15
12428	0.272727	0505A	16	JBBB003D_scaffold_154	6
6322	0.333333	0505A	4	JBBB003D_scaffold_1304	2
33214	0.5	0505A	3	JBBB003D_scaffold_154	3
755	0.0769231	0505A	12	JBBB003D_scaffold_12	1
218052	0.464286	0505A	30	JBBB003D_scaffold_21	26
1659	0	0505A	80	JBBB003D_scaffold_1304	0
3	0.666667	0505A	1	JBBB003D_scaffold_128	2
3468	NA	0505A	0	JBBB003D_scaffold_529	0
173528	0.272727	0505A	16	JBBB003D_scaffold_21	6
24355	0.470588	0505A	9	JBBB003D_scaffold_260	8
86777	0.4	0505A	12	JBBB003D_scaffold_41	8
28512	0.2	0505A	48	JBBB003D_scaffold_128	12
3789	0	0505A	23	JBBB003D_scaffold_529	0
1975	0.25	0505A	39	JBBB003D_scaffold_260	13
508	0.511628	0505A	42	JBBB003D_scaffold_12	44
28277	NA	0505A	0	JBBB003D_scaffold_172	0
114424	0.0645161	0505A	29	JBBB003D_scaffold_29	2
403008	0.533333	0505A	14	JBBB003D_scaffold_4	16
111370	0.482759	0505A	45	JBBB003D_scaffold_60	42
37290	0.03125	0505A	31	JBBB003D_scaffold_58	1
182315	0	0505A	1	JBBB003D_scaffold_12	0
68639	0.289157	0505A	59	JBBB003D_scaffold_2	24
614	0	0505A	92	JBBB003D_scaffold_1304	0
2913	0.531915	0505A	22	JBBB003D_scaffold_1345	25
26747	0.375	0505A	10	JBBB003D_scaffold_56	6
218162	0.375	0505A	5	JBBB003D_scaffold_21	3
3243	1	0505A	0	JBBB003D_scaffold_1304	18
6329	0.636364	0505A	8	JBBB003D_scaffold_1345	14
604	0.494505	0505A	46	JBBB003D_scaffold_12	45
68615	0.140625	0505A	55	JBBB003D_scaffold_2	9
579738	0.333333	0505A	6	JBBB003D_scaffold_4	3
1	0.5	0505A	1	JBBB003D_scaffold_41	1
3038	0.232558	0505A	33	JBBB003D_scaffold_170	10
6330	0.5	0505A	5	JBBB003D_scaffold_1345	5
111325	0.153846	0505A	44	JBBB003D_scaffold_60	8
12438	0.53125	0505A	15	JBBB003D_scaffold_154	17
44697	0.283582	0505A	48	JBBB003D_scaffold_92	19
97926	0.30303	0505A	23	JBBB003D_scaffold_56	10
182313	0.666667	0505A	2	JBBB003D_scaffold_12	4
41777	0.333333	0505A	2	JBBB003D_scaffold_128	1
44523	0.723404	0505A	26	JBBB003D_scaffold_92	68
3	0.6	0505A	4	JBBB003D_scaffold_1312	6
415	0.295775	0505A	50	JBBB003D_scaffold_12	21
1007	0.111111	0505A	8	JBBB003D_scaffold_170	1
487188	0.0588235	0505A	16	JBBB003D_scaffold_4	1
115678	0.025	0505A	39	JBBB003D_scaffold_4	1
1625	0	0505A	83	JBBB003D_scaffold_1304	0
3080	0.203125	0505A	51	JBBB003D_scaffold_260	13
37560	0.0612245	0505A	46	JBBB003D_scaffold_58	3
577	0.50495	0505A	50	JBBB003D_scaffold_12	51
218024	0.264706	0505A	50	JBBB003D_scaffold_21	18
9769	NA	0505A	0	JBBB003D_scaffold_766	0
12441	0.222222	0505A	14	JBBB003D_scaffold_154	4
12434	0.363636	0505A	7	JBBB003D_scaffold_154	4
17054	0.473684	0505A	10	JBBB003D_scaffold_29	9
1051	0.0769231	0505A	12	JBBB003D_scaffold_92	1
2292	0.473684	0505A	10	JBBB003D_scaffold_1345	9
17604	0.111111	0505A	8	JBBB003D_scaffold_29	1
309190	0.537313	0505A	31	JBBB003D_scaffold_2	36
22882	0.0666667	0505A	14	JBBB003D_scaffold_56	1
37296	0.0285714	0505A	34	JBBB003D_scaffold_58	1
2	0.666667	0505A	1	JBBB003D_scaffold_200	2
50903	0	0505A	44	JBBB003D_scaffold_60	0
14530	0.25	0505A	18	JBBB003D_scaffold_223	6
39318	NA	0505A	0	JBBB003D_scaffold_101	0
3829	0.0416667	0505A	23	JBBB003D_scaffold_179	1
24343	0.458333	0505A	13	JBBB003D_scaffold_260	11
18669	0.333333	0505A	8	JBBB003D_scaffold_183	4
43157	0.0833333	0505A	11	JBBB003D_scaffold_60	1
4	0	0505A	4	JBBB003D_scaffold_260	0
4023	NA	0505A	0	JBBB003D_scaffold_766	0
241993	1	0505A	0	JBBB003D_scaffold_4	27
1049	0.333333	0505A	8	JBBB003D_scaffold_92	4
111505	0.3	0505A	7	JBBB003D_scaffold_60	3
68856	0.26087	0505A	17	JBBB003D_scaffold_2	6
22892	0.76	0505A	12	JBBB003D_scaffold_56	38
75208	0.333333	0505A	16	JBBB003D_scaffold_53	8
1831	0.208333	0505A	38	JBBB003D_scaffold_1304	10
37368	0.0285714	0505A	34	JBBB003D_scaffold_58	1
487195	0.0833333	0505A	11	JBBB003D_scaffold_4	1
114421	0.0625	0505A	30	JBBB003D_scaffold_29	2
2	0.4	0505A	3	JBBB003D_scaffold_172	2
3177	0.240741	0505A	41	JBBB003D_scaffold_103	13
4390	0.0153846	0505A	64	JBBB003D_scaffold_1304	1
36734	0.76834	0505A	60	JBBB003D_scaffold_260	199
590273	0.666667	0505A	1	JBBB003D_scaffold_4	2
5755	0	0505A	90	JBBB003D_scaffold_1304	0
37134	0	0505A	29	JBBB003D_scaffold_58	0
827	0.563218	0505A	38	JBBB003D_scaffold_173	49
590271	0.5	0505A	2	JBBB003D_scaffold_4	2
97745	0.12963	0505A	47	JBBB003D_scaffold_56	7
5688	0	0505A	37	JBBB003D_scaffold_1304	0
154456	0.297297	0505A	26	JBBB003D_scaffold_53	11
3928	0	0505A	71	JBBB003D_scaffold_1345	0
26743	0.16	0505A	21	JBBB003D_scaffold_56	4
3	0.363636	0505A	7	JBBB003D_scaffold_1345	4
97932	0.351351	0505A	24	JBBB003D_scaffold_56	13
1	1	0505A	0	JBBB003D_scaffold_58	1
97753	0.166667	0505A	45	JBBB003D_scaffold_56	9
143375	0.125	0505A	7	JBBB003D_scaffold_29	1
1044	0.3	0505A	7	JBBB003D_scaffold_92	3
1423	NA	0505A	0	JBBB003D_scaffold_756	0
2294	0.5	0505A	16	JBBB003D_scaffold_1345	16
18653	0.2	0505A	16	JBBB003D_scaffold_183	4
3821	1	0505A	0	JBBB003D_scaffold_529	8
2911	0.176471	0505A	28	JBBB003D_scaffold_1345	6
30804	0.151515	0505A	28	JBBB003D_scaffold_12	5
18474	0.440476	0505A	47	JBBB003D_scaffold_183	37
37356	0.0294118	0505A	33	JBBB003D_scaffold_58	1
31578	0.24	0505A	38	JBBB003D_scaffold_170	12
44399	0.178571	0505A	46	JBBB003D_scaffold_92	10
31182	0.0666667	0505A	42	JBBB003D_scaffold_12	3
250990	0	0505A	37	JBBB003D_scaffold_2	0
3	NA	0505A	0	JBBB003D_scaffold_529	0
95509	0.428571	0505A	4	JBBB003D_scaffold_41	3
173532	0.238095	0505A	16	JBBB003D_scaffold_21	5
14527	0.5	0505A	15	JBBB003D_scaffold_223	15
12459	0	0505A	13	JBBB003D_scaffold_170	0
2	0.833333	0505A	2	JBBB003D_scaffold_128	10
1056	0.230769	0505A	10	JBBB003D_scaffold_92	3
845	0	0505A	89	JBBB003D_scaffold_1304	0
302	0.229508	0505A	47	JBBB003D_scaffold_12	14
2734	0.666667	0505A	1	JBBB003D_scaffold_1304	2
1836	0.6	0505A	16	JBBB003D_scaffold_1304	24
30870	0.0434783	0505A	22	JBBB003D_scaffold_12	1
3033	0.170732	0505A	34	JBBB003D_scaffold_170	7
12320	0.222222	0505A	7	JBBB003D_scaffold_223	2
14540	0.15	0505A	17	JBBB003D_scaffold_223	3
2413	0	0505A	77	JBBB003D_scaffold_1304	0
7989	NA	0505A	0	JBBB003D_scaffold_756	0
31571	0.25	0505A	36	JBBB003D_scaffold_170	12
188	0	0505A	99	JBBB003D_scaffold_179	0
5999	0	0505A	95	JBBB003D_scaffold_1304	0
37614	0.0769231	0505A	48	JBBB003D_scaffold_58	4
36799	0.719243	0505A	89	JBBB003D_scaffold_260	228
28275	0	0505A	3	JBBB003D_scaffold_172	0
28437	0.282353	0505A	61	JBBB003D_scaffold_128	24
138260	0.87013	0505A	10	JBBB003D_scaffold_53	67
2310	0	0505A	65	JBBB003D_scaffold_1304	0
4140	NA	0505A	0	JBBB003D_scaffold_766	0
1	0.333333	0505A	2	JBBB003D_scaffold_173	1
31564	0.222222	0505A	35	JBBB003D_scaffold_170	10
3918	0	0505A	70	JBBB003D_scaffold_1345	0
31590	0.226415	0505A	41	JBBB003D_scaffold_170	12
1837	0.625	0505A	15	JBBB003D_scaffold_1304	25
3826	0.137931	0505A	25	JBBB003D_scaffold_179	4
97941	0.25	0505A	18	JBBB003D_scaffold_56	6
3	0.25	0505A	3	JBBB003D_scaffold_223	1
129760	0.78	0505A	11	JBBB003D_scaffold_29	39
37496	0.047619	0505A	40	JBBB003D_scaffold_58	2
1	0	0505A	2	JBBB003D_scaffold_127	0
3439	0.261905	0505A	31	JBBB003D_scaffold_1304	11
4987	0	0505A	86	JBBB003D_scaffold_1345	0
31185	0.0652174	0505A	43	JBBB003D_scaffold_12	3
1041	0.666667	0505A	4	JBBB003D_scaffold_92	8
3846	NA	0505A	0	JBBB003D_scaffold_529	0
1	1	0505A	0	JBBB003D_scaffold_60	1
3067	0.19697	0505A	53	JBBB003D_scaffold_260	13
579739	0.333333	0505A	6	JBBB003D_scaffold_4	3
1	1	0505A	0	JBBB003D_scaffold_12	1
1826	0.142857	0505A	36	JBBB003D_scaffold_1304	6
2909	0.242424	0505A	25	JBBB003D_scaffold_1345	8
12447	0.222222	0505A	14	JBBB003D_scaffold_154	4
278637	0.0571429	0505A	33	JBBB003D_scaffold_2	2
2910	0	0505A	66	JBBB003D_scaffold_179	0
6636	NA	0505A	0	JBBB003D_scaffold_529	0
6645	NA	0505A	0	JBBB003D_scaffold_529	0
4	0.727273	0505A	3	JBBB003D_scaffold_58	8
114523	0.0606061	0505A	31	JBBB003D_scaffold_29	2
173516	0.222222	0505A	21	JBBB003D_scaffold_21	6
3656	1	0505A	0	JBBB003D_scaffold_529	48
12324	0.545455	0505A	5	JBBB003D_scaffold_223	6
30822	0.0740741	0505A	25	JBBB003D_scaffold_12	2
154469	0.324324	0505A	25	JBBB003D_scaffold_53	12
4	0.903226	0505A	3	JBBB003D_scaffold_152	28
3823	0.519231	0505A	25	JBBB003D_scaffold_179	27
31558	0.148936	0505A	40	JBBB003D_scaffold_170	7
12556	0.450704	0505A	39	JBBB003D_scaffold_260	32
68753	0.666667	0505A	41	JBBB003D_scaffold_2	82
6332	0	0505A	6	JBBB003D_scaffold_1345	0
1060	0.1	0505A	9	JBBB003D_scaffold_92	1
2546	0.152542	0505A	50	JBBB003D_scaffold_170	9
31143	0.0731707	0505A	38	JBBB003D_scaffold_12	3
251686	0.0222222	0505A	44	JBBB003D_scaffold_2	1
3	0.625	0505A	6	JBBB003D_scaffold_222	10
44484	0.295918	0505A	69	JBBB003D_scaffold_92	29
3648	1	0505A	0	JBBB003D_scaffold_529	47
94212	0.484848	0505A	34	JBBB003D_scaffold_58	32
97922	0.421875	0505A	37	JBBB003D_scaffold_56	27
22760	1	0505A	0	JBBB003D_scaffold_179	9
1393	0.4	0505A	3	JBBB003D_scaffold_1872	2
24817	0.111111	0505A	16	JBBB003D_scaffold_58	2
1245	0	0505A	82	JBBB003D_scaffold_1304	0
2479	0.123288	0505A	64	JBBB003D_scaffold_170	9
1	0.4	0505A	3	JBBB003D_scaffold_1345	2
4144	NA	0505A	0	JBBB003D_scaffold_766	0
360757	0	0505A	4	JBBB003D_scaffold_2	0
114898	0.025	0505A	39	JBBB003D_scaffold_29	1
826	0.525	0505A	38	JBBB003D_scaffold_173	42
94320	0.263158	0505A	14	JBBB003D_scaffold_58	5
154486	0.408163	0505A	29	JBBB003D_scaffold_53	20
32050	0.5	0505A	1	JBBB003D_scaffold_170	1
110	0.243243	0505A	28	JBBB003D_scaffold_25	9
6600	NA	0505A	0	JBBB003D_scaffold_529	0
119701	0.2	0505A	4	JBBB003D_scaffold_56	1
1	0.428571	0505A	4	JBBB003D_scaffold_179	3
2	0.333333	0505A	2	JBBB003D_scaffold_173	1
218076	0.0961538	0505A	47	JBBB003D_scaffold_21	5
4122	NA	0505A	0	JBBB003D_scaffold_766	0
17611	0	0505A	17	JBBB003D_scaffold_29	0
309295	0.340909	0505A	29	JBBB003D_scaffold_2	15
110	0	0505A	69	JBBB003D_scaffold_1304	0
115676	0.025	0505A	39	JBBB003D_scaffold_4	1
1391	0.333333	0505A	4	JBBB003D_scaffold_1872	2
7996	NA	0505A	0	JBBB003D_scaffold_756	0
3	0.6	0505A	2	JBBB003D_scaffold_172	3
2011	0	0505A	88	JBBB003D_scaffold_1304	0
97788	0.383333	0505A	37	JBBB003D_scaffold_56	23
95355	0.260274	0505A	54	JBBB003D_scaffold_41	19
579740	0.222222	0505A	7	JBBB003D_scaffold_4	2
2	0.944444	0505A	1	JBBB003D_scaffold_101	17
3127	0.264706	0505A	50	JBBB003D_scaffold_170	18
44624	0.5	0505A	20	JBBB003D_scaffold_92	20
3180	0.236364	0505A	42	JBBB003D_scaffold_103	13
611	0	0505A	94	JBBB003D_scaffold_1304	0
33212	0.285714	0505A	5	JBBB003D_scaffold_154	2
44727	0.518987	0505A	38	JBBB003D_scaffold_92	41
36832	0.829317	0505A	85	JBBB003D_scaffold_260	413
12322	0.181818	0505A	9	JBBB003D_scaffold_223	2
68720	0.394366	0505A	86	JBBB003D_scaffold_2	56
97921	0.351351	0505A	24	JBBB003D_scaffold_56	13
4	0.857143	0505A	2	JBBB003D_scaffold_173	12
1885	0.3125	0505A	33	JBBB003D_scaffold_260	15
3850	0	0505A	73	JBBB003D_scaffold_1345	0
86655	0.425926	0505A	31	JBBB003D_scaffold_41	23
26745	0.315789	0505A	13	JBBB003D_scaffold_56	6
32049	0.2	0505A	4	JBBB003D_scaffold_170	1
309283	0.440678	0505A	33	JBBB003D_scaffold_2	26
110385	0.717949	0505A	11	JBBB003D_scaffold_58	28
119953	0.25	0505A	6	JBBB003D_scaffold_25	2
3462	0.222222	0505A	21	JBBB003D_scaffold_1304	6
403009	0.333333	0505A	12	JBBB003D_scaffold_4	6
1431	NA	0505A	0	JBBB003D_scaffold_756	0
44485	0.292929	0505A	70	JBBB003D_scaffold_92	29
218058	0.481481	0505A	28	JBBB003D_scaffold_21	26
154692	0.571429	0505A	3	JBBB003D_scaffold_53	4
4	0.789474	0505A	4	JBBB003D_scaffold_223	15
2814	0	0505A	76	JBBB003D_scaffold_1345	0
37500	0.0465116	0505A	41	JBBB003D_scaffold_58	2
1	0.5	0505A	1	JBBB003D_scaffold_152	1
68609	0.1	0505A	54	JBBB003D_scaffold_2	6
75212	0.384615	0505A	8	JBBB003D_scaffold_53	5
14081	0.75	0505A	1	JBBB003D_scaffold_389	3
1	0.333333	0505A	4	JBBB003D_scaffold_2	2
208	0	0505A	68	JBBB003D_scaffold_1345	0
4	0.461538	0505A	7	JBBB003D_scaffold_101	6
251368	0	0505A	41	JBBB003D_scaffold_2	0
2282	0.235294	0505A	13	JBBB003D_scaffold_1345	4
279190	0.0416667	0505A	46	JBBB003D_scaffold_2	2
307	0.237288	0505A	45	JBBB003D_scaffold_12	14
173521	0.375	0505A	15	JBBB003D_scaffold_21	9
28502	0.234375	0505A	49	JBBB003D_scaffold_128	15
2295	0.564103	0505A	17	JBBB003D_scaffold_1345	22
26749	0.3125	0505A	11	JBBB003D_scaffold_56	5
14535	0.190476	0505A	17	JBBB003D_scaffold_223	4
37192	0.0465116	0505A	41	JBBB003D_scaffold_58	2
890	0.770833	0505A	33	JBBB003D_scaffold_173	111
1277	0	0505A	81	JBBB003D_scaffold_1304	0
1204	0	0505A	57	JBBB003D_scaffold_1304	0
29301	0.625	0505A	15	JBBB003D_scaffold_127	25
68701	0.669065	0505A	46	JBBB003D_scaffold_2	93
2386	0.25	0505A	3	JBBB003D_scaffold_1312	1
9017	0.761905	0505A	5	JBBB003D_scaffold_389	16
22758	0.615385	0505A	5	JBBB003D_scaffold_179	8
9022	0.571429	0505A	3	JBBB003D_scaffold_389	4
127790	0.481481	0505A	14	JBBB003D_scaffold_21	13
360758	0.833333	0505A	1	JBBB003D_scaffold_2	5
3489	0.714286	0505A	2	JBBB003D_scaffold_529	5
173514	0.315789	0505A	13	JBBB003D_scaffold_21	6
2596	0.0961538	0505A	47	JBBB003D_scaffold_170	5
95411	0.333333	0505A	50	JBBB003D_scaffold_41	25
12325	0.421053	0505A	11	JBBB003D_scaffold_223	8
12433	0.0909091	0505A	10	JBBB003D_scaffold_154	1
3231	1	0505A	0	JBBB003D_scaffold_1304	16
12531	0.263158	0505A	56	JBBB003D_scaffold_260	20
15550	0	0505A	1	JBBB003D_scaffold_222	0
2	0.5	0505A	1	JBBB003D_scaffold_92	1
143377	0.571429	0505A	3	JBBB003D_scaffold_29	4
212	0	0505A	68	JBBB003D_scaffold_1345	0
114793	0.0681818	0505A	41	JBBB003D_scaffold_29	3
421	0.289855	0505A	49	JBBB003D_scaffold_12	20
3839	0	0505A	84	JBBB003D_scaffold_1304	0
17272	0.243902	0505A	62	JBBB003D_scaffold_41	20
12431	0.380952	0505A	13	JBBB003D_scaffold_154	8
251480	0.0454545	0505A	42	JBBB003D_scaffold_2	2
4	0.9	0505A	3	JBBB003D_scaffold_172	27
2473	0.260274	0505A	54	JBBB003D_scaffold_170	19
1852	0.229167	0505A	37	JBBB003D_scaffold_260	11
17255	0.281553	0505A	74	JBBB003D_scaffold_41	29
4531	0	0505A	52	JBBB003D_scaffold_1304	0
44612	0.384615	0505A	24	JBBB003D_scaffold_92	15
24798	0.416667	0505A	7	JBBB003D_scaffold_58	5
5442	0	0505A	74	JBBB003D_scaffold_1304	0
2533	0.121212	0505A	58	JBBB003D_scaffold_170	8
3232	0.88	0505A	3	JBBB003D_scaffold_1304	22
132	0	0505A	82	JBBB003D_scaffold_1304	0
29304	0.714286	0505A	2	JBBB003D_scaffold_127	5
114964	0	0505A	47	JBBB003D_scaffold_29	0
4131	NA	0505A	0	JBBB003D_scaffold_766	0
251031	0	0505A	38	JBBB003D_scaffold_2	0
111403	0.559524	0505A	37	JBBB003D_scaffold_60	47
12430	0.352941	0505A	11	JBBB003D_scaffold_154	6
218059	0.490566	0505A	27	JBBB003D_scaffold_21	26
3084	0.2	0505A	52	JBBB003D_scaffold_260	13
5656	0.171429	0505A	29	JBBB003D_scaffold_1304	6
231383	1	0505A	0	JBBB003D_scaffold_2	40
3939	0	0505A	71	JBBB003D_scaffold_1345	0
279544	0	0505A	38	JBBB003D_scaffold_2	0
442	0.35443	0505A	51	JBBB003D_scaffold_12	28
2281	0.222222	0505A	14	JBBB003D_scaffold_1345	4
119699	0	0505A	4	JBBB003D_scaffold_56	0
114895	0.0512821	0505A	37	JBBB003D_scaffold_29	2
8000	NA	0505A	0	JBBB003D_scaffold_756	0
44722	0.25974	0505A	57	JBBB003D_scaffold_92	20
44631	0.333333	0505A	26	JBBB003D_scaffold_92	13
739	0.259259	0505A	20	JBBB003D_scaffold_12	7
3849	NA	0505A	0	JBBB003D_scaffold_529	0
28460	0.347222	0505A	47	JBBB003D_scaffold_128	25
176474	0.176471	0505A	14	JBBB003D_scaffold_21	3
3487	0.6	0505A	2	JBBB003D_scaffold_529	3
26740	0.55	0505A	9	JBBB003D_scaffold_56	11
999	0.25	0505A	6	JBBB003D_scaffold_170	2
38785	0.384615	0505A	16	JBBB003D_scaffold_4	10
111507	0	0505A	5	JBBB003D_scaffold_60	0
1	0	0505A	2	JBBB003D_scaffold_4	0
5788	0	0505A	101	JBBB003D_scaffold_1304	0
1030	0.285714	0505A	5	JBBB003D_scaffold_92	2
154491	0.416667	0505A	28	JBBB003D_scaffold_53	20
63294	0.307692	0505A	36	JBBB003D_scaffold_41	16
251469	0.0487805	0505A	39	JBBB003D_scaffold_2	2
8006	NA	0505A	0	JBBB003D_scaffold_756	0
2022	0	0505A	84	JBBB003D_scaffold_1304	0
4127	NA	0505A	0	JBBB003D_scaffold_766	0
4148	NA	0505A	0	JBBB003D_scaffold_766	0
3	0	0505A	1	JBBB003D_scaffold_60	0
174181	0.580645	0505A	13	JBBB003D_scaffold_58	18
3500	0	0505A	43	JBBB003D_scaffold_1304	0
3438	NA	0505A	0	JBBB003D_scaffold_997	0
5806	0	0505A	101	JBBB003D_scaffold_1304	0
24812	0	0505A	15	JBBB003D_scaffold_58	0
17085	0.666667	0505A	2	JBBB003D_scaffold_200	4
239506	0.733333	0505A	4	JBBB003D_scaffold_58	11
154688	0.730769	0505A	14	JBBB003D_scaffold_53	38
19520	NA	0505A	0	JBBB003D_scaffold_173	0
38794	0.1	0505A	18	JBBB003D_scaffold_4	2
63343	0.272727	0505A	40	JBBB003D_scaffold_41	15
37162	0.5	0505A	2	JBBB003D_scaffold_260	2
3220	1	0505A	0	JBBB003D_scaffold_1304	11
12435	0.5	0505A	9	JBBB003D_scaffold_154	9
5647	0.352941	0505A	22	JBBB003D_scaffold_1304	12
3172	0.355556	0505A	29	JBBB003D_scaffold_170	16
114979	0.0204082	0505A	48	JBBB003D_scaffold_29	1
487192	0.0666667	0505A	14	JBBB003D_scaffold_4	1
2215	NA	0505A	0	JBBB003D_scaffold_756	0
115348	0.0285714	0505A	34	JBBB003D_scaffold_4	1
1	0.714286	0505A	2	JBBB003D_scaffold_1328	5
33917	0.25	0505A	3	JBBB003D_scaffold_116	1
18661	0.25	0505A	9	JBBB003D_scaffold_183	3
1969	0.25	0505A	39	JBBB003D_scaffold_260	13
6739	NA	0505A	0	JBBB003D_scaffold_529	0
2	0.125	0505A	7	JBBB003D_scaffold_1304	1
129755	0.388889	0505A	11	JBBB003D_scaffold_29	7
996	0.571429	0505A	9	JBBB003D_scaffold_170	12
280	0	0505A	82	JBBB003D_scaffold_1345	0
31566	0.229167	0505A	37	JBBB003D_scaffold_170	11
1921	0	0505A	69	JBBB003D_scaffold_1304	0
94326	0.176471	0505A	14	JBBB003D_scaffold_58	3
66420	0.5	0505A	1	JBBB003D_scaffold_92	1
94310	0.295455	0505A	31	JBBB003D_scaffold_58	13
2405	0	0505A	78	JBBB003D_scaffold_179	0
97940	0.28	0505A	18	JBBB003D_scaffold_56	7
173524	0.36	0505A	16	JBBB003D_scaffold_21	9
114887	0.025641	0505A	38	JBBB003D_scaffold_29	1
5320	0	0505A	80	JBBB003D_scaffold_1345	0
2	0.4	0505A	3	JBBB003D_scaffold_154	2
115657	0.03125	0505A	31	JBBB003D_scaffold_4	1
2344	0.333333	0505A	2	JBBB003D_scaffold_1328	1
154477	0.288462	0505A	37	JBBB003D_scaffold_53	15
6004	0	0505A	98	JBBB003D_scaffold_1304	0
3790	1	0505A	0	JBBB003D_scaffold_529	23
1	0.333333	0505A	2	JBBB003D_scaffold_183	1
1142	0.166667	0505A	30	JBBB003D_scaffold_1304	6
6151	0	0505A	72	JBBB003D_scaffold_1345	0
38372	0.592593	0505A	11	JBBB003D_scaffold_103	16
2585	0.166667	0505A	45	JBBB003D_scaffold_170	9
63307	0.275862	0505A	42	JBBB003D_scaffold_41	16
44479	0.3125	0505A	66	JBBB003D_scaffold_92	30
97930	0.272727	0505A	24	JBBB003D_scaffold_56	9
218135	0.121951	0505A	36	JBBB003D_scaffold_21	5
3701	0.0277778	0505A	35	JBBB003D_scaffold_389	1
24350	0.4	0505A	9	JBBB003D_scaffold_260	6
1266	0	0505A	86	JBBB003D_scaffold_1304	0
3	NA	0505A	0	JBBB003D_scaffold_1365	0
24813	0	0505A	14	JBBB003D_scaffold_58	0
44451	0.54878	0505A	37	JBBB003D_scaffold_92	45
3241	0.769231	0505A	3	JBBB003D_scaffold_1304	10
4147	NA	0505A	0	JBBB003D_scaffold_766	0
119951	0.166667	0505A	5	JBBB003D_scaffold_25	1
154689	0.5	0505A	7	JBBB003D_scaffold_53	7
97929	0.30303	0505A	23	JBBB003D_scaffold_56	10
3081	0.416667	0505A	28	JBBB003D_scaffold_170	20
102	0	0505A	57	JBBB003D_scaffold_1345	0
38769	0.444444	0505A	10	JBBB003D_scaffold_4	8
6618	NA	0505A	0	JBBB003D_scaffold_529	0
12533	0.254237	0505A	44	JBBB003D_scaffold_260	15
43159	0.3125	0505A	11	JBBB003D_scaffold_60	5
7992	NA	0505A	0	JBBB003D_scaffold_756	0
30769	0.153846	0505A	33	JBBB003D_scaffold_12	6
251492	0.0425532	0505A	45	JBBB003D_scaffold_2	2
100	0	0505A	62	JBBB003D_scaffold_1304	0
2757	0	0505A	85	JBBB003D_scaffold_179	0
111394	0.546512	0505A	39	JBBB003D_scaffold_60	47
3766	1	0505A	0	JBBB003D_scaffold_529	32
21703	0.333333	0505A	4	JBBB003D_scaffold_152	2
3032	0.142857	0505A	36	JBBB003D_scaffold_170	6
3	0.727273	0505A	3	JBBB003D_scaffold_1872	8
44626	0.222222	0505A	21	JBBB003D_scaffold_92	6
6112	0	0505A	76	JBBB003D_scaffold_1304	0
18435	0.35	0505A	52	JBBB003D_scaffold_183	28
38375	0.625	0505A	3	JBBB003D_scaffold_103	5
68852	0.227273	0505A	17	JBBB003D_scaffold_2	5
745	0.357143	0505A	18	JBBB003D_scaffold_12	10
278	0	0505A	86	JBBB003D_scaffold_179	0
360756	0.5	0505A	2	JBBB003D_scaffold_2	2
1263	0	0505A	84	JBBB003D_scaffold_1304	0
111400	0.547619	0505A	38	JBBB003D_scaffold_60	46
6621	NA	0505A	0	JBBB003D_scaffold_529	0
32047	0.6	0505A	2	JBBB003D_scaffold_170	3
30942	0.09375	0505A	29	JBBB003D_scaffold_12	3
30782	0.153846	0505A	33	JBBB003D_scaffold_12	6
1861	0.234043	0505A	36	JBBB003D_scaffold_260	11
15547	0	0505A	2	JBBB003D_scaffold_222	0
44496	0.362745	0505A	65	JBBB003D_scaffold_92	37
114589	0.0882353	0505A	31	JBBB003D_scaffold_29	3
886	0	0505A	94	JBBB003D_scaffold_1304	0
579733	0.444444	0505A	5	JBBB003D_scaffold_4	4
115672	0.0526316	0505A	36	JBBB003D_scaffold_4	2
2	0.5	0505A	4	JBBB003D_scaffold_25	4
43164	0.25	0505A	12	JBBB003D_scaffold_60	4
38773	0.473684	0505A	10	JBBB003D_scaffold_4	9
251251	0	0505A	44	JBBB003D_scaffold_2	0
26732	0.357143	0505A	18	JBBB003D_scaffold_56	10
36835	0.828629	0505A	85	JBBB003D_scaffold_260	411
4408	0.16129	0505A	26	JBBB003D_scaffold_1345	5
14526	0.481481	0505A	14	JBBB003D_scaffold_223	13
24340	0.391304	0505A	14	JBBB003D_scaffold_260	9
14545	0.111111	0505A	24	JBBB003D_scaffold_223	3
3845	1	0505A	0	JBBB003D_scaffold_529	1
251378	0.0263158	0505A	37	JBBB003D_scaffold_2	1
3836	1	0505A	0	JBBB003D_scaffold_529	4
3450	0.666667	0505A	11	JBBB003D_scaffold_1304	22
22887	0.2	0505A	12	JBBB003D_scaffold_56	3
111347	0.421053	0505A	44	JBBB003D_scaffold_60	32
2	1	0505A	0	JBBB003D_scaffold_60	7
123	0	0505A	77	JBBB003D_scaffold_1304	0
138262	0.0666667	0505A	14	JBBB003D_scaffold_53	1
2	0.666667	0505A	3	JBBB003D_scaffold_77	6
97939	0.357143	0505A	18	JBBB003D_scaffold_56	10
828	0.604167	0505A	38	JBBB003D_scaffold_173	58
37572	0.0588235	0505A	48	JBBB003D_scaffold_58	3
114401	0.0322581	0505A	30	JBBB003D_scaffold_29	1
29302	0	0505A	9	JBBB003D_scaffold_127	0
9016	0.473684	0505A	20	JBBB003D_scaffold_389	18
44760	0.404494	0505A	53	JBBB003D_scaffold_92	36
3414	NA	0505A	0	JBBB003D_scaffold_997	0
24808	0.133333	0505A	13	JBBB003D_scaffold_58	2
908	0	0505A	96	JBBB003D_scaffold_1304	0
111383	0.488889	0505A	46	JBBB003D_scaffold_60	44
21221	NA	0505A	0	JBBB003D_scaffold_389	0
30831	0.0740741	0505A	25	JBBB003D_scaffold_12	2
29305	0.571429	0505A	3	JBBB003D_scaffold_127	4
3	1	0505A	0	JBBB003D_scaffold_4	2
176470	0.0952381	0505A	19	JBBB003D_scaffold_21	2
403013	0.25	0505A	9	JBBB003D_scaffold_4	3
115378	0.0294118	0505A	33	JBBB003D_scaffold_4	1
4877	0	0505A	92	JBBB003D_scaffold_1345	0
95510	0.666667	0505A	1	JBBB003D_scaffold_41	2
68608	0.0983607	0505A	55	JBBB003D_scaffold_2	6
68868	0.0666667	0505A	14	JBBB003D_scaffold_2	1
36638	0.447368	0505A	21	JBBB003D_scaffold_260	17
2394	0	0505A	77	JBBB003D_scaffold_1304	0
6043	0	0505A	74	JBBB003D_scaffold_1345	0
119952	0.428571	0505A	4	JBBB003D_scaffold_25	3
3076	0.203125	0505A	51	JBBB003D_scaffold_260	13
218020	0.408163	0505A	29	JBBB003D_scaffold_21	20
251755	0.0408163	0505A	47	JBBB003D_scaffold_2	2
114886	0.025	0505A	39	JBBB003D_scaffold_29	1
41778	0	0505A	3	JBBB003D_scaffold_128	0
3598	1	0505A	0	JBBB003D_scaffold_529	32
3486	0.5	0505A	2	JBBB003D_scaffold_529	2
68641	0.188235	0505A	69	JBBB003D_scaffold_2	16
37343	0.030303	0505A	32	JBBB003D_scaffold_58	1
119948	0.230769	0505A	10	JBBB003D_scaffold_25	3
2539	0.0967742	0505A	56	JBBB003D_scaffold_170	6
37342	0.030303	0505A	32	JBBB003D_scaffold_58	1
3291	NA	0505A	0	JBBB003D_scaffold_756	0
218016	0.36	0505A	32	JBBB003D_scaffold_21	18
2318	0.5	0505A	3	JBBB003D_scaffold_1333	3
1050	0.25	0505A	9	JBBB003D_scaffold_92	3
17084	0.708333	0505A	7	JBBB003D_scaffold_200	17
110389	0.294118	0505A	12	JBBB003D_scaffold_58	5
24352	0.4	0505A	9	JBBB003D_scaffold_260	6
3824	0	0505A	77	JBBB003D_scaffold_1345	0
14534	0.181818	0505A	18	JBBB003D_scaffold_223	4
14539	0.142857	0505A	24	JBBB003D_scaffold_223	4
19516	0.857143	0505A	1	JBBB003D_scaffold_173	6
17060	0.222222	0505A	14	JBBB003D_scaffold_29	4
12461	0.0769231	0505A	12	JBBB003D_scaffold_170	1
36637	0.472222	0505A	19	JBBB003D_scaffold_260	17
17046	0.354839	0505A	20	JBBB003D_scaffold_29	11
6623	NA	0505A	0	JBBB003D_scaffold_529	0
39319	NA	0505A	0	JBBB003D_scaffold_101	0
681	0	0505A	83	JBBB003D_scaffold_1304	0
86775	0.294118	0505A	12	JBBB003D_scaffold_41	5
3285	0	0505A	81	JBBB003D_scaffold_179	0
24345	0.375	0505A	15	JBBB003D_scaffold_260	9
595	0.483516	0505A	47	JBBB003D_scaffold_12	44
68853	0.173913	0505A	19	JBBB003D_scaffold_2	4
12893	0.134615	0505A	45	JBBB003D_scaffold_260	7
4	0.538462	0505A	6	JBBB003D_scaffold_1328	7
2286	0.217391	0505A	18	JBBB003D_scaffold_1345	5
31111	0.0769231	0505A	36	JBBB003D_scaffold_12	3
239508	0.285714	0505A	5	JBBB003D_scaffold_58	2
2216	NA	0505A	0	JBBB003D_scaffold_756	0
5791	0	0505A	101	JBBB003D_scaffold_1304	0
279524	0.0243902	0505A	40	JBBB003D_scaffold_2	1
3	0	0505A	3	JBBB003D_scaffold_56	0
3091	0.387755	0505A	30	JBBB003D_scaffold_170	19
579611	0.272727	0505A	32	JBBB003D_scaffold_4	12
176461	0.394737	0505A	23	JBBB003D_scaffold_21	15
3690	0.0294118	0505A	33	JBBB003D_scaffold_389	1
38377	0.142857	0505A	6	JBBB003D_scaffold_103	1
14523	0.228571	0505A	27	JBBB003D_scaffold_223	8
2534	0.121212	0505A	58	JBBB003D_scaffold_170	8
372	0	0505A	91	JBBB003D_scaffold_1345	0
2918	0.4375	0505A	18	JBBB003D_scaffold_1345	14
111384	0.511111	0505A	44	JBBB003D_scaffold_60	46
2	0.823529	0505A	3	JBBB003D_scaffold_1872	14
28457	0.352113	0505A	46	JBBB003D_scaffold_128	25
33209	0.375	0505A	10	JBBB003D_scaffold_154	6
97925	0.217391	0505A	36	JBBB003D_scaffold_56	10
2	0.875	0505A	2	JBBB003D_scaffold_56	14
97919	0.324324	0505A	25	JBBB003D_scaffold_56	12
3	0.666667	0505A	2	JBBB003D_scaffold_200	4
2488	0.147059	0505A	58	JBBB003D_scaffold_170	10
251800	0	0505A	43	JBBB003D_scaffold_2	0
1	0.5	0505A	1	JBBB003D_scaffold_154	1
652	0	0505A	83	JBBB003D_scaffold_1304	0
5833	0	0505A	103	JBBB003D_scaffold_1304	0
4407	0.721154	0505A	29	JBBB003D_scaffold_1345	75
5626	0	0505A	77	JBBB003D_scaffold_1345	0
3	0.666667	0505A	5	JBBB003D_scaffold_77	10
95339	0.5	0505A	31	JBBB003D_scaffold_41	31
28456	0.352113	0505A	46	JBBB003D_scaffold_128	25
5314	0	0505A	80	JBBB003D_scaffold_1345	0
4134	NA	0505A	0	JBBB003D_scaffold_766	0
127785	0.2	0505A	12	JBBB003D_scaffold_21	3
154487	0.408163	0505A	29	JBBB003D_scaffold_53	20
6744	NA	0505A	0	JBBB003D_scaffold_529	0
86778	0.266667	0505A	11	JBBB003D_scaffold_41	4
278707	0.0444444	0505A	43	JBBB003D_scaffold_2	2
331	0.267857	0505A	41	JBBB003D_scaffold_12	15
3125	0.333333	0505A	34	JBBB003D_scaffold_170	17
30699	0.125	0505A	35	JBBB003D_scaffold_12	5
891	0	0505A	95	JBBB003D_scaffold_1304	0
37657	0.0227273	0505A	43	JBBB003D_scaffold_58	1
38378	0.666667	0505A	1	JBBB003D_scaffold_103	2
37410	0	0505A	36	JBBB003D_scaffold_58	0
6142	0	0505A	83	JBBB003D_scaffold_1304	0
1	0.4	0505A	3	JBBB003D_scaffold_25	2
3647	0.0714286	0505A	26	JBBB003D_scaffold_389	2
44376	0.189189	0505A	30	JBBB003D_scaffold_92	7
44763	0.406593	0505A	54	JBBB003D_scaffold_92	37
3229	1	0505A	0	JBBB003D_scaffold_1304	16
38790	0.235294	0505A	13	JBBB003D_scaffold_4	4
33920	1	0505A	0	JBBB003D_scaffold_116	3
3470	1	0505A	0	JBBB003D_scaffold_529	1
36834	0.830303	0505A	84	JBBB003D_scaffold_260	411
37161	0.25	0505A	6	JBBB003D_scaffold_260	2
578	0	0505A	84	JBBB003D_scaffold_1304	0
97927	0.277778	0505A	26	JBBB003D_scaffold_56	10
26742	0.388889	0505A	11	JBBB003D_scaffold_56	7
5947	0	0505A	83	JBBB003D_scaffold_1345	0
44443	0.55	0505A	36	JBBB003D_scaffold_92	44
3161	0.377778	0505A	28	JBBB003D_scaffold_170	17
19174	0	0505A	3	JBBB003D_scaffold_183	0
4	1	0505A	0	JBBB003D_scaffold_1333	18
75207	0.157895	0505A	16	JBBB003D_scaffold_53	3
5842	0	0505A	99	JBBB003D_scaffold_1304	0
278602	0.0333333	0505A	29	JBBB003D_scaffold_2	1
1000	0.857143	0505A	5	JBBB003D_scaffold_170	30
111367	0.470588	0505A	45	JBBB003D_scaffold_60	40
12867	0.145833	0505A	41	JBBB003D_scaffold_260	7
14547	0.136364	0505A	19	JBBB003D_scaffold_223	3
2610	0	0505A	72	JBBB003D_scaffold_1304	0
3	0.92	0505A	2	JBBB003D_scaffold_103	23
2930	0.08	0505A	46	JBBB003D_scaffold_103	4
95444	0.352941	0505A	44	JBBB003D_scaffold_41	24
1	0.5	0505A	1	JBBB003D_scaffold_77	1
11069	NA	0505A	0	JBBB003D_scaffold_756	0
3124	0.326923	0505A	35	JBBB003D_scaffold_170	17
583	0.494737	0505A	48	JBBB003D_scaffold_12	47
24342	0.454545	0505A	12	JBBB003D_scaffold_260	10
402961	0.1875	0505A	26	JBBB003D_scaffold_4	6
668	0	0505A	79	JBBB003D_scaffold_1304	0
1	0	0505A	1	JBBB003D_scaffold_128	0
114976	0.04	0505A	48	JBBB003D_scaffold_29	2
1734	0	0505A	83	JBBB003D_scaffold_1304	0
3772	1	0505A	0	JBBB003D_scaffold_529	31
1422	NA	0505A	0	JBBB003D_scaffold_756	0
114745	0.0222222	0505A	44	JBBB003D_scaffold_29	1
29870	0.4	0505A	3	JBBB003D_scaffold_223	2
21219	NA	0505A	0	JBBB003D_scaffold_389	0
5935	0	0505A	74	JBBB003D_scaffold_1345	0
19173	0	0505A	1	JBBB003D_scaffold_183	0
4123	NA	0505A	0	JBBB003D_scaffold_766	0
19517	0	0505A	3	JBBB003D_scaffold_173	0
2388	0	0505A	1	JBBB003D_scaffold_1312	0
3244	0.754098	0505A	15	JBBB003D_scaffold_1304	46
18658	0.2	0505A	12	JBBB003D_scaffold_183	3
2910	0.365385	0505A	33	JBBB003D_scaffold_1345	19
43169	0.352941	0505A	11	JBBB003D_scaffold_60	6
44435	0.526316	0505A	36	JBBB003D_scaffold_92	40
2	0.5	0505A	3	JBBB003D_scaffold_1328	3
75211	0	0505A	12	JBBB003D_scaffold_53	0
37473	0	0505A	37	JBBB003D_scaffold_58	0
3	0	0505A	2	JBBB003D_scaffold_21	0
4269	0	0505A	78	JBBB003D_scaffold_1304	0
3237	0.363636	0505A	21	JBBB003D_scaffold_1304	12
229	0.0144928	0505A	68	JBBB003D_scaffold_1345	1
19175	0.333333	0505A	2	JBBB003D_scaffold_183	1
3	0.8	0505A	6	JBBB003D_scaffold_41	24
278320	0	0505A	56	JBBB003D_scaffold_2	0
1246	0	0505A	83	JBBB003D_scaffold_1304	0
31592	0.226415	0505A	41	JBBB003D_scaffold_170	12
174179	0.2	0505A	12	JBBB003D_scaffold_58	3
4008	NA	0505A	0	JBBB003D_scaffold_766	0
280	0.156863	0505A	43	JBBB003D_scaffold_12	8
11546	0	0505A	46	JBBB003D_scaffold_58	0
5802	0	0505A	103	JBBB003D_scaffold_1304	0
743	0.404762	0505A	25	JBBB003D_scaffold_12	17
3	0.333333	0505A	4	JBBB003D_scaffold_53	2
129766	0.3125	0505A	11	JBBB003D_scaffold_29	5
579637	0.297297	0505A	26	JBBB003D_scaffold_4	11
6223	0	0505A	81	JBBB003D_scaffold_1304	0
3	0.833333	0505A	2	JBBB003D_scaffold_116	10
2	0.4	0505A	6	JBBB003D_scaffold_1312	4
251365	0	0505A	41	JBBB003D_scaffold_2	0
590268	0.6	0505A	4	JBBB003D_scaffold_4	6
75195	0.117647	0505A	15	JBBB003D_scaffold_53	2
1	0	0505A	2	JBBB003D_scaffold_1333	0
11066	NA	0505A	0	JBBB003D_scaffold_756	0
63300	0.285714	0505A	40	JBBB003D_scaffold_41	16
44490	0.679612	0505A	33	JBBB003D_scaffold_92	70
487204	0.25	0505A	9	JBBB003D_scaffold_4	3
744	0.393939	0505A	20	JBBB003D_scaffold_12	13
57529	0.25	0505A	6	JBBB003D_scaffold_77	2
487061	0.25	0505A	42	JBBB003D_scaffold_4	14
3025	0.146341	0505A	35	JBBB003D_scaffold_170	6
1430	NA	0505A	0	JBBB003D_scaffold_756	0
3021	0.153846	0505A	33	JBBB003D_scaffold_170	6
1130	0.305556	0505A	25	JBBB003D_scaffold_1304	11
278355	0	0505A	46	JBBB003D_scaffold_2	0
2732	0.8	0505A	2	JBBB003D_scaffold_1304	8
3028	0.146341	0505A	35	JBBB003D_scaffold_170	6
1842	0	0505A	38	JBBB003D_scaffold_1304	0
95370	0.613333	0505A	29	JBBB003D_scaffold_41	46
279262	0.0444444	0505A	43	JBBB003D_scaffold_2	2
3459	0.317073	0505A	28	JBBB003D_scaffold_1304	13
6015	0	0505A	89	JBBB003D_scaffold_1304	0
2257	NA	0505A	0	JBBB003D_scaffold_1365	0
3302	0.982456	0505A	1	JBBB003D_scaffold_1304	56
43166	0.388889	0505A	11	JBBB003D_scaffold_60	7
129761	0.730769	0505A	7	JBBB003D_scaffold_29	19
1	0	0505A	2	JBBB003D_scaffold_53	0
3083	0.2	0505A	52	JBBB003D_scaffold_260	13
1042	0.666667	0505A	4	JBBB003D_scaffold_92	8
2907	0.25	0505A	24	JBBB003D_scaffold_1345	8
24806	0.5625	0505A	7	JBBB003D_scaffold_58	9
111382	0.494505	0505A	46	JBBB003D_scaffold_60	45
17055	0.540541	0505A	17	JBBB003D_scaffold_29	20
3225	0.172414	0505A	48	JBBB003D_scaffold_103	10
608	0	0505A	93	JBBB003D_scaffold_1304	0
173510	0.263158	0505A	14	JBBB003D_scaffold_21	5
2	0	0505A	1	JBBB003D_scaffold_12	0
68864	0.227273	0505A	17	JBBB003D_scaffold_2	5
12455	0.285714	0505A	10	JBBB003D_scaffold_170	4
3090	0.38	0505A	31	JBBB003D_scaffold_170	19
3822	0.510204	0505A	24	JBBB003D_scaffold_179	25
12323	0.555556	0505A	4	JBBB003D_scaffold_223	5
3634	1	0505A	0	JBBB003D_scaffold_529	43
3347	0.987342	0505A	1	JBBB003D_scaffold_1304	78
28434	0.270588	0505A	62	JBBB003D_scaffold_128	23
579735	0.636364	0505A	8	JBBB003D_scaffold_4	14
3	0.166667	0505A	5	JBBB003D_scaffold_154	1
1427	NA	0505A	0	JBBB003D_scaffold_756	0
3454	0.3125	0505A	33	JBBB003D_scaffold_1304	15
1886	0.0106383	0505A	93	JBBB003D_scaffold_1345	1
182317	1	0505A	0	JBBB003D_scaffold_12	2
173527	0.2	0505A	24	JBBB003D_scaffold_21	6
129772	0.222222	0505A	14	JBBB003D_scaffold_29	4
251089	0	0505A	33	JBBB003D_scaffold_2	0
19518	0.666667	0505A	1	JBBB003D_scaffold_173	2
15546	0.6	0505A	2	JBBB003D_scaffold_222	3
31576	0.26087	0505A	34	JBBB003D_scaffold_170	12
9018	0.631579	0505A	7	JBBB003D_scaffold_389	12
1952	0	0505A	79	JBBB003D_scaffold_1304	0
176476	0.125	0505A	14	JBBB003D_scaffold_21	2
37536	0.0465116	0505A	41	JBBB003D_scaffold_58	2
14094	NA	0505A	0	JBBB003D_scaffold_389	0
33918	0	0505A	4	JBBB003D_scaffold_116	0
15549	0	0505A	1	JBBB003D_scaffold_222	0
1	0.5	0505A	1	JBBB003D_scaffold_170	1
28442	0.378788	0505A	41	JBBB003D_scaffold_128	25
18441	0.358974	0505A	50	JBBB003D_scaffold_183	28
1046	0.25	0505A	9	JBBB003D_scaffold_92	3
6588	NA	0505A	0	JBBB003D_scaffold_529	0
127795	0.52381	0505A	10	JBBB003D_scaffold_21	11
17087	0.666667	0505A	2	JBBB003D_scaffold_200	4
37413	0	0505A	36	JBBB003D_scaffold_58	0
38792	0.235294	0505A	13	JBBB003D_scaffold_4	4
3	0	0505A	3	JBBB003D_scaffold_58	0
4409	0.380952	0505A	26	JBBB003D_scaffold_1345	16
17050	0.0952381	0505A	19	JBBB003D_scaffold_29	2
33215	0.666667	0505A	1	JBBB003D_scaffold_154	2
5652	0.766423	0505A	32	JBBB003D_scaffold_1304	105
110386	0.5	0505A	6	JBBB003D_scaffold_58	6
94321	0.263158	0505A	14	JBBB003D_scaffold_58	5
173535	0.190476	0505A	17	JBBB003D_scaffold_21	4
21702	0.285714	0505A	5	JBBB003D_scaffold_152	2
173518	0.409091	0505A	13	JBBB003D_scaffold_21	9
22757	0.235294	0505A	13	JBBB003D_scaffold_179	4
31585	0.230769	0505A	40	JBBB003D_scaffold_170	12
138256	0.222222	0505A	7	JBBB003D_scaffold_53	2
30734	0.139535	0505A	37	JBBB003D_scaffold_12	6
1392	0.666667	0505A	1	JBBB003D_scaffold_1872	2
4	0.846154	0505A	6	JBBB003D_scaffold_1872	33
2349	0	0505A	70	JBBB003D_scaffold_1304	0
17614	0.294118	0505A	12	JBBB003D_scaffold_29	5
3	0.333333	0505A	10	JBBB003D_scaffold_1304	5
7991	NA	0505A	0	JBBB003D_scaffold_756	0
8563	NA	0505A	0	JBBB003D_scaffold_766	0
2343	0.2	0505A	4	JBBB003D_scaffold_1328	1
28276	0	0505A	3	JBBB003D_scaffold_172	0
36836	0.82996	0505A	84	JBBB003D_scaffold_260	410
4137	NA	0505A	0	JBBB003D_scaffold_766	0
1134	0.765217	0505A	27	JBBB003D_scaffold_1304	88
4	0.454545	0505A	6	JBBB003D_scaffold_41	5
2	NA	0505A	0	JBBB003D_scaffold_766	0
114889	0.025641	0505A	38	JBBB003D_scaffold_29	1
4	NA	0505A	0	JBBB003D_scaffold_529	0
3619	0	0505A	96	JBBB003D_scaffold_179	0
44454	0.611111	0505A	35	JBBB003D_scaffold_92	55
21704	0.4	0505A	3	JBBB003D_scaffold_152	2
5651	0.238095	0505A	32	JBBB003D_scaffold_1304	10
6591	NA	0505A	0	JBBB003D_scaffold_529	0
3907	0	0505A	72	JBBB003D_scaffold_1345	0
36841	0.834008	0505A	82	JBBB003D_scaffold_260	412
6596	NA	0505A	0	JBBB003D_scaffold_529	0
101	0	0505A	66	JBBB003D_scaffold_179	0
12539	0.391892	0505A	45	JBBB003D_scaffold_260	29
2730	0.75	0505A	2	JBBB003D_scaffold_1304	6
4	0.945946	0505A	2	JBBB003D_scaffold_154	35
28525	0.127273	0505A	48	JBBB003D_scaffold_128	7
2255	NA	0505A	0	JBBB003D_scaffold_1365	0
2346	1	0505A	0	JBBB003D_scaffold_1328	1
28526	0.0961538	0505A	47	JBBB003D_scaffold_128	5
3	0	0505A	4	JBBB003D_scaffold_260	0
173519	0.657895	0505A	13	JBBB003D_scaffold_21	25
43172	0.222222	0505A	14	JBBB003D_scaffold_60	4
553	0.524272	0505A	49	JBBB003D_scaffold_12	54
750	0.3125	0505A	11	JBBB003D_scaffold_12	5
114400	0.129032	0505A	27	JBBB003D_scaffold_29	4
86675	0.230769	0505A	40	JBBB003D_scaffold_41	12
68855	0.631579	0505A	14	JBBB003D_scaffold_2	24
2452	0.136364	0505A	57	JBBB003D_scaffold_170	9
30742	0.139535	0505A	37	JBBB003D_scaffold_12	6
403006	0.181818	0505A	18	JBBB003D_scaffold_4	4
33213	0	0505A	4	JBBB003D_scaffold_154	0
251381	0.027027	0505A	36	JBBB003D_scaffold_2	1
24341	0.166667	0505A	15	JBBB003D_scaffold_260	3
1	0	0505A	4	JBBB003D_scaffold_92	0
4747	0	0505A	67	JBBB003D_scaffold_1304	0
3298	NA	0505A	0	JBBB003D_scaffold_756	0
218096	0.26	0505A	37	JBBB003D_scaffold_21	13
1043	0.25	0505A	9	JBBB003D_scaffold_92	3
66417	0	0505A	5	JBBB003D_scaffold_92	0
2	0.571429	0505A	3	JBBB003D_scaffold_1345	4
3210	0	0505A	85	JBBB003D_scaffold_179	0
4	0.851852	0505A	4	JBBB003D_scaffold_2	23
3	0	0505A	3	JBBB003D_scaffold_12	0
14524	0.4375	0505A	18	JBBB003D_scaffold_223	14
218160	0.25	0505A	12	JBBB003D_scaffold_21	4
176471	0.263158	0505A	14	JBBB003D_scaffold_21	5
251466	0.047619	0505A	40	JBBB003D_scaffold_2	2
114475	0.0344828	0505A	28	JBBB003D_scaffold_29	1
37617	0.0980392	0505A	46	JBBB003D_scaffold_58	5
37218	0.0444444	0505A	43	JBBB003D_scaffold_58	2
154452	0.22449	0505A	38	JBBB003D_scaffold_53	11
36645	0.166667	0505A	20	JBBB003D_scaffold_260	4
129762	0.0625	0505A	15	JBBB003D_scaffold_29	1
100	0	0505A	65	JBBB003D_scaffold_179	0
111508	0	0505A	3	JBBB003D_scaffold_60	0
18465	0.448718	0505A	43	JBBB003D_scaffold_183	35
66415	0.625	0505A	3	JBBB003D_scaffold_92	5
1879	0.326531	0505A	33	JBBB003D_scaffold_260	16
3118	0.213115	0505A	48	JBBB003D_scaffold_260	13
3471	1	0505A	0	JBBB003D_scaffold_529	1
174182	0.111111	0505A	16	JBBB003D_scaffold_58	2
138265	0.222222	0505A	14	JBBB003D_scaffold_53	4
94313	0.28	0505A	18	JBBB003D_scaffold_58	7
3	0.833333	0505A	2	JBBB003D_scaffold_92	10
3	0.833333	0505A	3	JBBB003D_scaffold_127	15
97823	0.384615	0505A	40	JBBB003D_scaffold_56	25
5211	0	0505A	95	JBBB003D_scaffold_1304	0
37281	0.0833333	0505A	33	JBBB003D_scaffold_58	3
2319	0.75	0505A	1	JBBB003D_scaffold_1333	3
24347	0.263158	0505A	14	JBBB003D_scaffold_260	5
565	0.524752	0505A	48	JBBB003D_scaffold_12	53
950	0.797101	0505A	28	JBBB003D_scaffold_173	110
3485	0.5	0505A	2	JBBB003D_scaffold_529	2
31588	0.230769	0505A	40	JBBB003D_scaffold_170	12
68755	0.669421	0505A	40	JBBB003D_scaffold_2	81
114694	0.102041	0505A	44	JBBB003D_scaffold_29	5
4	1	0505A	0	JBBB003D_scaffold_4	14
75194	0.117647	0505A	15	JBBB003D_scaffold_53	2
218163	0.2	0505A	4	JBBB003D_scaffold_21	1
174180	0.235294	0505A	13	JBBB003D_scaffold_58	4
38783	0	0506A	32	JBBB003D_scaffold_4	0
17212	0.888889	0506A	3	JBBB003D_scaffold_41	24
3161	NA	0506A	0	JBBB003D_scaffold_260	0
4792	0.0425532	0506A	45	JBBB003D_scaffold_1304	2
1	NA	0506A	0	JBBB003D_scaffold_222	0
37269	NA	0506A	0	JBBB003D_scaffold_58	0
75199	0	0506A	3	JBBB003D_scaffold_53	0
14537	1	0506A	0	JBBB003D_scaffold_223	27
3845	0	0506A	5	JBBB003D_scaffold_1345	0
22885	NA	0506A	0	JBBB003D_scaffold_56	0
110391	0	0506A	1	JBBB003D_scaffold_58	0
39317	NA	0506A	0	JBBB003D_scaffold_101	0
4412	0.7	0506A	3	JBBB003D_scaffold_1345	7
749	0	0506A	11	JBBB003D_scaffold_12	0
115708	NA	0506A	0	JBBB003D_scaffold_4	0
2	NA	0506A	0	JBBB003D_scaffold_1365	0
26741	0	0506A	9	JBBB003D_scaffold_56	0
2450	0.225806	0506A	24	JBBB003D_scaffold_170	7
37181	0	0506A	21	JBBB003D_scaffold_58	0
43163	0	0506A	3	JBBB003D_scaffold_60	0
75203	0	0506A	3	JBBB003D_scaffold_53	0
3743	1	0506A	0	JBBB003D_scaffold_529	69
114922	NA	0506A	0	JBBB003D_scaffold_29	0
115666	NA	0506A	0	JBBB003D_scaffold_4	0
3234	0.0384615	0506A	25	JBBB003D_scaffold_179	1
1	NA	0506A	0	JBBB003D_scaffold_1365	0
2385	NA	0506A	0	JBBB003D_scaffold_1312	0
17609	NA	0506A	0	JBBB003D_scaffold_29	0
24807	1	0506A	0	JBBB003D_scaffold_58	14
57532	NA	0506A	0	JBBB003D_scaffold_77	0
44618	0	0506A	12	JBBB003D_scaffold_92	0
3446	NA	0506A	0	JBBB003D_scaffold_1304	0
14529	1	0506A	0	JBBB003D_scaffold_223	29
3482	NA	0506A	0	JBBB003D_scaffold_529	0
12491	0.0188679	0506A	52	JBBB003D_scaffold_260	1
154585	0	0506A	9	JBBB003D_scaffold_53	0
30952	NA	0506A	0	JBBB003D_scaffold_12	0
3555	1	0506A	0	JBBB003D_scaffold_529	7
28454	0.25	0506A	9	JBBB003D_scaffold_128	3
3472	NA	0506A	0	JBBB003D_scaffold_529	0
18453	0.121212	0506A	29	JBBB003D_scaffold_183	4
579728	NA	0506A	0	JBBB003D_scaffold_4	0
5389	0	0506A	17	JBBB003D_scaffold_1345	0
3661	0	0506A	11	JBBB003D_scaffold_179	0
2475	NA	0506A	0	JBBB003D_scaffold_1304	0
4	NA	0506A	0	JBBB003D_scaffold_170	0
309196	0.416667	0506A	7	JBBB003D_scaffold_2	5
115663	NA	0506A	0	JBBB003D_scaffold_4	0
12326	0	0506A	6	JBBB003D_scaffold_223	0
279472	0	0506A	7	JBBB003D_scaffold_2	0
3732	1	0506A	0	JBBB003D_scaffold_529	69
94333	NA	0506A	0	JBBB003D_scaffold_58	0
936	0	0506A	41	JBBB003D_scaffold_1304	0
143378	NA	0506A	0	JBBB003D_scaffold_29	0
1	NA	0506A	0	JBBB003D_scaffold_101	0
6597	NA	0506A	0	JBBB003D_scaffold_529	0
3844	0.2	0506A	4	JBBB003D_scaffold_1345	1
111397	0	0506A	24	JBBB003D_scaffold_60	0
2557	0.0555556	0506A	17	JBBB003D_scaffold_170	1
643	0	0506A	26	JBBB003D_scaffold_12	0
37383	0.0851064	0506A	43	JBBB003D_scaffold_58	4
21701	NA	0506A	0	JBBB003D_scaffold_152	0
6321	NA	0506A	0	JBBB003D_scaffold_1304	0
487193	NA	0506A	0	JBBB003D_scaffold_4	0
4	NA	0506A	0	JBBB003D_scaffold_116	0
3496	NA	0506A	0	JBBB003D_scaffold_529	0
127788	1	0506A	0	JBBB003D_scaffold_21	9
75205	0	0506A	3	JBBB003D_scaffold_53	0
2	NA	0506A	0	JBBB003D_scaffold_260	0
1936	0.205882	0506A	27	JBBB003D_scaffold_260	7
590269	NA	0506A	0	JBBB003D_scaffold_4	0
3466	NA	0506A	0	JBBB003D_scaffold_1304	0
3943	0	0506A	71	JBBB003D_scaffold_1345	0
2	NA	0506A	0	JBBB003D_scaffold_116	0
3528	1	0506A	0	JBBB003D_scaffold_529	7
251034	0	0506A	7	JBBB003D_scaffold_2	0
24805	0	0506A	14	JBBB003D_scaffold_58	0
2	NA	0506A	0	JBBB003D_scaffold_103	0
3296	NA	0506A	0	JBBB003D_scaffold_997	0
5801	0	0506A	28	JBBB003D_scaffold_1345	0
41779	NA	0506A	0	JBBB003D_scaffold_128	0
33919	1	0506A	0	JBBB003D_scaffold_116	1
111381	0	0506A	24	JBBB003D_scaffold_60	0
3910	0	0506A	52	JBBB003D_scaffold_1345	0
251485	0	0506A	11	JBBB003D_scaffold_2	0
68859	NA	0506A	0	JBBB003D_scaffold_2	0
403007	NA	0506A	0	JBBB003D_scaffold_4	0
3177	0.27451	0506A	37	JBBB003D_scaffold_170	14
2923	0.285714	0506A	20	JBBB003D_scaffold_1345	8
1005	0	0506A	7	JBBB003D_scaffold_170	0
28278	NA	0506A	0	JBBB003D_scaffold_172	0
2	NA	0506A	0	JBBB003D_scaffold_179	0
3031	0.16	0506A	84	JBBB003D_scaffold_170	16
6333	NA	0506A	0	JBBB003D_scaffold_1345	0
1	NA	0506A	0	JBBB003D_scaffold_260	0
5675	0	0506A	4	JBBB003D_scaffold_1304	0
3	NA	0506A	0	JBBB003D_scaffold_29	0
1	0	0506A	1	JBBB003D_scaffold_1312	0
12558	0	0506A	12	JBBB003D_scaffold_260	0
18647	NA	0506A	0	JBBB003D_scaffold_183	0
487096	1	0506A	0	JBBB003D_scaffold_4	2
274	0	0506A	4	JBBB003D_scaffold_12	0
68862	NA	0506A	0	JBBB003D_scaffold_2	0
6013	0	0506A	32	JBBB003D_scaffold_1304	0
6642	NA	0506A	0	JBBB003D_scaffold_529	0
650	0	0506A	20	JBBB003D_scaffold_1304	0
6103	0	0506A	31	JBBB003D_scaffold_1304	0
445	0.888889	0506A	1	JBBB003D_scaffold_12	8
26728	1	0506A	0	JBBB003D_scaffold_56	9
17161	0.387097	0506A	19	JBBB003D_scaffold_41	12
119954	NA	0506A	0	JBBB003D_scaffold_25	0
36636	1	0506A	0	JBBB003D_scaffold_260	7
6058	0	0506A	32	JBBB003D_scaffold_1345	0
12566	0	0506A	12	JBBB003D_scaffold_260	0
26733	1	0506A	0	JBBB003D_scaffold_56	3
4	1	0506A	0	JBBB003D_scaffold_127	44
5807	0	0506A	20	JBBB003D_scaffold_1304	0
403010	NA	0506A	0	JBBB003D_scaffold_4	0
676	0	0506A	24	JBBB003D_scaffold_1304	0
44482	0.644068	0506A	21	JBBB003D_scaffold_92	38
17605	NA	0506A	0	JBBB003D_scaffold_29	0
14087	NA	0506A	0	JBBB003D_scaffold_389	0
3114	0	0506A	5	JBBB003D_scaffold_103	0
36797	0.415913	0506A	323	JBBB003D_scaffold_260	230
30867	0	0506A	12	JBBB003D_scaffold_12	0
239510	NA	0506A	0	JBBB003D_scaffold_58	0
33916	0.857143	0506A	1	JBBB003D_scaffold_116	6
988	1	0506A	0	JBBB003D_scaffold_170	5
37422	0.0425532	0506A	45	JBBB003D_scaffold_58	2
1009	0	0506A	7	JBBB003D_scaffold_170	0
97746	0	0506A	10	JBBB003D_scaffold_56	0
3142	NA	0506A	0	JBBB003D_scaffold_260	0
176464	0	0506A	4	JBBB003D_scaffold_21	0
3759	1	0506A	0	JBBB003D_scaffold_529	69
3163	0.245902	0506A	46	JBBB003D_scaffold_170	15
17608	NA	0506A	0	JBBB003D_scaffold_29	0
402909	1	0506A	0	JBBB003D_scaffold_4	14
4780	0.0212766	0506A	46	JBBB003D_scaffold_1304	1
3515	0	0506A	6	JBBB003D_scaffold_1304	0
14544	1	0506A	0	JBBB003D_scaffold_223	27
30825	0	0506A	12	JBBB003D_scaffold_12	0
1834	0.631579	0506A	14	JBBB003D_scaffold_1304	24
119700	NA	0506A	0	JBBB003D_scaffold_56	0
403011	NA	0506A	0	JBBB003D_scaffold_4	0
4765	0	0506A	26	JBBB003D_scaffold_1345	0
3791	1	0506A	0	JBBB003D_scaffold_529	7
2912	0.581081	0506A	31	JBBB003D_scaffold_1345	43
6320	NA	0506A	0	JBBB003D_scaffold_1304	0
28500	0.25	0506A	9	JBBB003D_scaffold_128	3
2355	0	0506A	15	JBBB003D_scaffold_179	0
875	0	0506A	2	JBBB003D_scaffold_1304	0
3596	1	0506A	0	JBBB003D_scaffold_529	7
28533	0	0506A	9	JBBB003D_scaffold_128	0
12454	0	0506A	12	JBBB003D_scaffold_170	0
12437	0	0506A	3	JBBB003D_scaffold_154	0
37149	0	0506A	45	JBBB003D_scaffold_58	0
38777	0	0506A	33	JBBB003D_scaffold_4	0
3485	NA	0506A	0	JBBB003D_scaffold_1304	0
751	1	0506A	0	JBBB003D_scaffold_12	11
38793	0.653846	0506A	18	JBBB003D_scaffold_4	34
2	NA	0506A	0	JBBB003D_scaffold_1333	0
57533	NA	0506A	0	JBBB003D_scaffold_77	0
3040	0.16	0506A	84	JBBB003D_scaffold_170	16
28527	0	0506A	9	JBBB003D_scaffold_128	0
2459	0.2	0506A	24	JBBB003D_scaffold_170	6
97765	0.1	0506A	9	JBBB003D_scaffold_56	1
44517	0.522727	0506A	21	JBBB003D_scaffold_92	23
24353	0.5	0506A	1	JBBB003D_scaffold_260	1
3	NA	0506A	0	JBBB003D_scaffold_1333	0
2581	0	0506A	10	JBBB003D_scaffold_170	0
2778	0	0506A	40	JBBB003D_scaffold_1345	0
37485	0	0506A	52	JBBB003D_scaffold_58	0
129768	NA	0506A	0	JBBB003D_scaffold_29	0
154691	0	0506A	1	JBBB003D_scaffold_53	0
4	0	0506A	10	JBBB003D_scaffold_1345	0
41780	NA	0506A	0	JBBB003D_scaffold_128	0
5293	0	0506A	15	JBBB003D_scaffold_1345	0
18651	NA	0506A	0	JBBB003D_scaffold_183	0
3	0.816327	0506A	9	JBBB003D_scaffold_152	40
4019	1	0506A	0	JBBB003D_scaffold_766	1
37332	1	0506A	0	JBBB003D_scaffold_58	1
18549	0.526316	0506A	9	JBBB003D_scaffold_183	10
6630	NA	0506A	0	JBBB003D_scaffold_529	0
154470	0	0506A	18	JBBB003D_scaffold_53	0
3579	1	0506A	0	JBBB003D_scaffold_529	7
579729	NA	0506A	0	JBBB003D_scaffold_4	0
29872	NA	0506A	0	JBBB003D_scaffold_223	0
11068	NA	0506A	0	JBBB003D_scaffold_756	0
12427	0.625	0506A	3	JBBB003D_scaffold_154	5
86779	NA	0506A	0	JBBB003D_scaffold_41	0
24801	NA	0506A	0	JBBB003D_scaffold_58	0
3242	1	0506A	0	JBBB003D_scaffold_1304	18
3120	0.319149	0506A	64	JBBB003D_scaffold_170	30
15548	NA	0506A	0	JBBB003D_scaffold_222	0
12425	1	0506A	0	JBBB003D_scaffold_154	3
251476	0	0506A	11	JBBB003D_scaffold_2	0
1039	NA	0506A	0	JBBB003D_scaffold_92	0
94312	0	0506A	8	JBBB003D_scaffold_58	0
3082	0.25	0506A	75	JBBB003D_scaffold_170	25
110396	1	0506A	0	JBBB003D_scaffold_58	1
100	0	0506A	30	JBBB003D_scaffold_1345	0
6606	NA	0506A	0	JBBB003D_scaffold_529	0
30781	0.0666667	0506A	14	JBBB003D_scaffold_12	1
44791	0	0506A	19	JBBB003D_scaffold_92	0
18405	0.0588235	0506A	64	JBBB003D_scaffold_183	4
3617	NA	0506A	0	JBBB003D_scaffold_756	0
2	NA	0506A	0	JBBB003D_scaffold_170	0
7988	NA	0506A	0	JBBB003D_scaffold_756	0
44620	0	0506A	6	JBBB003D_scaffold_92	0
154492	0.0588235	0506A	16	JBBB003D_scaffold_53	1
3898	0	0506A	45	JBBB003D_scaffold_1345	0
38779	0	0506A	32	JBBB003D_scaffold_4	0
37547	0	0506A	4	JBBB003D_scaffold_58	0
3	0	0506A	3	JBBB003D_scaffold_183	0
18756	NA	0506A	0	JBBB003D_scaffold_183	0
14187	1	0506A	0	JBBB003D_scaffold_152	32
998	1	0506A	0	JBBB003D_scaffold_170	1
19172	0	0506A	3	JBBB003D_scaffold_183	0
75209	0	0506A	3	JBBB003D_scaffold_53	0
278340	0	0506A	18	JBBB003D_scaffold_2	0
4	NA	0506A	0	JBBB003D_scaffold_29	0
57531	NA	0506A	0	JBBB003D_scaffold_77	0
218026	NA	0506A	0	JBBB003D_scaffold_21	0
5998	0	0506A	24	JBBB003D_scaffold_1304	0
1833	0.442308	0506A	29	JBBB003D_scaffold_1304	23
94319	NA	0506A	0	JBBB003D_scaffold_58	0
4	0	0506A	3	JBBB003D_scaffold_183	0
218064	1	0506A	0	JBBB003D_scaffold_21	2
3479	NA	0506A	0	JBBB003D_scaffold_1304	0
7993	NA	0506A	0	JBBB003D_scaffold_756	0
60	0.333333	0506A	4	JBBB003D_scaffold_25	2
66418	NA	0506A	0	JBBB003D_scaffold_92	0
3183	0.215385	0506A	51	JBBB003D_scaffold_170	14
3	NA	0506A	0	JBBB003D_scaffold_997	0
12460	NA	0506A	0	JBBB003D_scaffold_170	0
3484	NA	0506A	0	JBBB003D_scaffold_529	0
754	0	0506A	9	JBBB003D_scaffold_12	0
114406	0.233333	0506A	23	JBBB003D_scaffold_29	7
5809	0	0506A	20	JBBB003D_scaffold_1304	0
3	NA	0506A	0	JBBB003D_scaffold_101	0
936	1	0506A	0	JBBB003D_scaffold_173	98
3457	NA	0506A	0	JBBB003D_scaffold_1304	0
31562	0.5	0506A	1	JBBB003D_scaffold_170	1
160	0	0506A	20	JBBB003D_scaffold_1345	0
86772	0	0506A	3	JBBB003D_scaffold_41	0
3293	NA	0506A	0	JBBB003D_scaffold_997	0
872	0	0506A	2	JBBB003D_scaffold_1304	0
1	NA	0506A	0	JBBB003D_scaffold_103	0
12537	0	0506A	29	JBBB003D_scaffold_260	0
1	NA	0506A	0	JBBB003D_scaffold_1304	0
3153	0	0506A	11	JBBB003D_scaffold_179	0
97931	0	0506A	6	JBBB003D_scaffold_56	0
86735	0.2	0506A	4	JBBB003D_scaffold_41	1
889	0.876106	0506A	14	JBBB003D_scaffold_173	99
3721	1	0506A	0	JBBB003D_scaffold_529	69
143376	0	0506A	5	JBBB003D_scaffold_29	0
3128	NA	0506A	0	JBBB003D_scaffold_260	0
2254	NA	0506A	0	JBBB003D_scaffold_1365	0
3403	0	0506A	16	JBBB003D_scaffold_179	0
5836	0	0506A	23	JBBB003D_scaffold_1304	0
2	NA	0506A	0	JBBB003D_scaffold_222	0
36855	1	0506A	0	JBBB003D_scaffold_260	306
3	NA	0506A	0	JBBB003D_scaffold_170	0
1132	NA	0506A	0	JBBB003D_scaffold_1304	0
2384	NA	0506A	0	JBBB003D_scaffold_1312	0
4810	0.0263158	0506A	37	JBBB003D_scaffold_1304	1
12453	0	0506A	12	JBBB003D_scaffold_170	0
5	NA	0506A	0	JBBB003D_scaffold_4	0
590270	NA	0506A	0	JBBB003D_scaffold_4	0
251764	NA	0506A	0	JBBB003D_scaffold_2	0
36641	1	0506A	0	JBBB003D_scaffold_260	7
68757	0.423729	0506A	34	JBBB003D_scaffold_2	25
22900	0	0506A	16	JBBB003D_scaffold_56	0
1	NA	0506A	0	JBBB003D_scaffold_29	0
2	NA	0506A	0	JBBB003D_scaffold_21	0
68850	NA	0506A	0	JBBB003D_scaffold_2	0
18432	0.0869565	0506A	42	JBBB003D_scaffold_183	4
6088	0	0506A	31	JBBB003D_scaffold_1304	0
26757	0	0506A	9	JBBB003D_scaffold_56	0
995	0.6	0506A	4	JBBB003D_scaffold_170	6
3831	NA	0506A	0	JBBB003D_scaffold_179	0
143374	0.807692	0506A	5	JBBB003D_scaffold_29	21
1	NA	0506A	0	JBBB003D_scaffold_223	0
625	0.0645161	0506A	58	JBBB003D_scaffold_12	4
5654	0.333333	0506A	4	JBBB003D_scaffold_1304	2
97737	0	0506A	10	JBBB003D_scaffold_56	0
21700	NA	0506A	0	JBBB003D_scaffold_152	0
174184	1	0506A	0	JBBB003D_scaffold_58	4
121	0	0506A	11	JBBB003D_scaffold_1304	0
12536	0	0506A	29	JBBB003D_scaffold_260	0
3646	1	0506A	0	JBBB003D_scaffold_529	76
4	NA	0506A	0	JBBB003D_scaffold_1304	0
4	0	0506A	9	JBBB003D_scaffold_1312	0
17229	0.365854	0506A	26	JBBB003D_scaffold_41	15
26739	0.75	0506A	3	JBBB003D_scaffold_56	9
97928	0	0506A	6	JBBB003D_scaffold_56	0
3689	0.0714286	0506A	13	JBBB003D_scaffold_389	1
2242	0	0506A	12	JBBB003D_scaffold_1304	0
5704	0	0506A	25	JBBB003D_scaffold_1345	0
403020	NA	0506A	0	JBBB003D_scaffold_4	0
2256	NA	0506A	0	JBBB003D_scaffold_1365	0
251782	NA	0506A	0	JBBB003D_scaffold_2	0
2	NA	0506A	0	JBBB003D_scaffold_183	0
7997	NA	0506A	0	JBBB003D_scaffold_756	0
992	0.4	0506A	6	JBBB003D_scaffold_170	4
66419	NA	0506A	0	JBBB003D_scaffold_92	0
32048	NA	0506A	0	JBBB003D_scaffold_170	0
127783	NA	0506A	0	JBBB003D_scaffold_21	0
4	1	0506A	0	JBBB003D_scaffold_200	90
4	NA	0506A	0	JBBB003D_scaffold_1365	0
31669	0.666667	0506A	4	JBBB003D_scaffold_170	8
37176	0	0506A	21	JBBB003D_scaffold_58	0
3830	NA	0506A	0	JBBB003D_scaffold_179	0
36642	1	0506A	0	JBBB003D_scaffold_260	7
12319	0	0506A	6	JBBB003D_scaffold_223	0
1006	0.142857	0506A	6	JBBB003D_scaffold_170	1
38780	0	0506A	33	JBBB003D_scaffold_4	0
239509	NA	0506A	0	JBBB003D_scaffold_58	0
37293	NA	0506A	0	JBBB003D_scaffold_58	0
12535	0	0506A	29	JBBB003D_scaffold_260	0
251230	NA	0506A	0	JBBB003D_scaffold_2	0
278666	0	0506A	30	JBBB003D_scaffold_2	0
579595	0.153846	0506A	22	JBBB003D_scaffold_4	4
5402	0	0506A	24	JBBB003D_scaffold_1304	0
4	NA	0506A	0	JBBB003D_scaffold_128	0
4	NA	0506A	0	JBBB003D_scaffold_53	0
487191	NA	0506A	0	JBBB003D_scaffold_4	0
1900	0.175	0506A	33	JBBB003D_scaffold_260	7
997	1	0506A	0	JBBB003D_scaffold_170	1
6010	0	0506A	32	JBBB003D_scaffold_1304	0
2	NA	0506A	0	JBBB003D_scaffold_53	0
21220	NA	0506A	0	JBBB003D_scaffold_389	0
3	1	0506A	0	JBBB003D_scaffold_25	6
2383	NA	0506A	0	JBBB003D_scaffold_1312	0
36796	0.52322	0506A	154	JBBB003D_scaffold_260	169
2189	0	0506A	10	JBBB003D_scaffold_1304	0
251032	0	0506A	7	JBBB003D_scaffold_2	0
18434	0.0869565	0506A	42	JBBB003D_scaffold_183	4
38376	NA	0506A	0	JBBB003D_scaffold_103	0
36744	0.941818	0506A	16	JBBB003D_scaffold_260	259
97813	0	0506A	6	JBBB003D_scaffold_56	0
279242	0.540541	0506A	17	JBBB003D_scaffold_2	20
251467	0	0506A	11	JBBB003D_scaffold_2	0
37546	0	0506A	4	JBBB003D_scaffold_58	0
2726	0.859375	0506A	9	JBBB003D_scaffold_1304	55
2600	0	0506A	10	JBBB003D_scaffold_170	0
97916	0.333333	0506A	12	JBBB003D_scaffold_56	6
24334	0	0506A	5	JBBB003D_scaffold_260	0
24339	0	0506A	6	JBBB003D_scaffold_260	0
277	0	0506A	4	JBBB003D_scaffold_12	0
579620	0.192308	0506A	21	JBBB003D_scaffold_4	5
3476	NA	0506A	0	JBBB003D_scaffold_529	0
4600	0.0526316	0506A	18	JBBB003D_scaffold_1304	1
31577	0.888889	0506A	1	JBBB003D_scaffold_170	8
26761	0	0506A	9	JBBB003D_scaffold_56	0
17610	NA	0506A	0	JBBB003D_scaffold_29	0
1	NA	0506A	0	JBBB003D_scaffold_21	0
1012	0	0506A	7	JBBB003D_scaffold_170	0
22888	NA	0506A	0	JBBB003D_scaffold_56	0
37159	NA	0506A	0	JBBB003D_scaffold_260	0
86774	0.5	0506A	3	JBBB003D_scaffold_41	3
575	0.309859	0506A	49	JBBB003D_scaffold_12	22
278622	0	0506A	7	JBBB003D_scaffold_2	0
3483	NA	0506A	0	JBBB003D_scaffold_529	0
2	NA	0506A	0	JBBB003D_scaffold_223	0
19176	NA	0506A	0	JBBB003D_scaffold_183	0
174183	0	0506A	4	JBBB003D_scaffold_58	0
3226	1	0506A	0	JBBB003D_scaffold_1304	10
3	NA	0506A	0	JBBB003D_scaffold_173	0
95383	0.277778	0506A	13	JBBB003D_scaffold_41	5
143373	0	0506A	5	JBBB003D_scaffold_29	0
111407	0	0506A	16	JBBB003D_scaffold_60	0
1	NA	0506A	0	JBBB003D_scaffold_172	0
94316	NA	0506A	0	JBBB003D_scaffold_58	0
278384	0	0506A	20	JBBB003D_scaffold_2	0
14531	1	0506A	0	JBBB003D_scaffold_223	29
154690	0	0506A	1	JBBB003D_scaffold_53	0
3981	0	0506A	9	JBBB003D_scaffold_1304	0
2	NA	0506A	0	JBBB003D_scaffold_58	0
3188	0.27451	0506A	37	JBBB003D_scaffold_170	14
44413	0.793103	0506A	6	JBBB003D_scaffold_92	23
154210	0.5	0506A	2	JBBB003D_scaffold_53	2
1	NA	0506A	0	JBBB003D_scaffold_1872	0
37197	0	0506A	21	JBBB003D_scaffold_58	0
18410	0.0833333	0506A	44	JBBB003D_scaffold_183	4
9023	0	0506A	5	JBBB003D_scaffold_389	0
571	0.3875	0506A	49	JBBB003D_scaffold_12	31
6319	NA	0506A	0	JBBB003D_scaffold_1304	0
1394	NA	0506A	0	JBBB003D_scaffold_1872	0
6609	NA	0506A	0	JBBB003D_scaffold_529	0
1035	0	0506A	40	JBBB003D_scaffold_1304	0
1247	0	0506A	20	JBBB003D_scaffold_1304	0
97744	0	0506A	10	JBBB003D_scaffold_56	0
278701	0	0506A	30	JBBB003D_scaffold_2	0
249	0	0506A	7	JBBB003D_scaffold_1345	0
3671	0.0714286	0506A	13	JBBB003D_scaffold_389	1
598	0.328571	0506A	47	JBBB003D_scaffold_12	23
2914	0.462687	0506A	36	JBBB003D_scaffold_1345	31
127792	0.5	0506A	9	JBBB003D_scaffold_21	9
1839	0.631579	0506A	14	JBBB003D_scaffold_1304	24
2387	NA	0506A	0	JBBB003D_scaffold_1312	0
579727	0	0506A	4	JBBB003D_scaffold_4	0
138267	NA	0506A	0	JBBB003D_scaffold_53	0
17086	NA	0506A	0	JBBB003D_scaffold_200	0
95508	1	0506A	0	JBBB003D_scaffold_41	4
4141	NA	0506A	0	JBBB003D_scaffold_766	0
2903	0.5	0506A	16	JBBB003D_scaffold_1345	16
2437	0.28125	0506A	23	JBBB003D_scaffold_170	9
114595	0	0506A	15	JBBB003D_scaffold_29	0
75197	0	0506A	3	JBBB003D_scaffold_53	0
12327	1	0506A	0	JBBB003D_scaffold_223	6
1853	0.411765	0506A	10	JBBB003D_scaffold_260	7
4	NA	0506A	0	JBBB003D_scaffold_92	0
86776	0	0506A	3	JBBB003D_scaffold_41	0
3834	NA	0506A	0	JBBB003D_scaffold_179	0
111409	0	0506A	16	JBBB003D_scaffold_60	0
3839	NA	0506A	0	JBBB003D_scaffold_529	0
2449	0.2	0506A	24	JBBB003D_scaffold_170	6
5844	0	0506A	13	JBBB003D_scaffold_1304	0
12565	0	0506A	12	JBBB003D_scaffold_260	0
19519	NA	0506A	0	JBBB003D_scaffold_173	0
3913	0	0506A	52	JBBB003D_scaffold_1345	0
95507	0	0506A	5	JBBB003D_scaffold_41	0
251090	0	0506A	7	JBBB003D_scaffold_2	0
44708	0	0506A	4	JBBB003D_scaffold_92	0
2729	0	0506A	9	JBBB003D_scaffold_1304	0
239507	NA	0506A	0	JBBB003D_scaffold_58	0
31108	NA	0506A	0	JBBB003D_scaffold_12	0
3342	NA	0506A	0	JBBB003D_scaffold_997	0
129776	NA	0506A	0	JBBB003D_scaffold_29	0
3	NA	0506A	0	JBBB003D_scaffold_179	0
94140	0	0506A	27	JBBB003D_scaffold_58	0
1971	0	0506A	52	JBBB003D_scaffold_1345	0
251494	0	0506A	11	JBBB003D_scaffold_2	0
4	NA	0506A	0	JBBB003D_scaffold_222	0
18649	NA	0506A	0	JBBB003D_scaffold_183	0
11071	NA	0506A	0	JBBB003D_scaffold_756	0
335	0.0714286	0506A	13	JBBB003D_scaffold_1345	1
278425	0	0506A	5	JBBB003D_scaffold_2	0
174177	NA	0506A	0	JBBB003D_scaffold_58	0
29303	NA	0506A	0	JBBB003D_scaffold_127	0
182314	0	0506A	4	JBBB003D_scaffold_12	0
37292	NA	0506A	0	JBBB003D_scaffold_58	0
278419	0.2	0506A	4	JBBB003D_scaffold_2	1
38788	0	0506A	32	JBBB003D_scaffold_4	0
251425	0	0506A	11	JBBB003D_scaffold_2	0
129759	0	0506A	1	JBBB003D_scaffold_29	0
4756	0	0506A	26	JBBB003D_scaffold_1345	0
4	NA	0506A	0	JBBB003D_scaffold_12	0
174175	NA	0506A	0	JBBB003D_scaffold_58	0
3	NA	0506A	0	JBBB003D_scaffold_2	0
3922	0	0506A	53	JBBB003D_scaffold_1345	0
154593	0	0506A	9	JBBB003D_scaffold_53	0
541	0.3875	0506A	49	JBBB003D_scaffold_12	31
1	NA	0506A	0	JBBB003D_scaffold_116	0
119702	1	0506A	0	JBBB003D_scaffold_56	1
37163	0	0506A	46	JBBB003D_scaffold_58	0
8566	NA	0506A	0	JBBB003D_scaffold_766	0
12519	0.047619	0506A	40	JBBB003D_scaffold_260	2
138257	NA	0506A	0	JBBB003D_scaffold_53	0
2320	NA	0506A	0	JBBB003D_scaffold_1333	0
119698	0.8	0506A	1	JBBB003D_scaffold_56	4
1939	0.205882	0506A	27	JBBB003D_scaffold_260	7
86614	0.0357143	0506A	27	JBBB003D_scaffold_41	1
43165	0.4	0506A	3	JBBB003D_scaffold_60	2
4	NA	0506A	0	JBBB003D_scaffold_56	0
2919	0.459459	0506A	20	JBBB003D_scaffold_1345	17
1835	0.5625	0506A	14	JBBB003D_scaffold_1304	18
14528	0.931034	0506A	2	JBBB003D_scaffold_223	27
39316	NA	0506A	0	JBBB003D_scaffold_101	0
63338	NA	0506A	0	JBBB003D_scaffold_41	0
2285	NA	0506A	0	JBBB003D_scaffold_1345	0
2	NA	0506A	0	JBBB003D_scaffold_2	0
3748	0	0506A	69	JBBB003D_scaffold_529	0
21705	NA	0506A	0	JBBB003D_scaffold_152	0
1013	0	0506A	7	JBBB003D_scaffold_170	0
1	NA	0506A	0	JBBB003D_scaffold_200	0
17051	1	0506A	0	JBBB003D_scaffold_29	5
24815	0	0506A	14	JBBB003D_scaffold_58	0
2354	0	0506A	15	JBBB003D_scaffold_179	0
6043	0	0506A	40	JBBB003D_scaffold_1304	0
1137	NA	0506A	0	JBBB003D_scaffold_1304	0
1641	0	0506A	66	JBBB003D_scaffold_1304	0
129757	0	0506A	1	JBBB003D_scaffold_29	0
1	NA	0506A	0	JBBB003D_scaffold_56	0
635	0	0506A	20	JBBB003D_scaffold_1304	0
1843	0.831579	0506A	32	JBBB003D_scaffold_1304	158
182316	1	0506A	0	JBBB003D_scaffold_12	4
2453	0.233333	0506A	23	JBBB003D_scaffold_170	7
174160	NA	0506A	0	JBBB003D_scaffold_58	0
1570	0	0506A	65	JBBB003D_scaffold_1304	0
1584	0	0506A	91	JBBB003D_scaffold_1304	0
75204	0	0506A	3	JBBB003D_scaffold_53	0
63314	NA	0506A	0	JBBB003D_scaffold_41	0
17088	NA	0506A	0	JBBB003D_scaffold_200	0
1948	0	0506A	47	JBBB003D_scaffold_1304	0
360755	NA	0506A	0	JBBB003D_scaffold_2	0
44601	0	0506A	20	JBBB003D_scaffold_92	0
18646	NA	0506A	0	JBBB003D_scaffold_183	0
251320	0.333333	0506A	14	JBBB003D_scaffold_2	7
21222	NA	0506A	0	JBBB003D_scaffold_389	0
3700	0	0506A	11	JBBB003D_scaffold_179	0
5797	0	0506A	20	JBBB003D_scaffold_1304	0
1219	0	0506A	20	JBBB003D_scaffold_1304	0
2317	NA	0506A	0	JBBB003D_scaffold_1333	0
57530	NA	0506A	0	JBBB003D_scaffold_77	0
9019	0	0506A	3	JBBB003D_scaffold_389	0
12428	0.666667	0506A	1	JBBB003D_scaffold_154	2
6322	NA	0506A	0	JBBB003D_scaffold_1304	0
33214	NA	0506A	0	JBBB003D_scaffold_154	0
755	0	0506A	11	JBBB003D_scaffold_12	0
218052	1	0506A	0	JBBB003D_scaffold_21	2
1659	0	0506A	66	JBBB003D_scaffold_1304	0
3	NA	0506A	0	JBBB003D_scaffold_128	0
3468	NA	0506A	0	JBBB003D_scaffold_529	0
173528	NA	0506A	0	JBBB003D_scaffold_21	0
24355	0.833333	0506A	1	JBBB003D_scaffold_260	5
86777	0	0506A	3	JBBB003D_scaffold_41	0
28512	0	0506A	9	JBBB003D_scaffold_128	0
3789	0	0506A	7	JBBB003D_scaffold_529	0
1975	0.2	0506A	28	JBBB003D_scaffold_260	7
508	0.449275	0506A	38	JBBB003D_scaffold_12	31
28277	0	0506A	2	JBBB003D_scaffold_172	0
114424	0	0506A	30	JBBB003D_scaffold_29	0
403008	NA	0506A	0	JBBB003D_scaffold_4	0
111370	0	0506A	32	JBBB003D_scaffold_60	0
37290	NA	0506A	0	JBBB003D_scaffold_58	0
182315	0	0506A	4	JBBB003D_scaffold_12	0
68639	0	0506A	39	JBBB003D_scaffold_2	0
614	0	0506A	18	JBBB003D_scaffold_1304	0
2913	0.619048	0506A	16	JBBB003D_scaffold_1345	26
26747	0	0506A	9	JBBB003D_scaffold_56	0
218162	0	0506A	2	JBBB003D_scaffold_21	0
3243	1	0506A	0	JBBB003D_scaffold_1304	18
6329	NA	0506A	0	JBBB003D_scaffold_1345	0
604	0.318841	0506A	47	JBBB003D_scaffold_12	22
68615	1	0506A	0	JBBB003D_scaffold_2	18
579738	NA	0506A	0	JBBB003D_scaffold_4	0
1	NA	0506A	0	JBBB003D_scaffold_41	0
3038	0.16	0506A	84	JBBB003D_scaffold_170	16
6330	NA	0506A	0	JBBB003D_scaffold_1345	0
111325	0	0506A	34	JBBB003D_scaffold_60	0
12438	0	0506A	3	JBBB003D_scaffold_154	0
44697	0	0506A	4	JBBB003D_scaffold_92	0
97926	0.5	0506A	6	JBBB003D_scaffold_56	6
182313	0.8	0506A	4	JBBB003D_scaffold_12	16
41777	NA	0506A	0	JBBB003D_scaffold_128	0
44523	0.534884	0506A	20	JBBB003D_scaffold_92	23
3	1	0506A	0	JBBB003D_scaffold_1312	9
415	0	0506A	1	JBBB003D_scaffold_12	0
1007	0	0506A	7	JBBB003D_scaffold_170	0
487188	NA	0506A	0	JBBB003D_scaffold_4	0
115678	NA	0506A	0	JBBB003D_scaffold_4	0
1625	0	0506A	84	JBBB003D_scaffold_1304	0
3080	0	0506A	9	JBBB003D_scaffold_260	0
37560	0	0506A	4	JBBB003D_scaffold_58	0
577	0.323944	0506A	48	JBBB003D_scaffold_12	23
218024	NA	0506A	0	JBBB003D_scaffold_21	0
9769	NA	0506A	0	JBBB003D_scaffold_766	0
12441	0	0506A	3	JBBB003D_scaffold_154	0
12434	0	0506A	3	JBBB003D_scaffold_154	0
17054	1	0506A	0	JBBB003D_scaffold_29	5
1051	0	0506A	1	JBBB003D_scaffold_92	0
2292	NA	0506A	0	JBBB003D_scaffold_1345	0
17604	NA	0506A	0	JBBB003D_scaffold_29	0
309190	0.363636	0506A	7	JBBB003D_scaffold_2	4
22882	NA	0506A	0	JBBB003D_scaffold_56	0
37296	NA	0506A	0	JBBB003D_scaffold_58	0
2	NA	0506A	0	JBBB003D_scaffold_200	0
50903	0	0506A	25	JBBB003D_scaffold_60	0
14530	0.931034	0506A	2	JBBB003D_scaffold_223	27
39318	NA	0506A	0	JBBB003D_scaffold_101	0
3829	NA	0506A	0	JBBB003D_scaffold_179	0
24343	0.5	0506A	5	JBBB003D_scaffold_260	5
18669	1	0506A	0	JBBB003D_scaffold_183	1
43157	0	0506A	3	JBBB003D_scaffold_60	0
4	NA	0506A	0	JBBB003D_scaffold_260	0
4023	1	0506A	0	JBBB003D_scaffold_766	1
241993	1	0506A	0	JBBB003D_scaffold_4	29
1049	NA	0506A	0	JBBB003D_scaffold_92	0
111505	NA	0506A	0	JBBB003D_scaffold_60	0
68856	NA	0506A	0	JBBB003D_scaffold_2	0
22892	NA	0506A	0	JBBB003D_scaffold_56	0
75208	0	0506A	3	JBBB003D_scaffold_53	0
1831	0.216216	0506A	29	JBBB003D_scaffold_1304	8
37368	0	0506A	26	JBBB003D_scaffold_58	0
487195	NA	0506A	0	JBBB003D_scaffold_4	0
114421	0.266667	0506A	22	JBBB003D_scaffold_29	8
2	NA	0506A	0	JBBB003D_scaffold_172	0
3177	NA	0506A	0	JBBB003D_scaffold_103	0
4390	0	0506A	15	JBBB003D_scaffold_1304	0
36734	0.90303	0506A	16	JBBB003D_scaffold_260	149
590273	NA	0506A	0	JBBB003D_scaffold_4	0
5755	0	0506A	24	JBBB003D_scaffold_1304	0
37134	0	0506A	46	JBBB003D_scaffold_58	0
827	0.635135	0506A	27	JBBB003D_scaffold_173	47
590271	NA	0506A	0	JBBB003D_scaffold_4	0
97745	0	0506A	10	JBBB003D_scaffold_56	0
5688	0	0506A	14	JBBB003D_scaffold_1304	0
154456	0	0506A	17	JBBB003D_scaffold_53	0
3928	0	0506A	56	JBBB003D_scaffold_1345	0
26743	0	0506A	9	JBBB003D_scaffold_56	0
3	0	0506A	10	JBBB003D_scaffold_1345	0
97932	0	0506A	6	JBBB003D_scaffold_56	0
1	NA	0506A	0	JBBB003D_scaffold_58	0
97753	0	0506A	10	JBBB003D_scaffold_56	0
143375	1	0506A	0	JBBB003D_scaffold_29	5
1044	NA	0506A	0	JBBB003D_scaffold_92	0
1423	NA	0506A	0	JBBB003D_scaffold_756	0
2294	NA	0506A	0	JBBB003D_scaffold_1345	0
18653	NA	0506A	0	JBBB003D_scaffold_183	0
3821	NA	0506A	0	JBBB003D_scaffold_529	0
2911	0.111111	0506A	32	JBBB003D_scaffold_1345	4
30804	0	0506A	23	JBBB003D_scaffold_12	0
18474	0.121212	0506A	29	JBBB003D_scaffold_183	4
37356	0	0506A	1	JBBB003D_scaffold_58	0
31578	0.888889	0506A	1	JBBB003D_scaffold_170	8
44399	0.714286	0506A	6	JBBB003D_scaffold_92	15
31182	0	0506A	4	JBBB003D_scaffold_12	0
250990	0	0506A	35	JBBB003D_scaffold_2	0
3	NA	0506A	0	JBBB003D_scaffold_529	0
95509	1	0506A	0	JBBB003D_scaffold_41	4
173532	NA	0506A	0	JBBB003D_scaffold_21	0
14527	0	0506A	29	JBBB003D_scaffold_223	0
12459	NA	0506A	0	JBBB003D_scaffold_170	0
2	NA	0506A	0	JBBB003D_scaffold_128	0
1056	0	0506A	1	JBBB003D_scaffold_92	0
845	0	0506A	2	JBBB003D_scaffold_1304	0
302	NA	0506A	0	JBBB003D_scaffold_12	0
2734	1	0506A	0	JBBB003D_scaffold_1304	9
1836	0.473684	0506A	20	JBBB003D_scaffold_1304	18
30870	0	0506A	12	JBBB003D_scaffold_12	0
3033	0.16	0506A	84	JBBB003D_scaffold_170	16
12320	0	0506A	6	JBBB003D_scaffold_223	0
14540	NA	0506A	0	JBBB003D_scaffold_223	0
2413	0	0506A	10	JBBB003D_scaffold_1304	0
7989	NA	0506A	0	JBBB003D_scaffold_756	0
31571	0.888889	0506A	1	JBBB003D_scaffold_170	8
188	0	0506A	10	JBBB003D_scaffold_179	0
5999	0	0506A	24	JBBB003D_scaffold_1304	0
37614	NA	0506A	0	JBBB003D_scaffold_58	0
36799	0.955056	0506A	8	JBBB003D_scaffold_260	170
28275	0	0506A	5	JBBB003D_scaffold_172	0
28437	0.2	0506A	12	JBBB003D_scaffold_128	3
138260	NA	0506A	0	JBBB003D_scaffold_53	0
2310	0	0506A	13	JBBB003D_scaffold_1304	0
4140	NA	0506A	0	JBBB003D_scaffold_766	0
1	NA	0506A	0	JBBB003D_scaffold_173	0
31564	0.5	0506A	1	JBBB003D_scaffold_170	1
3918	0	0506A	53	JBBB003D_scaffold_1345	0
31590	0.888889	0506A	1	JBBB003D_scaffold_170	8
1837	0.631579	0506A	14	JBBB003D_scaffold_1304	24
3826	NA	0506A	0	JBBB003D_scaffold_179	0
97941	0	0506A	6	JBBB003D_scaffold_56	0
[truncated: 30,281 more rows]

## Sheet: CRISPR_varients
Project	Varient_CRISPR_percent
0505A	0
0506A	0
0507A
0508A
0511A	0.621622
0512W
0514A	0.836611
0514Y
0515A	0.774521
0516A	0.808547
0517A	0.687347
0518A	0.632055
0519A	0.658899
0520A	0.671279
0521A	0.675982
0522A	0.538707
0522W	0.597747
0523A	0.672838
0524A	0.687352
0525A	0.440347
0526A	0.336577
0527A	0.208189
0528A	0.0429307
0528Y
