# Supplementary material for: Identical bacterial populations colonize premature infant gut, skin, and oral microbiomes and exhibit different in situ growth rates
Source: Genome Res. 2017 Apr;27(4):601–12. doi: 10.1101/gr.213256.116 (PMC5378178; doi:10.1101/gr.213256.116)
Supplement: Supplemental Material [file supp_gr.213256.116_Supplemental_Table_S8.xlsx]

## Sheet: Table8_PTR_calculations.csv
genome	sample	PTR	coverage
0525A0216_Klebsiella_pneumoniae_57_51	0507A	0.989353	116.119
0525A0216_Klebsiella_pneumoniae_57_51	0520A	1.00294	18.9935
0528Y_Escherichia_coli_51_14	0507A	1.00974	77.3807
0525A0216_Klebsiella_pneumoniae_57_51	0523A	1.04846	17.1021
0525A0216_Klebsiella_pneumoniae_57_51	0508A	1.04952	220.428
0525A0216_Klebsiella_pneumoniae_57_51	0527A	1.05338	52.7683
0113A1018_Enterococcus_faecalis_36_17	0115A	1.06142	28.8897
0520A0211_Propionibacterium_sp__HGH0353_63_15	0516A	1.06282	25.5811
0506A0128_Streptococcus_agalactiae_35_952	0506A	1.07072	936.303
0506A0128_Streptococcus_agalactiae_35_952	0505A	1.09027	1220.87
0525A0216_Klebsiella_pneumoniae_57_51	0515A	1.09276	32.6777
0525A0216_Klebsiella_pneumoniae_57_51	0511A	1.10165	127.485
0525A0216_Klebsiella_pneumoniae_57_51	0528A	1.11287	14.5303
0520A0211_Propionibacterium_sp__HGH0353_63_15	0517A	1.12196	30.2006
0520A0211_Propionibacterium_sp__HGH0353_63_15	0518A	1.1222	18.8445
0525A0216_Klebsiella_pneumoniae_57_51	0519A	1.12641	19.3354
0113A1018_Enterococcus_faecalis_36_17	0113A	1.1347	15.2168
0528Y_Escherichia_coli_51_14	0508A	1.13577	222.744
0528Y_Escherichia_coli_51_14	0522A	1.13614	285.347
0519A0210_Enterococcus_faecalis_37_406	0515A	1.13804	19.4471
0520A0211_Propionibacterium_sp__HGH0353_63_15	0519A	1.14138	23.6811
0113A1018_Enterococcus_faecalis_36_17	0114A	1.1436	21.7026
0525A0216_Klebsiella_pneumoniae_57_51	0521A	1.14548	24.9853
0525A0216_Klebsiella_pneumoniae_57_51	0514A	1.14587	34.005
0520A0211_Propionibacterium_sp__HGH0353_63_15	0524A	1.15091	122.286
0519A0210_Enterococcus_faecalis_37_406	0511A	1.15343	54.4815
0520A0211_Propionibacterium_sp__HGH0353_63_15	0528A	1.1567	23.2377
0113A1018_Enterococcus_faecalis_36_17	0116A	1.17418	136.978
0520A0211_Propionibacterium_sp__HGH0353_63_15	0526A	1.17615	368.378
0528Y_Escherichia_coli_51_14	0511A	1.18086	414.271
0525A0216_Klebsiella_pneumoniae_57_51	0516A	1.18405	42.8938
0528Y_Escherichia_coli_51_14	0527A	1.18708	255.507
0113A1018_Enterococcus_faecalis_36_17	0117A	1.18771	42.5792
0113A1018_Enterococcus_faecalis_36_17	0119A	1.19175	74.6374
0525A0216_Klebsiella_pneumoniae_57_51	0522A	1.19523	25.8394
0113A1018_Enterococcus_faecalis_36_17	0126A	1.19702	92.092
0520A0211_Propionibacterium_sp__HGH0353_63_15	0525A	1.20253	87.2401
0528Y_Escherichia_coli_51_14	0525A	1.20351	390.863
0519A0210_Enterococcus_faecalis_37_406	0514A	1.20988	23.1535
0520A0211_Propionibacterium_sp__HGH0353_63_15	0522A	1.2114	22.7917
0528Y_Escherichia_coli_51_14	0514A	1.22138	643.216
0525A0216_Klebsiella_pneumoniae_57_51	0517A	1.22531	60.0996
0123Y_Haemophilus_parainfluenzae_40_43	0123Y	1.22631	67.8459
0528Y_Escherichia_coli_51_14	0524A	1.22693	374.556
0520A0211_Propionibacterium_sp__HGH0353_63_15	0521A	1.23144	24.0119
0528Y_Escherichia_coli_51_14	0515A	1.23457	515.669
0519A0210_Enterococcus_faecalis_37_406	0516A	1.23486	82.3392
0113A1018_Enterococcus_faecalis_36_17	0125A	1.24061	31.4788
0520A0211_Propionibacterium_sp__HGH0353_63_15	0520A	1.24388	12.1496
0525A0216_Klebsiella_pneumoniae_57_51	0518A	1.24464	44.5426
0528Y_Escherichia_coli_51_14	0519A	1.2496	339.379
0528Y_Escherichia_coli_51_14	0520A	1.24982	518.98
0525A0216_Klebsiella_pneumoniae_57_51	0524A	1.25009	37.6278
0113A1018_Enterococcus_faecalis_36_17	0118A	1.25082	47.8368
0519A0210_Enterococcus_faecalis_37_406	0506A	1.25165	13.5236
0528Y_Escherichia_coli_51_14	0521A	1.25827	486.116
0525A0216_Klebsiella_pneumoniae_57_51	0525A	1.26229	47.7829
0519A0210_Enterococcus_faecalis_37_406	0528A	1.26912	57.6625
0113A1018_Enterococcus_faecalis_36_17	0123A	1.2703	64.8719
0528Y_Escherichia_coli_51_14	0516A	1.2708	372.58
0528Y_Escherichia_coli_51_14	0518A	1.27103	527.101
0119A1024_Clostridium_difficile_29_11	0113A	1.27275	15.2015
0525A0216_Klebsiella_pneumoniae_57_51	0526A	1.27283	209.959
0519A0210_Enterococcus_faecalis_37_406	0517A	1.28107	249.901
0113A1018_Enterococcus_faecalis_36_17	0121A	1.2862	22.0233
0113A1018_Enterococcus_faecalis_36_17	0120A	1.29213	36.5965
0528Y_Escherichia_coli_51_14	0517A	1.29953	539.612
0528Y_Streptococcus_39_12	0528Y	1.30539	19.3868
0520A0211_Propionibacterium_sp__HGH0353_63_15	0527A	1.30715	26.2115
0519A0210_Enterococcus_faecalis_37_406	0524A	1.30811	277.603
0113A1018_Enterococcus_faecalis_36_17	0124A	1.31004	100.034
0528Y_Escherichia_coli_51_14	0526A	1.31225	473.437
0519A0210_Enterococcus_faecalis_37_406	0526A	1.31545	496.994
0522A0213_Clostridium_perfringens_28_397	0523A	1.3217	434.65
0123A_Citrobacter_koseri_6	0110A	1.3343	590.105
0528Y_Escherichia_coli_51_14	0528A	1.3361	320.111
0519A0210_Enterococcus_faecalis_37_406	0518A	1.33627	220.83
0511A0202_Pseudomonas_aeruginosa_66_19	0511A	1.3504	16.03
0123A_Citrobacter_koseri_6	0114A	1.3518	653.156
0119A1024_Clostridium_difficile_29_11	0123A	1.35246	7.56718
0519A0210_Enterococcus_faecalis_37_406	0525A	1.35377	332.208
0522W_Corynebacterium_59_9	0522W	1.36903	14.1945
0527A0218_Serratia_marcescens_60_106	0522A	1.37367	127.299
0519A0210_Enterococcus_faecalis_37_406	0520A	1.37396	193.145
0522A0213_Clostridium_perfringens_28_397	0522A	1.37774	332.727
0519A0210_Enterococcus_faecalis_37_406	0519A	1.37869	383.63
0527A0218_Serratia_marcescens_60_106	0519A	1.38109	6.93057
0522A0213_Clostridium_perfringens_28_397	0525A	1.38564	46.0404
0113A1018_Enterococcus_faecalis_36_17	0127A	1.38596	49.8712
0519A0210_Enterococcus_faecalis_37_406	0522A	1.38623	181.154
0527A0218_Serratia_marcescens_60_106	0520A	1.38872	11.9678
0123A_Citrobacter_koseri_6	0120A	1.39385	577.541
0123A_Citrobacter_koseri_6	0118A	1.3954	402.334
0123A_Citrobacter_koseri_6	0112A	1.40211	768.705
0527A0218_Serratia_marcescens_60_106	0521A	1.4023	15.4821
0519A0210_Enterococcus_faecalis_37_406	0521A	1.40512	86.8663
0123A_Citrobacter_koseri_6	0125A	1.40607	522.449
0527A0218_Serratia_marcescens_60_106	0527A	1.40968	91.9355
0519A0210_Enterococcus_faecalis_37_406	0527A	1.4178	118.773
0527A0218_Serratia_marcescens_60_106	0525A	1.42207	54.4537
0123A_Citrobacter_koseri_6	0126A	1.42562	510.178
0123A_Citrobacter_koseri_6	0115A	1.42766	470.209
0123A_Citrobacter_koseri_6	0121A	1.42818	493.551
0123A_Citrobacter_koseri_6	0113A	1.43262	722.337
0123A_Citrobacter_koseri_6	0117A	1.43482	380.116
0119A1024_Clostridium_difficile_29_11	0125A	1.43521	6.31405
0119A1024_Clostridium_difficile_29_11	0120A	1.43697	7.24779
0119A1024_Clostridium_difficile_29_11	0127A	1.43953	8.97887
0123A_Citrobacter_koseri_6	0116A	1.44136	699.007
0123A_Citrobacter_koseri_6	0119A	1.45443	536.2
0527A0218_Serratia_marcescens_60_106	0528A	1.45714	11.4423
0119A1024_Clostridium_difficile_29_11	0114A	1.46158	5.56167
0123A_Citrobacter_koseri_6	0123A	1.46716	458.487
0123W_Corynebacterium_sp__HFH0082_59_121	0123W	1.46978	190.376
0511A0202_Pseudomonas_aeruginosa_66_19	0515A	1.47275	23.0954
0119A1024_Clostridium_difficile_29_11	0121A	1.48298	5.18488
0123A_Citrobacter_koseri_6	0127A	1.48343	224.848
0123Y_Haemophilus_parainfluenzae_40_43	0123W	1.48782	10.3265
0123A_Citrobacter_koseri_6	0124A	1.49103	507.824
0119A1024_Clostridium_difficile_29_11	0119A	1.51077	10.7882
0119A1024_Clostridium_difficile_29_11	0118A	1.51442	5.59124
0119A1024_Clostridium_difficile_29_11	0116A	1.51632	6.4929
0527A0218_Serratia_marcescens_60_106	0524A	1.51834	55.1098
0125A1030_Klebsiella_pneu_56_47	0127A	1.52059	95.9843
0527A0218_Serratia_marcescens_60_106	0526A	1.53745	25.2538
0123A_Citrobacter_koseri_6	0111A	1.54109	570.39
0123W_Staphylococcus_epidermidis_32_35	0123W	1.54316	56.2674
0514Y_Staphylococcus_epidermidis_32_9	0522W	1.54651	6.92104
0119A1024_Clostridium_difficile_29_11	0126A	1.55246	7.67704
0528Y_Streptococcus_mitis_40_11	0528Y	1.56548	17.8464
0522A0213_Clostridium_perfringens_28_397	0524A	1.59157	107.185
0123A_Citrobacter_koseri_6	0123Y	1.6154	312.23
0522A0213_Clostridium_perfringens_28_397	0521A	1.62413	14.4182
0125A1030_Klebsiella_pneu_56_47	0126A	1.62528	20.1023
0522A0213_Clostridium_perfringens_28_397	0520A	1.63945	5.26208
0528Y_Escherichia_coli_51_14	0528Y	1.65142	22.1507
0522A0213_Clostridium_perfringens_28_397	0528A	1.65338	22.1477
0511A0202_Pseudomonas_aeruginosa_66_19	0514A	1.68129	46.1476
0519A0210_Enterococcus_faecalis_37_406	0522W	1.68151	7.90909
0119A1024_Clostridium_difficile_29_11	0117A	1.6955	5.61101
0514Y_Staphylococcus_epidermidis_32_9	0514Y	1.70299	14.4752
0511A0202_Pseudomonas_aeruginosa_66_19	0514Y	1.72609	81.8032
0125A1030_Klebsiella_pneu_56_47	0125A	1.72766	40.4796
0527A0218_Serratia_marcescens_60_106	0528Y	1.75979	7.11012
0528Y_Escherichia_coli_51_14	0514Y	1.78361	191.43
0522A0213_Clostridium_perfringens_28_397	0518A	1.81082	14.5654
0123A_Citrobacter_koseri_6	0106Y	1.84368	617.844
0123A_Citrobacter_koseri_6	0106W	1.85133	73.131
0123A_Citrobacter_koseri_6	0123W	1.88975	259.566
0522A0213_Clostridium_perfringens_28_397	0526A	1.91665	25.6728
0525A0216_Klebsiella_pneumoniae_57_51	0514Y	1.96881	18.2748
0522A0213_Clostridium_perfringens_28_397	0527A	1.97233	71.7538
0119A1024_Clostridium_difficile_29_11	0124A	1.98436	9.93738
0123W_Streptococcus_mitis_40_11	0123Y	2.02306	6.30411
0123W_Streptococcus_mitis_40_11	0123W	2.05919	18.6071
0511A0202_Pseudomonas_aeruginosa_66_19	0512W	2.06221	25.2166
0522A0213_Clostridium_perfringens_28_397	0519A	2.06816	5.89637
0525A0216_Klebsiella_pneumoniae_57_51	0512W	2.10942	5.03326
0528Y_Escherichia_coli_51_14	0512W	2.22019	49.4341
0528Y_Escherichia_coli_51_14	0522W	2.27405	12.0149
0511A0202_Pseudomonas_aeruginosa_66_19	0522W	2.35264	6.22267
