# Supplementary material for: Identical bacterial populations colonize premature infant gut, skin, and oral microbiomes and exhibit different in situ growth rates
Source: Genome Res. 2017 Apr;27(4):601–12. doi: 10.1101/gr.213256.116 (PMC5378178; doi:10.1101/gr.213256.116)
Supplement: Supplemental Material [file supp_gr.213256.116_Supplemental_Table_S9.xlsx]

## Sheet: Cohorts
cohort 1	CitroK_0123A_6:1022686	CitroK_0123A_6:1500928	CitroK_0123A_6:1651539	CitroK_0123A_6:1651542	CitroK_0123A_6:1651547	CitroK_0123A_6:1651556	CitroK_0123A_6:1801661	CitroK_0123A_6:1866408	CitroK_0123A_6:1866413	CitroK_0123A_6:190549	CitroK_0123A_6:190554	CitroK_0123A_6:1924075	CitroK_0123A_6:2046863	CitroK_0123A_6:2345916	CitroK_0123A_6:2430684	CitroK_0123A_6:2430693	CitroK_0123A_6:2601814	CitroK_0123A_6:2619681	CitroK_0123A_6:2914064	CitroK_0123A_6:294115	CitroK_0123A_6:2996123	CitroK_0123A_6:3322844	CitroK_0123A_6:3814993	CitroK_0123A_6:3814997	CitroK_0123A_6:4018849	CitroK_0123A_6:4191568	CitroK_0123A_6:454543	CitroK_0123A_6:814575	CitroK_0123A_6:993261
cohort 2	CitroK_0123A_6:1891859	CitroK_0123A_6:1892072	CitroK_0123A_6:367131	CitroK_0123A_6:4644198	CitroK_0123A_6:4644205	CitroK_0123A_6:4644208	CitroK_0123A_6:4644210	CitroK_0123A_6:4644337
cohort 3	CitroK_0123A_6:367302	CitroK_0123A_6:367311	CitroK_0123A_6:367316
cohort 4	CitroK_0123A_6:1371427	CitroK_0123A_6:1371444
cohort 5	CitroK_0123A_6:2046849
cohort 6	CitroK_0123A_6:3990681
cohort 7	CitroK_0123A_6:253313
cohort 8	CitroK_0123A_6:2121068
cohort 9	CitroK_0123A_6:367130

## Sheet: Raw_variants
key	pileup	ref_count	var_count	cov	ref	var
CitroK_0123A_6:743691	Inf1_ListDelta.fasta-vs-0123W.mpileup	225	0	225	T	A
CitroK_0123A_6:743691	Inf1_ListDelta.fasta-vs-0123Y.mpileup	280	0	280	T	A
CitroK_0123A_6:743691	Inf1_ListDelta.fasta-vs-0116A.mpileup	690	1	691	T	A
CitroK_0123A_6:743691	Inf1_ListDelta.fasta-vs-0110A.mpileup	609	0	609	T	A
CitroK_0123A_6:743691	Inf1_ListDelta.fasta-vs-0113A.mpileup	790	0	791	T	A
CitroK_0123A_6:743691	Inf1_ListDelta.fasta-vs-0120A.mpileup	610	0	611	T	A
CitroK_0123A_6:743691	Inf1_ListDelta.fasta-vs-0111A.mpileup	575	0	575	T	A
CitroK_0123A_6:743691	Inf1_ListDelta.fasta-vs-0114A.mpileup	675	0	675	T	A
CitroK_0123A_6:743691	Inf1_ListDelta.fasta-vs-0117A.mpileup	415	0	416	T	A
CitroK_0123A_6:743691	Inf1_ListDelta.fasta-vs-0123A.mpileup	450	0	452	T	A
CitroK_0123A_6:743691	Inf1_ListDelta.fasta-vs-0126A.mpileup	484	0	485	T	A
CitroK_0123A_6:743691	Inf1_ListDelta.fasta-vs-0118A.mpileup	399	0	399	T	A
CitroK_0123A_6:743691	Inf1_ListDelta.fasta-vs-0124A.mpileup	467	0	467	T	A
CitroK_0123A_6:743691	Inf1_ListDelta.fasta-vs-0106W.mpileup	78	0	78	T	A
CitroK_0123A_6:743691	Inf1_ListDelta.fasta-vs-0112A.mpileup	738	0	738	T	A
CitroK_0123A_6:743691	Inf1_ListDelta.fasta-vs-0125A.mpileup	503	1	508	T	A
CitroK_0123A_6:743691	Inf1_ListDelta.fasta-vs-0127A.mpileup	205	0	215	T	A
CitroK_0123A_6:743691	Inf1_ListDelta.fasta-vs-0106Y.mpileup	509	0	509	T	A
CitroK_0123A_6:743691	Inf1_ListDelta.fasta-vs-0115A.mpileup	498	0	498	T	A
CitroK_0123A_6:743691	Inf1_ListDelta.fasta-vs-0119A.mpileup	545	0	546	T	A
CitroK_0123A_6:743691	Inf1_ListDelta.fasta-vs-0121A.mpileup	488	0	488	T	A
CitroK_0123A_6:2696592	Inf1_ListDelta.fasta-vs-0123W.mpileup	266	0	266	T	A
CitroK_0123A_6:2696592	Inf1_ListDelta.fasta-vs-0123Y.mpileup	325	0	325	T	A
CitroK_0123A_6:2696592	Inf1_ListDelta.fasta-vs-0116A.mpileup	835	0	836	T	A
CitroK_0123A_6:2696592	Inf1_ListDelta.fasta-vs-0110A.mpileup	696	0	696	T	A
CitroK_0123A_6:2696592	Inf1_ListDelta.fasta-vs-0113A.mpileup	890	1	891	T	A
CitroK_0123A_6:2696592	Inf1_ListDelta.fasta-vs-0120A.mpileup	726	1	727	T	A
CitroK_0123A_6:2696592	Inf1_ListDelta.fasta-vs-0111A.mpileup	790	0	790	T	A
CitroK_0123A_6:2696592	Inf1_ListDelta.fasta-vs-0114A.mpileup	794	0	795	T	A
CitroK_0123A_6:2696592	Inf1_ListDelta.fasta-vs-0117A.mpileup	517	1	518	T	A
CitroK_0123A_6:2696592	Inf1_ListDelta.fasta-vs-0123A.mpileup	477	0	477	T	A
CitroK_0123A_6:2696592	Inf1_ListDelta.fasta-vs-0126A.mpileup	573	1	610	T	A
CitroK_0123A_6:2696592	Inf1_ListDelta.fasta-vs-0118A.mpileup	484	0	484	T	A
CitroK_0123A_6:2696592	Inf1_ListDelta.fasta-vs-0124A.mpileup	647	0	648	T	A
CitroK_0123A_6:2696592	Inf1_ListDelta.fasta-vs-0106W.mpileup	75	0	75	T	A
CitroK_0123A_6:2696592	Inf1_ListDelta.fasta-vs-0112A.mpileup	915	0	915	T	A
CitroK_0123A_6:2696592	Inf1_ListDelta.fasta-vs-0125A.mpileup	593	0	636	T	A
CitroK_0123A_6:2696592	Inf1_ListDelta.fasta-vs-0127A.mpileup	241	0	338	T	A
CitroK_0123A_6:2696592	Inf1_ListDelta.fasta-vs-0106Y.mpileup	752	0	753	T	A
CitroK_0123A_6:2696592	Inf1_ListDelta.fasta-vs-0115A.mpileup	658	0	659	T	A
CitroK_0123A_6:2696592	Inf1_ListDelta.fasta-vs-0119A.mpileup	687	0	687	T	A
CitroK_0123A_6:2696592	Inf1_ListDelta.fasta-vs-0121A.mpileup	629	1	630	T	A
CitroK_0123A_6:1705344	Inf1_ListDelta.fasta-vs-0123W.mpileup	287	0	287	T	C
CitroK_0123A_6:1705344	Inf1_ListDelta.fasta-vs-0123Y.mpileup	317	0	317	T	C
CitroK_0123A_6:1705344	Inf1_ListDelta.fasta-vs-0116A.mpileup	821	0	822	T	C
CitroK_0123A_6:1705344	Inf1_ListDelta.fasta-vs-0110A.mpileup	642	1	643	T	C
CitroK_0123A_6:1705344	Inf1_ListDelta.fasta-vs-0113A.mpileup	776	0	777	T	C
CitroK_0123A_6:1705344	Inf1_ListDelta.fasta-vs-0120A.mpileup	682	0	682	T	C
CitroK_0123A_6:1705344	Inf1_ListDelta.fasta-vs-0111A.mpileup	662	0	664	T	C
CitroK_0123A_6:1705344	Inf1_ListDelta.fasta-vs-0114A.mpileup	713	0	714	T	C
CitroK_0123A_6:1705344	Inf1_ListDelta.fasta-vs-0117A.mpileup	444	0	445	T	C
CitroK_0123A_6:1705344	Inf1_ListDelta.fasta-vs-0123A.mpileup	522	0	524	T	C
CitroK_0123A_6:1705344	Inf1_ListDelta.fasta-vs-0126A.mpileup	566	0	571	T	C
CitroK_0123A_6:1705344	Inf1_ListDelta.fasta-vs-0118A.mpileup	445	0	445	T	C
CitroK_0123A_6:1705344	Inf1_ListDelta.fasta-vs-0124A.mpileup	571	0	572	T	C
CitroK_0123A_6:1705344	Inf1_ListDelta.fasta-vs-0106W.mpileup	57	0	57	T	C
CitroK_0123A_6:1705344	Inf1_ListDelta.fasta-vs-0112A.mpileup	938	1	939	T	C
CitroK_0123A_6:1705344	Inf1_ListDelta.fasta-vs-0125A.mpileup	606	0	627	T	C
CitroK_0123A_6:1705344	Inf1_ListDelta.fasta-vs-0127A.mpileup	278	0	311	T	C
CitroK_0123A_6:1705344	Inf1_ListDelta.fasta-vs-0106Y.mpileup	709	0	710	T	C
CitroK_0123A_6:1705344	Inf1_ListDelta.fasta-vs-0115A.mpileup	507	0	508	T	C
CitroK_0123A_6:1705344	Inf1_ListDelta.fasta-vs-0119A.mpileup	559	0	559	T	C
CitroK_0123A_6:1705344	Inf1_ListDelta.fasta-vs-0121A.mpileup	578	1	579	T	C
CitroK_0123A_6:1705921	Inf1_ListDelta.fasta-vs-0123W.mpileup	317	0	317	C	T
CitroK_0123A_6:1705921	Inf1_ListDelta.fasta-vs-0123Y.mpileup	329	1	330	C	T
CitroK_0123A_6:1705921	Inf1_ListDelta.fasta-vs-0116A.mpileup	825	0	825	C	T
CitroK_0123A_6:1705921	Inf1_ListDelta.fasta-vs-0110A.mpileup	704	0	704	C	T
CitroK_0123A_6:1705921	Inf1_ListDelta.fasta-vs-0113A.mpileup	790	3	794	C	T
CitroK_0123A_6:1705921	Inf1_ListDelta.fasta-vs-0120A.mpileup	685	1	686	C	T
CitroK_0123A_6:1705921	Inf1_ListDelta.fasta-vs-0111A.mpileup	580	0	580	C	T
CitroK_0123A_6:1705921	Inf1_ListDelta.fasta-vs-0114A.mpileup	734	1	736	C	T
CitroK_0123A_6:1705921	Inf1_ListDelta.fasta-vs-0117A.mpileup	463	0	463	C	T
CitroK_0123A_6:1705921	Inf1_ListDelta.fasta-vs-0123A.mpileup	554	0	555	C	T
CitroK_0123A_6:1705921	Inf1_ListDelta.fasta-vs-0126A.mpileup	598	1	617	C	T
CitroK_0123A_6:1705921	Inf1_ListDelta.fasta-vs-0118A.mpileup	456	0	456	C	T
CitroK_0123A_6:1705921	Inf1_ListDelta.fasta-vs-0124A.mpileup	607	0	608	C	T
CitroK_0123A_6:1705921	Inf1_ListDelta.fasta-vs-0106W.mpileup	91	1	92	C	T
CitroK_0123A_6:1705921	Inf1_ListDelta.fasta-vs-0112A.mpileup	975	1	977	C	T
CitroK_0123A_6:1705921	Inf1_ListDelta.fasta-vs-0125A.mpileup	663	2	717	C	T
CitroK_0123A_6:1705921	Inf1_ListDelta.fasta-vs-0127A.mpileup	395	0	511	C	T
CitroK_0123A_6:1705921	Inf1_ListDelta.fasta-vs-0106Y.mpileup	708	3	711	C	T
CitroK_0123A_6:1705921	Inf1_ListDelta.fasta-vs-0115A.mpileup	508	1	509	C	T
CitroK_0123A_6:1705921	Inf1_ListDelta.fasta-vs-0119A.mpileup	522	1	525	C	T
CitroK_0123A_6:1705921	Inf1_ListDelta.fasta-vs-0121A.mpileup	526	2	528	C	T
CitroK_0123A_6:1038110	Inf1_ListDelta.fasta-vs-0123W.mpileup	236	0	236	A	G
CitroK_0123A_6:1038110	Inf1_ListDelta.fasta-vs-0123Y.mpileup	269	0	269	A	G
CitroK_0123A_6:1038110	Inf1_ListDelta.fasta-vs-0116A.mpileup	704	1	705	A	G
CitroK_0123A_6:1038110	Inf1_ListDelta.fasta-vs-0110A.mpileup	593	0	593	A	G
CitroK_0123A_6:1038110	Inf1_ListDelta.fasta-vs-0113A.mpileup	714	0	714	A	G
CitroK_0123A_6:1038110	Inf1_ListDelta.fasta-vs-0120A.mpileup	597	0	598	A	G
CitroK_0123A_6:1038110	Inf1_ListDelta.fasta-vs-0111A.mpileup	619	0	620	A	G
CitroK_0123A_6:1038110	Inf1_ListDelta.fasta-vs-0114A.mpileup	675	0	676	A	G
CitroK_0123A_6:1038110	Inf1_ListDelta.fasta-vs-0117A.mpileup	428	0	428	A	G
CitroK_0123A_6:1038110	Inf1_ListDelta.fasta-vs-0123A.mpileup	445	0	446	A	G
CitroK_0123A_6:1038110	Inf1_ListDelta.fasta-vs-0126A.mpileup	478	0	478	A	G
CitroK_0123A_6:1038110	Inf1_ListDelta.fasta-vs-0118A.mpileup	404	0	404	A	G
CitroK_0123A_6:1038110	Inf1_ListDelta.fasta-vs-0124A.mpileup	491	0	493	A	G
CitroK_0123A_6:1038110	Inf1_ListDelta.fasta-vs-0106W.mpileup	41	0	41	A	G
CitroK_0123A_6:1038110	Inf1_ListDelta.fasta-vs-0112A.mpileup	770	2	773	A	G
CitroK_0123A_6:1038110	Inf1_ListDelta.fasta-vs-0125A.mpileup	532	0	533	A	G
CitroK_0123A_6:1038110	Inf1_ListDelta.fasta-vs-0127A.mpileup	189	0	190	A	G
CitroK_0123A_6:1038110	Inf1_ListDelta.fasta-vs-0106Y.mpileup	555	0	556	A	G
CitroK_0123A_6:1038110	Inf1_ListDelta.fasta-vs-0115A.mpileup	465	0	466	A	G
CitroK_0123A_6:1038110	Inf1_ListDelta.fasta-vs-0119A.mpileup	558	0	559	A	G
CitroK_0123A_6:1038110	Inf1_ListDelta.fasta-vs-0121A.mpileup	534	1	535	A	G
CitroK_0123A_6:3412377	Inf1_ListDelta.fasta-vs-0123W.mpileup	118	106	224	T	C
CitroK_0123A_6:3412377	Inf1_ListDelta.fasta-vs-0123Y.mpileup	145	137	282	T	C
CitroK_0123A_6:3412377	Inf1_ListDelta.fasta-vs-0116A.mpileup	319	305	625	T	C
CitroK_0123A_6:3412377	Inf1_ListDelta.fasta-vs-0110A.mpileup	259	233	492	T	C
CitroK_0123A_6:3412377	Inf1_ListDelta.fasta-vs-0113A.mpileup	333	306	639	T	C
CitroK_0123A_6:3412377	Inf1_ListDelta.fasta-vs-0120A.mpileup	288	259	548	T	C
CitroK_0123A_6:3412377	Inf1_ListDelta.fasta-vs-0111A.mpileup	262	237	499	T	C
CitroK_0123A_6:3412377	Inf1_ListDelta.fasta-vs-0114A.mpileup	311	284	596	T	C
CitroK_0123A_6:3412377	Inf1_ListDelta.fasta-vs-0117A.mpileup	201	155	356	T	C
CitroK_0123A_6:3412377	Inf1_ListDelta.fasta-vs-0123A.mpileup	242	180	423	T	C
CitroK_0123A_6:3412377	Inf1_ListDelta.fasta-vs-0126A.mpileup	252	177	429	T	C
CitroK_0123A_6:3412377	Inf1_ListDelta.fasta-vs-0118A.mpileup	204	163	368	T	C
CitroK_0123A_6:3412377	Inf1_ListDelta.fasta-vs-0124A.mpileup	239	185	424	T	C
CitroK_0123A_6:3412377	Inf1_ListDelta.fasta-vs-0106W.mpileup	31	31	62	T	C
CitroK_0123A_6:3412377	Inf1_ListDelta.fasta-vs-0112A.mpileup	388	303	691	T	C
CitroK_0123A_6:3412377	Inf1_ListDelta.fasta-vs-0125A.mpileup	248	257	505	T	C
CitroK_0123A_6:3412377	Inf1_ListDelta.fasta-vs-0127A.mpileup	97	115	212	T	C
CitroK_0123A_6:3412377	Inf1_ListDelta.fasta-vs-0106Y.mpileup	272	235	508	T	C
CitroK_0123A_6:3412377	Inf1_ListDelta.fasta-vs-0115A.mpileup	260	214	476	T	C
CitroK_0123A_6:3412377	Inf1_ListDelta.fasta-vs-0119A.mpileup	226	227	453	T	C
CitroK_0123A_6:3412377	Inf1_ListDelta.fasta-vs-0121A.mpileup	233	197	430	T	C
CitroK_0123A_6:217132	Inf1_ListDelta.fasta-vs-0123W.mpileup	182	0	182	T	A
CitroK_0123A_6:217132	Inf1_ListDelta.fasta-vs-0123Y.mpileup	234	0	234	T	A
CitroK_0123A_6:217132	Inf1_ListDelta.fasta-vs-0116A.mpileup	601	0	603	T	A
CitroK_0123A_6:217132	Inf1_ListDelta.fasta-vs-0110A.mpileup	526	1	528	T	A
CitroK_0123A_6:217132	Inf1_ListDelta.fasta-vs-0113A.mpileup	539	0	539	T	A
CitroK_0123A_6:217132	Inf1_ListDelta.fasta-vs-0120A.mpileup	501	0	501	T	A
CitroK_0123A_6:217132	Inf1_ListDelta.fasta-vs-0111A.mpileup	479	0	481	T	A
CitroK_0123A_6:217132	Inf1_ListDelta.fasta-vs-0114A.mpileup	651	0	652	T	A
CitroK_0123A_6:217132	Inf1_ListDelta.fasta-vs-0117A.mpileup	312	0	313	T	A
CitroK_0123A_6:217132	Inf1_ListDelta.fasta-vs-0123A.mpileup	384	0	384	T	A
CitroK_0123A_6:217132	Inf1_ListDelta.fasta-vs-0126A.mpileup	368	2	372	T	A
CitroK_0123A_6:217132	Inf1_ListDelta.fasta-vs-0118A.mpileup	357	0	358	T	A
CitroK_0123A_6:217132	Inf1_ListDelta.fasta-vs-0124A.mpileup	373	0	374	T	A
CitroK_0123A_6:217132	Inf1_ListDelta.fasta-vs-0106W.mpileup	48	0	48	T	A
CitroK_0123A_6:217132	Inf1_ListDelta.fasta-vs-0112A.mpileup	681	0	682	T	A
CitroK_0123A_6:217132	Inf1_ListDelta.fasta-vs-0125A.mpileup	401	0	402	T	A
CitroK_0123A_6:217132	Inf1_ListDelta.fasta-vs-0127A.mpileup	182	0	183	T	A
CitroK_0123A_6:217132	Inf1_ListDelta.fasta-vs-0106Y.mpileup	458	0	458	T	A
CitroK_0123A_6:217132	Inf1_ListDelta.fasta-vs-0115A.mpileup	370	0	370	T	A
CitroK_0123A_6:217132	Inf1_ListDelta.fasta-vs-0119A.mpileup	440	0	441	T	A
CitroK_0123A_6:217132	Inf1_ListDelta.fasta-vs-0121A.mpileup	396	0	396	T	A
CitroK_0123A_6:3448732	Inf1_ListDelta.fasta-vs-0123W.mpileup	88	0	88	A	C
CitroK_0123A_6:3448732	Inf1_ListDelta.fasta-vs-0123Y.mpileup	105	0	105	A	C
CitroK_0123A_6:3448732	Inf1_ListDelta.fasta-vs-0116A.mpileup	221	0	221	A	C
CitroK_0123A_6:3448732	Inf1_ListDelta.fasta-vs-0110A.mpileup	207	0	208	A	C
CitroK_0123A_6:3448732	Inf1_ListDelta.fasta-vs-0113A.mpileup	279	0	279	A	C
CitroK_0123A_6:3448732	Inf1_ListDelta.fasta-vs-0120A.mpileup	230	0	230	A	C
CitroK_0123A_6:3448732	Inf1_ListDelta.fasta-vs-0111A.mpileup	230	0	230	A	C
CitroK_0123A_6:3448732	Inf1_ListDelta.fasta-vs-0114A.mpileup	237	0	237	A	C
CitroK_0123A_6:3448732	Inf1_ListDelta.fasta-vs-0117A.mpileup	162	0	162	A	C
CitroK_0123A_6:3448732	Inf1_ListDelta.fasta-vs-0123A.mpileup	172	0	172	A	C
CitroK_0123A_6:3448732	Inf1_ListDelta.fasta-vs-0126A.mpileup	156	0	175	A	C
CitroK_0123A_6:3448732	Inf1_ListDelta.fasta-vs-0118A.mpileup	129	0	129	A	C
CitroK_0123A_6:3448732	Inf1_ListDelta.fasta-vs-0124A.mpileup	166	1	167	A	C
CitroK_0123A_6:3448732	Inf1_ListDelta.fasta-vs-0106W.mpileup	23	0	23	A	C
CitroK_0123A_6:3448732	Inf1_ListDelta.fasta-vs-0112A.mpileup	265	0	266	A	C
CitroK_0123A_6:3448732	Inf1_ListDelta.fasta-vs-0125A.mpileup	178	1	225	A	C
CitroK_0123A_6:3448732	Inf1_ListDelta.fasta-vs-0127A.mpileup	84	0	167	A	C
CitroK_0123A_6:3448732	Inf1_ListDelta.fasta-vs-0106Y.mpileup	204	0	204	A	C
CitroK_0123A_6:3448732	Inf1_ListDelta.fasta-vs-0115A.mpileup	176	0	176	A	C
CitroK_0123A_6:3448732	Inf1_ListDelta.fasta-vs-0119A.mpileup	181	0	182	A	C
CitroK_0123A_6:3448732	Inf1_ListDelta.fasta-vs-0121A.mpileup	208	1	209	A	C
CitroK_0123A_6:2816647	Inf1_ListDelta.fasta-vs-0123W.mpileup	286	0	286	T	C
CitroK_0123A_6:2816647	Inf1_ListDelta.fasta-vs-0123Y.mpileup	322	1	323	T	C
CitroK_0123A_6:2816647	Inf1_ListDelta.fasta-vs-0116A.mpileup	757	0	757	T	C
CitroK_0123A_6:2816647	Inf1_ListDelta.fasta-vs-0110A.mpileup	635	0	635	T	C
CitroK_0123A_6:2816647	Inf1_ListDelta.fasta-vs-0113A.mpileup	769	0	769	T	C
CitroK_0123A_6:2816647	Inf1_ListDelta.fasta-vs-0120A.mpileup	641	0	642	T	C
CitroK_0123A_6:2816647	Inf1_ListDelta.fasta-vs-0111A.mpileup	618	1	619	T	C
CitroK_0123A_6:2816647	Inf1_ListDelta.fasta-vs-0114A.mpileup	740	1	741	T	C
CitroK_0123A_6:2816647	Inf1_ListDelta.fasta-vs-0117A.mpileup	402	0	402	T	C
CitroK_0123A_6:2816647	Inf1_ListDelta.fasta-vs-0123A.mpileup	489	0	490	T	C
CitroK_0123A_6:2816647	Inf1_ListDelta.fasta-vs-0126A.mpileup	507	0	508	T	C
CitroK_0123A_6:2816647	Inf1_ListDelta.fasta-vs-0118A.mpileup	424	0	424	T	C
CitroK_0123A_6:2816647	Inf1_ListDelta.fasta-vs-0124A.mpileup	525	0	525	T	C
CitroK_0123A_6:2816647	Inf1_ListDelta.fasta-vs-0106W.mpileup	90	0	90	T	C
CitroK_0123A_6:2816647	Inf1_ListDelta.fasta-vs-0112A.mpileup	863	0	863	T	C
CitroK_0123A_6:2816647	Inf1_ListDelta.fasta-vs-0125A.mpileup	534	0	534	T	C
CitroK_0123A_6:2816647	Inf1_ListDelta.fasta-vs-0127A.mpileup	225	2	227	T	C
CitroK_0123A_6:2816647	Inf1_ListDelta.fasta-vs-0106Y.mpileup	637	1	638	T	C
CitroK_0123A_6:2816647	Inf1_ListDelta.fasta-vs-0115A.mpileup	521	0	521	T	C
CitroK_0123A_6:2816647	Inf1_ListDelta.fasta-vs-0119A.mpileup	583	0	583	T	C
CitroK_0123A_6:2816647	Inf1_ListDelta.fasta-vs-0121A.mpileup	514	2	516	T	C
CitroK_0123A_6:3305541	Inf1_ListDelta.fasta-vs-0123W.mpileup	227	0	227	C	T
CitroK_0123A_6:3305541	Inf1_ListDelta.fasta-vs-0123Y.mpileup	319	0	319	C	T
CitroK_0123A_6:3305541	Inf1_ListDelta.fasta-vs-0116A.mpileup	604	0	604	C	T
CitroK_0123A_6:3305541	Inf1_ListDelta.fasta-vs-0110A.mpileup	459	0	459	C	T
CitroK_0123A_6:3305541	Inf1_ListDelta.fasta-vs-0113A.mpileup	581	0	581	C	T
CitroK_0123A_6:3305541	Inf1_ListDelta.fasta-vs-0120A.mpileup	495	0	496	C	T
CitroK_0123A_6:3305541	Inf1_ListDelta.fasta-vs-0111A.mpileup	471	0	473	C	T
CitroK_0123A_6:3305541	Inf1_ListDelta.fasta-vs-0114A.mpileup	551	0	553	C	T
CitroK_0123A_6:3305541	Inf1_ListDelta.fasta-vs-0117A.mpileup	320	1	321	C	T
CitroK_0123A_6:3305541	Inf1_ListDelta.fasta-vs-0123A.mpileup	438	1	440	C	T
CitroK_0123A_6:3305541	Inf1_ListDelta.fasta-vs-0126A.mpileup	547	1	548	C	T
CitroK_0123A_6:3305541	Inf1_ListDelta.fasta-vs-0118A.mpileup	335	1	337	C	T
CitroK_0123A_6:3305541	Inf1_ListDelta.fasta-vs-0124A.mpileup	527	0	529	C	T
CitroK_0123A_6:3305541	Inf1_ListDelta.fasta-vs-0106W.mpileup	83	0	83	C	T
CitroK_0123A_6:3305541	Inf1_ListDelta.fasta-vs-0112A.mpileup	647	0	648	C	T
CitroK_0123A_6:3305541	Inf1_ListDelta.fasta-vs-0125A.mpileup	518	0	518	C	T
CitroK_0123A_6:3305541	Inf1_ListDelta.fasta-vs-0127A.mpileup	212	0	212	C	T
CitroK_0123A_6:3305541	Inf1_ListDelta.fasta-vs-0106Y.mpileup	591	0	592	C	T
CitroK_0123A_6:3305541	Inf1_ListDelta.fasta-vs-0115A.mpileup	384	0	384	C	T
CitroK_0123A_6:3305541	Inf1_ListDelta.fasta-vs-0119A.mpileup	485	0	485	C	T
CitroK_0123A_6:3305541	Inf1_ListDelta.fasta-vs-0121A.mpileup	421	1	422	C	T
CitroK_0123A_6:1983857	Inf1_ListDelta.fasta-vs-0123W.mpileup	310	0	310	G	A
CitroK_0123A_6:1983857	Inf1_ListDelta.fasta-vs-0123Y.mpileup	341	0	341	G	A
CitroK_0123A_6:1983857	Inf1_ListDelta.fasta-vs-0116A.mpileup	697	0	697	G	A
CitroK_0123A_6:1983857	Inf1_ListDelta.fasta-vs-0110A.mpileup	524	0	524	G	A
CitroK_0123A_6:1983857	Inf1_ListDelta.fasta-vs-0113A.mpileup	615	0	617	G	A
CitroK_0123A_6:1983857	Inf1_ListDelta.fasta-vs-0120A.mpileup	581	1	582	G	A
CitroK_0123A_6:1983857	Inf1_ListDelta.fasta-vs-0111A.mpileup	550	1	552	G	A
CitroK_0123A_6:1983857	Inf1_ListDelta.fasta-vs-0114A.mpileup	642	0	643	G	A
CitroK_0123A_6:1983857	Inf1_ListDelta.fasta-vs-0117A.mpileup	352	1	353	G	A
CitroK_0123A_6:1983857	Inf1_ListDelta.fasta-vs-0123A.mpileup	517	1	518	G	A
CitroK_0123A_6:1983857	Inf1_ListDelta.fasta-vs-0126A.mpileup	522	23	546	G	A
CitroK_0123A_6:1983857	Inf1_ListDelta.fasta-vs-0118A.mpileup	405	0	405	G	A
CitroK_0123A_6:1983857	Inf1_ListDelta.fasta-vs-0124A.mpileup	545	1	546	G	A
CitroK_0123A_6:1983857	Inf1_ListDelta.fasta-vs-0106W.mpileup	85	0	85	G	A
CitroK_0123A_6:1983857	Inf1_ListDelta.fasta-vs-0112A.mpileup	749	0	749	G	A
CitroK_0123A_6:1983857	Inf1_ListDelta.fasta-vs-0125A.mpileup	554	66	621	G	A
CitroK_0123A_6:1983857	Inf1_ListDelta.fasta-vs-0127A.mpileup	277	155	432	G	A
CitroK_0123A_6:1983857	Inf1_ListDelta.fasta-vs-0106Y.mpileup	745	2	747	G	A
CitroK_0123A_6:1983857	Inf1_ListDelta.fasta-vs-0115A.mpileup	428	0	428	G	A
CitroK_0123A_6:1983857	Inf1_ListDelta.fasta-vs-0119A.mpileup	513	0	513	G	A
CitroK_0123A_6:1983857	Inf1_ListDelta.fasta-vs-0121A.mpileup	444	0	444	G	A
CitroK_0123A_6:2900073	Inf1_ListDelta.fasta-vs-0123W.mpileup	286	0	288	T	A
CitroK_0123A_6:2900073	Inf1_ListDelta.fasta-vs-0123Y.mpileup	335	0	336	T	A
CitroK_0123A_6:2900073	Inf1_ListDelta.fasta-vs-0116A.mpileup	779	0	781	T	A
CitroK_0123A_6:2900073	Inf1_ListDelta.fasta-vs-0110A.mpileup	610	0	612	T	A
CitroK_0123A_6:2900073	Inf1_ListDelta.fasta-vs-0113A.mpileup	808	0	809	T	A
CitroK_0123A_6:2900073	Inf1_ListDelta.fasta-vs-0120A.mpileup	635	0	636	T	A
CitroK_0123A_6:2900073	Inf1_ListDelta.fasta-vs-0111A.mpileup	661	0	661	T	A
CitroK_0123A_6:2900073	Inf1_ListDelta.fasta-vs-0114A.mpileup	737	0	737	T	A
CitroK_0123A_6:2900073	Inf1_ListDelta.fasta-vs-0117A.mpileup	430	0	431	T	A
CitroK_0123A_6:2900073	Inf1_ListDelta.fasta-vs-0123A.mpileup	483	0	483	T	A
CitroK_0123A_6:2900073	Inf1_ListDelta.fasta-vs-0126A.mpileup	541	0	543	T	A
CitroK_0123A_6:2900073	Inf1_ListDelta.fasta-vs-0118A.mpileup	438	0	438	T	A
CitroK_0123A_6:2900073	Inf1_ListDelta.fasta-vs-0124A.mpileup	505	0	507	T	A
CitroK_0123A_6:2900073	Inf1_ListDelta.fasta-vs-0106W.mpileup	49	0	49	T	A
CitroK_0123A_6:2900073	Inf1_ListDelta.fasta-vs-0112A.mpileup	818	1	819	T	A
CitroK_0123A_6:2900073	Inf1_ListDelta.fasta-vs-0125A.mpileup	531	0	533	T	A
CitroK_0123A_6:2900073	Inf1_ListDelta.fasta-vs-0127A.mpileup	258	0	258	T	A
CitroK_0123A_6:2900073	Inf1_ListDelta.fasta-vs-0106Y.mpileup	635	1	637	T	A
CitroK_0123A_6:2900073	Inf1_ListDelta.fasta-vs-0115A.mpileup	470	1	471	T	A
CitroK_0123A_6:2900073	Inf1_ListDelta.fasta-vs-0119A.mpileup	637	0	639	T	A
CitroK_0123A_6:2900073	Inf1_ListDelta.fasta-vs-0121A.mpileup	547	1	548	T	A
CitroK_0123A_6:1308598	Inf1_ListDelta.fasta-vs-0123W.mpileup	270	0	270	C	G
CitroK_0123A_6:1308598	Inf1_ListDelta.fasta-vs-0123Y.mpileup	339	0	339	C	G
CitroK_0123A_6:1308598	Inf1_ListDelta.fasta-vs-0116A.mpileup	781	0	782	C	G
CitroK_0123A_6:1308598	Inf1_ListDelta.fasta-vs-0110A.mpileup	629	1	630	C	G
CitroK_0123A_6:1308598	Inf1_ListDelta.fasta-vs-0113A.mpileup	803	0	803	C	G
CitroK_0123A_6:1308598	Inf1_ListDelta.fasta-vs-0120A.mpileup	620	0	620	C	G
CitroK_0123A_6:1308598	Inf1_ListDelta.fasta-vs-0111A.mpileup	631	0	632	C	G
CitroK_0123A_6:1308598	Inf1_ListDelta.fasta-vs-0114A.mpileup	705	0	705	C	G
CitroK_0123A_6:1308598	Inf1_ListDelta.fasta-vs-0117A.mpileup	445	0	445	C	G
CitroK_0123A_6:1308598	Inf1_ListDelta.fasta-vs-0123A.mpileup	533	0	533	C	G
CitroK_0123A_6:1308598	Inf1_ListDelta.fasta-vs-0126A.mpileup	571	0	571	C	G
CitroK_0123A_6:1308598	Inf1_ListDelta.fasta-vs-0118A.mpileup	415	0	415	C	G
CitroK_0123A_6:1308598	Inf1_ListDelta.fasta-vs-0124A.mpileup	538	0	539	C	G
CitroK_0123A_6:1308598	Inf1_ListDelta.fasta-vs-0106W.mpileup	95	0	95	C	G
CitroK_0123A_6:1308598	Inf1_ListDelta.fasta-vs-0112A.mpileup	812	0	813	C	G
CitroK_0123A_6:1308598	Inf1_ListDelta.fasta-vs-0125A.mpileup	546	0	546	C	G
CitroK_0123A_6:1308598	Inf1_ListDelta.fasta-vs-0127A.mpileup	226	0	228	C	G
CitroK_0123A_6:1308598	Inf1_ListDelta.fasta-vs-0106Y.mpileup	690	1	691	C	G
CitroK_0123A_6:1308598	Inf1_ListDelta.fasta-vs-0115A.mpileup	564	0	565	C	G
CitroK_0123A_6:1308598	Inf1_ListDelta.fasta-vs-0119A.mpileup	557	0	557	C	G
CitroK_0123A_6:1308598	Inf1_ListDelta.fasta-vs-0121A.mpileup	572	1	573	C	G
CitroK_0123A_6:1373216	Inf1_ListDelta.fasta-vs-0123W.mpileup	247	0	247	A	T
CitroK_0123A_6:1373216	Inf1_ListDelta.fasta-vs-0123Y.mpileup	318	0	318	A	T
CitroK_0123A_6:1373216	Inf1_ListDelta.fasta-vs-0116A.mpileup	729	1	731	A	T
CitroK_0123A_6:1373216	Inf1_ListDelta.fasta-vs-0110A.mpileup	644	1	645	A	T
CitroK_0123A_6:1373216	Inf1_ListDelta.fasta-vs-0113A.mpileup	699	1	701	A	T
CitroK_0123A_6:1373216	Inf1_ListDelta.fasta-vs-0120A.mpileup	632	0	632	A	T
CitroK_0123A_6:1373216	Inf1_ListDelta.fasta-vs-0111A.mpileup	563	1	565	A	T
CitroK_0123A_6:1373216	Inf1_ListDelta.fasta-vs-0114A.mpileup	721	3	724	A	T
CitroK_0123A_6:1373216	Inf1_ListDelta.fasta-vs-0117A.mpileup	364	0	364	A	T
CitroK_0123A_6:1373216	Inf1_ListDelta.fasta-vs-0123A.mpileup	481	0	481	A	T
CitroK_0123A_6:1373216	Inf1_ListDelta.fasta-vs-0126A.mpileup	515	0	516	A	T
CitroK_0123A_6:1373216	Inf1_ListDelta.fasta-vs-0118A.mpileup	405	0	405	A	T
CitroK_0123A_6:1373216	Inf1_ListDelta.fasta-vs-0124A.mpileup	486	0	487	A	T
CitroK_0123A_6:1373216	Inf1_ListDelta.fasta-vs-0106W.mpileup	75	0	76	A	T
CitroK_0123A_6:1373216	Inf1_ListDelta.fasta-vs-0112A.mpileup	763	0	763	A	T
CitroK_0123A_6:1373216	Inf1_ListDelta.fasta-vs-0125A.mpileup	505	1	507	A	T
CitroK_0123A_6:1373216	Inf1_ListDelta.fasta-vs-0127A.mpileup	238	0	240	A	T
CitroK_0123A_6:1373216	Inf1_ListDelta.fasta-vs-0106Y.mpileup	641	1	643	A	T
CitroK_0123A_6:1373216	Inf1_ListDelta.fasta-vs-0115A.mpileup	429	0	431	A	T
CitroK_0123A_6:1373216	Inf1_ListDelta.fasta-vs-0119A.mpileup	533	3	537	A	T
CitroK_0123A_6:1373216	Inf1_ListDelta.fasta-vs-0121A.mpileup	516	2	519	A	T
CitroK_0123A_6:2697503	Inf1_ListDelta.fasta-vs-0123W.mpileup	303	1	305	G	A
CitroK_0123A_6:2697503	Inf1_ListDelta.fasta-vs-0123Y.mpileup	316	0	316	G	A
CitroK_0123A_6:2697503	Inf1_ListDelta.fasta-vs-0116A.mpileup	817	1	818	G	A
CitroK_0123A_6:2697503	Inf1_ListDelta.fasta-vs-0110A.mpileup	670	3	674	G	A
CitroK_0123A_6:2697503	Inf1_ListDelta.fasta-vs-0113A.mpileup	879	2	881	G	A
CitroK_0123A_6:2697503	Inf1_ListDelta.fasta-vs-0120A.mpileup	677	0	678	G	A
CitroK_0123A_6:2697503	Inf1_ListDelta.fasta-vs-0111A.mpileup	698	2	701	G	A
CitroK_0123A_6:2697503	Inf1_ListDelta.fasta-vs-0114A.mpileup	746	0	746	G	A
CitroK_0123A_6:2697503	Inf1_ListDelta.fasta-vs-0117A.mpileup	445	0	445	G	A
CitroK_0123A_6:2697503	Inf1_ListDelta.fasta-vs-0123A.mpileup	528	1	529	G	A
CitroK_0123A_6:2697503	Inf1_ListDelta.fasta-vs-0126A.mpileup	540	1	558	G	A
CitroK_0123A_6:2697503	Inf1_ListDelta.fasta-vs-0118A.mpileup	458	0	459	G	A
CitroK_0123A_6:2697503	Inf1_ListDelta.fasta-vs-0124A.mpileup	586	1	588	G	A
CitroK_0123A_6:2697503	Inf1_ListDelta.fasta-vs-0106W.mpileup	102	0	102	G	A
CitroK_0123A_6:2697503	Inf1_ListDelta.fasta-vs-0112A.mpileup	869	0	869	G	A
CitroK_0123A_6:2697503	Inf1_ListDelta.fasta-vs-0125A.mpileup	624	1	670	G	A
CitroK_0123A_6:2697503	Inf1_ListDelta.fasta-vs-0127A.mpileup	272	0	396	G	A
CitroK_0123A_6:2697503	Inf1_ListDelta.fasta-vs-0106Y.mpileup	775	0	775	G	A
CitroK_0123A_6:2697503	Inf1_ListDelta.fasta-vs-0115A.mpileup	604	1	605	G	A
CitroK_0123A_6:2697503	Inf1_ListDelta.fasta-vs-0119A.mpileup	617	1	618	G	A
CitroK_0123A_6:2697503	Inf1_ListDelta.fasta-vs-0121A.mpileup	522	0	522	G	A
CitroK_0123A_6:2820953	Inf1_ListDelta.fasta-vs-0123W.mpileup	313	0	313	C	A
CitroK_0123A_6:2820953	Inf1_ListDelta.fasta-vs-0123Y.mpileup	313	0	313	C	A
CitroK_0123A_6:2820953	Inf1_ListDelta.fasta-vs-0116A.mpileup	754	0	755	C	A
CitroK_0123A_6:2820953	Inf1_ListDelta.fasta-vs-0110A.mpileup	641	0	641	C	A
CitroK_0123A_6:2820953	Inf1_ListDelta.fasta-vs-0113A.mpileup	787	0	789	C	A
CitroK_0123A_6:2820953	Inf1_ListDelta.fasta-vs-0120A.mpileup	594	0	594	C	A
CitroK_0123A_6:2820953	Inf1_ListDelta.fasta-vs-0111A.mpileup	647	0	647	C	A
CitroK_0123A_6:2820953	Inf1_ListDelta.fasta-vs-0114A.mpileup	702	1	704	C	A
CitroK_0123A_6:2820953	Inf1_ListDelta.fasta-vs-0117A.mpileup	460	0	460	C	A
CitroK_0123A_6:2820953	Inf1_ListDelta.fasta-vs-0123A.mpileup	442	0	442	C	A
CitroK_0123A_6:2820953	Inf1_ListDelta.fasta-vs-0126A.mpileup	527	1	528	C	A
CitroK_0123A_6:2820953	Inf1_ListDelta.fasta-vs-0118A.mpileup	458	1	459	C	A
CitroK_0123A_6:2820953	Inf1_ListDelta.fasta-vs-0124A.mpileup	508	0	509	C	A
CitroK_0123A_6:2820953	Inf1_ListDelta.fasta-vs-0106W.mpileup	71	0	71	C	A
CitroK_0123A_6:2820953	Inf1_ListDelta.fasta-vs-0112A.mpileup	844	0	844	C	A
CitroK_0123A_6:2820953	Inf1_ListDelta.fasta-vs-0125A.mpileup	587	0	588	C	A
CitroK_0123A_6:2820953	Inf1_ListDelta.fasta-vs-0127A.mpileup	215	0	216	C	A
CitroK_0123A_6:2820953	Inf1_ListDelta.fasta-vs-0106Y.mpileup	718	1	719	C	A
CitroK_0123A_6:2820953	Inf1_ListDelta.fasta-vs-0115A.mpileup	498	0	498	C	A
CitroK_0123A_6:2820953	Inf1_ListDelta.fasta-vs-0119A.mpileup	630	0	631	C	A
CitroK_0123A_6:2820953	Inf1_ListDelta.fasta-vs-0121A.mpileup	527	0	527	C	A
CitroK_0123A_6:1272939	Inf1_ListDelta.fasta-vs-0123W.mpileup	3	1	4	C	A
CitroK_0123A_6:1272939	Inf1_ListDelta.fasta-vs-0123Y.mpileup	5	0	5	C	A
CitroK_0123A_6:1272939	Inf1_ListDelta.fasta-vs-0116A.mpileup	15	0	15	C	A
CitroK_0123A_6:1272939	Inf1_ListDelta.fasta-vs-0110A.mpileup	16	0	16	C	A
CitroK_0123A_6:1272939	Inf1_ListDelta.fasta-vs-0113A.mpileup	15	0	15	C	A
CitroK_0123A_6:1272939	Inf1_ListDelta.fasta-vs-0120A.mpileup	14	0	14	C	A
CitroK_0123A_6:1272939	Inf1_ListDelta.fasta-vs-0111A.mpileup	7	0	7	C	A
CitroK_0123A_6:1272939	Inf1_ListDelta.fasta-vs-0114A.mpileup	21	0	21	C	A
CitroK_0123A_6:1272939	Inf1_ListDelta.fasta-vs-0117A.mpileup	6	0	6	C	A
CitroK_0123A_6:1272939	Inf1_ListDelta.fasta-vs-0123A.mpileup	5	0	5	C	A
CitroK_0123A_6:1272939	Inf1_ListDelta.fasta-vs-0126A.mpileup	99	0	163	C	A
CitroK_0123A_6:1272939	Inf1_ListDelta.fasta-vs-0118A.mpileup	11	0	11	C	A
CitroK_0123A_6:1272939	Inf1_ListDelta.fasta-vs-0124A.mpileup	10	0	11	C	A
CitroK_0123A_6:1272939	Inf1_ListDelta.fasta-vs-0106W.mpileup	1	0	1	C	A
CitroK_0123A_6:1272939	Inf1_ListDelta.fasta-vs-0112A.mpileup	18	0	18	C	A
CitroK_0123A_6:1272939	Inf1_ListDelta.fasta-vs-0125A.mpileup	216	0	329	C	A
CitroK_0123A_6:1272939	Inf1_ListDelta.fasta-vs-0127A.mpileup	489	0	730	C	A
CitroK_0123A_6:1272939	Inf1_ListDelta.fasta-vs-0106Y.mpileup	16	0	16	C	A
CitroK_0123A_6:1272939	Inf1_ListDelta.fasta-vs-0115A.mpileup	10	0	10	C	A
CitroK_0123A_6:1272939	Inf1_ListDelta.fasta-vs-0119A.mpileup	10	0	10	C	A
CitroK_0123A_6:1272939	Inf1_ListDelta.fasta-vs-0121A.mpileup	10	0	10	C	A
CitroK_0123A_6:2357142	Inf1_ListDelta.fasta-vs-0123W.mpileup	311	0	311	A	G
CitroK_0123A_6:2357142	Inf1_ListDelta.fasta-vs-0123Y.mpileup	394	0	394	A	G
CitroK_0123A_6:2357142	Inf1_ListDelta.fasta-vs-0116A.mpileup	806	0	807	A	G
CitroK_0123A_6:2357142	Inf1_ListDelta.fasta-vs-0110A.mpileup	659	1	660	A	G
CitroK_0123A_6:2357142	Inf1_ListDelta.fasta-vs-0113A.mpileup	850	0	850	A	G
CitroK_0123A_6:2357142	Inf1_ListDelta.fasta-vs-0120A.mpileup	659	0	659	A	G
CitroK_0123A_6:2357142	Inf1_ListDelta.fasta-vs-0111A.mpileup	630	0	630	A	G
CitroK_0123A_6:2357142	Inf1_ListDelta.fasta-vs-0114A.mpileup	722	0	722	A	G
CitroK_0123A_6:2357142	Inf1_ListDelta.fasta-vs-0117A.mpileup	462	0	462	A	G
CitroK_0123A_6:2357142	Inf1_ListDelta.fasta-vs-0123A.mpileup	550	0	550	A	G
CitroK_0123A_6:2357142	Inf1_ListDelta.fasta-vs-0126A.mpileup	595	3	599	A	G
CitroK_0123A_6:2357142	Inf1_ListDelta.fasta-vs-0118A.mpileup	461	0	461	A	G
CitroK_0123A_6:2357142	Inf1_ListDelta.fasta-vs-0124A.mpileup	573	0	573	A	G
CitroK_0123A_6:2357142	Inf1_ListDelta.fasta-vs-0106W.mpileup	89	0	89	A	G
CitroK_0123A_6:2357142	Inf1_ListDelta.fasta-vs-0112A.mpileup	862	0	862	A	G
CitroK_0123A_6:2357142	Inf1_ListDelta.fasta-vs-0125A.mpileup	625	21	646	A	G
CitroK_0123A_6:2357142	Inf1_ListDelta.fasta-vs-0127A.mpileup	254	61	315	A	G
CitroK_0123A_6:2357142	Inf1_ListDelta.fasta-vs-0106Y.mpileup	840	1	842	A	G
CitroK_0123A_6:2357142	Inf1_ListDelta.fasta-vs-0115A.mpileup	573	0	573	A	G
CitroK_0123A_6:2357142	Inf1_ListDelta.fasta-vs-0119A.mpileup	634	0	636	A	G
CitroK_0123A_6:2357142	Inf1_ListDelta.fasta-vs-0121A.mpileup	568	1	569	A	G
CitroK_0123A_6:1953559	Inf1_ListDelta.fasta-vs-0123W.mpileup	78	1	79	G	A
CitroK_0123A_6:1953559	Inf1_ListDelta.fasta-vs-0123Y.mpileup	113	0	113	G	A
CitroK_0123A_6:1953559	Inf1_ListDelta.fasta-vs-0116A.mpileup	187	0	187	G	A
CitroK_0123A_6:1953559	Inf1_ListDelta.fasta-vs-0110A.mpileup	169	0	169	G	A
CitroK_0123A_6:1953559	Inf1_ListDelta.fasta-vs-0113A.mpileup	211	0	212	G	A
CitroK_0123A_6:1953559	Inf1_ListDelta.fasta-vs-0120A.mpileup	164	0	164	G	A
CitroK_0123A_6:1953559	Inf1_ListDelta.fasta-vs-0111A.mpileup	161	0	161	G	A
CitroK_0123A_6:1953559	Inf1_ListDelta.fasta-vs-0114A.mpileup	170	0	170	G	A
CitroK_0123A_6:1953559	Inf1_ListDelta.fasta-vs-0117A.mpileup	119	0	119	G	A
CitroK_0123A_6:1953559	Inf1_ListDelta.fasta-vs-0123A.mpileup	127	0	127	G	A
CitroK_0123A_6:1953559	Inf1_ListDelta.fasta-vs-0126A.mpileup	174	32	206	G	A
CitroK_0123A_6:1953559	Inf1_ListDelta.fasta-vs-0118A.mpileup	92	0	92	G	A
CitroK_0123A_6:1953559	Inf1_ListDelta.fasta-vs-0124A.mpileup	146	0	146	G	A
CitroK_0123A_6:1953559	Inf1_ListDelta.fasta-vs-0106W.mpileup	19	0	19	G	A
CitroK_0123A_6:1953559	Inf1_ListDelta.fasta-vs-0112A.mpileup	194	0	194	G	A
CitroK_0123A_6:1953559	Inf1_ListDelta.fasta-vs-0125A.mpileup	128	58	186	G	A
CitroK_0123A_6:1953559	Inf1_ListDelta.fasta-vs-0127A.mpileup	61	136	197	G	A
CitroK_0123A_6:1953559	Inf1_ListDelta.fasta-vs-0106Y.mpileup	199	0	199	G	A
CitroK_0123A_6:1953559	Inf1_ListDelta.fasta-vs-0115A.mpileup	157	0	157	G	A
CitroK_0123A_6:1953559	Inf1_ListDelta.fasta-vs-0119A.mpileup	188	0	188	G	A
CitroK_0123A_6:1953559	Inf1_ListDelta.fasta-vs-0121A.mpileup	165	0	165	G	A
CitroK_0123A_6:1955363	Inf1_ListDelta.fasta-vs-0123W.mpileup	302	0	302	T	A
CitroK_0123A_6:1955363	Inf1_ListDelta.fasta-vs-0123Y.mpileup	380	0	380	T	A
CitroK_0123A_6:1955363	Inf1_ListDelta.fasta-vs-0116A.mpileup	673	1	674	T	A
CitroK_0123A_6:1955363	Inf1_ListDelta.fasta-vs-0110A.mpileup	585	0	586	T	A
CitroK_0123A_6:1955363	Inf1_ListDelta.fasta-vs-0113A.mpileup	698	0	698	T	A
CitroK_0123A_6:1955363	Inf1_ListDelta.fasta-vs-0120A.mpileup	548	0	550	T	A
CitroK_0123A_6:1955363	Inf1_ListDelta.fasta-vs-0111A.mpileup	591	0	591	T	A
CitroK_0123A_6:1955363	Inf1_ListDelta.fasta-vs-0114A.mpileup	688	1	689	T	A
CitroK_0123A_6:1955363	Inf1_ListDelta.fasta-vs-0117A.mpileup	426	0	427	T	A
CitroK_0123A_6:1955363	Inf1_ListDelta.fasta-vs-0123A.mpileup	473	0	473	T	A
CitroK_0123A_6:1955363	Inf1_ListDelta.fasta-vs-0126A.mpileup	514	0	535	T	A
CitroK_0123A_6:1955363	Inf1_ListDelta.fasta-vs-0118A.mpileup	401	0	401	T	A
CitroK_0123A_6:1955363	Inf1_ListDelta.fasta-vs-0124A.mpileup	580	1	582	T	A
CitroK_0123A_6:1955363	Inf1_ListDelta.fasta-vs-0106W.mpileup	86	0	87	T	A
CitroK_0123A_6:1955363	Inf1_ListDelta.fasta-vs-0112A.mpileup	782	1	783	T	A
CitroK_0123A_6:1955363	Inf1_ListDelta.fasta-vs-0125A.mpileup	548	0	589	T	A
CitroK_0123A_6:1955363	Inf1_ListDelta.fasta-vs-0127A.mpileup	227	0	349	T	A
CitroK_0123A_6:1955363	Inf1_ListDelta.fasta-vs-0106Y.mpileup	806	0	806	T	A
CitroK_0123A_6:1955363	Inf1_ListDelta.fasta-vs-0115A.mpileup	441	0	441	T	A
CitroK_0123A_6:1955363	Inf1_ListDelta.fasta-vs-0119A.mpileup	534	0	535	T	A
CitroK_0123A_6:1955363	Inf1_ListDelta.fasta-vs-0121A.mpileup	508	0	508	T	A
CitroK_0123A_6:1952684	Inf1_ListDelta.fasta-vs-0123W.mpileup	102	0	102	A	G
CitroK_0123A_6:1952684	Inf1_ListDelta.fasta-vs-0123Y.mpileup	150	0	151	A	G
CitroK_0123A_6:1952684	Inf1_ListDelta.fasta-vs-0116A.mpileup	285	0	286	A	G
CitroK_0123A_6:1952684	Inf1_ListDelta.fasta-vs-0110A.mpileup	250	0	251	A	G
CitroK_0123A_6:1952684	Inf1_ListDelta.fasta-vs-0113A.mpileup	327	0	330	A	G
CitroK_0123A_6:1952684	Inf1_ListDelta.fasta-vs-0120A.mpileup	266	0	266	A	G
CitroK_0123A_6:1952684	Inf1_ListDelta.fasta-vs-0111A.mpileup	246	0	249	A	G
CitroK_0123A_6:1952684	Inf1_ListDelta.fasta-vs-0114A.mpileup	248	0	248	A	G
CitroK_0123A_6:1952684	Inf1_ListDelta.fasta-vs-0117A.mpileup	167	0	167	A	G
CitroK_0123A_6:1952684	Inf1_ListDelta.fasta-vs-0123A.mpileup	186	0	188	A	G
CitroK_0123A_6:1952684	Inf1_ListDelta.fasta-vs-0126A.mpileup	295	1	296	A	G
CitroK_0123A_6:1952684	Inf1_ListDelta.fasta-vs-0118A.mpileup	171	0	171	A	G
CitroK_0123A_6:1952684	Inf1_ListDelta.fasta-vs-0124A.mpileup	219	0	219	A	G
CitroK_0123A_6:1952684	Inf1_ListDelta.fasta-vs-0106W.mpileup	38	0	39	A	G
CitroK_0123A_6:1952684	Inf1_ListDelta.fasta-vs-0112A.mpileup	321	0	321	A	G
CitroK_0123A_6:1952684	Inf1_ListDelta.fasta-vs-0125A.mpileup	322	1	323	A	G
CitroK_0123A_6:1952684	Inf1_ListDelta.fasta-vs-0127A.mpileup	371	0	371	A	G
CitroK_0123A_6:1952684	Inf1_ListDelta.fasta-vs-0106Y.mpileup	256	0	256	A	G
CitroK_0123A_6:1952684	Inf1_ListDelta.fasta-vs-0115A.mpileup	210	0	212	A	G
CitroK_0123A_6:1952684	Inf1_ListDelta.fasta-vs-0119A.mpileup	230	0	231	A	G
CitroK_0123A_6:1952684	Inf1_ListDelta.fasta-vs-0121A.mpileup	216	1	218	A	G
CitroK_0123A_6:3449205	Inf1_ListDelta.fasta-vs-0123W.mpileup	106	0	106	G	A
CitroK_0123A_6:3449205	Inf1_ListDelta.fasta-vs-0123Y.mpileup	155	0	156	G	A
CitroK_0123A_6:3449205	Inf1_ListDelta.fasta-vs-0116A.mpileup	233	0	233	G	A
CitroK_0123A_6:3449205	Inf1_ListDelta.fasta-vs-0110A.mpileup	207	0	207	G	A
CitroK_0123A_6:3449205	Inf1_ListDelta.fasta-vs-0113A.mpileup	337	0	337	G	A
CitroK_0123A_6:3449205	Inf1_ListDelta.fasta-vs-0120A.mpileup	218	0	218	G	A
CitroK_0123A_6:3449205	Inf1_ListDelta.fasta-vs-0111A.mpileup	251	0	251	G	A
CitroK_0123A_6:3449205	Inf1_ListDelta.fasta-vs-0114A.mpileup	215	1	216	G	A
CitroK_0123A_6:3449205	Inf1_ListDelta.fasta-vs-0117A.mpileup	170	0	170	G	A
CitroK_0123A_6:3449205	Inf1_ListDelta.fasta-vs-0123A.mpileup	159	1	160	G	A
CitroK_0123A_6:3449205	Inf1_ListDelta.fasta-vs-0126A.mpileup	222	90	312	G	A
CitroK_0123A_6:3449205	Inf1_ListDelta.fasta-vs-0118A.mpileup	135	1	136	G	A
CitroK_0123A_6:3449205	Inf1_ListDelta.fasta-vs-0124A.mpileup	240	0	240	G	A
CitroK_0123A_6:3449205	Inf1_ListDelta.fasta-vs-0106W.mpileup	39	0	39	G	A
CitroK_0123A_6:3449205	Inf1_ListDelta.fasta-vs-0112A.mpileup	247	1	248	G	A
CitroK_0123A_6:3449205	Inf1_ListDelta.fasta-vs-0125A.mpileup	187	126	314	G	A
CitroK_0123A_6:3449205	Inf1_ListDelta.fasta-vs-0127A.mpileup	92	272	364	G	A
CitroK_0123A_6:3449205	Inf1_ListDelta.fasta-vs-0106Y.mpileup	295	0	295	G	A
CitroK_0123A_6:3449205	Inf1_ListDelta.fasta-vs-0115A.mpileup	196	0	196	G	A
CitroK_0123A_6:3449205	Inf1_ListDelta.fasta-vs-0119A.mpileup	264	1	266	G	A
CitroK_0123A_6:3449205	Inf1_ListDelta.fasta-vs-0121A.mpileup	224	1	225	G	A
CitroK_0123A_6:1973934	Inf1_ListDelta.fasta-vs-0123W.mpileup	350	0	351	A	C
CitroK_0123A_6:1973934	Inf1_ListDelta.fasta-vs-0123Y.mpileup	364	0	364	A	C
CitroK_0123A_6:1973934	Inf1_ListDelta.fasta-vs-0116A.mpileup	833	0	834	A	C
CitroK_0123A_6:1973934	Inf1_ListDelta.fasta-vs-0110A.mpileup	702	0	703	A	C
CitroK_0123A_6:1973934	Inf1_ListDelta.fasta-vs-0113A.mpileup	891	0	892	A	C
CitroK_0123A_6:1973934	Inf1_ListDelta.fasta-vs-0120A.mpileup	674	0	674	A	C
CitroK_0123A_6:1973934	Inf1_ListDelta.fasta-vs-0111A.mpileup	677	0	680	A	C
CitroK_0123A_6:1973934	Inf1_ListDelta.fasta-vs-0114A.mpileup	782	0	784	A	C
CitroK_0123A_6:1973934	Inf1_ListDelta.fasta-vs-0117A.mpileup	471	0	472	A	C
CitroK_0123A_6:1973934	Inf1_ListDelta.fasta-vs-0123A.mpileup	564	1	565	A	C
CitroK_0123A_6:1973934	Inf1_ListDelta.fasta-vs-0126A.mpileup	605	0	608	A	C
CitroK_0123A_6:1973934	Inf1_ListDelta.fasta-vs-0118A.mpileup	504	1	505	A	C
CitroK_0123A_6:1973934	Inf1_ListDelta.fasta-vs-0124A.mpileup	620	0	621	A	C
CitroK_0123A_6:1973934	Inf1_ListDelta.fasta-vs-0106W.mpileup	78	0	78	A	C
CitroK_0123A_6:1973934	Inf1_ListDelta.fasta-vs-0112A.mpileup	934	1	936	A	C
CitroK_0123A_6:1973934	Inf1_ListDelta.fasta-vs-0125A.mpileup	581	0	582	A	C
CitroK_0123A_6:1973934	Inf1_ListDelta.fasta-vs-0127A.mpileup	246	0	247	A	C
CitroK_0123A_6:1973934	Inf1_ListDelta.fasta-vs-0106Y.mpileup	876	1	878	A	C
CitroK_0123A_6:1973934	Inf1_ListDelta.fasta-vs-0115A.mpileup	552	0	553	A	C
CitroK_0123A_6:1973934	Inf1_ListDelta.fasta-vs-0119A.mpileup	691	1	693	A	C
CitroK_0123A_6:1973934	Inf1_ListDelta.fasta-vs-0121A.mpileup	613	2	617	A	C
CitroK_0123A_6:3451709	Inf1_ListDelta.fasta-vs-0123W.mpileup	290	12	302	C	T
CitroK_0123A_6:3451709	Inf1_ListDelta.fasta-vs-0123Y.mpileup	342	62	404	C	T
CitroK_0123A_6:3451709	Inf1_ListDelta.fasta-vs-0116A.mpileup	660	0	661	C	T
CitroK_0123A_6:3451709	Inf1_ListDelta.fasta-vs-0110A.mpileup	516	0	517	C	T
CitroK_0123A_6:3451709	Inf1_ListDelta.fasta-vs-0113A.mpileup	748	0	749	C	T
CitroK_0123A_6:3451709	Inf1_ListDelta.fasta-vs-0120A.mpileup	523	0	523	C	T
CitroK_0123A_6:3451709	Inf1_ListDelta.fasta-vs-0111A.mpileup	607	1	608	C	T
CitroK_0123A_6:3451709	Inf1_ListDelta.fasta-vs-0114A.mpileup	612	0	612	C	T
CitroK_0123A_6:3451709	Inf1_ListDelta.fasta-vs-0117A.mpileup	388	0	388	C	T
CitroK_0123A_6:3451709	Inf1_ListDelta.fasta-vs-0123A.mpileup	477	0	478	C	T
CitroK_0123A_6:3451709	Inf1_ListDelta.fasta-vs-0126A.mpileup	541	23	566	C	T
CitroK_0123A_6:3451709	Inf1_ListDelta.fasta-vs-0118A.mpileup	343	1	344	C	T
CitroK_0123A_6:3451709	Inf1_ListDelta.fasta-vs-0124A.mpileup	513	1	515	C	T
CitroK_0123A_6:3451709	Inf1_ListDelta.fasta-vs-0106W.mpileup	70	0	70	C	T
CitroK_0123A_6:3451709	Inf1_ListDelta.fasta-vs-0112A.mpileup	670	0	672	C	T
CitroK_0123A_6:3451709	Inf1_ListDelta.fasta-vs-0125A.mpileup	416	64	481	C	T
CitroK_0123A_6:3451709	Inf1_ListDelta.fasta-vs-0127A.mpileup	237	113	350	C	T
CitroK_0123A_6:3451709	Inf1_ListDelta.fasta-vs-0106Y.mpileup	742	0	742	C	T
CitroK_0123A_6:3451709	Inf1_ListDelta.fasta-vs-0115A.mpileup	471	0	471	C	T
CitroK_0123A_6:3451709	Inf1_ListDelta.fasta-vs-0119A.mpileup	559	0	559	C	T
CitroK_0123A_6:3451709	Inf1_ListDelta.fasta-vs-0121A.mpileup	471	2	473	C	T
CitroK_0123A_6:1974177	Inf1_ListDelta.fasta-vs-0123W.mpileup	374	0	374	A	C
CitroK_0123A_6:1974177	Inf1_ListDelta.fasta-vs-0123Y.mpileup	379	0	379	A	C
CitroK_0123A_6:1974177	Inf1_ListDelta.fasta-vs-0116A.mpileup	817	0	819	A	C
CitroK_0123A_6:1974177	Inf1_ListDelta.fasta-vs-0110A.mpileup	680	1	681	A	C
CitroK_0123A_6:1974177	Inf1_ListDelta.fasta-vs-0113A.mpileup	859	0	859	A	C
CitroK_0123A_6:1974177	Inf1_ListDelta.fasta-vs-0120A.mpileup	703	1	707	A	C
CitroK_0123A_6:1974177	Inf1_ListDelta.fasta-vs-0111A.mpileup	740	0	740	A	C
CitroK_0123A_6:1974177	Inf1_ListDelta.fasta-vs-0114A.mpileup	794	1	795	A	C
CitroK_0123A_6:1974177	Inf1_ListDelta.fasta-vs-0117A.mpileup	463	1	465	A	C
CitroK_0123A_6:1974177	Inf1_ListDelta.fasta-vs-0123A.mpileup	521	3	524	A	C
CitroK_0123A_6:1974177	Inf1_ListDelta.fasta-vs-0126A.mpileup	537	0	539	A	C
CitroK_0123A_6:1974177	Inf1_ListDelta.fasta-vs-0118A.mpileup	447	0	447	A	C
CitroK_0123A_6:1974177	Inf1_ListDelta.fasta-vs-0124A.mpileup	601	0	602	A	C
CitroK_0123A_6:1974177	Inf1_ListDelta.fasta-vs-0106W.mpileup	122	0	122	A	C
CitroK_0123A_6:1974177	Inf1_ListDelta.fasta-vs-0112A.mpileup	959	1	961	A	C
CitroK_0123A_6:1974177	Inf1_ListDelta.fasta-vs-0125A.mpileup	565	0	568	A	C
CitroK_0123A_6:1974177	Inf1_ListDelta.fasta-vs-0127A.mpileup	249	0	264	A	C
CitroK_0123A_6:1974177	Inf1_ListDelta.fasta-vs-0106Y.mpileup	781	0	782	A	C
CitroK_0123A_6:1974177	Inf1_ListDelta.fasta-vs-0115A.mpileup	568	1	571	A	C
CitroK_0123A_6:1974177	Inf1_ListDelta.fasta-vs-0119A.mpileup	654	0	656	A	C
CitroK_0123A_6:1974177	Inf1_ListDelta.fasta-vs-0121A.mpileup	581	3	585	A	C
CitroK_0123A_6:1750901	Inf1_ListDelta.fasta-vs-0123W.mpileup	313	0	313	C	T
CitroK_0123A_6:1750901	Inf1_ListDelta.fasta-vs-0123Y.mpileup	346	1	347	C	T
CitroK_0123A_6:1750901	Inf1_ListDelta.fasta-vs-0116A.mpileup	763	0	763	C	T
CitroK_0123A_6:1750901	Inf1_ListDelta.fasta-vs-0110A.mpileup	650	0	650	C	T
CitroK_0123A_6:1750901	Inf1_ListDelta.fasta-vs-0113A.mpileup	864	0	864	C	T
CitroK_0123A_6:1750901	Inf1_ListDelta.fasta-vs-0120A.mpileup	634	0	635	C	T
CitroK_0123A_6:1750901	Inf1_ListDelta.fasta-vs-0111A.mpileup	726	0	726	C	T
CitroK_0123A_6:1750901	Inf1_ListDelta.fasta-vs-0114A.mpileup	722	0	723	C	T
CitroK_0123A_6:1750901	Inf1_ListDelta.fasta-vs-0117A.mpileup	444	0	444	C	T
CitroK_0123A_6:1750901	Inf1_ListDelta.fasta-vs-0123A.mpileup	539	0	539	C	T
CitroK_0123A_6:1750901	Inf1_ListDelta.fasta-vs-0126A.mpileup	529	0	529	C	T
CitroK_0123A_6:1750901	Inf1_ListDelta.fasta-vs-0118A.mpileup	456	0	456	C	T
CitroK_0123A_6:1750901	Inf1_ListDelta.fasta-vs-0124A.mpileup	559	0	560	C	T
CitroK_0123A_6:1750901	Inf1_ListDelta.fasta-vs-0106W.mpileup	84	0	84	C	T
CitroK_0123A_6:1750901	Inf1_ListDelta.fasta-vs-0112A.mpileup	863	0	865	C	T
CitroK_0123A_6:1750901	Inf1_ListDelta.fasta-vs-0125A.mpileup	561	1	562	C	T
CitroK_0123A_6:1750901	Inf1_ListDelta.fasta-vs-0127A.mpileup	263	0	263	C	T
CitroK_0123A_6:1750901	Inf1_ListDelta.fasta-vs-0106Y.mpileup	717	0	719	C	T
CitroK_0123A_6:1750901	Inf1_ListDelta.fasta-vs-0115A.mpileup	566	1	568	C	T
CitroK_0123A_6:1750901	Inf1_ListDelta.fasta-vs-0119A.mpileup	615	0	616	C	T
CitroK_0123A_6:1750901	Inf1_ListDelta.fasta-vs-0121A.mpileup	581	1	582	C	T
CitroK_0123A_6:4541992	Inf1_ListDelta.fasta-vs-0123W.mpileup	204	0	204	T	A
CitroK_0123A_6:4541992	Inf1_ListDelta.fasta-vs-0123Y.mpileup	259	0	259	T	A
CitroK_0123A_6:4541992	Inf1_ListDelta.fasta-vs-0116A.mpileup	563	0	563	T	A
CitroK_0123A_6:4541992	Inf1_ListDelta.fasta-vs-0110A.mpileup	519	0	519	T	A
CitroK_0123A_6:4541992	Inf1_ListDelta.fasta-vs-0113A.mpileup	586	0	587	T	A
CitroK_0123A_6:4541992	Inf1_ListDelta.fasta-vs-0120A.mpileup	473	0	473	T	A
CitroK_0123A_6:4541992	Inf1_ListDelta.fasta-vs-0111A.mpileup	493	0	493	T	A
CitroK_0123A_6:4541992	Inf1_ListDelta.fasta-vs-0114A.mpileup	511	0	511	T	A
CitroK_0123A_6:4541992	Inf1_ListDelta.fasta-vs-0117A.mpileup	314	0	314	T	A
CitroK_0123A_6:4541992	Inf1_ListDelta.fasta-vs-0123A.mpileup	377	0	377	T	A
CitroK_0123A_6:4541992	Inf1_ListDelta.fasta-vs-0126A.mpileup	405	0	405	T	A
CitroK_0123A_6:4541992	Inf1_ListDelta.fasta-vs-0118A.mpileup	339	0	339	T	A
CitroK_0123A_6:4541992	Inf1_ListDelta.fasta-vs-0124A.mpileup	445	0	445	T	A
CitroK_0123A_6:4541992	Inf1_ListDelta.fasta-vs-0106W.mpileup	78	0	79	T	A
CitroK_0123A_6:4541992	Inf1_ListDelta.fasta-vs-0112A.mpileup	603	0	605	T	A
CitroK_0123A_6:4541992	Inf1_ListDelta.fasta-vs-0125A.mpileup	432	0	434	T	A
CitroK_0123A_6:4541992	Inf1_ListDelta.fasta-vs-0127A.mpileup	156	0	157	T	A
CitroK_0123A_6:4541992	Inf1_ListDelta.fasta-vs-0106Y.mpileup	480	0	480	T	A
CitroK_0123A_6:4541992	Inf1_ListDelta.fasta-vs-0115A.mpileup	392	0	393	T	A
CitroK_0123A_6:4541992	Inf1_ListDelta.fasta-vs-0119A.mpileup	445	1	446	T	A
CitroK_0123A_6:4541992	Inf1_ListDelta.fasta-vs-0121A.mpileup	403	0	403	T	A
CitroK_0123A_6:1277596	Inf1_ListDelta.fasta-vs-0123W.mpileup	172	0	173	A	G
CitroK_0123A_6:1277596	Inf1_ListDelta.fasta-vs-0123Y.mpileup	188	0	188	A	G
CitroK_0123A_6:1277596	Inf1_ListDelta.fasta-vs-0116A.mpileup	463	0	463	A	G
CitroK_0123A_6:1277596	Inf1_ListDelta.fasta-vs-0110A.mpileup	400	0	400	A	G
CitroK_0123A_6:1277596	Inf1_ListDelta.fasta-vs-0113A.mpileup	435	0	435	A	G
CitroK_0123A_6:1277596	Inf1_ListDelta.fasta-vs-0120A.mpileup	387	0	387	A	G
CitroK_0123A_6:1277596	Inf1_ListDelta.fasta-vs-0111A.mpileup	337	0	339	A	G
CitroK_0123A_6:1277596	Inf1_ListDelta.fasta-vs-0114A.mpileup	446	0	446	A	G
CitroK_0123A_6:1277596	Inf1_ListDelta.fasta-vs-0117A.mpileup	217	0	218	A	G
CitroK_0123A_6:1277596	Inf1_ListDelta.fasta-vs-0123A.mpileup	322	0	323	A	G
CitroK_0123A_6:1277596	Inf1_ListDelta.fasta-vs-0126A.mpileup	305	17	322	A	G
CitroK_0123A_6:1277596	Inf1_ListDelta.fasta-vs-0118A.mpileup	296	0	296	A	G
CitroK_0123A_6:1277596	Inf1_ListDelta.fasta-vs-0124A.mpileup	278	0	278	A	G
CitroK_0123A_6:1277596	Inf1_ListDelta.fasta-vs-0106W.mpileup	41	0	41	A	G
CitroK_0123A_6:1277596	Inf1_ListDelta.fasta-vs-0112A.mpileup	521	1	522	A	G
CitroK_0123A_6:1277596	Inf1_ListDelta.fasta-vs-0125A.mpileup	350	21	373	A	G
CitroK_0123A_6:1277596	Inf1_ListDelta.fasta-vs-0127A.mpileup	149	34	183	A	G
CitroK_0123A_6:1277596	Inf1_ListDelta.fasta-vs-0106Y.mpileup	382	0	383	A	G
CitroK_0123A_6:1277596	Inf1_ListDelta.fasta-vs-0115A.mpileup	275	1	276	A	G
CitroK_0123A_6:1277596	Inf1_ListDelta.fasta-vs-0119A.mpileup	315	0	315	A	G
CitroK_0123A_6:1277596	Inf1_ListDelta.fasta-vs-0121A.mpileup	298	1	299	A	G
CitroK_0123A_6:1482037	Inf1_ListDelta.fasta-vs-0123W.mpileup	268	0	269	G	A
CitroK_0123A_6:1482037	Inf1_ListDelta.fasta-vs-0123Y.mpileup	345	0	345	G	A
CitroK_0123A_6:1482037	Inf1_ListDelta.fasta-vs-0116A.mpileup	743	1	744	G	A
CitroK_0123A_6:1482037	Inf1_ListDelta.fasta-vs-0110A.mpileup	640	0	640	G	A
CitroK_0123A_6:1482037	Inf1_ListDelta.fasta-vs-0113A.mpileup	757	0	758	G	A
CitroK_0123A_6:1482037	Inf1_ListDelta.fasta-vs-0120A.mpileup	638	0	640	G	A
CitroK_0123A_6:1482037	Inf1_ListDelta.fasta-vs-0111A.mpileup	633	1	634	G	A
CitroK_0123A_6:1482037	Inf1_ListDelta.fasta-vs-0114A.mpileup	695	0	695	G	A
CitroK_0123A_6:1482037	Inf1_ListDelta.fasta-vs-0117A.mpileup	417	0	417	G	A
CitroK_0123A_6:1482037	Inf1_ListDelta.fasta-vs-0123A.mpileup	494	0	494	G	A
CitroK_0123A_6:1482037	Inf1_ListDelta.fasta-vs-0126A.mpileup	553	0	555	G	A
CitroK_0123A_6:1482037	Inf1_ListDelta.fasta-vs-0118A.mpileup	437	0	438	G	A
CitroK_0123A_6:1482037	Inf1_ListDelta.fasta-vs-0124A.mpileup	483	0	483	G	A
CitroK_0123A_6:1482037	Inf1_ListDelta.fasta-vs-0106W.mpileup	87	0	87	G	A
CitroK_0123A_6:1482037	Inf1_ListDelta.fasta-vs-0112A.mpileup	844	0	845	G	A
CitroK_0123A_6:1482037	Inf1_ListDelta.fasta-vs-0125A.mpileup	562	0	563	G	A
CitroK_0123A_6:1482037	Inf1_ListDelta.fasta-vs-0127A.mpileup	198	0	198	G	A
CitroK_0123A_6:1482037	Inf1_ListDelta.fasta-vs-0106Y.mpileup	630	0	631	G	A
CitroK_0123A_6:1482037	Inf1_ListDelta.fasta-vs-0115A.mpileup	494	0	494	G	A
CitroK_0123A_6:1482037	Inf1_ListDelta.fasta-vs-0119A.mpileup	609	0	609	G	A
CitroK_0123A_6:1482037	Inf1_ListDelta.fasta-vs-0121A.mpileup	544	0	544	G	A
CitroK_0123A_6:4191568	Inf1_ListDelta.fasta-vs-0123W.mpileup	162	0	162	T	G
CitroK_0123A_6:4191568	Inf1_ListDelta.fasta-vs-0123Y.mpileup	242	1	243	T	G
CitroK_0123A_6:4191568	Inf1_ListDelta.fasta-vs-0116A.mpileup	302	123	425	T	G
CitroK_0123A_6:4191568	Inf1_ListDelta.fasta-vs-0110A.mpileup	268	126	394	T	G
CitroK_0123A_6:4191568	Inf1_ListDelta.fasta-vs-0113A.mpileup	405	110	515	T	G
CitroK_0123A_6:4191568	Inf1_ListDelta.fasta-vs-0120A.mpileup	242	102	345	T	G
CitroK_0123A_6:4191568	Inf1_ListDelta.fasta-vs-0111A.mpileup	219	96	315	T	G
CitroK_0123A_6:4191568	Inf1_ListDelta.fasta-vs-0114A.mpileup	277	141	419	T	G
CitroK_0123A_6:4191568	Inf1_ListDelta.fasta-vs-0117A.mpileup	148	53	202	T	G
CitroK_0123A_6:4191568	Inf1_ListDelta.fasta-vs-0123A.mpileup	399	1	400	T	G
CitroK_0123A_6:4191568	Inf1_ListDelta.fasta-vs-0126A.mpileup	416	1	417	T	G
CitroK_0123A_6:4191568	Inf1_ListDelta.fasta-vs-0118A.mpileup	188	68	258	T	G
CitroK_0123A_6:4191568	Inf1_ListDelta.fasta-vs-0124A.mpileup	457	0	457	T	G
CitroK_0123A_6:4191568	Inf1_ListDelta.fasta-vs-0106W.mpileup	44	0	44	T	G
CitroK_0123A_6:4191568	Inf1_ListDelta.fasta-vs-0112A.mpileup	314	148	464	T	G
CitroK_0123A_6:4191568	Inf1_ListDelta.fasta-vs-0125A.mpileup	437	0	437	T	G
CitroK_0123A_6:4191568	Inf1_ListDelta.fasta-vs-0127A.mpileup	198	0	198	T	G
CitroK_0123A_6:4191568	Inf1_ListDelta.fasta-vs-0106Y.mpileup	541	0	541	T	G
CitroK_0123A_6:4191568	Inf1_ListDelta.fasta-vs-0115A.mpileup	208	88	298	T	G
CitroK_0123A_6:4191568	Inf1_ListDelta.fasta-vs-0119A.mpileup	248	83	333	T	G
CitroK_0123A_6:4191568	Inf1_ListDelta.fasta-vs-0121A.mpileup	207	85	292	T	G
CitroK_0123A_6:838250	Inf1_ListDelta.fasta-vs-0123W.mpileup	233	0	233	T	A
CitroK_0123A_6:838250	Inf1_ListDelta.fasta-vs-0123Y.mpileup	291	0	291	T	A
CitroK_0123A_6:838250	Inf1_ListDelta.fasta-vs-0116A.mpileup	533	0	534	T	A
CitroK_0123A_6:838250	Inf1_ListDelta.fasta-vs-0110A.mpileup	483	0	483	T	A
CitroK_0123A_6:838250	Inf1_ListDelta.fasta-vs-0113A.mpileup	522	0	522	T	A
CitroK_0123A_6:838250	Inf1_ListDelta.fasta-vs-0120A.mpileup	449	0	450	T	A
CitroK_0123A_6:838250	Inf1_ListDelta.fasta-vs-0111A.mpileup	381	0	382	T	A
CitroK_0123A_6:838250	Inf1_ListDelta.fasta-vs-0114A.mpileup	501	0	501	T	A
CitroK_0123A_6:838250	Inf1_ListDelta.fasta-vs-0117A.mpileup	240	0	240	T	A
CitroK_0123A_6:838250	Inf1_ListDelta.fasta-vs-0123A.mpileup	396	0	396	T	A
CitroK_0123A_6:838250	Inf1_ListDelta.fasta-vs-0126A.mpileup	418	0	418	T	A
CitroK_0123A_6:838250	Inf1_ListDelta.fasta-vs-0118A.mpileup	312	0	312	T	A
CitroK_0123A_6:838250	Inf1_ListDelta.fasta-vs-0124A.mpileup	463	0	464	T	A
CitroK_0123A_6:838250	Inf1_ListDelta.fasta-vs-0106W.mpileup	69	0	69	T	A
CitroK_0123A_6:838250	Inf1_ListDelta.fasta-vs-0112A.mpileup	606	0	606	T	A
CitroK_0123A_6:838250	Inf1_ListDelta.fasta-vs-0125A.mpileup	505	0	505	T	A
CitroK_0123A_6:838250	Inf1_ListDelta.fasta-vs-0127A.mpileup	228	0	228	T	A
CitroK_0123A_6:838250	Inf1_ListDelta.fasta-vs-0106Y.mpileup	508	0	508	T	A
CitroK_0123A_6:838250	Inf1_ListDelta.fasta-vs-0115A.mpileup	370	1	371	T	A
CitroK_0123A_6:838250	Inf1_ListDelta.fasta-vs-0119A.mpileup	404	0	404	T	A
CitroK_0123A_6:838250	Inf1_ListDelta.fasta-vs-0121A.mpileup	360	0	360	T	A
CitroK_0123A_6:560942	Inf1_ListDelta.fasta-vs-0123W.mpileup	113	98	211	G	A
CitroK_0123A_6:560942	Inf1_ListDelta.fasta-vs-0123Y.mpileup	152	125	277	G	A
CitroK_0123A_6:560942	Inf1_ListDelta.fasta-vs-0116A.mpileup	328	327	657	G	A
CitroK_0123A_6:560942	Inf1_ListDelta.fasta-vs-0110A.mpileup	283	331	614	G	A
CitroK_0123A_6:560942	Inf1_ListDelta.fasta-vs-0113A.mpileup	344	378	724	G	A
CitroK_0123A_6:560942	Inf1_ListDelta.fasta-vs-0120A.mpileup	291	312	604	G	A
CitroK_0123A_6:560942	Inf1_ListDelta.fasta-vs-0111A.mpileup	289	278	567	G	A
CitroK_0123A_6:560942	Inf1_ListDelta.fasta-vs-0114A.mpileup	287	329	616	G	A
CitroK_0123A_6:560942	Inf1_ListDelta.fasta-vs-0117A.mpileup	165	175	341	G	A
CitroK_0123A_6:560942	Inf1_ListDelta.fasta-vs-0123A.mpileup	235	197	432	G	A
CitroK_0123A_6:560942	Inf1_ListDelta.fasta-vs-0126A.mpileup	234	256	490	G	A
CitroK_0123A_6:560942	Inf1_ListDelta.fasta-vs-0118A.mpileup	208	169	378	G	A
CitroK_0123A_6:560942	Inf1_ListDelta.fasta-vs-0124A.mpileup	255	247	504	G	A
CitroK_0123A_6:560942	Inf1_ListDelta.fasta-vs-0106W.mpileup	23	22	45	G	A
CitroK_0123A_6:560942	Inf1_ListDelta.fasta-vs-0112A.mpileup	337	370	707	G	A
CitroK_0123A_6:560942	Inf1_ListDelta.fasta-vs-0125A.mpileup	279	260	539	G	A
CitroK_0123A_6:560942	Inf1_ListDelta.fasta-vs-0127A.mpileup	99	83	182	G	A
CitroK_0123A_6:560942	Inf1_ListDelta.fasta-vs-0106Y.mpileup	267	266	533	G	A
CitroK_0123A_6:560942	Inf1_ListDelta.fasta-vs-0115A.mpileup	241	241	484	G	A
CitroK_0123A_6:560942	Inf1_ListDelta.fasta-vs-0119A.mpileup	242	243	486	G	A
CitroK_0123A_6:560942	Inf1_ListDelta.fasta-vs-0121A.mpileup	221	235	458	G	A
CitroK_0123A_6:1585198	Inf1_ListDelta.fasta-vs-0123W.mpileup	256	0	256	C	T
CitroK_0123A_6:1585198	Inf1_ListDelta.fasta-vs-0123Y.mpileup	346	0	346	C	T
CitroK_0123A_6:1585198	Inf1_ListDelta.fasta-vs-0116A.mpileup	658	0	658	C	T
CitroK_0123A_6:1585198	Inf1_ListDelta.fasta-vs-0110A.mpileup	489	0	489	C	T
CitroK_0123A_6:1585198	Inf1_ListDelta.fasta-vs-0113A.mpileup	826	0	826	C	T
CitroK_0123A_6:1585198	Inf1_ListDelta.fasta-vs-0120A.mpileup	523	0	523	C	T
CitroK_0123A_6:1585198	Inf1_ListDelta.fasta-vs-0111A.mpileup	523	0	524	C	T
CitroK_0123A_6:1585198	Inf1_ListDelta.fasta-vs-0114A.mpileup	558	0	558	C	T
CitroK_0123A_6:1585198	Inf1_ListDelta.fasta-vs-0117A.mpileup	324	0	324	C	T
CitroK_0123A_6:1585198	Inf1_ListDelta.fasta-vs-0123A.mpileup	518	0	518	C	T
CitroK_0123A_6:1585198	Inf1_ListDelta.fasta-vs-0126A.mpileup	548	0	549	C	T
CitroK_0123A_6:1585198	Inf1_ListDelta.fasta-vs-0118A.mpileup	353	0	353	C	T
CitroK_0123A_6:1585198	Inf1_ListDelta.fasta-vs-0124A.mpileup	584	0	585	C	T
CitroK_0123A_6:1585198	Inf1_ListDelta.fasta-vs-0106W.mpileup	98	0	98	C	T
CitroK_0123A_6:1585198	Inf1_ListDelta.fasta-vs-0112A.mpileup	665	0	665	C	T
CitroK_0123A_6:1585198	Inf1_ListDelta.fasta-vs-0125A.mpileup	584	0	584	C	T
CitroK_0123A_6:1585198	Inf1_ListDelta.fasta-vs-0127A.mpileup	279	1	280	C	T
CitroK_0123A_6:1585198	Inf1_ListDelta.fasta-vs-0106Y.mpileup	685	0	686	C	T
CitroK_0123A_6:1585198	Inf1_ListDelta.fasta-vs-0115A.mpileup	507	0	507	C	T
CitroK_0123A_6:1585198	Inf1_ListDelta.fasta-vs-0119A.mpileup	528	0	528	C	T
CitroK_0123A_6:1585198	Inf1_ListDelta.fasta-vs-0121A.mpileup	434	1	435	C	T
CitroK_0123A_6:2210589	Inf1_ListDelta.fasta-vs-0123W.mpileup	52	0	52	T	A
CitroK_0123A_6:2210589	Inf1_ListDelta.fasta-vs-0123Y.mpileup	34	0	34	T	A
CitroK_0123A_6:2210589	Inf1_ListDelta.fasta-vs-0116A.mpileup	225	7	232	T	A
CitroK_0123A_6:2210589	Inf1_ListDelta.fasta-vs-0110A.mpileup	221	2	223	T	A
CitroK_0123A_6:2210589	Inf1_ListDelta.fasta-vs-0113A.mpileup	145	1	146	T	A
CitroK_0123A_6:2210589	Inf1_ListDelta.fasta-vs-0120A.mpileup	224	5	229	T	A
CitroK_0123A_6:2210589	Inf1_ListDelta.fasta-vs-0111A.mpileup	125	1	126	T	A
CitroK_0123A_6:2210589	Inf1_ListDelta.fasta-vs-0114A.mpileup	229	2	231	T	A
CitroK_0123A_6:2210589	Inf1_ListDelta.fasta-vs-0117A.mpileup	83	1	84	T	A
CitroK_0123A_6:2210589	Inf1_ListDelta.fasta-vs-0123A.mpileup	152	5	157	T	A
CitroK_0123A_6:2210589	Inf1_ListDelta.fasta-vs-0126A.mpileup	122	1	131	T	A
CitroK_0123A_6:2210589	Inf1_ListDelta.fasta-vs-0118A.mpileup	128	3	131	T	A
CitroK_0123A_6:2210589	Inf1_ListDelta.fasta-vs-0124A.mpileup	116	1	117	T	A
CitroK_0123A_6:2210589	Inf1_ListDelta.fasta-vs-0106W.mpileup	9	0	9	T	A
CitroK_0123A_6:2210589	Inf1_ListDelta.fasta-vs-0112A.mpileup	274	4	278	T	A
CitroK_0123A_6:2210589	Inf1_ListDelta.fasta-vs-0125A.mpileup	165	6	188	T	A
CitroK_0123A_6:2210589	Inf1_ListDelta.fasta-vs-0127A.mpileup	75	0	105	T	A
CitroK_0123A_6:2210589	Inf1_ListDelta.fasta-vs-0106Y.mpileup	104	0	104	T	A
CitroK_0123A_6:2210589	Inf1_ListDelta.fasta-vs-0115A.mpileup	101	1	102	T	A
CitroK_0123A_6:2210589	Inf1_ListDelta.fasta-vs-0119A.mpileup	109	4	114	T	A
CitroK_0123A_6:2210589	Inf1_ListDelta.fasta-vs-0121A.mpileup	113	2	115	T	A
CitroK_0123A_6:1394387	Inf1_ListDelta.fasta-vs-0123W.mpileup	270	0	270	G	T
CitroK_0123A_6:1394387	Inf1_ListDelta.fasta-vs-0123Y.mpileup	325	0	325	G	T
CitroK_0123A_6:1394387	Inf1_ListDelta.fasta-vs-0116A.mpileup	730	2	732	G	T
CitroK_0123A_6:1394387	Inf1_ListDelta.fasta-vs-0110A.mpileup	595	0	595	G	T
CitroK_0123A_6:1394387	Inf1_ListDelta.fasta-vs-0113A.mpileup	725	1	728	G	T
CitroK_0123A_6:1394387	Inf1_ListDelta.fasta-vs-0120A.mpileup	579	1	581	G	T
CitroK_0123A_6:1394387	Inf1_ListDelta.fasta-vs-0111A.mpileup	568	1	569	G	T
CitroK_0123A_6:1394387	Inf1_ListDelta.fasta-vs-0114A.mpileup	677	0	677	G	T
CitroK_0123A_6:1394387	Inf1_ListDelta.fasta-vs-0117A.mpileup	407	0	408	G	T
CitroK_0123A_6:1394387	Inf1_ListDelta.fasta-vs-0123A.mpileup	464	0	464	G	T
CitroK_0123A_6:1394387	Inf1_ListDelta.fasta-vs-0126A.mpileup	488	0	488	G	T
CitroK_0123A_6:1394387	Inf1_ListDelta.fasta-vs-0118A.mpileup	386	0	386	G	T
CitroK_0123A_6:1394387	Inf1_ListDelta.fasta-vs-0124A.mpileup	492	1	495	G	T
CitroK_0123A_6:1394387	Inf1_ListDelta.fasta-vs-0106W.mpileup	70	0	70	G	T
CitroK_0123A_6:1394387	Inf1_ListDelta.fasta-vs-0112A.mpileup	834	2	836	G	T
CitroK_0123A_6:1394387	Inf1_ListDelta.fasta-vs-0125A.mpileup	526	3	530	G	T
CitroK_0123A_6:1394387	Inf1_ListDelta.fasta-vs-0127A.mpileup	197	0	197	G	T
CitroK_0123A_6:1394387	Inf1_ListDelta.fasta-vs-0106Y.mpileup	670	1	672	G	T
CitroK_0123A_6:1394387	Inf1_ListDelta.fasta-vs-0115A.mpileup	427	0	428	G	T
CitroK_0123A_6:1394387	Inf1_ListDelta.fasta-vs-0119A.mpileup	536	1	539	G	T
CitroK_0123A_6:1394387	Inf1_ListDelta.fasta-vs-0121A.mpileup	519	2	522	G	T
CitroK_0123A_6:1970730	Inf1_ListDelta.fasta-vs-0123W.mpileup	338	0	338	A	C
CitroK_0123A_6:1970730	Inf1_ListDelta.fasta-vs-0123Y.mpileup	397	0	397	A	C
CitroK_0123A_6:1970730	Inf1_ListDelta.fasta-vs-0116A.mpileup	793	0	794	A	C
CitroK_0123A_6:1970730	Inf1_ListDelta.fasta-vs-0110A.mpileup	693	0	693	A	C
CitroK_0123A_6:1970730	Inf1_ListDelta.fasta-vs-0113A.mpileup	851	1	855	A	C
CitroK_0123A_6:1970730	Inf1_ListDelta.fasta-vs-0120A.mpileup	709	0	710	A	C
CitroK_0123A_6:1970730	Inf1_ListDelta.fasta-vs-0111A.mpileup	712	3	715	A	C
CitroK_0123A_6:1970730	Inf1_ListDelta.fasta-vs-0114A.mpileup	745	0	745	A	C
CitroK_0123A_6:1970730	Inf1_ListDelta.fasta-vs-0117A.mpileup	436	2	438	A	C
CitroK_0123A_6:1970730	Inf1_ListDelta.fasta-vs-0123A.mpileup	524	0	524	A	C
CitroK_0123A_6:1970730	Inf1_ListDelta.fasta-vs-0126A.mpileup	554	1	556	A	C
CitroK_0123A_6:1970730	Inf1_ListDelta.fasta-vs-0118A.mpileup	440	1	441	A	C
CitroK_0123A_6:1970730	Inf1_ListDelta.fasta-vs-0124A.mpileup	534	0	535	A	C
CitroK_0123A_6:1970730	Inf1_ListDelta.fasta-vs-0106W.mpileup	100	0	100	A	C
CitroK_0123A_6:1970730	Inf1_ListDelta.fasta-vs-0112A.mpileup	907	1	909	A	C
CitroK_0123A_6:1970730	Inf1_ListDelta.fasta-vs-0125A.mpileup	606	1	609	A	C
CitroK_0123A_6:1970730	Inf1_ListDelta.fasta-vs-0127A.mpileup	225	0	227	A	C
CitroK_0123A_6:1970730	Inf1_ListDelta.fasta-vs-0106Y.mpileup	793	0	794	A	C
CitroK_0123A_6:1970730	Inf1_ListDelta.fasta-vs-0115A.mpileup	511	0	513	A	C
CitroK_0123A_6:1970730	Inf1_ListDelta.fasta-vs-0119A.mpileup	668	1	669	A	C
CitroK_0123A_6:1970730	Inf1_ListDelta.fasta-vs-0121A.mpileup	598	1	599	A	C
CitroK_0123A_6:1584103	Inf1_ListDelta.fasta-vs-0123W.mpileup	321	0	322	C	A
CitroK_0123A_6:1584103	Inf1_ListDelta.fasta-vs-0123Y.mpileup	323	0	323	C	A
CitroK_0123A_6:1584103	Inf1_ListDelta.fasta-vs-0116A.mpileup	603	1	604	C	A
CitroK_0123A_6:1584103	Inf1_ListDelta.fasta-vs-0110A.mpileup	505	0	506	C	A
CitroK_0123A_6:1584103	Inf1_ListDelta.fasta-vs-0113A.mpileup	671	1	672	C	A
CitroK_0123A_6:1584103	Inf1_ListDelta.fasta-vs-0120A.mpileup	519	0	521	C	A
CitroK_0123A_6:1584103	Inf1_ListDelta.fasta-vs-0111A.mpileup	421	0	421	C	A
CitroK_0123A_6:1584103	Inf1_ListDelta.fasta-vs-0114A.mpileup	566	0	567	C	A
CitroK_0123A_6:1584103	Inf1_ListDelta.fasta-vs-0117A.mpileup	303	0	303	C	A
CitroK_0123A_6:1584103	Inf1_ListDelta.fasta-vs-0123A.mpileup	567	0	568	C	A
CitroK_0123A_6:1584103	Inf1_ListDelta.fasta-vs-0126A.mpileup	590	0	605	C	A
CitroK_0123A_6:1584103	Inf1_ListDelta.fasta-vs-0118A.mpileup	329	0	329	C	A
CitroK_0123A_6:1584103	Inf1_ListDelta.fasta-vs-0124A.mpileup	660	1	661	C	A
CitroK_0123A_6:1584103	Inf1_ListDelta.fasta-vs-0106W.mpileup	126	0	126	C	A
CitroK_0123A_6:1584103	Inf1_ListDelta.fasta-vs-0112A.mpileup	640	0	641	C	A
CitroK_0123A_6:1584103	Inf1_ListDelta.fasta-vs-0125A.mpileup	602	0	647	C	A
CitroK_0123A_6:1584103	Inf1_ListDelta.fasta-vs-0127A.mpileup	264	0	385	C	A
CitroK_0123A_6:1584103	Inf1_ListDelta.fasta-vs-0106Y.mpileup	694	2	696	C	A
CitroK_0123A_6:1584103	Inf1_ListDelta.fasta-vs-0115A.mpileup	478	0	478	C	A
CitroK_0123A_6:1584103	Inf1_ListDelta.fasta-vs-0119A.mpileup	439	0	439	C	A
CitroK_0123A_6:1584103	Inf1_ListDelta.fasta-vs-0121A.mpileup	388	0	388	C	A
CitroK_0123A_6:1920943	Inf1_ListDelta.fasta-vs-0123W.mpileup	294	294	294	A	A
CitroK_0123A_6:1920943	Inf1_ListDelta.fasta-vs-0123Y.mpileup	313	313	315	A	A
CitroK_0123A_6:1920943	Inf1_ListDelta.fasta-vs-0116A.mpileup	794	794	796	A	A
CitroK_0123A_6:1920943	Inf1_ListDelta.fasta-vs-0110A.mpileup	600	600	600	A	A
CitroK_0123A_6:1920943	Inf1_ListDelta.fasta-vs-0113A.mpileup	714	714	716	A	A
CitroK_0123A_6:1920943	Inf1_ListDelta.fasta-vs-0120A.mpileup	719	719	719	A	A
CitroK_0123A_6:1920943	Inf1_ListDelta.fasta-vs-0111A.mpileup	606	606	608	A	A
CitroK_0123A_6:1920943	Inf1_ListDelta.fasta-vs-0114A.mpileup	741	741	742	A	A
CitroK_0123A_6:1920943	Inf1_ListDelta.fasta-vs-0117A.mpileup	382	382	383	A	A
CitroK_0123A_6:1920943	Inf1_ListDelta.fasta-vs-0123A.mpileup	537	537	538	A	A
CitroK_0123A_6:1920943	Inf1_ListDelta.fasta-vs-0126A.mpileup	507	507	508	A	A
CitroK_0123A_6:1920943	Inf1_ListDelta.fasta-vs-0118A.mpileup	409	409	410	A	A
CitroK_0123A_6:1920943	Inf1_ListDelta.fasta-vs-0124A.mpileup	485	485	485	A	A
CitroK_0123A_6:1920943	Inf1_ListDelta.fasta-vs-0106W.mpileup	87	87	87	A	A
CitroK_0123A_6:1920943	Inf1_ListDelta.fasta-vs-0112A.mpileup	891	891	891	A	A
CitroK_0123A_6:1920943	Inf1_ListDelta.fasta-vs-0125A.mpileup	541	541	541	A	A
CitroK_0123A_6:1920943	Inf1_ListDelta.fasta-vs-0127A.mpileup	257	257	257	A	A
CitroK_0123A_6:1920943	Inf1_ListDelta.fasta-vs-0106Y.mpileup	711	711	713	A	A
CitroK_0123A_6:1920943	Inf1_ListDelta.fasta-vs-0115A.mpileup	454	454	455	A	A
CitroK_0123A_6:1920943	Inf1_ListDelta.fasta-vs-0119A.mpileup	550	550	550	A	A
CitroK_0123A_6:1920943	Inf1_ListDelta.fasta-vs-0121A.mpileup	517	517	517	A	A
CitroK_0123A_6:2681430	Inf1_ListDelta.fasta-vs-0123W.mpileup	242	0	242	T	A
CitroK_0123A_6:2681430	Inf1_ListDelta.fasta-vs-0123Y.mpileup	322	0	322	T	A
CitroK_0123A_6:2681430	Inf1_ListDelta.fasta-vs-0116A.mpileup	808	0	808	T	A
CitroK_0123A_6:2681430	Inf1_ListDelta.fasta-vs-0110A.mpileup	624	0	624	T	A
CitroK_0123A_6:2681430	Inf1_ListDelta.fasta-vs-0113A.mpileup	720	0	720	T	A
CitroK_0123A_6:2681430	Inf1_ListDelta.fasta-vs-0120A.mpileup	609	0	609	T	A
CitroK_0123A_6:2681430	Inf1_ListDelta.fasta-vs-0111A.mpileup	651	1	653	T	A
CitroK_0123A_6:2681430	Inf1_ListDelta.fasta-vs-0114A.mpileup	722	0	722	T	A
CitroK_0123A_6:2681430	Inf1_ListDelta.fasta-vs-0117A.mpileup	409	0	410	T	A
CitroK_0123A_6:2681430	Inf1_ListDelta.fasta-vs-0123A.mpileup	516	0	516	T	A
CitroK_0123A_6:2681430	Inf1_ListDelta.fasta-vs-0126A.mpileup	538	0	542	T	A
CitroK_0123A_6:2681430	Inf1_ListDelta.fasta-vs-0118A.mpileup	476	0	477	T	A
CitroK_0123A_6:2681430	Inf1_ListDelta.fasta-vs-0124A.mpileup	503	1	504	T	A
CitroK_0123A_6:2681430	Inf1_ListDelta.fasta-vs-0106W.mpileup	82	0	82	T	A
CitroK_0123A_6:2681430	Inf1_ListDelta.fasta-vs-0112A.mpileup	891	0	892	T	A
CitroK_0123A_6:2681430	Inf1_ListDelta.fasta-vs-0125A.mpileup	591	0	609	T	A
CitroK_0123A_6:2681430	Inf1_ListDelta.fasta-vs-0127A.mpileup	244	0	274	T	A
CitroK_0123A_6:2681430	Inf1_ListDelta.fasta-vs-0106Y.mpileup	702	0	702	T	A
CitroK_0123A_6:2681430	Inf1_ListDelta.fasta-vs-0115A.mpileup	487	0	487	T	A
CitroK_0123A_6:2681430	Inf1_ListDelta.fasta-vs-0119A.mpileup	556	0	556	T	A
CitroK_0123A_6:2681430	Inf1_ListDelta.fasta-vs-0121A.mpileup	532	0	532	T	A
CitroK_0123A_6:2711770	Inf1_ListDelta.fasta-vs-0123W.mpileup	260	260	260	A	A
CitroK_0123A_6:2711770	Inf1_ListDelta.fasta-vs-0123Y.mpileup	346	346	346	A	A
CitroK_0123A_6:2711770	Inf1_ListDelta.fasta-vs-0116A.mpileup	354	354	354	A	A
CitroK_0123A_6:2711770	Inf1_ListDelta.fasta-vs-0110A.mpileup	360	360	360	A	A
CitroK_0123A_6:2711770	Inf1_ListDelta.fasta-vs-0113A.mpileup	534	534	536	A	A
CitroK_0123A_6:2711770	Inf1_ListDelta.fasta-vs-0120A.mpileup	282	282	282	A	A
CitroK_0123A_6:2711770	Inf1_ListDelta.fasta-vs-0111A.mpileup	432	432	432	A	A
CitroK_0123A_6:2711770	Inf1_ListDelta.fasta-vs-0114A.mpileup	279	279	279	A	A
CitroK_0123A_6:2711770	Inf1_ListDelta.fasta-vs-0117A.mpileup	295	295	295	A	A
CitroK_0123A_6:2711770	Inf1_ListDelta.fasta-vs-0123A.mpileup	216	216	217	A	A
CitroK_0123A_6:2711770	Inf1_ListDelta.fasta-vs-0126A.mpileup	451	451	478	A	A
CitroK_0123A_6:2711770	Inf1_ListDelta.fasta-vs-0118A.mpileup	179	179	179	A	A
CitroK_0123A_6:2711770	Inf1_ListDelta.fasta-vs-0124A.mpileup	430	430	430	A	A
CitroK_0123A_6:2711770	Inf1_ListDelta.fasta-vs-0106W.mpileup	85	85	85	A	A
CitroK_0123A_6:2711770	Inf1_ListDelta.fasta-vs-0112A.mpileup	350	350	351	A	A
CitroK_0123A_6:2711770	Inf1_ListDelta.fasta-vs-0125A.mpileup	266	266	386	A	A
CitroK_0123A_6:2711770	Inf1_ListDelta.fasta-vs-0127A.mpileup	113	113	356	A	A
CitroK_0123A_6:2711770	Inf1_ListDelta.fasta-vs-0106Y.mpileup	705	705	705	A	A
CitroK_0123A_6:2711770	Inf1_ListDelta.fasta-vs-0115A.mpileup	354	354	354	A	A
CitroK_0123A_6:2711770	Inf1_ListDelta.fasta-vs-0119A.mpileup	439	439	439	A	A
CitroK_0123A_6:2711770	Inf1_ListDelta.fasta-vs-0121A.mpileup	350	350	350	A	A
CitroK_0123A_6:3430358	Inf1_ListDelta.fasta-vs-0123W.mpileup	272	272	272	A	A
CitroK_0123A_6:3430358	Inf1_ListDelta.fasta-vs-0123Y.mpileup	333	333	333	A	A
CitroK_0123A_6:3430358	Inf1_ListDelta.fasta-vs-0116A.mpileup	691	691	691	A	A
CitroK_0123A_6:3430358	Inf1_ListDelta.fasta-vs-0110A.mpileup	635	635	636	A	A
CitroK_0123A_6:3430358	Inf1_ListDelta.fasta-vs-0113A.mpileup	776	776	779	A	A
CitroK_0123A_6:3430358	Inf1_ListDelta.fasta-vs-0120A.mpileup	596	596	597	A	A
CitroK_0123A_6:3430358	Inf1_ListDelta.fasta-vs-0111A.mpileup	634	634	634	A	A
CitroK_0123A_6:3430358	Inf1_ListDelta.fasta-vs-0114A.mpileup	668	668	669	A	A
CitroK_0123A_6:3430358	Inf1_ListDelta.fasta-vs-0117A.mpileup	395	395	396	A	A
CitroK_0123A_6:3430358	Inf1_ListDelta.fasta-vs-0123A.mpileup	461	461	462	A	A
CitroK_0123A_6:3430358	Inf1_ListDelta.fasta-vs-0126A.mpileup	494	494	494	A	A
CitroK_0123A_6:3430358	Inf1_ListDelta.fasta-vs-0118A.mpileup	394	394	394	A	A
CitroK_0123A_6:3430358	Inf1_ListDelta.fasta-vs-0124A.mpileup	495	495	495	A	A
CitroK_0123A_6:3430358	Inf1_ListDelta.fasta-vs-0106W.mpileup	55	55	55	A	A
CitroK_0123A_6:3430358	Inf1_ListDelta.fasta-vs-0112A.mpileup	768	768	768	A	A
CitroK_0123A_6:3430358	Inf1_ListDelta.fasta-vs-0125A.mpileup	537	537	537	A	A
CitroK_0123A_6:3430358	Inf1_ListDelta.fasta-vs-0127A.mpileup	212	212	212	A	A
CitroK_0123A_6:3430358	Inf1_ListDelta.fasta-vs-0106Y.mpileup	606	606	606	A	A
CitroK_0123A_6:3430358	Inf1_ListDelta.fasta-vs-0115A.mpileup	496	496	497	A	A
CitroK_0123A_6:3430358	Inf1_ListDelta.fasta-vs-0119A.mpileup	583	583	583	A	A
CitroK_0123A_6:3430358	Inf1_ListDelta.fasta-vs-0121A.mpileup	551	551	551	A	A
CitroK_0123A_6:743426	Inf1_ListDelta.fasta-vs-0123W.mpileup	200	0	200	A	G
CitroK_0123A_6:743426	Inf1_ListDelta.fasta-vs-0123Y.mpileup	270	0	272	A	G
CitroK_0123A_6:743426	Inf1_ListDelta.fasta-vs-0116A.mpileup	643	0	645	A	G
CitroK_0123A_6:743426	Inf1_ListDelta.fasta-vs-0110A.mpileup	603	0	603	A	G
CitroK_0123A_6:743426	Inf1_ListDelta.fasta-vs-0113A.mpileup	708	0	709	A	G
CitroK_0123A_6:743426	Inf1_ListDelta.fasta-vs-0120A.mpileup	600	0	602	A	G
CitroK_0123A_6:743426	Inf1_ListDelta.fasta-vs-0111A.mpileup	567	1	568	A	G
CitroK_0123A_6:743426	Inf1_ListDelta.fasta-vs-0114A.mpileup	665	0	666	A	G
CitroK_0123A_6:743426	Inf1_ListDelta.fasta-vs-0117A.mpileup	358	1	360	A	G
CitroK_0123A_6:743426	Inf1_ListDelta.fasta-vs-0123A.mpileup	452	0	452	A	G
CitroK_0123A_6:743426	Inf1_ListDelta.fasta-vs-0126A.mpileup	460	1	463	A	G
CitroK_0123A_6:743426	Inf1_ListDelta.fasta-vs-0118A.mpileup	403	1	404	A	G
CitroK_0123A_6:743426	Inf1_ListDelta.fasta-vs-0124A.mpileup	473	0	475	A	G
CitroK_0123A_6:743426	Inf1_ListDelta.fasta-vs-0106W.mpileup	50	0	50	A	G
CitroK_0123A_6:743426	Inf1_ListDelta.fasta-vs-0112A.mpileup	741	0	743	A	G
CitroK_0123A_6:743426	Inf1_ListDelta.fasta-vs-0125A.mpileup	474	0	477	A	G
CitroK_0123A_6:743426	Inf1_ListDelta.fasta-vs-0127A.mpileup	212	0	216	A	G
CitroK_0123A_6:743426	Inf1_ListDelta.fasta-vs-0106Y.mpileup	578	0	579	A	G
CitroK_0123A_6:743426	Inf1_ListDelta.fasta-vs-0115A.mpileup	456	0	457	A	G
CitroK_0123A_6:743426	Inf1_ListDelta.fasta-vs-0119A.mpileup	511	1	513	A	G
CitroK_0123A_6:743426	Inf1_ListDelta.fasta-vs-0121A.mpileup	503	1	504	A	G
CitroK_0123A_6:2120873	Inf1_ListDelta.fasta-vs-0123W.mpileup	1	10	11	A	G
CitroK_0123A_6:2120873	Inf1_ListDelta.fasta-vs-0123Y.mpileup	2	5	7	A	G
CitroK_0123A_6:2120873	Inf1_ListDelta.fasta-vs-0116A.mpileup	0	285	285	A	G
CitroK_0123A_6:2120873	Inf1_ListDelta.fasta-vs-0110A.mpileup	1	223	225	A	G
CitroK_0123A_6:2120873	Inf1_ListDelta.fasta-vs-0113A.mpileup	2	87	89	A	G
CitroK_0123A_6:2120873	Inf1_ListDelta.fasta-vs-0120A.mpileup	2	222	224	A	G
CitroK_0123A_6:2120873	Inf1_ListDelta.fasta-vs-0111A.mpileup	2	64	66	A	G
CitroK_0123A_6:2120873	Inf1_ListDelta.fasta-vs-0114A.mpileup	0	264	264	A	G
CitroK_0123A_6:2120873	Inf1_ListDelta.fasta-vs-0117A.mpileup	1	31	33	A	G
CitroK_0123A_6:2120873	Inf1_ListDelta.fasta-vs-0123A.mpileup	1	162	163	A	G
CitroK_0123A_6:2120873	Inf1_ListDelta.fasta-vs-0126A.mpileup	10	60	70	A	G
CitroK_0123A_6:2120873	Inf1_ListDelta.fasta-vs-0118A.mpileup	1	164	165	A	G
CitroK_0123A_6:2120873	Inf1_ListDelta.fasta-vs-0124A.mpileup	3	58	61	A	G
CitroK_0123A_6:2120873	Inf1_ListDelta.fasta-vs-0106W.mpileup	0	6	6	A	G
CitroK_0123A_6:2120873	Inf1_ListDelta.fasta-vs-0112A.mpileup	3	312	316	A	G
CitroK_0123A_6:2120873	Inf1_ListDelta.fasta-vs-0125A.mpileup	36	172	210	A	G
CitroK_0123A_6:2120873	Inf1_ListDelta.fasta-vs-0127A.mpileup	78	68	146	A	G
CitroK_0123A_6:2120873	Inf1_ListDelta.fasta-vs-0106Y.mpileup	0	15	15	A	G
CitroK_0123A_6:2120873	Inf1_ListDelta.fasta-vs-0115A.mpileup	2	53	55	A	G
CitroK_0123A_6:2120873	Inf1_ListDelta.fasta-vs-0119A.mpileup	1	53	54	A	G
CitroK_0123A_6:2120873	Inf1_ListDelta.fasta-vs-0121A.mpileup	0	59	59	A	G
CitroK_0123A_6:2681943	Inf1_ListDelta.fasta-vs-0123W.mpileup	320	0	321	A	T
CitroK_0123A_6:2681943	Inf1_ListDelta.fasta-vs-0123Y.mpileup	392	1	394	A	T
CitroK_0123A_6:2681943	Inf1_ListDelta.fasta-vs-0116A.mpileup	752	0	753	A	T
CitroK_0123A_6:2681943	Inf1_ListDelta.fasta-vs-0110A.mpileup	657	1	659	A	T
CitroK_0123A_6:2681943	Inf1_ListDelta.fasta-vs-0113A.mpileup	817	0	820	A	T
CitroK_0123A_6:2681943	Inf1_ListDelta.fasta-vs-0120A.mpileup	675	0	675	A	T
CitroK_0123A_6:2681943	Inf1_ListDelta.fasta-vs-0111A.mpileup	684	1	686	A	T
CitroK_0123A_6:2681943	Inf1_ListDelta.fasta-vs-0114A.mpileup	767	0	769	A	T
CitroK_0123A_6:2681943	Inf1_ListDelta.fasta-vs-0117A.mpileup	449	0	450	A	T
CitroK_0123A_6:2681943	Inf1_ListDelta.fasta-vs-0123A.mpileup	509	0	509	A	T
CitroK_0123A_6:2681943	Inf1_ListDelta.fasta-vs-0126A.mpileup	608	0	610	A	T
CitroK_0123A_6:2681943	Inf1_ListDelta.fasta-vs-0118A.mpileup	457	0	457	A	T
CitroK_0123A_6:2681943	Inf1_ListDelta.fasta-vs-0124A.mpileup	611	0	611	A	T
CitroK_0123A_6:2681943	Inf1_ListDelta.fasta-vs-0106W.mpileup	94	0	94	A	T
CitroK_0123A_6:2681943	Inf1_ListDelta.fasta-vs-0112A.mpileup	920	1	924	A	T
CitroK_0123A_6:2681943	Inf1_ListDelta.fasta-vs-0125A.mpileup	574	0	582	A	T
CitroK_0123A_6:2681943	Inf1_ListDelta.fasta-vs-0127A.mpileup	216	0	233	A	T
CitroK_0123A_6:2681943	Inf1_ListDelta.fasta-vs-0106Y.mpileup	769	0	771	A	T
CitroK_0123A_6:2681943	Inf1_ListDelta.fasta-vs-0115A.mpileup	577	0	578	A	T
CitroK_0123A_6:2681943	Inf1_ListDelta.fasta-vs-0119A.mpileup	689	0	689	A	T
CitroK_0123A_6:2681943	Inf1_ListDelta.fasta-vs-0121A.mpileup	561	1	563	A	T
CitroK_0123A_6:2695032	Inf1_ListDelta.fasta-vs-0123W.mpileup	292	0	293	T	A
CitroK_0123A_6:2695032	Inf1_ListDelta.fasta-vs-0123Y.mpileup	376	0	376	T	A
CitroK_0123A_6:2695032	Inf1_ListDelta.fasta-vs-0116A.mpileup	531	1	532	T	A
CitroK_0123A_6:2695032	Inf1_ListDelta.fasta-vs-0110A.mpileup	403	0	404	T	A
CitroK_0123A_6:2695032	Inf1_ListDelta.fasta-vs-0113A.mpileup	513	0	513	T	A
CitroK_0123A_6:2695032	Inf1_ListDelta.fasta-vs-0120A.mpileup	385	0	386	T	A
CitroK_0123A_6:2695032	Inf1_ListDelta.fasta-vs-0111A.mpileup	413	0	413	T	A
CitroK_0123A_6:2695032	Inf1_ListDelta.fasta-vs-0114A.mpileup	460	0	460	T	A
CitroK_0123A_6:2695032	Inf1_ListDelta.fasta-vs-0117A.mpileup	263	1	264	T	A
CitroK_0123A_6:2695032	Inf1_ListDelta.fasta-vs-0123A.mpileup	581	2	587	T	A
CitroK_0123A_6:2695032	Inf1_ListDelta.fasta-vs-0126A.mpileup	619	0	637	T	A
CitroK_0123A_6:2695032	Inf1_ListDelta.fasta-vs-0118A.mpileup	284	0	285	T	A
CitroK_0123A_6:2695032	Inf1_ListDelta.fasta-vs-0124A.mpileup	596	1	598	T	A
CitroK_0123A_6:2695032	Inf1_ListDelta.fasta-vs-0106W.mpileup	79	0	79	T	A
CitroK_0123A_6:2695032	Inf1_ListDelta.fasta-vs-0112A.mpileup	520	0	522	T	A
CitroK_0123A_6:2695032	Inf1_ListDelta.fasta-vs-0125A.mpileup	616	0	669	T	A
CitroK_0123A_6:2695032	Inf1_ListDelta.fasta-vs-0127A.mpileup	264	0	389	T	A
CitroK_0123A_6:2695032	Inf1_ListDelta.fasta-vs-0106Y.mpileup	733	0	733	T	A
CitroK_0123A_6:2695032	Inf1_ListDelta.fasta-vs-0115A.mpileup	358	1	359	T	A
CitroK_0123A_6:2695032	Inf1_ListDelta.fasta-vs-0119A.mpileup	350	0	350	T	A
CitroK_0123A_6:2695032	Inf1_ListDelta.fasta-vs-0121A.mpileup	364	0	364	T	A
CitroK_0123A_6:1972680	Inf1_ListDelta.fasta-vs-0123W.mpileup	312	0	312	C	A
CitroK_0123A_6:1972680	Inf1_ListDelta.fasta-vs-0123Y.mpileup	378	0	378	C	A
CitroK_0123A_6:1972680	Inf1_ListDelta.fasta-vs-0116A.mpileup	813	0	814	C	A
CitroK_0123A_6:1972680	Inf1_ListDelta.fasta-vs-0110A.mpileup	677	0	678	C	A
CitroK_0123A_6:1972680	Inf1_ListDelta.fasta-vs-0113A.mpileup	845	0	845	C	A
CitroK_0123A_6:1972680	Inf1_ListDelta.fasta-vs-0120A.mpileup	669	2	671	C	A
CitroK_0123A_6:1972680	Inf1_ListDelta.fasta-vs-0111A.mpileup	747	0	747	C	A
CitroK_0123A_6:1972680	Inf1_ListDelta.fasta-vs-0114A.mpileup	796	0	798	C	A
CitroK_0123A_6:1972680	Inf1_ListDelta.fasta-vs-0117A.mpileup	458	0	458	C	A
CitroK_0123A_6:1972680	Inf1_ListDelta.fasta-vs-0123A.mpileup	563	0	565	C	A
CitroK_0123A_6:1972680	Inf1_ListDelta.fasta-vs-0126A.mpileup	579	0	599	C	A
CitroK_0123A_6:1972680	Inf1_ListDelta.fasta-vs-0118A.mpileup	470	0	470	C	A
CitroK_0123A_6:1972680	Inf1_ListDelta.fasta-vs-0124A.mpileup	570	0	570	C	A
CitroK_0123A_6:1972680	Inf1_ListDelta.fasta-vs-0106W.mpileup	112	0	112	C	A
CitroK_0123A_6:1972680	Inf1_ListDelta.fasta-vs-0112A.mpileup	895	1	898	C	A
CitroK_0123A_6:1972680	Inf1_ListDelta.fasta-vs-0125A.mpileup	618	2	666	C	A
CitroK_0123A_6:1972680	Inf1_ListDelta.fasta-vs-0127A.mpileup	236	0	349	C	A
CitroK_0123A_6:1972680	Inf1_ListDelta.fasta-vs-0106Y.mpileup	748	0	748	C	A
CitroK_0123A_6:1972680	Inf1_ListDelta.fasta-vs-0115A.mpileup	599	1	600	C	A
CitroK_0123A_6:1972680	Inf1_ListDelta.fasta-vs-0119A.mpileup	614	0	614	C	A
CitroK_0123A_6:1972680	Inf1_ListDelta.fasta-vs-0121A.mpileup	598	0	598	C	A
CitroK_0123A_6:3412305	Inf1_ListDelta.fasta-vs-0123W.mpileup	116	112	228	C	T
CitroK_0123A_6:3412305	Inf1_ListDelta.fasta-vs-0123Y.mpileup	153	150	303	C	T
CitroK_0123A_6:3412305	Inf1_ListDelta.fasta-vs-0116A.mpileup	291	330	621	C	T
CitroK_0123A_6:3412305	Inf1_ListDelta.fasta-vs-0110A.mpileup	278	287	565	C	T
CitroK_0123A_6:3412305	Inf1_ListDelta.fasta-vs-0113A.mpileup	321	336	657	C	T
CitroK_0123A_6:3412305	Inf1_ListDelta.fasta-vs-0120A.mpileup	290	284	574	C	T
CitroK_0123A_6:3412305	Inf1_ListDelta.fasta-vs-0111A.mpileup	308	249	557	C	T
CitroK_0123A_6:3412305	Inf1_ListDelta.fasta-vs-0114A.mpileup	322	317	639	C	T
CitroK_0123A_6:3412305	Inf1_ListDelta.fasta-vs-0117A.mpileup	193	163	356	C	T
CitroK_0123A_6:3412305	Inf1_ListDelta.fasta-vs-0123A.mpileup	249	185	434	C	T
CitroK_0123A_6:3412305	Inf1_ListDelta.fasta-vs-0126A.mpileup	277	197	474	C	T
CitroK_0123A_6:3412305	Inf1_ListDelta.fasta-vs-0118A.mpileup	204	167	372	C	T
CitroK_0123A_6:3412305	Inf1_ListDelta.fasta-vs-0124A.mpileup	241	220	461	C	T
CitroK_0123A_6:3412305	Inf1_ListDelta.fasta-vs-0106W.mpileup	30	25	55	C	T
CitroK_0123A_6:3412305	Inf1_ListDelta.fasta-vs-0112A.mpileup	402	333	735	C	T
CitroK_0123A_6:3412305	Inf1_ListDelta.fasta-vs-0125A.mpileup	272	276	550	C	T
CitroK_0123A_6:3412305	Inf1_ListDelta.fasta-vs-0127A.mpileup	104	109	213	C	T
CitroK_0123A_6:3412305	Inf1_ListDelta.fasta-vs-0106Y.mpileup	288	243	531	C	T
CitroK_0123A_6:3412305	Inf1_ListDelta.fasta-vs-0115A.mpileup	270	240	510	C	T
CitroK_0123A_6:3412305	Inf1_ListDelta.fasta-vs-0119A.mpileup	235	233	468	C	T
CitroK_0123A_6:3412305	Inf1_ListDelta.fasta-vs-0121A.mpileup	189	204	394	C	T
CitroK_0123A_6:1972818	Inf1_ListDelta.fasta-vs-0123W.mpileup	313	2	316	T	A
CitroK_0123A_6:1972818	Inf1_ListDelta.fasta-vs-0123Y.mpileup	376	0	376	T	A
CitroK_0123A_6:1972818	Inf1_ListDelta.fasta-vs-0116A.mpileup	786	0	786	T	A
CitroK_0123A_6:1972818	Inf1_ListDelta.fasta-vs-0110A.mpileup	731	0	732	T	A
CitroK_0123A_6:1972818	Inf1_ListDelta.fasta-vs-0113A.mpileup	828	1	829	T	A
CitroK_0123A_6:1972818	Inf1_ListDelta.fasta-vs-0120A.mpileup	664	0	665	T	A
CitroK_0123A_6:1972818	Inf1_ListDelta.fasta-vs-0111A.mpileup	675	0	676	T	A
CitroK_0123A_6:1972818	Inf1_ListDelta.fasta-vs-0114A.mpileup	816	0	816	T	A
CitroK_0123A_6:1972818	Inf1_ListDelta.fasta-vs-0117A.mpileup	442	0	442	T	A
CitroK_0123A_6:1972818	Inf1_ListDelta.fasta-vs-0123A.mpileup	553	0	553	T	A
CitroK_0123A_6:1972818	Inf1_ListDelta.fasta-vs-0126A.mpileup	577	0	604	T	A
CitroK_0123A_6:1972818	Inf1_ListDelta.fasta-vs-0118A.mpileup	472	0	472	T	A
CitroK_0123A_6:1972818	Inf1_ListDelta.fasta-vs-0124A.mpileup	628	0	629	T	A
CitroK_0123A_6:1972818	Inf1_ListDelta.fasta-vs-0106W.mpileup	85	0	85	T	A
CitroK_0123A_6:1972818	Inf1_ListDelta.fasta-vs-0112A.mpileup	844	0	844	T	A
CitroK_0123A_6:1972818	Inf1_ListDelta.fasta-vs-0125A.mpileup	611	0	665	T	A
CitroK_0123A_6:1972818	Inf1_ListDelta.fasta-vs-0127A.mpileup	271	1	400	T	A
CitroK_0123A_6:1972818	Inf1_ListDelta.fasta-vs-0106Y.mpileup	839	0	840	T	A
CitroK_0123A_6:1972818	Inf1_ListDelta.fasta-vs-0115A.mpileup	535	0	536	T	A
CitroK_0123A_6:1972818	Inf1_ListDelta.fasta-vs-0119A.mpileup	621	0	623	T	A
CitroK_0123A_6:1972818	Inf1_ListDelta.fasta-vs-0121A.mpileup	604	1	606	T	A
CitroK_0123A_6:316467	Inf1_ListDelta.fasta-vs-0123W.mpileup	196	0	196	A	T
CitroK_0123A_6:316467	Inf1_ListDelta.fasta-vs-0123Y.mpileup	259	0	259	A	T
CitroK_0123A_6:316467	Inf1_ListDelta.fasta-vs-0116A.mpileup	685	0	685	A	T
CitroK_0123A_6:316467	Inf1_ListDelta.fasta-vs-0110A.mpileup	610	0	610	A	T
CitroK_0123A_6:316467	Inf1_ListDelta.fasta-vs-0113A.mpileup	664	0	666	A	T
CitroK_0123A_6:316467	Inf1_ListDelta.fasta-vs-0120A.mpileup	545	0	546	A	T
CitroK_0123A_6:316467	Inf1_ListDelta.fasta-vs-0111A.mpileup	537	0	537	A	T
CitroK_0123A_6:316467	Inf1_ListDelta.fasta-vs-0114A.mpileup	688	0	689	A	T
CitroK_0123A_6:316467	Inf1_ListDelta.fasta-vs-0117A.mpileup	389	0	390	A	T
CitroK_0123A_6:316467	Inf1_ListDelta.fasta-vs-0123A.mpileup	417	0	417	A	T
CitroK_0123A_6:316467	Inf1_ListDelta.fasta-vs-0126A.mpileup	467	2	480	A	T
CitroK_0123A_6:316467	Inf1_ListDelta.fasta-vs-0118A.mpileup	398	0	398	A	T
CitroK_0123A_6:316467	Inf1_ListDelta.fasta-vs-0124A.mpileup	452	1	453	A	T
CitroK_0123A_6:316467	Inf1_ListDelta.fasta-vs-0106W.mpileup	48	0	48	A	T
CitroK_0123A_6:316467	Inf1_ListDelta.fasta-vs-0112A.mpileup	750	0	750	A	T
CitroK_0123A_6:316467	Inf1_ListDelta.fasta-vs-0125A.mpileup	449	0	464	A	T
CitroK_0123A_6:316467	Inf1_ListDelta.fasta-vs-0127A.mpileup	201	0	255	A	T
CitroK_0123A_6:316467	Inf1_ListDelta.fasta-vs-0106Y.mpileup	535	0	537	A	T
CitroK_0123A_6:316467	Inf1_ListDelta.fasta-vs-0115A.mpileup	416	1	417	A	T
CitroK_0123A_6:316467	Inf1_ListDelta.fasta-vs-0119A.mpileup	511	0	511	A	T
CitroK_0123A_6:316467	Inf1_ListDelta.fasta-vs-0121A.mpileup	463	1	465	A	T
CitroK_0123A_6:1369376	Inf1_ListDelta.fasta-vs-0123W.mpileup	245	245	245	A	A
CitroK_0123A_6:1369376	Inf1_ListDelta.fasta-vs-0123Y.mpileup	313	313	314	A	A
CitroK_0123A_6:1369376	Inf1_ListDelta.fasta-vs-0116A.mpileup	798	798	799	A	A
CitroK_0123A_6:1369376	Inf1_ListDelta.fasta-vs-0110A.mpileup	680	680	682	A	A
CitroK_0123A_6:1369376	Inf1_ListDelta.fasta-vs-0113A.mpileup	805	805	807	A	A
CitroK_0123A_6:1369376	Inf1_ListDelta.fasta-vs-0120A.mpileup	630	630	630	A	A
CitroK_0123A_6:1369376	Inf1_ListDelta.fasta-vs-0111A.mpileup	662	662	664	A	A
CitroK_0123A_6:1369376	Inf1_ListDelta.fasta-vs-0114A.mpileup	718	718	720	A	A
CitroK_0123A_6:1369376	Inf1_ListDelta.fasta-vs-0117A.mpileup	442	442	444	A	A
CitroK_0123A_6:1369376	Inf1_ListDelta.fasta-vs-0123A.mpileup	453	453	454	A	A
CitroK_0123A_6:1369376	Inf1_ListDelta.fasta-vs-0126A.mpileup	507	507	508	A	A
CitroK_0123A_6:1369376	Inf1_ListDelta.fasta-vs-0118A.mpileup	395	395	396	A	A
CitroK_0123A_6:1369376	Inf1_ListDelta.fasta-vs-0124A.mpileup	488	488	489	A	A
CitroK_0123A_6:1369376	Inf1_ListDelta.fasta-vs-0106W.mpileup	60	60	60	A	A
CitroK_0123A_6:1369376	Inf1_ListDelta.fasta-vs-0112A.mpileup	879	879	880	A	A
CitroK_0123A_6:1369376	Inf1_ListDelta.fasta-vs-0125A.mpileup	547	547	550	A	A
CitroK_0123A_6:1369376	Inf1_ListDelta.fasta-vs-0127A.mpileup	248	248	249	A	A
CitroK_0123A_6:1369376	Inf1_ListDelta.fasta-vs-0106Y.mpileup	630	630	631	A	A
CitroK_0123A_6:1369376	Inf1_ListDelta.fasta-vs-0115A.mpileup	497	497	498	A	A
CitroK_0123A_6:1369376	Inf1_ListDelta.fasta-vs-0119A.mpileup	571	571	571	A	A
CitroK_0123A_6:1369376	Inf1_ListDelta.fasta-vs-0121A.mpileup	526	526	526	A	A
CitroK_0123A_6:2080742	Inf1_ListDelta.fasta-vs-0123W.mpileup	373	373	373	A	A
CitroK_0123A_6:2080742	Inf1_ListDelta.fasta-vs-0123Y.mpileup	378	378	380	A	A
CitroK_0123A_6:2080742	Inf1_ListDelta.fasta-vs-0116A.mpileup	693	693	694	A	A
CitroK_0123A_6:2080742	Inf1_ListDelta.fasta-vs-0110A.mpileup	632	632	633	A	A
CitroK_0123A_6:2080742	Inf1_ListDelta.fasta-vs-0113A.mpileup	810	810	811	A	A
CitroK_0123A_6:2080742	Inf1_ListDelta.fasta-vs-0120A.mpileup	597	597	598	A	A
CitroK_0123A_6:2080742	Inf1_ListDelta.fasta-vs-0111A.mpileup	613	613	614	A	A
CitroK_0123A_6:2080742	Inf1_ListDelta.fasta-vs-0114A.mpileup	630	630	630	A	A
CitroK_0123A_6:2080742	Inf1_ListDelta.fasta-vs-0117A.mpileup	430	430	430	A	A
CitroK_0123A_6:2080742	Inf1_ListDelta.fasta-vs-0123A.mpileup	501	501	502	A	A
CitroK_0123A_6:2080742	Inf1_ListDelta.fasta-vs-0126A.mpileup	532	532	533	A	A
CitroK_0123A_6:2080742	Inf1_ListDelta.fasta-vs-0118A.mpileup	406	406	406	A	A
CitroK_0123A_6:2080742	Inf1_ListDelta.fasta-vs-0124A.mpileup	483	483	485	A	A
CitroK_0123A_6:2080742	Inf1_ListDelta.fasta-vs-0106W.mpileup	119	119	119	A	A
CitroK_0123A_6:2080742	Inf1_ListDelta.fasta-vs-0112A.mpileup	821	821	822	A	A
CitroK_0123A_6:2080742	Inf1_ListDelta.fasta-vs-0125A.mpileup	531	531	532	A	A
CitroK_0123A_6:2080742	Inf1_ListDelta.fasta-vs-0127A.mpileup	230	230	230	A	A
CitroK_0123A_6:2080742	Inf1_ListDelta.fasta-vs-0106Y.mpileup	835	835	835	A	A
CitroK_0123A_6:2080742	Inf1_ListDelta.fasta-vs-0115A.mpileup	462	462	462	A	A
CitroK_0123A_6:2080742	Inf1_ListDelta.fasta-vs-0119A.mpileup	605	605	606	A	A
CitroK_0123A_6:2080742	Inf1_ListDelta.fasta-vs-0121A.mpileup	547	547	547	A	A
CitroK_0123A_6:2820429	Inf1_ListDelta.fasta-vs-0123W.mpileup	326	0	326	A	G
CitroK_0123A_6:2820429	Inf1_ListDelta.fasta-vs-0123Y.mpileup	333	0	333	A	G
CitroK_0123A_6:2820429	Inf1_ListDelta.fasta-vs-0116A.mpileup	710	0	710	A	G
CitroK_0123A_6:2820429	Inf1_ListDelta.fasta-vs-0110A.mpileup	675	0	675	A	G
CitroK_0123A_6:2820429	Inf1_ListDelta.fasta-vs-0113A.mpileup	729	0	730	A	G
CitroK_0123A_6:2820429	Inf1_ListDelta.fasta-vs-0120A.mpileup	672	0	674	A	G
CitroK_0123A_6:2820429	Inf1_ListDelta.fasta-vs-0111A.mpileup	640	0	640	A	G
CitroK_0123A_6:2820429	Inf1_ListDelta.fasta-vs-0114A.mpileup	664	0	665	A	G
CitroK_0123A_6:2820429	Inf1_ListDelta.fasta-vs-0117A.mpileup	418	0	419	A	G
CitroK_0123A_6:2820429	Inf1_ListDelta.fasta-vs-0123A.mpileup	443	1	444	A	G
CitroK_0123A_6:2820429	Inf1_ListDelta.fasta-vs-0126A.mpileup	537	1	539	A	G
CitroK_0123A_6:2820429	Inf1_ListDelta.fasta-vs-0118A.mpileup	405	1	406	A	G
CitroK_0123A_6:2820429	Inf1_ListDelta.fasta-vs-0124A.mpileup	480	0	482	A	G
CitroK_0123A_6:2820429	Inf1_ListDelta.fasta-vs-0106W.mpileup	64	0	64	A	G
CitroK_0123A_6:2820429	Inf1_ListDelta.fasta-vs-0112A.mpileup	891	1	892	A	G
CitroK_0123A_6:2820429	Inf1_ListDelta.fasta-vs-0125A.mpileup	572	0	572	A	G
CitroK_0123A_6:2820429	Inf1_ListDelta.fasta-vs-0127A.mpileup	242	0	242	A	G
CitroK_0123A_6:2820429	Inf1_ListDelta.fasta-vs-0106Y.mpileup	670	0	670	A	G
CitroK_0123A_6:2820429	Inf1_ListDelta.fasta-vs-0115A.mpileup	499	0	499	A	G
CitroK_0123A_6:2820429	Inf1_ListDelta.fasta-vs-0119A.mpileup	578	0	579	A	G
CitroK_0123A_6:2820429	Inf1_ListDelta.fasta-vs-0121A.mpileup	552	1	554	A	G
CitroK_0123A_6:3238017	Inf1_ListDelta.fasta-vs-0123W.mpileup	242	242	242	A	A
CitroK_0123A_6:3238017	Inf1_ListDelta.fasta-vs-0123Y.mpileup	278	278	278	A	A
CitroK_0123A_6:3238017	Inf1_ListDelta.fasta-vs-0116A.mpileup	774	774	774	A	A
CitroK_0123A_6:3238017	Inf1_ListDelta.fasta-vs-0110A.mpileup	659	659	660	A	A
CitroK_0123A_6:3238017	Inf1_ListDelta.fasta-vs-0113A.mpileup	841	841	842	A	A
CitroK_0123A_6:3238017	Inf1_ListDelta.fasta-vs-0120A.mpileup	640	640	640	A	A
CitroK_0123A_6:3238017	Inf1_ListDelta.fasta-vs-0111A.mpileup	613	613	614	A	A
CitroK_0123A_6:3238017	Inf1_ListDelta.fasta-vs-0114A.mpileup	713	713	713	A	A
CitroK_0123A_6:3238017	Inf1_ListDelta.fasta-vs-0117A.mpileup	471	471	474	A	A
CitroK_0123A_6:3238017	Inf1_ListDelta.fasta-vs-0123A.mpileup	471	471	471	A	A
CitroK_0123A_6:3238017	Inf1_ListDelta.fasta-vs-0126A.mpileup	553	553	555	A	A
CitroK_0123A_6:3238017	Inf1_ListDelta.fasta-vs-0118A.mpileup	459	459	460	A	A
CitroK_0123A_6:3238017	Inf1_ListDelta.fasta-vs-0124A.mpileup	573	573	574	A	A
CitroK_0123A_6:3238017	Inf1_ListDelta.fasta-vs-0106W.mpileup	72	72	72	A	A
CitroK_0123A_6:3238017	Inf1_ListDelta.fasta-vs-0112A.mpileup	840	840	840	A	A
CitroK_0123A_6:3238017	Inf1_ListDelta.fasta-vs-0125A.mpileup	497	497	505	A	A
CitroK_0123A_6:3238017	Inf1_ListDelta.fasta-vs-0127A.mpileup	202	202	212	A	A
CitroK_0123A_6:3238017	Inf1_ListDelta.fasta-vs-0106Y.mpileup	607	607	609	A	A
CitroK_0123A_6:3238017	Inf1_ListDelta.fasta-vs-0115A.mpileup	555	555	555	A	A
CitroK_0123A_6:3238017	Inf1_ListDelta.fasta-vs-0119A.mpileup	610	610	611	A	A
CitroK_0123A_6:3238017	Inf1_ListDelta.fasta-vs-0121A.mpileup	507	507	507	A	A
CitroK_0123A_6:3238700	Inf1_ListDelta.fasta-vs-0123W.mpileup	251	0	251	T	C
CitroK_0123A_6:3238700	Inf1_ListDelta.fasta-vs-0123Y.mpileup	317	0	317	T	C
CitroK_0123A_6:3238700	Inf1_ListDelta.fasta-vs-0116A.mpileup	756	0	758	T	C
CitroK_0123A_6:3238700	Inf1_ListDelta.fasta-vs-0110A.mpileup	611	0	611	T	C
CitroK_0123A_6:3238700	Inf1_ListDelta.fasta-vs-0113A.mpileup	811	0	813	T	C
CitroK_0123A_6:3238700	Inf1_ListDelta.fasta-vs-0120A.mpileup	660	0	660	T	C
CitroK_0123A_6:3238700	Inf1_ListDelta.fasta-vs-0111A.mpileup	604	0	604	T	C
CitroK_0123A_6:3238700	Inf1_ListDelta.fasta-vs-0114A.mpileup	691	0	691	T	C
CitroK_0123A_6:3238700	Inf1_ListDelta.fasta-vs-0117A.mpileup	388	1	389	T	C
CitroK_0123A_6:3238700	Inf1_ListDelta.fasta-vs-0123A.mpileup	470	0	471	T	C
CitroK_0123A_6:3238700	Inf1_ListDelta.fasta-vs-0126A.mpileup	534	1	536	T	C
CitroK_0123A_6:3238700	Inf1_ListDelta.fasta-vs-0118A.mpileup	463	0	463	T	C
CitroK_0123A_6:3238700	Inf1_ListDelta.fasta-vs-0124A.mpileup	561	0	561	T	C
CitroK_0123A_6:3238700	Inf1_ListDelta.fasta-vs-0106W.mpileup	80	0	80	T	C
CitroK_0123A_6:3238700	Inf1_ListDelta.fasta-vs-0112A.mpileup	832	0	832	T	C
CitroK_0123A_6:3238700	Inf1_ListDelta.fasta-vs-0125A.mpileup	529	2	531	T	C
CitroK_0123A_6:3238700	Inf1_ListDelta.fasta-vs-0127A.mpileup	216	8	224	T	C
CitroK_0123A_6:3238700	Inf1_ListDelta.fasta-vs-0106Y.mpileup	621	0	622	T	C
CitroK_0123A_6:3238700	Inf1_ListDelta.fasta-vs-0115A.mpileup	502	0	502	T	C
CitroK_0123A_6:3238700	Inf1_ListDelta.fasta-vs-0119A.mpileup	556	0	556	T	C
CitroK_0123A_6:3238700	Inf1_ListDelta.fasta-vs-0121A.mpileup	568	1	569	T	C
CitroK_0123A_6:2691629	Inf1_ListDelta.fasta-vs-0123W.mpileup	300	300	301	A	A
CitroK_0123A_6:2691629	Inf1_ListDelta.fasta-vs-0123Y.mpileup	374	374	375	A	A
CitroK_0123A_6:2691629	Inf1_ListDelta.fasta-vs-0116A.mpileup	848	848	848	A	A
CitroK_0123A_6:2691629	Inf1_ListDelta.fasta-vs-0110A.mpileup	721	721	723	A	A
CitroK_0123A_6:2691629	Inf1_ListDelta.fasta-vs-0113A.mpileup	903	903	904	A	A
CitroK_0123A_6:2691629	Inf1_ListDelta.fasta-vs-0120A.mpileup	720	720	720	A	A
CitroK_0123A_6:2691629	Inf1_ListDelta.fasta-vs-0111A.mpileup	767	767	768	A	A
CitroK_0123A_6:2691629	Inf1_ListDelta.fasta-vs-0114A.mpileup	792	792	792	A	A
CitroK_0123A_6:2691629	Inf1_ListDelta.fasta-vs-0117A.mpileup	428	428	429	A	A
CitroK_0123A_6:2691629	Inf1_ListDelta.fasta-vs-0123A.mpileup	488	488	490	A	A
CitroK_0123A_6:2691629	Inf1_ListDelta.fasta-vs-0126A.mpileup	576	576	600	A	A
CitroK_0123A_6:2691629	Inf1_ListDelta.fasta-vs-0118A.mpileup	465	465	466	A	A
CitroK_0123A_6:2691629	Inf1_ListDelta.fasta-vs-0124A.mpileup	578	578	580	A	A
CitroK_0123A_6:2691629	Inf1_ListDelta.fasta-vs-0106W.mpileup	79	79	79	A	A
CitroK_0123A_6:2691629	Inf1_ListDelta.fasta-vs-0112A.mpileup	894	894	894	A	A
CitroK_0123A_6:2691629	Inf1_ListDelta.fasta-vs-0125A.mpileup	592	592	633	A	A
CitroK_0123A_6:2691629	Inf1_ListDelta.fasta-vs-0127A.mpileup	231	231	325	A	A
CitroK_0123A_6:2691629	Inf1_ListDelta.fasta-vs-0106Y.mpileup	765	765	766	A	A
CitroK_0123A_6:2691629	Inf1_ListDelta.fasta-vs-0115A.mpileup	620	620	621	A	A
CitroK_0123A_6:2691629	Inf1_ListDelta.fasta-vs-0119A.mpileup	662	662	662	A	A
CitroK_0123A_6:2691629	Inf1_ListDelta.fasta-vs-0121A.mpileup	617	617	617	A	A
CitroK_0123A_6:1308505	Inf1_ListDelta.fasta-vs-0123W.mpileup	275	0	275	C	A
CitroK_0123A_6:1308505	Inf1_ListDelta.fasta-vs-0123Y.mpileup	325	0	325	C	A
CitroK_0123A_6:1308505	Inf1_ListDelta.fasta-vs-0116A.mpileup	722	0	723	C	A
CitroK_0123A_6:1308505	Inf1_ListDelta.fasta-vs-0110A.mpileup	613	0	613	C	A
CitroK_0123A_6:1308505	Inf1_ListDelta.fasta-vs-0113A.mpileup	715	0	716	C	A
CitroK_0123A_6:1308505	Inf1_ListDelta.fasta-vs-0120A.mpileup	564	0	565	C	A
CitroK_0123A_6:1308505	Inf1_ListDelta.fasta-vs-0111A.mpileup	614	0	615	C	A
CitroK_0123A_6:1308505	Inf1_ListDelta.fasta-vs-0114A.mpileup	713	1	714	C	A
CitroK_0123A_6:1308505	Inf1_ListDelta.fasta-vs-0117A.mpileup	379	1	380	C	A
CitroK_0123A_6:1308505	Inf1_ListDelta.fasta-vs-0123A.mpileup	510	0	510	C	A
CitroK_0123A_6:1308505	Inf1_ListDelta.fasta-vs-0126A.mpileup	596	0	596	C	A
CitroK_0123A_6:1308505	Inf1_ListDelta.fasta-vs-0118A.mpileup	406	0	406	C	A
CitroK_0123A_6:1308505	Inf1_ListDelta.fasta-vs-0124A.mpileup	578	1	580	C	A
CitroK_0123A_6:1308505	Inf1_ListDelta.fasta-vs-0106W.mpileup	82	0	82	C	A
CitroK_0123A_6:1308505	Inf1_ListDelta.fasta-vs-0112A.mpileup	787	0	789	C	A
CitroK_0123A_6:1308505	Inf1_ListDelta.fasta-vs-0125A.mpileup	557	0	557	C	A
CitroK_0123A_6:1308505	Inf1_ListDelta.fasta-vs-0127A.mpileup	217	0	218	C	A
CitroK_0123A_6:1308505	Inf1_ListDelta.fasta-vs-0106Y.mpileup	693	0	693	C	A
CitroK_0123A_6:1308505	Inf1_ListDelta.fasta-vs-0115A.mpileup	497	0	497	C	A
CitroK_0123A_6:1308505	Inf1_ListDelta.fasta-vs-0119A.mpileup	520	0	522	C	A
CitroK_0123A_6:1308505	Inf1_ListDelta.fasta-vs-0121A.mpileup	531	0	531	C	A
CitroK_0123A_6:517175	Inf1_ListDelta.fasta-vs-0123W.mpileup	196	0	196	C	A
CitroK_0123A_6:517175	Inf1_ListDelta.fasta-vs-0123Y.mpileup	314	0	315	C	A
CitroK_0123A_6:517175	Inf1_ListDelta.fasta-vs-0116A.mpileup	721	0	721	C	A
CitroK_0123A_6:517175	Inf1_ListDelta.fasta-vs-0110A.mpileup	573	0	574	C	A
CitroK_0123A_6:517175	Inf1_ListDelta.fasta-vs-0113A.mpileup	699	1	702	C	A
CitroK_0123A_6:517175	Inf1_ListDelta.fasta-vs-0120A.mpileup	574	1	576	C	A
CitroK_0123A_6:517175	Inf1_ListDelta.fasta-vs-0111A.mpileup	530	0	530	C	A
CitroK_0123A_6:517175	Inf1_ListDelta.fasta-vs-0114A.mpileup	606	0	606	C	A
CitroK_0123A_6:517175	Inf1_ListDelta.fasta-vs-0117A.mpileup	412	0	413	C	A
CitroK_0123A_6:517175	Inf1_ListDelta.fasta-vs-0123A.mpileup	447	0	447	C	A
CitroK_0123A_6:517175	Inf1_ListDelta.fasta-vs-0126A.mpileup	489	0	489	C	A
CitroK_0123A_6:517175	Inf1_ListDelta.fasta-vs-0118A.mpileup	390	0	391	C	A
CitroK_0123A_6:517175	Inf1_ListDelta.fasta-vs-0124A.mpileup	470	0	471	C	A
CitroK_0123A_6:517175	Inf1_ListDelta.fasta-vs-0106W.mpileup	82	0	82	C	A
CitroK_0123A_6:517175	Inf1_ListDelta.fasta-vs-0112A.mpileup	745	0	745	C	A
CitroK_0123A_6:517175	Inf1_ListDelta.fasta-vs-0125A.mpileup	525	0	526	C	A
CitroK_0123A_6:517175	Inf1_ListDelta.fasta-vs-0127A.mpileup	214	0	215	C	A
CitroK_0123A_6:517175	Inf1_ListDelta.fasta-vs-0106Y.mpileup	566	0	567	C	A
CitroK_0123A_6:517175	Inf1_ListDelta.fasta-vs-0115A.mpileup	420	0	420	C	A
CitroK_0123A_6:517175	Inf1_ListDelta.fasta-vs-0119A.mpileup	523	0	523	C	A
CitroK_0123A_6:517175	Inf1_ListDelta.fasta-vs-0121A.mpileup	459	0	459	C	A
CitroK_0123A_6:2732214	Inf1_ListDelta.fasta-vs-0123W.mpileup	286	0	286	C	G
CitroK_0123A_6:2732214	Inf1_ListDelta.fasta-vs-0123Y.mpileup	302	0	302	C	G
CitroK_0123A_6:2732214	Inf1_ListDelta.fasta-vs-0116A.mpileup	755	0	755	C	G
CitroK_0123A_6:2732214	Inf1_ListDelta.fasta-vs-0110A.mpileup	666	0	670	C	G
CitroK_0123A_6:2732214	Inf1_ListDelta.fasta-vs-0113A.mpileup	758	0	759	C	G
CitroK_0123A_6:2732214	Inf1_ListDelta.fasta-vs-0120A.mpileup	640	0	640	C	G
CitroK_0123A_6:2732214	Inf1_ListDelta.fasta-vs-0111A.mpileup	592	0	593	C	G
CitroK_0123A_6:2732214	Inf1_ListDelta.fasta-vs-0114A.mpileup	731	1	733	C	G
CitroK_0123A_6:2732214	Inf1_ListDelta.fasta-vs-0117A.mpileup	435	0	437	C	G
CitroK_0123A_6:2732214	Inf1_ListDelta.fasta-vs-0123A.mpileup	490	1	491	C	G
CitroK_0123A_6:2732214	Inf1_ListDelta.fasta-vs-0126A.mpileup	484	1	488	C	G
CitroK_0123A_6:2732214	Inf1_ListDelta.fasta-vs-0118A.mpileup	464	0	466	C	G
CitroK_0123A_6:2732214	Inf1_ListDelta.fasta-vs-0124A.mpileup	545	2	548	C	G
CitroK_0123A_6:2732214	Inf1_ListDelta.fasta-vs-0106W.mpileup	74	0	74	C	G
CitroK_0123A_6:2732214	Inf1_ListDelta.fasta-vs-0112A.mpileup	867	0	868	C	G
CitroK_0123A_6:2732214	Inf1_ListDelta.fasta-vs-0125A.mpileup	549	0	549	C	G
CitroK_0123A_6:2732214	Inf1_ListDelta.fasta-vs-0127A.mpileup	227	0	227	C	G
CitroK_0123A_6:2732214	Inf1_ListDelta.fasta-vs-0106Y.mpileup	682	0	686	C	G
CitroK_0123A_6:2732214	Inf1_ListDelta.fasta-vs-0115A.mpileup	532	0	533	C	G
CitroK_0123A_6:2732214	Inf1_ListDelta.fasta-vs-0119A.mpileup	601	0	601	C	G
CitroK_0123A_6:2732214	Inf1_ListDelta.fasta-vs-0121A.mpileup	545	1	546	C	G
CitroK_0123A_6:2698136	Inf1_ListDelta.fasta-vs-0123W.mpileup	321	0	321	T	A
CitroK_0123A_6:2698136	Inf1_ListDelta.fasta-vs-0123Y.mpileup	395	0	395	T	A
CitroK_0123A_6:2698136	Inf1_ListDelta.fasta-vs-0116A.mpileup	799	0	799	T	A
CitroK_0123A_6:2698136	Inf1_ListDelta.fasta-vs-0110A.mpileup	692	0	692	T	A
CitroK_0123A_6:2698136	Inf1_ListDelta.fasta-vs-0113A.mpileup	911	2	914	T	A
CitroK_0123A_6:2698136	Inf1_ListDelta.fasta-vs-0120A.mpileup	647	0	647	T	A
CitroK_0123A_6:2698136	Inf1_ListDelta.fasta-vs-0111A.mpileup	715	0	715	T	A
CitroK_0123A_6:2698136	Inf1_ListDelta.fasta-vs-0114A.mpileup	746	0	746	T	A
CitroK_0123A_6:2698136	Inf1_ListDelta.fasta-vs-0117A.mpileup	470	0	471	T	A
CitroK_0123A_6:2698136	Inf1_ListDelta.fasta-vs-0123A.mpileup	522	0	522	T	A
CitroK_0123A_6:2698136	Inf1_ListDelta.fasta-vs-0126A.mpileup	568	0	582	T	A
CitroK_0123A_6:2698136	Inf1_ListDelta.fasta-vs-0118A.mpileup	441	0	441	T	A
CitroK_0123A_6:2698136	Inf1_ListDelta.fasta-vs-0124A.mpileup	588	0	588	T	A
CitroK_0123A_6:2698136	Inf1_ListDelta.fasta-vs-0106W.mpileup	76	0	76	T	A
CitroK_0123A_6:2698136	Inf1_ListDelta.fasta-vs-0112A.mpileup	934	0	934	T	A
CitroK_0123A_6:2698136	Inf1_ListDelta.fasta-vs-0125A.mpileup	553	0	598	T	A
CitroK_0123A_6:2698136	Inf1_ListDelta.fasta-vs-0127A.mpileup	245	0	363	T	A
CitroK_0123A_6:2698136	Inf1_ListDelta.fasta-vs-0106Y.mpileup	851	0	852	T	A
CitroK_0123A_6:2698136	Inf1_ListDelta.fasta-vs-0115A.mpileup	573	1	574	T	A
CitroK_0123A_6:2698136	Inf1_ListDelta.fasta-vs-0119A.mpileup	677	0	678	T	A
CitroK_0123A_6:2698136	Inf1_ListDelta.fasta-vs-0121A.mpileup	577	0	577	T	A
CitroK_0123A_6:1971678	Inf1_ListDelta.fasta-vs-0123W.mpileup	336	0	336	T	A
CitroK_0123A_6:1971678	Inf1_ListDelta.fasta-vs-0123Y.mpileup	380	0	380	T	A
CitroK_0123A_6:1971678	Inf1_ListDelta.fasta-vs-0116A.mpileup	795	0	796	T	A
CitroK_0123A_6:1971678	Inf1_ListDelta.fasta-vs-0110A.mpileup	695	1	696	T	A
CitroK_0123A_6:1971678	Inf1_ListDelta.fasta-vs-0113A.mpileup	827	0	829	T	A
CitroK_0123A_6:1971678	Inf1_ListDelta.fasta-vs-0120A.mpileup	670	0	670	T	A
CitroK_0123A_6:1971678	Inf1_ListDelta.fasta-vs-0111A.mpileup	660	0	661	T	A
CitroK_0123A_6:1971678	Inf1_ListDelta.fasta-vs-0114A.mpileup	778	0	778	T	A
CitroK_0123A_6:1971678	Inf1_ListDelta.fasta-vs-0117A.mpileup	463	0	463	T	A
CitroK_0123A_6:1971678	Inf1_ListDelta.fasta-vs-0123A.mpileup	510	0	511	T	A
CitroK_0123A_6:1971678	Inf1_ListDelta.fasta-vs-0126A.mpileup	561	0	567	T	A
CitroK_0123A_6:1971678	Inf1_ListDelta.fasta-vs-0118A.mpileup	482	0	482	T	A
CitroK_0123A_6:1971678	Inf1_ListDelta.fasta-vs-0124A.mpileup	576	1	578	T	A
CitroK_0123A_6:1971678	Inf1_ListDelta.fasta-vs-0106W.mpileup	86	0	86	T	A
CitroK_0123A_6:1971678	Inf1_ListDelta.fasta-vs-0112A.mpileup	904	0	904	T	A
CitroK_0123A_6:1971678	Inf1_ListDelta.fasta-vs-0125A.mpileup	571	1	592	T	A
CitroK_0123A_6:1971678	Inf1_ListDelta.fasta-vs-0127A.mpileup	253	0	288	T	A
CitroK_0123A_6:1971678	Inf1_ListDelta.fasta-vs-0106Y.mpileup	799	0	800	T	A
CitroK_0123A_6:1971678	Inf1_ListDelta.fasta-vs-0115A.mpileup	533	1	534	T	A
CitroK_0123A_6:1971678	Inf1_ListDelta.fasta-vs-0119A.mpileup	679	1	681	T	A
CitroK_0123A_6:1971678	Inf1_ListDelta.fasta-vs-0121A.mpileup	594	1	596	T	A
CitroK_0123A_6:2775471	Inf1_ListDelta.fasta-vs-0123W.mpileup	352	0	352	C	A
CitroK_0123A_6:2775471	Inf1_ListDelta.fasta-vs-0123Y.mpileup	318	1	319	C	A
CitroK_0123A_6:2775471	Inf1_ListDelta.fasta-vs-0116A.mpileup	754	0	754	C	A
CitroK_0123A_6:2775471	Inf1_ListDelta.fasta-vs-0110A.mpileup	636	1	640	C	A
CitroK_0123A_6:2775471	Inf1_ListDelta.fasta-vs-0113A.mpileup	762	1	764	C	A
CitroK_0123A_6:2775471	Inf1_ListDelta.fasta-vs-0120A.mpileup	646	0	646	C	A
CitroK_0123A_6:2775471	Inf1_ListDelta.fasta-vs-0111A.mpileup	629	0	630	C	A
CitroK_0123A_6:2775471	Inf1_ListDelta.fasta-vs-0114A.mpileup	695	1	696	C	A
CitroK_0123A_6:2775471	Inf1_ListDelta.fasta-vs-0117A.mpileup	459	1	461	C	A
CitroK_0123A_6:2775471	Inf1_ListDelta.fasta-vs-0123A.mpileup	488	0	488	C	A
CitroK_0123A_6:2775471	Inf1_ListDelta.fasta-vs-0126A.mpileup	546	0	546	C	A
CitroK_0123A_6:2775471	Inf1_ListDelta.fasta-vs-0118A.mpileup	448	0	448	C	A
CitroK_0123A_6:2775471	Inf1_ListDelta.fasta-vs-0124A.mpileup	509	1	513	C	A
CitroK_0123A_6:2775471	Inf1_ListDelta.fasta-vs-0106W.mpileup	68	1	69	C	A
CitroK_0123A_6:2775471	Inf1_ListDelta.fasta-vs-0112A.mpileup	879	1	881	C	A
CitroK_0123A_6:2775471	Inf1_ListDelta.fasta-vs-0125A.mpileup	492	0	493	C	A
CitroK_0123A_6:2775471	Inf1_ListDelta.fasta-vs-0127A.mpileup	180	0	181	C	A
CitroK_0123A_6:2775471	Inf1_ListDelta.fasta-vs-0106Y.mpileup	732	1	734	C	A
CitroK_0123A_6:2775471	Inf1_ListDelta.fasta-vs-0115A.mpileup	499	0	500	C	A
CitroK_0123A_6:2775471	Inf1_ListDelta.fasta-vs-0119A.mpileup	602	1	603	C	A
CitroK_0123A_6:2775471	Inf1_ListDelta.fasta-vs-0121A.mpileup	549	0	549	C	A
CitroK_0123A_6:2053105	Inf1_ListDelta.fasta-vs-0123W.mpileup	373	0	373	G	A
CitroK_0123A_6:2053105	Inf1_ListDelta.fasta-vs-0123Y.mpileup	394	0	394	G	A
CitroK_0123A_6:2053105	Inf1_ListDelta.fasta-vs-0116A.mpileup	769	0	769	G	A
CitroK_0123A_6:2053105	Inf1_ListDelta.fasta-vs-0110A.mpileup	647	0	647	G	A
CitroK_0123A_6:2053105	Inf1_ListDelta.fasta-vs-0113A.mpileup	796	1	799	G	A
CitroK_0123A_6:2053105	Inf1_ListDelta.fasta-vs-0120A.mpileup	644	1	645	G	A
CitroK_0123A_6:2053105	Inf1_ListDelta.fasta-vs-0111A.mpileup	653	2	655	G	A
CitroK_0123A_6:2053105	Inf1_ListDelta.fasta-vs-0114A.mpileup	722	0	722	G	A
CitroK_0123A_6:2053105	Inf1_ListDelta.fasta-vs-0117A.mpileup	443	1	445	G	A
CitroK_0123A_6:2053105	Inf1_ListDelta.fasta-vs-0123A.mpileup	532	0	533	G	A
CitroK_0123A_6:2053105	Inf1_ListDelta.fasta-vs-0126A.mpileup	585	0	588	G	A
CitroK_0123A_6:2053105	Inf1_ListDelta.fasta-vs-0118A.mpileup	469	0	470	G	A
CitroK_0123A_6:2053105	Inf1_ListDelta.fasta-vs-0124A.mpileup	592	1	594	G	A
CitroK_0123A_6:2053105	Inf1_ListDelta.fasta-vs-0106W.mpileup	62	0	62	G	A
CitroK_0123A_6:2053105	Inf1_ListDelta.fasta-vs-0112A.mpileup	846	0	846	G	A
CitroK_0123A_6:2053105	Inf1_ListDelta.fasta-vs-0125A.mpileup	528	3	533	G	A
CitroK_0123A_6:2053105	Inf1_ListDelta.fasta-vs-0127A.mpileup	247	0	248	G	A
CitroK_0123A_6:2053105	Inf1_ListDelta.fasta-vs-0106Y.mpileup	793	0	794	G	A
CitroK_0123A_6:2053105	Inf1_ListDelta.fasta-vs-0115A.mpileup	517	0	517	G	A
CitroK_0123A_6:2053105	Inf1_ListDelta.fasta-vs-0119A.mpileup	658	1	659	G	A
CitroK_0123A_6:2053105	Inf1_ListDelta.fasta-vs-0121A.mpileup	622	0	622	G	A
CitroK_0123A_6:2682253	Inf1_ListDelta.fasta-vs-0123W.mpileup	304	0	304	T	C
CitroK_0123A_6:2682253	Inf1_ListDelta.fasta-vs-0123Y.mpileup	320	0	320	T	C
CitroK_0123A_6:2682253	Inf1_ListDelta.fasta-vs-0116A.mpileup	368	0	368	T	C
CitroK_0123A_6:2682253	Inf1_ListDelta.fasta-vs-0110A.mpileup	294	0	294	T	C
CitroK_0123A_6:2682253	Inf1_ListDelta.fasta-vs-0113A.mpileup	378	0	379	T	C
CitroK_0123A_6:2682253	Inf1_ListDelta.fasta-vs-0120A.mpileup	323	0	323	T	C
CitroK_0123A_6:2682253	Inf1_ListDelta.fasta-vs-0111A.mpileup	320	0	320	T	C
CitroK_0123A_6:2682253	Inf1_ListDelta.fasta-vs-0114A.mpileup	355	0	355	T	C
CitroK_0123A_6:2682253	Inf1_ListDelta.fasta-vs-0117A.mpileup	193	0	195	T	C
CitroK_0123A_6:2682253	Inf1_ListDelta.fasta-vs-0123A.mpileup	553	0	554	T	C
CitroK_0123A_6:2682253	Inf1_ListDelta.fasta-vs-0126A.mpileup	555	9	564	T	C
CitroK_0123A_6:2682253	Inf1_ListDelta.fasta-vs-0118A.mpileup	231	0	231	T	C
CitroK_0123A_6:2682253	Inf1_ListDelta.fasta-vs-0124A.mpileup	529	0	532	T	C
CitroK_0123A_6:2682253	Inf1_ListDelta.fasta-vs-0106W.mpileup	87	0	87	T	C
CitroK_0123A_6:2682253	Inf1_ListDelta.fasta-vs-0112A.mpileup	442	0	442	T	C
CitroK_0123A_6:2682253	Inf1_ListDelta.fasta-vs-0125A.mpileup	586	29	617	T	C
CitroK_0123A_6:2682253	Inf1_ListDelta.fasta-vs-0127A.mpileup	244	64	308	T	C
CitroK_0123A_6:2682253	Inf1_ListDelta.fasta-vs-0106Y.mpileup	737	0	737	T	C
CitroK_0123A_6:2682253	Inf1_ListDelta.fasta-vs-0115A.mpileup	267	0	267	T	C
CitroK_0123A_6:2682253	Inf1_ListDelta.fasta-vs-0119A.mpileup	283	1	284	T	C
CitroK_0123A_6:2682253	Inf1_ListDelta.fasta-vs-0121A.mpileup	265	1	266	T	C
CitroK_0123A_6:2692471	Inf1_ListDelta.fasta-vs-0123W.mpileup	284	0	284	T	C
CitroK_0123A_6:2692471	Inf1_ListDelta.fasta-vs-0123Y.mpileup	329	0	329	T	C
CitroK_0123A_6:2692471	Inf1_ListDelta.fasta-vs-0116A.mpileup	767	1	769	T	C
CitroK_0123A_6:2692471	Inf1_ListDelta.fasta-vs-0110A.mpileup	658	1	660	T	C
CitroK_0123A_6:2692471	Inf1_ListDelta.fasta-vs-0113A.mpileup	860	1	861	T	C
CitroK_0123A_6:2692471	Inf1_ListDelta.fasta-vs-0120A.mpileup	615	0	615	T	C
CitroK_0123A_6:2692471	Inf1_ListDelta.fasta-vs-0111A.mpileup	690	0	690	T	C
CitroK_0123A_6:2692471	Inf1_ListDelta.fasta-vs-0114A.mpileup	722	0	723	T	C
CitroK_0123A_6:2692471	Inf1_ListDelta.fasta-vs-0117A.mpileup	435	0	437	T	C
CitroK_0123A_6:2692471	Inf1_ListDelta.fasta-vs-0123A.mpileup	523	0	524	T	C
CitroK_0123A_6:2692471	Inf1_ListDelta.fasta-vs-0126A.mpileup	608	1	627	T	C
CitroK_0123A_6:2692471	Inf1_ListDelta.fasta-vs-0118A.mpileup	429	0	429	T	C
CitroK_0123A_6:2692471	Inf1_ListDelta.fasta-vs-0124A.mpileup	583	0	583	T	C
CitroK_0123A_6:2692471	Inf1_ListDelta.fasta-vs-0106W.mpileup	62	0	62	T	C
CitroK_0123A_6:2692471	Inf1_ListDelta.fasta-vs-0112A.mpileup	847	2	849	T	C
CitroK_0123A_6:2692471	Inf1_ListDelta.fasta-vs-0125A.mpileup	555	0	599	T	C
CitroK_0123A_6:2692471	Inf1_ListDelta.fasta-vs-0127A.mpileup	242	0	367	T	C
CitroK_0123A_6:2692471	Inf1_ListDelta.fasta-vs-0106Y.mpileup	792	2	796	T	C
CitroK_0123A_6:2692471	Inf1_ListDelta.fasta-vs-0115A.mpileup	552	2	554	T	C
CitroK_0123A_6:2692471	Inf1_ListDelta.fasta-vs-0119A.mpileup	615	0	616	T	C
CitroK_0123A_6:2692471	Inf1_ListDelta.fasta-vs-0121A.mpileup	578	1	579	T	C
CitroK_0123A_6:2775531	Inf1_ListDelta.fasta-vs-0123W.mpileup	333	0	334	A	T
CitroK_0123A_6:2775531	Inf1_ListDelta.fasta-vs-0123Y.mpileup	319	0	319	A	T
CitroK_0123A_6:2775531	Inf1_ListDelta.fasta-vs-0116A.mpileup	791	0	791	A	T
CitroK_0123A_6:2775531	Inf1_ListDelta.fasta-vs-0110A.mpileup	587	0	587	A	T
CitroK_0123A_6:2775531	Inf1_ListDelta.fasta-vs-0113A.mpileup	721	1	723	A	T
CitroK_0123A_6:2775531	Inf1_ListDelta.fasta-vs-0120A.mpileup	602	0	602	A	T
CitroK_0123A_6:2775531	Inf1_ListDelta.fasta-vs-0111A.mpileup	636	1	637	A	T
CitroK_0123A_6:2775531	Inf1_ListDelta.fasta-vs-0114A.mpileup	668	0	670	A	T
CitroK_0123A_6:2775531	Inf1_ListDelta.fasta-vs-0117A.mpileup	457	0	457	A	T
CitroK_0123A_6:2775531	Inf1_ListDelta.fasta-vs-0123A.mpileup	480	0	480	A	T
CitroK_0123A_6:2775531	Inf1_ListDelta.fasta-vs-0126A.mpileup	516	2	519	A	T
CitroK_0123A_6:2775531	Inf1_ListDelta.fasta-vs-0118A.mpileup	463	0	464	A	T
CitroK_0123A_6:2775531	Inf1_ListDelta.fasta-vs-0124A.mpileup	535	0	537	A	T
CitroK_0123A_6:2775531	Inf1_ListDelta.fasta-vs-0106W.mpileup	70	0	70	A	T
CitroK_0123A_6:2775531	Inf1_ListDelta.fasta-vs-0112A.mpileup	843	0	844	A	T
CitroK_0123A_6:2775531	Inf1_ListDelta.fasta-vs-0125A.mpileup	516	0	517	A	T
CitroK_0123A_6:2775531	Inf1_ListDelta.fasta-vs-0127A.mpileup	185	0	185	A	T
CitroK_0123A_6:2775531	Inf1_ListDelta.fasta-vs-0106Y.mpileup	749	1	753	A	T
CitroK_0123A_6:2775531	Inf1_ListDelta.fasta-vs-0115A.mpileup	484	1	486	A	T
CitroK_0123A_6:2775531	Inf1_ListDelta.fasta-vs-0119A.mpileup	550	1	551	A	T
CitroK_0123A_6:2775531	Inf1_ListDelta.fasta-vs-0121A.mpileup	568	1	569	A	T
CitroK_0123A_6:171804	Inf1_ListDelta.fasta-vs-0123W.mpileup	175	0	175	A	T
CitroK_0123A_6:171804	Inf1_ListDelta.fasta-vs-0123Y.mpileup	224	0	224	A	T
CitroK_0123A_6:171804	Inf1_ListDelta.fasta-vs-0116A.mpileup	597	0	599	A	T
CitroK_0123A_6:171804	Inf1_ListDelta.fasta-vs-0110A.mpileup	482	2	486	A	T
CitroK_0123A_6:171804	Inf1_ListDelta.fasta-vs-0113A.mpileup	656	1	659	A	T
CitroK_0123A_6:171804	Inf1_ListDelta.fasta-vs-0120A.mpileup	473	1	474	A	T
CitroK_0123A_6:171804	Inf1_ListDelta.fasta-vs-0111A.mpileup	479	0	480	A	T
CitroK_0123A_6:171804	Inf1_ListDelta.fasta-vs-0114A.mpileup	565	0	567	A	T
CitroK_0123A_6:171804	Inf1_ListDelta.fasta-vs-0117A.mpileup	298	0	301	A	T
CitroK_0123A_6:171804	Inf1_ListDelta.fasta-vs-0123A.mpileup	336	0	336	A	T
CitroK_0123A_6:171804	Inf1_ListDelta.fasta-vs-0126A.mpileup	367	1	370	A	T
CitroK_0123A_6:171804	Inf1_ListDelta.fasta-vs-0118A.mpileup	354	0	354	A	T
CitroK_0123A_6:171804	Inf1_ListDelta.fasta-vs-0124A.mpileup	418	2	423	A	T
CitroK_0123A_6:171804	Inf1_ListDelta.fasta-vs-0106W.mpileup	50	0	50	A	T
CitroK_0123A_6:171804	Inf1_ListDelta.fasta-vs-0112A.mpileup	674	2	677	A	T
CitroK_0123A_6:171804	Inf1_ListDelta.fasta-vs-0125A.mpileup	389	2	391	A	T
CitroK_0123A_6:171804	Inf1_ListDelta.fasta-vs-0127A.mpileup	177	1	178	A	T
CitroK_0123A_6:171804	Inf1_ListDelta.fasta-vs-0106Y.mpileup	438	1	439	A	T
CitroK_0123A_6:171804	Inf1_ListDelta.fasta-vs-0115A.mpileup	418	0	421	A	T
CitroK_0123A_6:171804	Inf1_ListDelta.fasta-vs-0119A.mpileup	471	1	476	A	T
CitroK_0123A_6:171804	Inf1_ListDelta.fasta-vs-0121A.mpileup	432	1	434	A	T
CitroK_0123A_6:413646	Inf1_ListDelta.fasta-vs-0123W.mpileup	238	0	238	C	A
CitroK_0123A_6:413646	Inf1_ListDelta.fasta-vs-0123Y.mpileup	271	0	271	C	A
CitroK_0123A_6:413646	Inf1_ListDelta.fasta-vs-0116A.mpileup	707	0	707	C	A
CitroK_0123A_6:413646	Inf1_ListDelta.fasta-vs-0110A.mpileup	559	0	559	C	A
CitroK_0123A_6:413646	Inf1_ListDelta.fasta-vs-0113A.mpileup	651	0	651	C	A
CitroK_0123A_6:413646	Inf1_ListDelta.fasta-vs-0120A.mpileup	538	0	538	C	A
CitroK_0123A_6:413646	Inf1_ListDelta.fasta-vs-0111A.mpileup	523	1	524	C	A
CitroK_0123A_6:413646	Inf1_ListDelta.fasta-vs-0114A.mpileup	628	0	629	C	A
CitroK_0123A_6:413646	Inf1_ListDelta.fasta-vs-0117A.mpileup	332	1	333	C	A
CitroK_0123A_6:413646	Inf1_ListDelta.fasta-vs-0123A.mpileup	416	0	417	C	A
CitroK_0123A_6:413646	Inf1_ListDelta.fasta-vs-0126A.mpileup	420	0	420	C	A
CitroK_0123A_6:413646	Inf1_ListDelta.fasta-vs-0118A.mpileup	351	0	351	C	A
CitroK_0123A_6:413646	Inf1_ListDelta.fasta-vs-0124A.mpileup	428	0	428	C	A
CitroK_0123A_6:413646	Inf1_ListDelta.fasta-vs-0106W.mpileup	42	0	42	C	A
CitroK_0123A_6:413646	Inf1_ListDelta.fasta-vs-0112A.mpileup	669	0	669	C	A
CitroK_0123A_6:413646	Inf1_ListDelta.fasta-vs-0125A.mpileup	430	1	431	C	A
CitroK_0123A_6:413646	Inf1_ListDelta.fasta-vs-0127A.mpileup	195	1	197	C	A
CitroK_0123A_6:413646	Inf1_ListDelta.fasta-vs-0106Y.mpileup	536	3	539	C	A
CitroK_0123A_6:413646	Inf1_ListDelta.fasta-vs-0115A.mpileup	410	1	411	C	A
CitroK_0123A_6:413646	Inf1_ListDelta.fasta-vs-0119A.mpileup	480	0	481	C	A
CitroK_0123A_6:413646	Inf1_ListDelta.fasta-vs-0121A.mpileup	477	0	477	C	A
CitroK_0123A_6:3450796	Inf1_ListDelta.fasta-vs-0123W.mpileup	278	0	278	T	A
CitroK_0123A_6:3450796	Inf1_ListDelta.fasta-vs-0123Y.mpileup	353	0	353	T	A
CitroK_0123A_6:3450796	Inf1_ListDelta.fasta-vs-0116A.mpileup	744	1	746	T	A
CitroK_0123A_6:3450796	Inf1_ListDelta.fasta-vs-0110A.mpileup	646	2	648	T	A
CitroK_0123A_6:3450796	Inf1_ListDelta.fasta-vs-0113A.mpileup	914	0	916	T	A
CitroK_0123A_6:3450796	Inf1_ListDelta.fasta-vs-0120A.mpileup	578	0	580	T	A
CitroK_0123A_6:3450796	Inf1_ListDelta.fasta-vs-0111A.mpileup	770	1	772	T	A
CitroK_0123A_6:3450796	Inf1_ListDelta.fasta-vs-0114A.mpileup	667	0	668	T	A
CitroK_0123A_6:3450796	Inf1_ListDelta.fasta-vs-0117A.mpileup	443	0	443	T	A
CitroK_0123A_6:3450796	Inf1_ListDelta.fasta-vs-0123A.mpileup	399	0	399	T	A
CitroK_0123A_6:3450796	Inf1_ListDelta.fasta-vs-0126A.mpileup	654	0	675	T	A
CitroK_0123A_6:3450796	Inf1_ListDelta.fasta-vs-0118A.mpileup	404	0	404	T	A
CitroK_0123A_6:3450796	Inf1_ListDelta.fasta-vs-0124A.mpileup	633	0	634	T	A
CitroK_0123A_6:3450796	Inf1_ListDelta.fasta-vs-0106W.mpileup	71	0	71	T	A
CitroK_0123A_6:3450796	Inf1_ListDelta.fasta-vs-0112A.mpileup	747	0	749	T	A
CitroK_0123A_6:3450796	Inf1_ListDelta.fasta-vs-0125A.mpileup	541	2	582	T	A
CitroK_0123A_6:3450796	Inf1_ListDelta.fasta-vs-0127A.mpileup	319	0	410	T	A
CitroK_0123A_6:3450796	Inf1_ListDelta.fasta-vs-0106Y.mpileup	769	0	769	T	A
CitroK_0123A_6:3450796	Inf1_ListDelta.fasta-vs-0115A.mpileup	611	3	614	T	A
CitroK_0123A_6:3450796	Inf1_ListDelta.fasta-vs-0119A.mpileup	688	0	689	T	A
CitroK_0123A_6:3450796	Inf1_ListDelta.fasta-vs-0121A.mpileup	598	2	601	T	A
CitroK_0123A_6:1625872	Inf1_ListDelta.fasta-vs-0123W.mpileup	264	0	264	G	A
CitroK_0123A_6:1625872	Inf1_ListDelta.fasta-vs-0123Y.mpileup	361	0	361	G	A
CitroK_0123A_6:1625872	Inf1_ListDelta.fasta-vs-0116A.mpileup	778	0	779	G	A
CitroK_0123A_6:1625872	Inf1_ListDelta.fasta-vs-0110A.mpileup	563	1	564	G	A
CitroK_0123A_6:1625872	Inf1_ListDelta.fasta-vs-0113A.mpileup	854	1	856	G	A
CitroK_0123A_6:1625872	Inf1_ListDelta.fasta-vs-0120A.mpileup	614	1	615	G	A
CitroK_0123A_6:1625872	Inf1_ListDelta.fasta-vs-0111A.mpileup	615	0	615	G	A
CitroK_0123A_6:1625872	Inf1_ListDelta.fasta-vs-0114A.mpileup	686	0	686	G	A
CitroK_0123A_6:1625872	Inf1_ListDelta.fasta-vs-0117A.mpileup	417	1	420	G	A
CitroK_0123A_6:1625872	Inf1_ListDelta.fasta-vs-0123A.mpileup	519	0	520	G	A
CitroK_0123A_6:1625872	Inf1_ListDelta.fasta-vs-0126A.mpileup	494	1	495	G	A
CitroK_0123A_6:1625872	Inf1_ListDelta.fasta-vs-0118A.mpileup	460	2	462	G	A
CitroK_0123A_6:1625872	Inf1_ListDelta.fasta-vs-0124A.mpileup	548	0	551	G	A
CitroK_0123A_6:1625872	Inf1_ListDelta.fasta-vs-0106W.mpileup	72	0	72	G	A
CitroK_0123A_6:1625872	Inf1_ListDelta.fasta-vs-0112A.mpileup	810	0	810	G	A
CitroK_0123A_6:1625872	Inf1_ListDelta.fasta-vs-0125A.mpileup	557	1	558	G	A
CitroK_0123A_6:1625872	Inf1_ListDelta.fasta-vs-0127A.mpileup	262	1	264	G	A
CitroK_0123A_6:1625872	Inf1_ListDelta.fasta-vs-0106Y.mpileup	682	0	683	G	A
CitroK_0123A_6:1625872	Inf1_ListDelta.fasta-vs-0115A.mpileup	507	1	509	G	A
CitroK_0123A_6:1625872	Inf1_ListDelta.fasta-vs-0119A.mpileup	537	1	540	G	A
CitroK_0123A_6:1625872	Inf1_ListDelta.fasta-vs-0121A.mpileup	487	0	487	G	A
CitroK_0123A_6:2269922	Inf1_ListDelta.fasta-vs-0123W.mpileup	337	0	337	G	A
CitroK_0123A_6:2269922	Inf1_ListDelta.fasta-vs-0123Y.mpileup	401	0	401	G	A
CitroK_0123A_6:2269922	Inf1_ListDelta.fasta-vs-0116A.mpileup	802	0	802	G	A
CitroK_0123A_6:2269922	Inf1_ListDelta.fasta-vs-0110A.mpileup	600	0	601	G	A
CitroK_0123A_6:2269922	Inf1_ListDelta.fasta-vs-0113A.mpileup	753	0	753	G	A
CitroK_0123A_6:2269922	Inf1_ListDelta.fasta-vs-0120A.mpileup	627	2	629	G	A
CitroK_0123A_6:2269922	Inf1_ListDelta.fasta-vs-0111A.mpileup	623	0	623	G	A
CitroK_0123A_6:2269922	Inf1_ListDelta.fasta-vs-0114A.mpileup	670	2	673	G	A
CitroK_0123A_6:2269922	Inf1_ListDelta.fasta-vs-0117A.mpileup	418	0	418	G	A
CitroK_0123A_6:2269922	Inf1_ListDelta.fasta-vs-0123A.mpileup	468	0	468	G	A
CitroK_0123A_6:2269922	Inf1_ListDelta.fasta-vs-0126A.mpileup	530	2	533	G	A
CitroK_0123A_6:2269922	Inf1_ListDelta.fasta-vs-0118A.mpileup	441	0	442	G	A
CitroK_0123A_6:2269922	Inf1_ListDelta.fasta-vs-0124A.mpileup	552	0	553	G	A
CitroK_0123A_6:2269922	Inf1_ListDelta.fasta-vs-0106W.mpileup	110	0	110	G	A
CitroK_0123A_6:2269922	Inf1_ListDelta.fasta-vs-0112A.mpileup	822	0	822	G	A
CitroK_0123A_6:2269922	Inf1_ListDelta.fasta-vs-0125A.mpileup	539	1	541	G	A
CitroK_0123A_6:2269922	Inf1_ListDelta.fasta-vs-0127A.mpileup	209	1	210	G	A
CitroK_0123A_6:2269922	Inf1_ListDelta.fasta-vs-0106Y.mpileup	734	0	735	G	A
CitroK_0123A_6:2269922	Inf1_ListDelta.fasta-vs-0115A.mpileup	518	1	519	G	A
CitroK_0123A_6:2269922	Inf1_ListDelta.fasta-vs-0119A.mpileup	600	0	600	G	A
CitroK_0123A_6:2269922	Inf1_ListDelta.fasta-vs-0121A.mpileup	524	0	524	G	A
CitroK_0123A_6:3172078	Inf1_ListDelta.fasta-vs-0123W.mpileup	114	43	157	T	C
CitroK_0123A_6:3172078	Inf1_ListDelta.fasta-vs-0123Y.mpileup	155	48	203	T	C
CitroK_0123A_6:3172078	Inf1_ListDelta.fasta-vs-0116A.mpileup	621	30	652	T	C
CitroK_0123A_6:3172078	Inf1_ListDelta.fasta-vs-0110A.mpileup	537	45	582	T	C
CitroK_0123A_6:3172078	Inf1_ListDelta.fasta-vs-0113A.mpileup	482	55	540	T	C
CitroK_0123A_6:3172078	Inf1_ListDelta.fasta-vs-0120A.mpileup	530	37	568	T	C
CitroK_0123A_6:3172078	Inf1_ListDelta.fasta-vs-0111A.mpileup	410	51	461	T	C
CitroK_0123A_6:3172078	Inf1_ListDelta.fasta-vs-0114A.mpileup	583	36	619	T	C
CitroK_0123A_6:3172078	Inf1_ListDelta.fasta-vs-0117A.mpileup	275	31	306	T	C
CitroK_0123A_6:3172078	Inf1_ListDelta.fasta-vs-0123A.mpileup	450	15	466	T	C
CitroK_0123A_6:3172078	Inf1_ListDelta.fasta-vs-0126A.mpileup	358	43	401	T	C
CitroK_0123A_6:3172078	Inf1_ListDelta.fasta-vs-0118A.mpileup	373	18	391	T	C
CitroK_0123A_6:3172078	Inf1_ListDelta.fasta-vs-0124A.mpileup	401	32	433	T	C
CitroK_0123A_6:3172078	Inf1_ListDelta.fasta-vs-0106W.mpileup	24	22	46	T	C
CitroK_0123A_6:3172078	Inf1_ListDelta.fasta-vs-0112A.mpileup	739	36	776	T	C
CitroK_0123A_6:3172078	Inf1_ListDelta.fasta-vs-0125A.mpileup	510	17	527	T	C
CitroK_0123A_6:3172078	Inf1_ListDelta.fasta-vs-0127A.mpileup	182	12	194	T	C
CitroK_0123A_6:3172078	Inf1_ListDelta.fasta-vs-0106Y.mpileup	349	86	435	T	C
CitroK_0123A_6:3172078	Inf1_ListDelta.fasta-vs-0115A.mpileup	336	46	382	T	C
CitroK_0123A_6:3172078	Inf1_ListDelta.fasta-vs-0119A.mpileup	429	48	477	T	C
CitroK_0123A_6:3172078	Inf1_ListDelta.fasta-vs-0121A.mpileup	397	43	441	T	C
CitroK_0123A_6:1369352	Inf1_ListDelta.fasta-vs-0123W.mpileup	245	0	245	A	C
CitroK_0123A_6:1369352	Inf1_ListDelta.fasta-vs-0123Y.mpileup	330	0	331	A	C
CitroK_0123A_6:1369352	Inf1_ListDelta.fasta-vs-0116A.mpileup	789	0	789	A	C
CitroK_0123A_6:1369352	Inf1_ListDelta.fasta-vs-0110A.mpileup	632	1	633	A	C
CitroK_0123A_6:1369352	Inf1_ListDelta.fasta-vs-0113A.mpileup	775	2	777	A	C
CitroK_0123A_6:1369352	Inf1_ListDelta.fasta-vs-0120A.mpileup	625	0	626	A	C
CitroK_0123A_6:1369352	Inf1_ListDelta.fasta-vs-0111A.mpileup	613	0	615	A	C
CitroK_0123A_6:1369352	Inf1_ListDelta.fasta-vs-0114A.mpileup	702	1	704	A	C
CitroK_0123A_6:1369352	Inf1_ListDelta.fasta-vs-0117A.mpileup	409	2	412	A	C
CitroK_0123A_6:1369352	Inf1_ListDelta.fasta-vs-0123A.mpileup	457	0	457	A	C
CitroK_0123A_6:1369352	Inf1_ListDelta.fasta-vs-0126A.mpileup	485	0	485	A	C
CitroK_0123A_6:1369352	Inf1_ListDelta.fasta-vs-0118A.mpileup	407	1	408	A	C
CitroK_0123A_6:1369352	Inf1_ListDelta.fasta-vs-0124A.mpileup	455	1	457	A	C
CitroK_0123A_6:1369352	Inf1_ListDelta.fasta-vs-0106W.mpileup	60	0	60	A	C
CitroK_0123A_6:1369352	Inf1_ListDelta.fasta-vs-0112A.mpileup	840	1	842	A	C
CitroK_0123A_6:1369352	Inf1_ListDelta.fasta-vs-0125A.mpileup	528	0	528	A	C
CitroK_0123A_6:1369352	Inf1_ListDelta.fasta-vs-0127A.mpileup	237	0	238	A	C
CitroK_0123A_6:1369352	Inf1_ListDelta.fasta-vs-0106Y.mpileup	623	1	625	A	C
CitroK_0123A_6:1369352	Inf1_ListDelta.fasta-vs-0115A.mpileup	476	5	481	A	C
CitroK_0123A_6:1369352	Inf1_ListDelta.fasta-vs-0119A.mpileup	546	1	547	A	C
CitroK_0123A_6:1369352	Inf1_ListDelta.fasta-vs-0121A.mpileup	508	1	509	A	C
CitroK_0123A_6:2712940	Inf1_ListDelta.fasta-vs-0123W.mpileup	307	0	307	G	A
CitroK_0123A_6:2712940	Inf1_ListDelta.fasta-vs-0123Y.mpileup	393	0	393	G	A
CitroK_0123A_6:2712940	Inf1_ListDelta.fasta-vs-0116A.mpileup	893	1	896	G	A
CitroK_0123A_6:2712940	Inf1_ListDelta.fasta-vs-0110A.mpileup	711	0	712	G	A
CitroK_0123A_6:2712940	Inf1_ListDelta.fasta-vs-0113A.mpileup	734	1	736	G	A
CitroK_0123A_6:2712940	Inf1_ListDelta.fasta-vs-0120A.mpileup	680	1	683	G	A
CitroK_0123A_6:2712940	Inf1_ListDelta.fasta-vs-0111A.mpileup	652	0	653	G	A
CitroK_0123A_6:2712940	Inf1_ListDelta.fasta-vs-0114A.mpileup	798	0	798	G	A
CitroK_0123A_6:2712940	Inf1_ListDelta.fasta-vs-0117A.mpileup	448	0	448	G	A
CitroK_0123A_6:2712940	Inf1_ListDelta.fasta-vs-0123A.mpileup	590	1	591	G	A
CitroK_0123A_6:2712940	Inf1_ListDelta.fasta-vs-0126A.mpileup	566	1	587	G	A
CitroK_0123A_6:2712940	Inf1_ListDelta.fasta-vs-0118A.mpileup	498	0	499	G	A
CitroK_0123A_6:2712940	Inf1_ListDelta.fasta-vs-0124A.mpileup	545	2	549	G	A
CitroK_0123A_6:2712940	Inf1_ListDelta.fasta-vs-0106W.mpileup	81	0	82	G	A
CitroK_0123A_6:2712940	Inf1_ListDelta.fasta-vs-0112A.mpileup	930	3	933	G	A
CitroK_0123A_6:2712940	Inf1_ListDelta.fasta-vs-0125A.mpileup	609	0	651	G	A
CitroK_0123A_6:2712940	Inf1_ListDelta.fasta-vs-0127A.mpileup	289	1	373	G	A
CitroK_0123A_6:2712940	Inf1_ListDelta.fasta-vs-0106Y.mpileup	757	0	757	G	A
CitroK_0123A_6:2712940	Inf1_ListDelta.fasta-vs-0115A.mpileup	529	0	529	G	A
CitroK_0123A_6:2712940	Inf1_ListDelta.fasta-vs-0119A.mpileup	551	0	552	G	A
CitroK_0123A_6:2712940	Inf1_ListDelta.fasta-vs-0121A.mpileup	554	0	554	G	A
CitroK_0123A_6:488581	Inf1_ListDelta.fasta-vs-0123W.mpileup	207	207	207	A	A
CitroK_0123A_6:488581	Inf1_ListDelta.fasta-vs-0123Y.mpileup	313	313	314	A	A
CitroK_0123A_6:488581	Inf1_ListDelta.fasta-vs-0116A.mpileup	386	386	386	A	A
CitroK_0123A_6:488581	Inf1_ListDelta.fasta-vs-0110A.mpileup	306	306	306	A	A
CitroK_0123A_6:488581	Inf1_ListDelta.fasta-vs-0113A.mpileup	374	374	375	A	A
CitroK_0123A_6:488581	Inf1_ListDelta.fasta-vs-0120A.mpileup	336	336	336	A	A
CitroK_0123A_6:488581	Inf1_ListDelta.fasta-vs-0111A.mpileup	304	304	304	A	A
CitroK_0123A_6:488581	Inf1_ListDelta.fasta-vs-0114A.mpileup	367	367	367	A	A
CitroK_0123A_6:488581	Inf1_ListDelta.fasta-vs-0117A.mpileup	188	188	188	A	A
CitroK_0123A_6:488581	Inf1_ListDelta.fasta-vs-0123A.mpileup	452	452	453	A	A
CitroK_0123A_6:488581	Inf1_ListDelta.fasta-vs-0126A.mpileup	437	437	438	A	A
CitroK_0123A_6:488581	Inf1_ListDelta.fasta-vs-0118A.mpileup	231	231	231	A	A
CitroK_0123A_6:488581	Inf1_ListDelta.fasta-vs-0124A.mpileup	458	458	459	A	A
CitroK_0123A_6:488581	Inf1_ListDelta.fasta-vs-0106W.mpileup	68	68	68	A	A
CitroK_0123A_6:488581	Inf1_ListDelta.fasta-vs-0112A.mpileup	421	421	422	A	A
CitroK_0123A_6:488581	Inf1_ListDelta.fasta-vs-0125A.mpileup	543	543	543	A	A
CitroK_0123A_6:488581	Inf1_ListDelta.fasta-vs-0127A.mpileup	208	208	209	A	A
CitroK_0123A_6:488581	Inf1_ListDelta.fasta-vs-0106Y.mpileup	515	515	516	A	A
CitroK_0123A_6:488581	Inf1_ListDelta.fasta-vs-0115A.mpileup	236	236	236	A	A
CitroK_0123A_6:488581	Inf1_ListDelta.fasta-vs-0119A.mpileup	270	270	271	A	A
CitroK_0123A_6:488581	Inf1_ListDelta.fasta-vs-0121A.mpileup	264	264	264	A	A
CitroK_0123A_6:2235245	Inf1_ListDelta.fasta-vs-0123W.mpileup	382	2	385	T	A
CitroK_0123A_6:2235245	Inf1_ListDelta.fasta-vs-0123Y.mpileup	384	0	384	T	A
CitroK_0123A_6:2235245	Inf1_ListDelta.fasta-vs-0116A.mpileup	836	0	836	T	A
CitroK_0123A_6:2235245	Inf1_ListDelta.fasta-vs-0110A.mpileup	695	0	695	T	A
CitroK_0123A_6:2235245	Inf1_ListDelta.fasta-vs-0113A.mpileup	853	0	853	T	A
CitroK_0123A_6:2235245	Inf1_ListDelta.fasta-vs-0120A.mpileup	728	1	729	T	A
CitroK_0123A_6:2235245	Inf1_ListDelta.fasta-vs-0111A.mpileup	718	0	720	T	A
CitroK_0123A_6:2235245	Inf1_ListDelta.fasta-vs-0114A.mpileup	771	0	771	T	A
CitroK_0123A_6:2235245	Inf1_ListDelta.fasta-vs-0117A.mpileup	479	0	479	T	A
CitroK_0123A_6:2235245	Inf1_ListDelta.fasta-vs-0123A.mpileup	567	0	567	T	A
CitroK_0123A_6:2235245	Inf1_ListDelta.fasta-vs-0126A.mpileup	617	0	645	T	A
CitroK_0123A_6:2235245	Inf1_ListDelta.fasta-vs-0118A.mpileup	542	0	543	T	A
CitroK_0123A_6:2235245	Inf1_ListDelta.fasta-vs-0124A.mpileup	595	0	595	T	A
CitroK_0123A_6:2235245	Inf1_ListDelta.fasta-vs-0106W.mpileup	101	0	101	T	A
CitroK_0123A_6:2235245	Inf1_ListDelta.fasta-vs-0112A.mpileup	1003	0	1003	T	A
CitroK_0123A_6:2235245	Inf1_ListDelta.fasta-vs-0125A.mpileup	609	0	665	T	A
CitroK_0123A_6:2235245	Inf1_ListDelta.fasta-vs-0127A.mpileup	255	0	378	T	A
CitroK_0123A_6:2235245	Inf1_ListDelta.fasta-vs-0106Y.mpileup	836	0	839	T	A
CitroK_0123A_6:2235245	Inf1_ListDelta.fasta-vs-0115A.mpileup	566	0	566	T	A
CitroK_0123A_6:2235245	Inf1_ListDelta.fasta-vs-0119A.mpileup	625	0	625	T	A
CitroK_0123A_6:2235245	Inf1_ListDelta.fasta-vs-0121A.mpileup	601	0	601	T	A
CitroK_0123A_6:2823300	Inf1_ListDelta.fasta-vs-0123W.mpileup	299	0	299	C	A
CitroK_0123A_6:2823300	Inf1_ListDelta.fasta-vs-0123Y.mpileup	389	0	389	C	A
CitroK_0123A_6:2823300	Inf1_ListDelta.fasta-vs-0116A.mpileup	806	0	806	C	A
CitroK_0123A_6:2823300	Inf1_ListDelta.fasta-vs-0110A.mpileup	704	0	705	C	A
CitroK_0123A_6:2823300	Inf1_ListDelta.fasta-vs-0113A.mpileup	786	0	786	C	A
CitroK_0123A_6:2823300	Inf1_ListDelta.fasta-vs-0120A.mpileup	677	0	678	C	A
CitroK_0123A_6:2823300	Inf1_ListDelta.fasta-vs-0111A.mpileup	680	0	680	C	A
CitroK_0123A_6:2823300	Inf1_ListDelta.fasta-vs-0114A.mpileup	749	2	753	C	A
CitroK_0123A_6:2823300	Inf1_ListDelta.fasta-vs-0117A.mpileup	436	0	436	C	A
CitroK_0123A_6:2823300	Inf1_ListDelta.fasta-vs-0123A.mpileup	522	0	522	C	A
CitroK_0123A_6:2823300	Inf1_ListDelta.fasta-vs-0126A.mpileup	589	1	590	C	A
CitroK_0123A_6:2823300	Inf1_ListDelta.fasta-vs-0118A.mpileup	443	0	443	C	A
CitroK_0123A_6:2823300	Inf1_ListDelta.fasta-vs-0124A.mpileup	543	0	545	C	A
CitroK_0123A_6:2823300	Inf1_ListDelta.fasta-vs-0106W.mpileup	74	0	74	C	A
CitroK_0123A_6:2823300	Inf1_ListDelta.fasta-vs-0112A.mpileup	895	0	895	C	A
CitroK_0123A_6:2823300	Inf1_ListDelta.fasta-vs-0125A.mpileup	627	0	641	C	A
CitroK_0123A_6:2823300	Inf1_ListDelta.fasta-vs-0127A.mpileup	268	0	288	C	A
CitroK_0123A_6:2823300	Inf1_ListDelta.fasta-vs-0106Y.mpileup	800	1	802	C	A
CitroK_0123A_6:2823300	Inf1_ListDelta.fasta-vs-0115A.mpileup	503	1	504	C	A
CitroK_0123A_6:2823300	Inf1_ListDelta.fasta-vs-0119A.mpileup	609	0	609	C	A
CitroK_0123A_6:2823300	Inf1_ListDelta.fasta-vs-0121A.mpileup	563	0	563	C	A
CitroK_0123A_6:1583770	Inf1_ListDelta.fasta-vs-0123W.mpileup	278	1	279	G	A
CitroK_0123A_6:1583770	Inf1_ListDelta.fasta-vs-0123Y.mpileup	301	0	305	G	A
CitroK_0123A_6:1583770	Inf1_ListDelta.fasta-vs-0116A.mpileup	656	2	662	G	A
CitroK_0123A_6:1583770	Inf1_ListDelta.fasta-vs-0110A.mpileup	561	2	565	G	A
CitroK_0123A_6:1583770	Inf1_ListDelta.fasta-vs-0113A.mpileup	774	0	781	G	A
CitroK_0123A_6:1583770	Inf1_ListDelta.fasta-vs-0120A.mpileup	529	0	532	G	A
CitroK_0123A_6:1583770	Inf1_ListDelta.fasta-vs-0111A.mpileup	545	0	549	G	A
CitroK_0123A_6:1583770	Inf1_ListDelta.fasta-vs-0114A.mpileup	607	0	612	G	A
CitroK_0123A_6:1583770	Inf1_ListDelta.fasta-vs-0117A.mpileup	337	1	341	G	A
CitroK_0123A_6:1583770	Inf1_ListDelta.fasta-vs-0123A.mpileup	511	1	512	G	A
CitroK_0123A_6:1583770	Inf1_ListDelta.fasta-vs-0126A.mpileup	586	1	612	G	A
CitroK_0123A_6:1583770	Inf1_ListDelta.fasta-vs-0118A.mpileup	349	1	351	G	A
CitroK_0123A_6:1583770	Inf1_ListDelta.fasta-vs-0124A.mpileup	666	1	668	G	A
CitroK_0123A_6:1583770	Inf1_ListDelta.fasta-vs-0106W.mpileup	47	0	47	G	A
CitroK_0123A_6:1583770	Inf1_ListDelta.fasta-vs-0112A.mpileup	693	0	698	G	A
CitroK_0123A_6:1583770	Inf1_ListDelta.fasta-vs-0125A.mpileup	612	1	650	G	A
CitroK_0123A_6:1583770	Inf1_ListDelta.fasta-vs-0127A.mpileup	237	0	345	G	A
CitroK_0123A_6:1583770	Inf1_ListDelta.fasta-vs-0106Y.mpileup	715	1	719	G	A
CitroK_0123A_6:1583770	Inf1_ListDelta.fasta-vs-0115A.mpileup	505	1	509	G	A
CitroK_0123A_6:1583770	Inf1_ListDelta.fasta-vs-0119A.mpileup	522	3	526	G	A
CitroK_0123A_6:1583770	Inf1_ListDelta.fasta-vs-0121A.mpileup	428	1	430	G	A
CitroK_0123A_6:1973325	Inf1_ListDelta.fasta-vs-0123W.mpileup	320	0	320	G	A
CitroK_0123A_6:1973325	Inf1_ListDelta.fasta-vs-0123Y.mpileup	405	0	406	G	A
CitroK_0123A_6:1973325	Inf1_ListDelta.fasta-vs-0116A.mpileup	821	0	822	G	A
CitroK_0123A_6:1973325	Inf1_ListDelta.fasta-vs-0110A.mpileup	694	0	695	G	A
CitroK_0123A_6:1973325	Inf1_ListDelta.fasta-vs-0113A.mpileup	880	0	881	G	A
CitroK_0123A_6:1973325	Inf1_ListDelta.fasta-vs-0120A.mpileup	696	3	700	G	A
CitroK_0123A_6:1973325	Inf1_ListDelta.fasta-vs-0111A.mpileup	708	1	710	G	A
CitroK_0123A_6:1973325	Inf1_ListDelta.fasta-vs-0114A.mpileup	801	0	801	G	A
CitroK_0123A_6:1973325	Inf1_ListDelta.fasta-vs-0117A.mpileup	448	0	448	G	A
CitroK_0123A_6:1973325	Inf1_ListDelta.fasta-vs-0123A.mpileup	551	1	552	G	A
CitroK_0123A_6:1973325	Inf1_ListDelta.fasta-vs-0126A.mpileup	605	25	631	G	A
CitroK_0123A_6:1973325	Inf1_ListDelta.fasta-vs-0118A.mpileup	546	0	546	G	A
CitroK_0123A_6:1973325	Inf1_ListDelta.fasta-vs-0124A.mpileup	587	1	589	G	A
CitroK_0123A_6:1973325	Inf1_ListDelta.fasta-vs-0106W.mpileup	92	0	92	G	A
CitroK_0123A_6:1973325	Inf1_ListDelta.fasta-vs-0112A.mpileup	938	0	939	G	A
CitroK_0123A_6:1973325	Inf1_ListDelta.fasta-vs-0125A.mpileup	619	51	672	G	A
CitroK_0123A_6:1973325	Inf1_ListDelta.fasta-vs-0127A.mpileup	243	102	345	G	A
CitroK_0123A_6:1973325	Inf1_ListDelta.fasta-vs-0106Y.mpileup	779	0	781	G	A
CitroK_0123A_6:1973325	Inf1_ListDelta.fasta-vs-0115A.mpileup	544	1	545	G	A
CitroK_0123A_6:1973325	Inf1_ListDelta.fasta-vs-0119A.mpileup	686	1	688	G	A
CitroK_0123A_6:1973325	Inf1_ListDelta.fasta-vs-0121A.mpileup	588	1	589	G	A
CitroK_0123A_6:3280872	Inf1_ListDelta.fasta-vs-0123W.mpileup	265	0	265	C	A
CitroK_0123A_6:3280872	Inf1_ListDelta.fasta-vs-0123Y.mpileup	314	0	315	C	A
CitroK_0123A_6:3280872	Inf1_ListDelta.fasta-vs-0116A.mpileup	660	0	660	C	A
CitroK_0123A_6:3280872	Inf1_ListDelta.fasta-vs-0110A.mpileup	544	1	546	C	A
CitroK_0123A_6:3280872	Inf1_ListDelta.fasta-vs-0113A.mpileup	626	1	627	C	A
CitroK_0123A_6:3280872	Inf1_ListDelta.fasta-vs-0120A.mpileup	546	1	548	C	A
CitroK_0123A_6:3280872	Inf1_ListDelta.fasta-vs-0111A.mpileup	534	1	536	C	A
CitroK_0123A_6:3280872	Inf1_ListDelta.fasta-vs-0114A.mpileup	612	1	613	C	A
CitroK_0123A_6:3280872	Inf1_ListDelta.fasta-vs-0117A.mpileup	344	0	344	C	A
CitroK_0123A_6:3280872	Inf1_ListDelta.fasta-vs-0123A.mpileup	402	0	402	C	A
CitroK_0123A_6:3280872	Inf1_ListDelta.fasta-vs-0126A.mpileup	412	1	414	C	A
CitroK_0123A_6:3280872	Inf1_ListDelta.fasta-vs-0118A.mpileup	360	0	360	C	A
CitroK_0123A_6:3280872	Inf1_ListDelta.fasta-vs-0124A.mpileup	404	0	404	C	A
CitroK_0123A_6:3280872	Inf1_ListDelta.fasta-vs-0106W.mpileup	82	0	82	C	A
CitroK_0123A_6:3280872	Inf1_ListDelta.fasta-vs-0112A.mpileup	760	0	761	C	A
CitroK_0123A_6:3280872	Inf1_ListDelta.fasta-vs-0125A.mpileup	448	0	448	C	A
CitroK_0123A_6:3280872	Inf1_ListDelta.fasta-vs-0127A.mpileup	207	0	207	C	A
CitroK_0123A_6:3280872	Inf1_ListDelta.fasta-vs-0106Y.mpileup	564	0	564	C	A
CitroK_0123A_6:3280872	Inf1_ListDelta.fasta-vs-0115A.mpileup	402	0	402	C	A
CitroK_0123A_6:3280872	Inf1_ListDelta.fasta-vs-0119A.mpileup	498	0	498	C	A
CitroK_0123A_6:3280872	Inf1_ListDelta.fasta-vs-0121A.mpileup	445	0	445	C	A
CitroK_0123A_6:1372667	Inf1_ListDelta.fasta-vs-0123W.mpileup	238	0	239	G	A
CitroK_0123A_6:1372667	Inf1_ListDelta.fasta-vs-0123Y.mpileup	310	0	311	G	A
CitroK_0123A_6:1372667	Inf1_ListDelta.fasta-vs-0116A.mpileup	739	0	741	G	A
CitroK_0123A_6:1372667	Inf1_ListDelta.fasta-vs-0110A.mpileup	621	0	621	G	A
CitroK_0123A_6:1372667	Inf1_ListDelta.fasta-vs-0113A.mpileup	725	0	726	G	A
CitroK_0123A_6:1372667	Inf1_ListDelta.fasta-vs-0120A.mpileup	617	0	617	G	A
CitroK_0123A_6:1372667	Inf1_ListDelta.fasta-vs-0111A.mpileup	677	0	677	G	A
CitroK_0123A_6:1372667	Inf1_ListDelta.fasta-vs-0114A.mpileup	717	0	717	G	A
CitroK_0123A_6:1372667	Inf1_ListDelta.fasta-vs-0117A.mpileup	348	0	349	G	A
CitroK_0123A_6:1372667	Inf1_ListDelta.fasta-vs-0123A.mpileup	524	1	526	G	A
CitroK_0123A_6:1372667	Inf1_ListDelta.fasta-vs-0126A.mpileup	493	0	495	G	A
CitroK_0123A_6:1372667	Inf1_ListDelta.fasta-vs-0118A.mpileup	418	0	418	G	A
CitroK_0123A_6:1372667	Inf1_ListDelta.fasta-vs-0124A.mpileup	482	0	482	G	A
CitroK_0123A_6:1372667	Inf1_ListDelta.fasta-vs-0106W.mpileup	83	0	83	G	A
CitroK_0123A_6:1372667	Inf1_ListDelta.fasta-vs-0112A.mpileup	840	0	840	G	A
CitroK_0123A_6:1372667	Inf1_ListDelta.fasta-vs-0125A.mpileup	570	0	571	G	A
CitroK_0123A_6:1372667	Inf1_ListDelta.fasta-vs-0127A.mpileup	226	1	228	G	A
CitroK_0123A_6:1372667	Inf1_ListDelta.fasta-vs-0106Y.mpileup	642	1	643	G	A
CitroK_0123A_6:1372667	Inf1_ListDelta.fasta-vs-0115A.mpileup	451	0	451	G	A
CitroK_0123A_6:1372667	Inf1_ListDelta.fasta-vs-0119A.mpileup	569	1	570	G	A
CitroK_0123A_6:1372667	Inf1_ListDelta.fasta-vs-0121A.mpileup	490	1	491	G	A
CitroK_0123A_6:2679023	Inf1_ListDelta.fasta-vs-0123W.mpileup	305	0	305	G	A
CitroK_0123A_6:2679023	Inf1_ListDelta.fasta-vs-0123Y.mpileup	321	0	321	G	A
CitroK_0123A_6:2679023	Inf1_ListDelta.fasta-vs-0116A.mpileup	822	0	824	G	A
CitroK_0123A_6:2679023	Inf1_ListDelta.fasta-vs-0110A.mpileup	687	0	688	G	A
CitroK_0123A_6:2679023	Inf1_ListDelta.fasta-vs-0113A.mpileup	770	0	770	G	A
CitroK_0123A_6:2679023	Inf1_ListDelta.fasta-vs-0120A.mpileup	678	0	678	G	A
CitroK_0123A_6:2679023	Inf1_ListDelta.fasta-vs-0111A.mpileup	648	0	650	G	A
CitroK_0123A_6:2679023	Inf1_ListDelta.fasta-vs-0114A.mpileup	750	3	755	G	A
CitroK_0123A_6:2679023	Inf1_ListDelta.fasta-vs-0117A.mpileup	445	0	446	G	A
CitroK_0123A_6:2679023	Inf1_ListDelta.fasta-vs-0123A.mpileup	535	0	535	G	A
CitroK_0123A_6:2679023	Inf1_ListDelta.fasta-vs-0126A.mpileup	473	0	477	G	A
CitroK_0123A_6:2679023	Inf1_ListDelta.fasta-vs-0118A.mpileup	544	2	546	G	A
CitroK_0123A_6:2679023	Inf1_ListDelta.fasta-vs-0124A.mpileup	534	1	535	G	A
CitroK_0123A_6:2679023	Inf1_ListDelta.fasta-vs-0106W.mpileup	85	0	85	G	A
CitroK_0123A_6:2679023	Inf1_ListDelta.fasta-vs-0112A.mpileup	901	0	901	G	A
CitroK_0123A_6:2679023	Inf1_ListDelta.fasta-vs-0125A.mpileup	607	1	610	G	A
CitroK_0123A_6:2679023	Inf1_ListDelta.fasta-vs-0127A.mpileup	240	0	240	G	A
CitroK_0123A_6:2679023	Inf1_ListDelta.fasta-vs-0106Y.mpileup	726	0	727	G	A
CitroK_0123A_6:2679023	Inf1_ListDelta.fasta-vs-0115A.mpileup	509	0	510	G	A
CitroK_0123A_6:2679023	Inf1_ListDelta.fasta-vs-0119A.mpileup	625	0	626	G	A
CitroK_0123A_6:2679023	Inf1_ListDelta.fasta-vs-0121A.mpileup	575	1	576	G	A
CitroK_0123A_6:519234	Inf1_ListDelta.fasta-vs-0123W.mpileup	143	35	178	G	T
CitroK_0123A_6:519234	Inf1_ListDelta.fasta-vs-0123Y.mpileup	174	38	213	G	T
CitroK_0123A_6:519234	Inf1_ListDelta.fasta-vs-0116A.mpileup	453	33	486	G	T
CitroK_0123A_6:519234	Inf1_ListDelta.fasta-vs-0110A.mpileup	360	15	375	G	T
CitroK_0123A_6:519234	Inf1_ListDelta.fasta-vs-0113A.mpileup	414	41	456	G	T
CitroK_0123A_6:519234	Inf1_ListDelta.fasta-vs-0120A.mpileup	366	18	385	G	T
CitroK_0123A_6:519234	Inf1_ListDelta.fasta-vs-0111A.mpileup	334	46	381	G	T
CitroK_0123A_6:519234	Inf1_ListDelta.fasta-vs-0114A.mpileup	473	22	496	G	T
CitroK_0123A_6:519234	Inf1_ListDelta.fasta-vs-0117A.mpileup	227	14	242	G	T
CitroK_0123A_6:519234	Inf1_ListDelta.fasta-vs-0123A.mpileup	311	57	368	G	T
CitroK_0123A_6:519234	Inf1_ListDelta.fasta-vs-0126A.mpileup	309	75	385	G	T
CitroK_0123A_6:519234	Inf1_ListDelta.fasta-vs-0118A.mpileup	290	12	303	G	T
CitroK_0123A_6:519234	Inf1_ListDelta.fasta-vs-0124A.mpileup	291	67	358	G	T
CitroK_0123A_6:519234	Inf1_ListDelta.fasta-vs-0106W.mpileup	26	4	30	G	T
CitroK_0123A_6:519234	Inf1_ListDelta.fasta-vs-0112A.mpileup	535	17	552	G	T
CitroK_0123A_6:519234	Inf1_ListDelta.fasta-vs-0125A.mpileup	340	65	407	G	T
CitroK_0123A_6:519234	Inf1_ListDelta.fasta-vs-0127A.mpileup	128	18	146	G	T
CitroK_0123A_6:519234	Inf1_ListDelta.fasta-vs-0106Y.mpileup	362	66	428	G	T
CitroK_0123A_6:519234	Inf1_ListDelta.fasta-vs-0115A.mpileup	257	35	292	G	T
CitroK_0123A_6:519234	Inf1_ListDelta.fasta-vs-0119A.mpileup	351	30	382	G	T
CitroK_0123A_6:519234	Inf1_ListDelta.fasta-vs-0121A.mpileup	298	34	333	G	T
CitroK_0123A_6:3792323	Inf1_ListDelta.fasta-vs-0123W.mpileup	200	0	200	T	A
CitroK_0123A_6:3792323	Inf1_ListDelta.fasta-vs-0123Y.mpileup	207	0	207	T	A
CitroK_0123A_6:3792323	Inf1_ListDelta.fasta-vs-0116A.mpileup	392	0	393	T	A
CitroK_0123A_6:3792323	Inf1_ListDelta.fasta-vs-0110A.mpileup	364	0	364	T	A
CitroK_0123A_6:3792323	Inf1_ListDelta.fasta-vs-0113A.mpileup	392	0	394	T	A
CitroK_0123A_6:3792323	Inf1_ListDelta.fasta-vs-0120A.mpileup	376	0	376	T	A
CitroK_0123A_6:3792323	Inf1_ListDelta.fasta-vs-0111A.mpileup	347	0	347	T	A
CitroK_0123A_6:3792323	Inf1_ListDelta.fasta-vs-0114A.mpileup	394	0	394	T	A
CitroK_0123A_6:3792323	Inf1_ListDelta.fasta-vs-0117A.mpileup	210	0	210	T	A
CitroK_0123A_6:3792323	Inf1_ListDelta.fasta-vs-0123A.mpileup	402	0	403	T	A
CitroK_0123A_6:3792323	Inf1_ListDelta.fasta-vs-0126A.mpileup	438	0	439	T	A
CitroK_0123A_6:3792323	Inf1_ListDelta.fasta-vs-0118A.mpileup	244	0	244	T	A
CitroK_0123A_6:3792323	Inf1_ListDelta.fasta-vs-0124A.mpileup	369	0	370	T	A
CitroK_0123A_6:3792323	Inf1_ListDelta.fasta-vs-0106W.mpileup	86	0	86	T	A
CitroK_0123A_6:3792323	Inf1_ListDelta.fasta-vs-0112A.mpileup	486	0	486	T	A
CitroK_0123A_6:3792323	Inf1_ListDelta.fasta-vs-0125A.mpileup	451	0	451	T	A
CitroK_0123A_6:3792323	Inf1_ListDelta.fasta-vs-0127A.mpileup	177	0	177	T	A
CitroK_0123A_6:3792323	Inf1_ListDelta.fasta-vs-0106Y.mpileup	469	2	471	T	A
CitroK_0123A_6:3792323	Inf1_ListDelta.fasta-vs-0115A.mpileup	246	0	246	T	A
CitroK_0123A_6:3792323	Inf1_ListDelta.fasta-vs-0119A.mpileup	356	0	356	T	A
CitroK_0123A_6:3792323	Inf1_ListDelta.fasta-vs-0121A.mpileup	302	0	302	T	A
CitroK_0123A_6:3452040	Inf1_ListDelta.fasta-vs-0123W.mpileup	0	0	1	T	G
CitroK_0123A_6:3452040	Inf1_ListDelta.fasta-vs-0123Y.mpileup	3	0	4	T	G
CitroK_0123A_6:3452040	Inf1_ListDelta.fasta-vs-0116A.mpileup	11	5	27	T	G
CitroK_0123A_6:3452040	Inf1_ListDelta.fasta-vs-0110A.mpileup	10	3	17	T	G
CitroK_0123A_6:3452040	Inf1_ListDelta.fasta-vs-0113A.mpileup	9	7	23	T	G
CitroK_0123A_6:3452040	Inf1_ListDelta.fasta-vs-0120A.mpileup	12	3	18	T	G
CitroK_0123A_6:3452040	Inf1_ListDelta.fasta-vs-0111A.mpileup	2	0	2	T	G
CitroK_0123A_6:3452040	Inf1_ListDelta.fasta-vs-0114A.mpileup	8	1	14	T	G
CitroK_0123A_6:3452040	Inf1_ListDelta.fasta-vs-0117A.mpileup	7	1	11	T	G
CitroK_0123A_6:3452040	Inf1_ListDelta.fasta-vs-0123A.mpileup	4	0	4	T	G
CitroK_0123A_6:3452040	Inf1_ListDelta.fasta-vs-0126A.mpileup	6	3	13	T	G
CitroK_0123A_6:3452040	Inf1_ListDelta.fasta-vs-0118A.mpileup	7	0	10	T	G
CitroK_0123A_6:3452040	Inf1_ListDelta.fasta-vs-0124A.mpileup	8	1	11	T	G
CitroK_0123A_6:3452040	Inf1_ListDelta.fasta-vs-0106W.mpileup	2	0	3	T	G
CitroK_0123A_6:3452040	Inf1_ListDelta.fasta-vs-0112A.mpileup	6	2	10	T	G
CitroK_0123A_6:3452040	Inf1_ListDelta.fasta-vs-0125A.mpileup	11	1	18	T	G
CitroK_0123A_6:3452040	Inf1_ListDelta.fasta-vs-0127A.mpileup	7	2	15	T	G
CitroK_0123A_6:3452040	Inf1_ListDelta.fasta-vs-0106Y.mpileup	6	3	13	T	G
CitroK_0123A_6:3452040	Inf1_ListDelta.fasta-vs-0115A.mpileup	7	0	10	T	G
CitroK_0123A_6:3452040	Inf1_ListDelta.fasta-vs-0119A.mpileup	1	2	5	T	G
CitroK_0123A_6:3452040	Inf1_ListDelta.fasta-vs-0121A.mpileup	7	4	13	T	G
CitroK_0123A_6:1373159	Inf1_ListDelta.fasta-vs-0123W.mpileup	253	0	253	C	T
CitroK_0123A_6:1373159	Inf1_ListDelta.fasta-vs-0123Y.mpileup	310	0	310	C	T
CitroK_0123A_6:1373159	Inf1_ListDelta.fasta-vs-0116A.mpileup	729	0	729	C	T
CitroK_0123A_6:1373159	Inf1_ListDelta.fasta-vs-0110A.mpileup	655	0	656	C	T
CitroK_0123A_6:1373159	Inf1_ListDelta.fasta-vs-0113A.mpileup	714	1	715	C	T
CitroK_0123A_6:1373159	Inf1_ListDelta.fasta-vs-0120A.mpileup	610	2	612	C	T
CitroK_0123A_6:1373159	Inf1_ListDelta.fasta-vs-0111A.mpileup	574	1	579	C	T
CitroK_0123A_6:1373159	Inf1_ListDelta.fasta-vs-0114A.mpileup	749	0	749	C	T
CitroK_0123A_6:1373159	Inf1_ListDelta.fasta-vs-0117A.mpileup	369	0	369	C	T
CitroK_0123A_6:1373159	Inf1_ListDelta.fasta-vs-0123A.mpileup	465	0	466	C	T
CitroK_0123A_6:1373159	Inf1_ListDelta.fasta-vs-0126A.mpileup	499	0	499	C	T
CitroK_0123A_6:1373159	Inf1_ListDelta.fasta-vs-0118A.mpileup	428	2	431	C	T
CitroK_0123A_6:1373159	Inf1_ListDelta.fasta-vs-0124A.mpileup	493	0	493	C	T
CitroK_0123A_6:1373159	Inf1_ListDelta.fasta-vs-0106W.mpileup	54	0	54	C	T
CitroK_0123A_6:1373159	Inf1_ListDelta.fasta-vs-0112A.mpileup	818	0	818	C	T
CitroK_0123A_6:1373159	Inf1_ListDelta.fasta-vs-0125A.mpileup	507	0	508	C	T
CitroK_0123A_6:1373159	Inf1_ListDelta.fasta-vs-0127A.mpileup	245	1	247	C	T
CitroK_0123A_6:1373159	Inf1_ListDelta.fasta-vs-0106Y.mpileup	616	0	616	C	T
CitroK_0123A_6:1373159	Inf1_ListDelta.fasta-vs-0115A.mpileup	449	0	449	C	T
CitroK_0123A_6:1373159	Inf1_ListDelta.fasta-vs-0119A.mpileup	537	0	537	C	T
CitroK_0123A_6:1373159	Inf1_ListDelta.fasta-vs-0121A.mpileup	503	1	504	C	T
CitroK_0123A_6:2101496	Inf1_ListDelta.fasta-vs-0123W.mpileup	324	0	324	A	C
CitroK_0123A_6:2101496	Inf1_ListDelta.fasta-vs-0123Y.mpileup	395	1	396	A	C
CitroK_0123A_6:2101496	Inf1_ListDelta.fasta-vs-0116A.mpileup	808	2	811	A	C
CitroK_0123A_6:2101496	Inf1_ListDelta.fasta-vs-0110A.mpileup	729	2	731	A	C
CitroK_0123A_6:2101496	Inf1_ListDelta.fasta-vs-0113A.mpileup	828	2	832	A	C
CitroK_0123A_6:2101496	Inf1_ListDelta.fasta-vs-0120A.mpileup	695	0	695	A	C
CitroK_0123A_6:2101496	Inf1_ListDelta.fasta-vs-0111A.mpileup	693	1	696	A	C
CitroK_0123A_6:2101496	Inf1_ListDelta.fasta-vs-0114A.mpileup	768	0	769	A	C
CitroK_0123A_6:2101496	Inf1_ListDelta.fasta-vs-0117A.mpileup	474	1	475	A	C
CitroK_0123A_6:2101496	Inf1_ListDelta.fasta-vs-0123A.mpileup	525	0	525	A	C
CitroK_0123A_6:2101496	Inf1_ListDelta.fasta-vs-0126A.mpileup	628	0	632	A	C
CitroK_0123A_6:2101496	Inf1_ListDelta.fasta-vs-0118A.mpileup	478	1	480	A	C
CitroK_0123A_6:2101496	Inf1_ListDelta.fasta-vs-0124A.mpileup	583	2	586	A	C
CitroK_0123A_6:2101496	Inf1_ListDelta.fasta-vs-0106W.mpileup	86	0	86	A	C
CitroK_0123A_6:2101496	Inf1_ListDelta.fasta-vs-0112A.mpileup	908	1	910	A	C
CitroK_0123A_6:2101496	Inf1_ListDelta.fasta-vs-0125A.mpileup	657	1	663	A	C
CitroK_0123A_6:2101496	Inf1_ListDelta.fasta-vs-0127A.mpileup	285	1	288	A	C
CitroK_0123A_6:2101496	Inf1_ListDelta.fasta-vs-0106Y.mpileup	868	0	868	A	C
CitroK_0123A_6:2101496	Inf1_ListDelta.fasta-vs-0115A.mpileup	592	3	596	A	C
CitroK_0123A_6:2101496	Inf1_ListDelta.fasta-vs-0119A.mpileup	672	0	674	A	C
CitroK_0123A_6:2101496	Inf1_ListDelta.fasta-vs-0121A.mpileup	599	2	603	A	C
CitroK_0123A_6:305023	Inf1_ListDelta.fasta-vs-0123W.mpileup	199	199	199	A	A
CitroK_0123A_6:305023	Inf1_ListDelta.fasta-vs-0123Y.mpileup	247	247	248	A	A
CitroK_0123A_6:305023	Inf1_ListDelta.fasta-vs-0116A.mpileup	663	663	663	A	A
CitroK_0123A_6:305023	Inf1_ListDelta.fasta-vs-0110A.mpileup	508	508	508	A	A
CitroK_0123A_6:305023	Inf1_ListDelta.fasta-vs-0113A.mpileup	686	686	686	A	A
CitroK_0123A_6:305023	Inf1_ListDelta.fasta-vs-0120A.mpileup	501	501	501	A	A
CitroK_0123A_6:305023	Inf1_ListDelta.fasta-vs-0111A.mpileup	496	496	496	A	A
CitroK_0123A_6:305023	Inf1_ListDelta.fasta-vs-0114A.mpileup	590	590	590	A	A
CitroK_0123A_6:305023	Inf1_ListDelta.fasta-vs-0117A.mpileup	322	322	322	A	A
CitroK_0123A_6:305023	Inf1_ListDelta.fasta-vs-0123A.mpileup	362	362	363	A	A
CitroK_0123A_6:305023	Inf1_ListDelta.fasta-vs-0126A.mpileup	375	375	375	A	A
CitroK_0123A_6:305023	Inf1_ListDelta.fasta-vs-0118A.mpileup	371	371	371	A	A
CitroK_0123A_6:305023	Inf1_ListDelta.fasta-vs-0124A.mpileup	426	426	427	A	A
CitroK_0123A_6:305023	Inf1_ListDelta.fasta-vs-0106W.mpileup	57	57	57	A	A
CitroK_0123A_6:305023	Inf1_ListDelta.fasta-vs-0112A.mpileup	663	663	663	A	A
CitroK_0123A_6:305023	Inf1_ListDelta.fasta-vs-0125A.mpileup	399	399	401	A	A
CitroK_0123A_6:305023	Inf1_ListDelta.fasta-vs-0127A.mpileup	198	198	198	A	A
CitroK_0123A_6:305023	Inf1_ListDelta.fasta-vs-0106Y.mpileup	453	453	454	A	A
CitroK_0123A_6:305023	Inf1_ListDelta.fasta-vs-0115A.mpileup	400	400	400	A	A
CitroK_0123A_6:305023	Inf1_ListDelta.fasta-vs-0119A.mpileup	449	449	450	A	A
CitroK_0123A_6:305023	Inf1_ListDelta.fasta-vs-0121A.mpileup	426	426	426	A	A
CitroK_0123A_6:2694702	Inf1_ListDelta.fasta-vs-0123W.mpileup	334	0	334	C	A
CitroK_0123A_6:2694702	Inf1_ListDelta.fasta-vs-0123Y.mpileup	359	1	360	C	A
CitroK_0123A_6:2694702	Inf1_ListDelta.fasta-vs-0116A.mpileup	880	1	881	C	A
CitroK_0123A_6:2694702	Inf1_ListDelta.fasta-vs-0110A.mpileup	710	1	712	C	A
CitroK_0123A_6:2694702	Inf1_ListDelta.fasta-vs-0113A.mpileup	818	0	818	C	A
CitroK_0123A_6:2694702	Inf1_ListDelta.fasta-vs-0120A.mpileup	703	0	704	C	A
CitroK_0123A_6:2694702	Inf1_ListDelta.fasta-vs-0111A.mpileup	658	0	659	C	A
CitroK_0123A_6:2694702	Inf1_ListDelta.fasta-vs-0114A.mpileup	779	2	782	C	A
CitroK_0123A_6:2694702	Inf1_ListDelta.fasta-vs-0117A.mpileup	450	0	450	C	A
CitroK_0123A_6:2694702	Inf1_ListDelta.fasta-vs-0123A.mpileup	532	0	534	C	A
CitroK_0123A_6:2694702	Inf1_ListDelta.fasta-vs-0126A.mpileup	571	2	590	C	A
CitroK_0123A_6:2694702	Inf1_ListDelta.fasta-vs-0118A.mpileup	450	0	453	C	A
CitroK_0123A_6:2694702	Inf1_ListDelta.fasta-vs-0124A.mpileup	591	1	594	C	A
CitroK_0123A_6:2694702	Inf1_ListDelta.fasta-vs-0106W.mpileup	70	0	70	C	A
CitroK_0123A_6:2694702	Inf1_ListDelta.fasta-vs-0112A.mpileup	921	0	921	C	A
CitroK_0123A_6:2694702	Inf1_ListDelta.fasta-vs-0125A.mpileup	634	0	682	C	A
CitroK_0123A_6:2694702	Inf1_ListDelta.fasta-vs-0127A.mpileup	254	1	356	C	A
CitroK_0123A_6:2694702	Inf1_ListDelta.fasta-vs-0106Y.mpileup	726	1	727	C	A
CitroK_0123A_6:2694702	Inf1_ListDelta.fasta-vs-0115A.mpileup	538	0	538	C	A
CitroK_0123A_6:2694702	Inf1_ListDelta.fasta-vs-0119A.mpileup	564	0	566	C	A
CitroK_0123A_6:2694702	Inf1_ListDelta.fasta-vs-0121A.mpileup	539	1	541	C	A
CitroK_0123A_6:171780	Inf1_ListDelta.fasta-vs-0123W.mpileup	175	0	175	C	T
CitroK_0123A_6:171780	Inf1_ListDelta.fasta-vs-0123Y.mpileup	228	0	228	C	T
CitroK_0123A_6:171780	Inf1_ListDelta.fasta-vs-0116A.mpileup	593	0	595	C	T
CitroK_0123A_6:171780	Inf1_ListDelta.fasta-vs-0110A.mpileup	494	1	496	C	T
CitroK_0123A_6:171780	Inf1_ListDelta.fasta-vs-0113A.mpileup	654	0	654	C	T
CitroK_0123A_6:171780	Inf1_ListDelta.fasta-vs-0120A.mpileup	480	1	482	C	T
CitroK_0123A_6:171780	Inf1_ListDelta.fasta-vs-0111A.mpileup	484	0	484	C	T
CitroK_0123A_6:171780	Inf1_ListDelta.fasta-vs-0114A.mpileup	577	0	578	C	T
CitroK_0123A_6:171780	Inf1_ListDelta.fasta-vs-0117A.mpileup	300	0	300	C	T
CitroK_0123A_6:171780	Inf1_ListDelta.fasta-vs-0123A.mpileup	344	0	344	C	T
CitroK_0123A_6:171780	Inf1_ListDelta.fasta-vs-0126A.mpileup	375	0	375	C	T
CitroK_0123A_6:171780	Inf1_ListDelta.fasta-vs-0118A.mpileup	350	1	351	C	T
CitroK_0123A_6:171780	Inf1_ListDelta.fasta-vs-0124A.mpileup	419	0	419	C	T
CitroK_0123A_6:171780	Inf1_ListDelta.fasta-vs-0106W.mpileup	50	0	50	C	T
CitroK_0123A_6:171780	Inf1_ListDelta.fasta-vs-0112A.mpileup	688	0	690	C	T
CitroK_0123A_6:171780	Inf1_ListDelta.fasta-vs-0125A.mpileup	377	0	377	C	T
CitroK_0123A_6:171780	Inf1_ListDelta.fasta-vs-0127A.mpileup	199	0	200	C	T
CitroK_0123A_6:171780	Inf1_ListDelta.fasta-vs-0106Y.mpileup	425	0	425	C	T
CitroK_0123A_6:171780	Inf1_ListDelta.fasta-vs-0115A.mpileup	418	1	419	C	T
CitroK_0123A_6:171780	Inf1_ListDelta.fasta-vs-0119A.mpileup	495	0	495	C	T
CitroK_0123A_6:171780	Inf1_ListDelta.fasta-vs-0121A.mpileup	437	2	439	C	T
CitroK_0123A_6:2119283	Inf1_ListDelta.fasta-vs-0123W.mpileup	3	3	3	A	A
CitroK_0123A_6:2119283	Inf1_ListDelta.fasta-vs-0125A.mpileup	4	4	47	A	A
CitroK_0123A_6:2119283	Inf1_ListDelta.fasta-vs-0111A.mpileup	1	1	1	A	A
CitroK_0123A_6:2119283	Inf1_ListDelta.fasta-vs-0114A.mpileup	1	1	1	A	A
CitroK_0123A_6:2119283	Inf1_ListDelta.fasta-vs-0115A.mpileup	1	1	1	A	A
CitroK_0123A_6:2119283	Inf1_ListDelta.fasta-vs-0126A.mpileup	4	4	18	A	A
CitroK_0123A_6:2119283	Inf1_ListDelta.fasta-vs-0124A.mpileup	1	1	1	A	A
CitroK_0123A_6:2119283	Inf1_ListDelta.fasta-vs-0112A.mpileup	1	1	1	A	A
CitroK_0123A_6:2119283	Inf1_ListDelta.fasta-vs-0110A.mpileup	1	1	1	A	A
CitroK_0123A_6:2119283	Inf1_ListDelta.fasta-vs-0127A.mpileup	7	7	104	A	A
CitroK_0123A_6:2119283	Inf1_ListDelta.fasta-vs-0123A.mpileup	1	1	1	A	A
CitroK_0123A_6:2119283	Inf1_ListDelta.fasta-vs-0121A.mpileup	1	1	1	A	A
CitroK_0123A_6:479808	Inf1_ListDelta.fasta-vs-0123W.mpileup	213	0	214	A	C
CitroK_0123A_6:479808	Inf1_ListDelta.fasta-vs-0123Y.mpileup	275	0	275	A	C
CitroK_0123A_6:479808	Inf1_ListDelta.fasta-vs-0116A.mpileup	601	0	601	A	C
CitroK_0123A_6:479808	Inf1_ListDelta.fasta-vs-0110A.mpileup	540	0	540	A	C
CitroK_0123A_6:479808	Inf1_ListDelta.fasta-vs-0113A.mpileup	645	1	646	A	C
CitroK_0123A_6:479808	Inf1_ListDelta.fasta-vs-0120A.mpileup	529	0	529	A	C
CitroK_0123A_6:479808	Inf1_ListDelta.fasta-vs-0111A.mpileup	485	0	485	A	C
CitroK_0123A_6:479808	Inf1_ListDelta.fasta-vs-0114A.mpileup	558	1	560	A	C
CitroK_0123A_6:479808	Inf1_ListDelta.fasta-vs-0117A.mpileup	363	1	364	A	C
CitroK_0123A_6:479808	Inf1_ListDelta.fasta-vs-0123A.mpileup	414	0	414	A	C
CitroK_0123A_6:479808	Inf1_ListDelta.fasta-vs-0126A.mpileup	479	1	482	A	C
CitroK_0123A_6:479808	Inf1_ListDelta.fasta-vs-0118A.mpileup	351	0	351	A	C
CitroK_0123A_6:479808	Inf1_ListDelta.fasta-vs-0124A.mpileup	446	1	449	A	C
CitroK_0123A_6:479808	Inf1_ListDelta.fasta-vs-0106W.mpileup	69	0	70	A	C
CitroK_0123A_6:479808	Inf1_ListDelta.fasta-vs-0112A.mpileup	719	1	720	A	C
CitroK_0123A_6:479808	Inf1_ListDelta.fasta-vs-0125A.mpileup	519	0	520	A	C
CitroK_0123A_6:479808	Inf1_ListDelta.fasta-vs-0127A.mpileup	196	0	197	A	C
CitroK_0123A_6:479808	Inf1_ListDelta.fasta-vs-0106Y.mpileup	495	0	495	A	C
CitroK_0123A_6:479808	Inf1_ListDelta.fasta-vs-0115A.mpileup	376	0	376	A	C
CitroK_0123A_6:479808	Inf1_ListDelta.fasta-vs-0119A.mpileup	435	0	436	A	C
CitroK_0123A_6:479808	Inf1_ListDelta.fasta-vs-0121A.mpileup	440	1	441	A	C
CitroK_0123A_6:743507	Inf1_ListDelta.fasta-vs-0123W.mpileup	209	209	209	A	A
CitroK_0123A_6:743507	Inf1_ListDelta.fasta-vs-0123Y.mpileup	299	299	301	A	A
CitroK_0123A_6:743507	Inf1_ListDelta.fasta-vs-0116A.mpileup	659	659	659	A	A
CitroK_0123A_6:743507	Inf1_ListDelta.fasta-vs-0110A.mpileup	603	603	604	A	A
CitroK_0123A_6:743507	Inf1_ListDelta.fasta-vs-0113A.mpileup	702	702	702	A	A
CitroK_0123A_6:743507	Inf1_ListDelta.fasta-vs-0120A.mpileup	588	588	588	A	A
CitroK_0123A_6:743507	Inf1_ListDelta.fasta-vs-0111A.mpileup	557	557	559	A	A
CitroK_0123A_6:743507	Inf1_ListDelta.fasta-vs-0114A.mpileup	626	626	628	A	A
CitroK_0123A_6:743507	Inf1_ListDelta.fasta-vs-0117A.mpileup	346	346	346	A	A
CitroK_0123A_6:743507	Inf1_ListDelta.fasta-vs-0123A.mpileup	416	416	416	A	A
CitroK_0123A_6:743507	Inf1_ListDelta.fasta-vs-0126A.mpileup	451	451	453	A	A
CitroK_0123A_6:743507	Inf1_ListDelta.fasta-vs-0118A.mpileup	409	409	411	A	A
CitroK_0123A_6:743507	Inf1_ListDelta.fasta-vs-0124A.mpileup	470	470	471	A	A
CitroK_0123A_6:743507	Inf1_ListDelta.fasta-vs-0106W.mpileup	50	50	50	A	A
CitroK_0123A_6:743507	Inf1_ListDelta.fasta-vs-0112A.mpileup	720	720	721	A	A
CitroK_0123A_6:743507	Inf1_ListDelta.fasta-vs-0125A.mpileup	506	506	509	A	A
CitroK_0123A_6:743507	Inf1_ListDelta.fasta-vs-0127A.mpileup	204	204	210	A	A
CitroK_0123A_6:743507	Inf1_ListDelta.fasta-vs-0106Y.mpileup	597	597	597	A	A
CitroK_0123A_6:743507	Inf1_ListDelta.fasta-vs-0115A.mpileup	445	445	445	A	A
CitroK_0123A_6:743507	Inf1_ListDelta.fasta-vs-0119A.mpileup	499	499	499	A	A
CitroK_0123A_6:743507	Inf1_ListDelta.fasta-vs-0121A.mpileup	501	501	501	A	A
CitroK_0123A_6:2711906	Inf1_ListDelta.fasta-vs-0123W.mpileup	146	0	146	G	A
CitroK_0123A_6:2711906	Inf1_ListDelta.fasta-vs-0123Y.mpileup	212	0	213	G	A
CitroK_0123A_6:2711906	Inf1_ListDelta.fasta-vs-0116A.mpileup	290	1	291	G	A
CitroK_0123A_6:2711906	Inf1_ListDelta.fasta-vs-0110A.mpileup	283	0	284	G	A
CitroK_0123A_6:2711906	Inf1_ListDelta.fasta-vs-0113A.mpileup	421	0	421	G	A
CitroK_0123A_6:2711906	Inf1_ListDelta.fasta-vs-0120A.mpileup	269	0	269	G	A
CitroK_0123A_6:2711906	Inf1_ListDelta.fasta-vs-0111A.mpileup	357	0	358	G	A
CitroK_0123A_6:2711906	Inf1_ListDelta.fasta-vs-0114A.mpileup	281	0	282	G	A
CitroK_0123A_6:2711906	Inf1_ListDelta.fasta-vs-0117A.mpileup	203	0	204	G	A
CitroK_0123A_6:2711906	Inf1_ListDelta.fasta-vs-0123A.mpileup	171	0	171	G	A
CitroK_0123A_6:2711906	Inf1_ListDelta.fasta-vs-0126A.mpileup	340	1	342	G	A
CitroK_0123A_6:2711906	Inf1_ListDelta.fasta-vs-0118A.mpileup	167	0	167	G	A
CitroK_0123A_6:2711906	Inf1_ListDelta.fasta-vs-0124A.mpileup	250	0	250	G	A
CitroK_0123A_6:2711906	Inf1_ListDelta.fasta-vs-0106W.mpileup	52	0	52	G	A
CitroK_0123A_6:2711906	Inf1_ListDelta.fasta-vs-0112A.mpileup	335	1	336	G	A
CitroK_0123A_6:2711906	Inf1_ListDelta.fasta-vs-0125A.mpileup	344	1	345	G	A
CitroK_0123A_6:2711906	Inf1_ListDelta.fasta-vs-0127A.mpileup	334	0	334	G	A
CitroK_0123A_6:2711906	Inf1_ListDelta.fasta-vs-0106Y.mpileup	401	0	401	G	A
CitroK_0123A_6:2711906	Inf1_ListDelta.fasta-vs-0115A.mpileup	284	0	284	G	A
CitroK_0123A_6:2711906	Inf1_ListDelta.fasta-vs-0119A.mpileup	314	0	314	G	A
CitroK_0123A_6:2711906	Inf1_ListDelta.fasta-vs-0121A.mpileup	267	1	268	G	A
CitroK_0123A_6:3449035	Inf1_ListDelta.fasta-vs-0123W.mpileup	176	176	176	A	A
CitroK_0123A_6:3449035	Inf1_ListDelta.fasta-vs-0123Y.mpileup	249	249	249	A	A
CitroK_0123A_6:3449035	Inf1_ListDelta.fasta-vs-0116A.mpileup	329	329	329	A	A
CitroK_0123A_6:3449035	Inf1_ListDelta.fasta-vs-0110A.mpileup	336	336	336	A	A
CitroK_0123A_6:3449035	Inf1_ListDelta.fasta-vs-0113A.mpileup	536	536	537	A	A
CitroK_0123A_6:3449035	Inf1_ListDelta.fasta-vs-0120A.mpileup	252	252	252	A	A
CitroK_0123A_6:3449035	Inf1_ListDelta.fasta-vs-0111A.mpileup	457	457	457	A	A
CitroK_0123A_6:3449035	Inf1_ListDelta.fasta-vs-0114A.mpileup	291	291	291	A	A
CitroK_0123A_6:3449035	Inf1_ListDelta.fasta-vs-0117A.mpileup	266	266	266	A	A
CitroK_0123A_6:3449035	Inf1_ListDelta.fasta-vs-0123A.mpileup	134	134	134	A	A
CitroK_0123A_6:3449035	Inf1_ListDelta.fasta-vs-0126A.mpileup	426	426	427	A	A
CitroK_0123A_6:3449035	Inf1_ListDelta.fasta-vs-0118A.mpileup	191	191	191	A	A
CitroK_0123A_6:3449035	Inf1_ListDelta.fasta-vs-0124A.mpileup	373	373	373	A	A
CitroK_0123A_6:3449035	Inf1_ListDelta.fasta-vs-0106W.mpileup	61	61	61	A	A
CitroK_0123A_6:3449035	Inf1_ListDelta.fasta-vs-0112A.mpileup	357	357	357	A	A
CitroK_0123A_6:3449035	Inf1_ListDelta.fasta-vs-0125A.mpileup	251	251	251	A	A
CitroK_0123A_6:3449035	Inf1_ListDelta.fasta-vs-0127A.mpileup	263	263	264	A	A
CitroK_0123A_6:3449035	Inf1_ListDelta.fasta-vs-0106Y.mpileup	572	572	572	A	A
CitroK_0123A_6:3449035	Inf1_ListDelta.fasta-vs-0115A.mpileup	347	347	347	A	A
CitroK_0123A_6:3449035	Inf1_ListDelta.fasta-vs-0119A.mpileup	381	381	381	A	A
CitroK_0123A_6:3449035	Inf1_ListDelta.fasta-vs-0121A.mpileup	385	385	385	A	A
CitroK_0123A_6:3087375	Inf1_ListDelta.fasta-vs-0123W.mpileup	277	277	278	A	A
CitroK_0123A_6:3087375	Inf1_ListDelta.fasta-vs-0123Y.mpileup	324	324	324	A	A
CitroK_0123A_6:3087375	Inf1_ListDelta.fasta-vs-0116A.mpileup	718	718	720	A	A
CitroK_0123A_6:3087375	Inf1_ListDelta.fasta-vs-0110A.mpileup	596	596	598	A	A
CitroK_0123A_6:3087375	Inf1_ListDelta.fasta-vs-0113A.mpileup	743	743	743	A	A
CitroK_0123A_6:3087375	Inf1_ListDelta.fasta-vs-0120A.mpileup	624	624	625	A	A
CitroK_0123A_6:3087375	Inf1_ListDelta.fasta-vs-0111A.mpileup	573	573	573	A	A
CitroK_0123A_6:3087375	Inf1_ListDelta.fasta-vs-0114A.mpileup	675	675	676	A	A
CitroK_0123A_6:3087375	Inf1_ListDelta.fasta-vs-0117A.mpileup	380	380	381	A	A
CitroK_0123A_6:3087375	Inf1_ListDelta.fasta-vs-0123A.mpileup	508	508	509	A	A
CitroK_0123A_6:3087375	Inf1_ListDelta.fasta-vs-0126A.mpileup	500	500	500	A	A
CitroK_0123A_6:3087375	Inf1_ListDelta.fasta-vs-0118A.mpileup	399	399	399	A	A
CitroK_0123A_6:3087375	Inf1_ListDelta.fasta-vs-0124A.mpileup	499	499	499	A	A
CitroK_0123A_6:3087375	Inf1_ListDelta.fasta-vs-0106W.mpileup	60	60	60	A	A
CitroK_0123A_6:3087375	Inf1_ListDelta.fasta-vs-0112A.mpileup	805	805	806	A	A
CitroK_0123A_6:3087375	Inf1_ListDelta.fasta-vs-0125A.mpileup	514	514	514	A	A
CitroK_0123A_6:3087375	Inf1_ListDelta.fasta-vs-0127A.mpileup	225	225	225	A	A
CitroK_0123A_6:3087375	Inf1_ListDelta.fasta-vs-0106Y.mpileup	660	660	660	A	A
CitroK_0123A_6:3087375	Inf1_ListDelta.fasta-vs-0115A.mpileup	501	501	501	A	A
CitroK_0123A_6:3087375	Inf1_ListDelta.fasta-vs-0119A.mpileup	557	557	557	A	A
CitroK_0123A_6:3087375	Inf1_ListDelta.fasta-vs-0121A.mpileup	499	499	499	A	A
CitroK_0123A_6:1489953	Inf1_ListDelta.fasta-vs-0123W.mpileup	299	0	299	G	T
CitroK_0123A_6:1489953	Inf1_ListDelta.fasta-vs-0123Y.mpileup	363	0	363	G	T
CitroK_0123A_6:1489953	Inf1_ListDelta.fasta-vs-0116A.mpileup	775	0	775	G	T
CitroK_0123A_6:1489953	Inf1_ListDelta.fasta-vs-0110A.mpileup	595	1	596	G	T
CitroK_0123A_6:1489953	Inf1_ListDelta.fasta-vs-0113A.mpileup	789	0	790	G	T
CitroK_0123A_6:1489953	Inf1_ListDelta.fasta-vs-0120A.mpileup	642	0	642	G	T
CitroK_0123A_6:1489953	Inf1_ListDelta.fasta-vs-0111A.mpileup	647	1	649	G	T
CitroK_0123A_6:1489953	Inf1_ListDelta.fasta-vs-0114A.mpileup	724	1	725	G	T
CitroK_0123A_6:1489953	Inf1_ListDelta.fasta-vs-0117A.mpileup	439	0	439	G	T
CitroK_0123A_6:1489953	Inf1_ListDelta.fasta-vs-0123A.mpileup	492	0	495	G	T
CitroK_0123A_6:1489953	Inf1_ListDelta.fasta-vs-0126A.mpileup	541	1	544	G	T
CitroK_0123A_6:1489953	Inf1_ListDelta.fasta-vs-0118A.mpileup	453	0	456	G	T
CitroK_0123A_6:1489953	Inf1_ListDelta.fasta-vs-0124A.mpileup	519	0	519	G	T
[truncated: 129,038 more rows]

## Sheet: Masked_regions
scaffold	start	end
CitroK_0123A_6	117034	117211
CitroK_0123A_6	117115	117292
CitroK_0123A_6	366936	367124
CitroK_0123A_6	415012	415200
CitroK_0123A_6	513965	514153
CitroK_0123A_6	560849	575508
CitroK_0123A_6	734308	734484
CitroK_0123A_6	734516	734692
CitroK_0123A_6	734637	734813
CitroK_0123A_6	823060	823237
CitroK_0123A_6	823145	823330
CitroK_0123A_6	823253	823428
CitroK_0123A_6	823364	823539
CitroK_0123A_6	823455	823632
CitroK_0123A_6	823538	823713
CitroK_0123A_6	823656	823831
CitroK_0123A_6	938702	938879
CitroK_0123A_6	1249579	1249755
CitroK_0123A_6	1264867	1265044
CitroK_0123A_6	1272595	1272806
CitroK_0123A_6	1272804	1275806
CitroK_0123A_6	1275934	1276110
CitroK_0123A_6	1276096	1277735
CitroK_0123A_6	1538792	1538979
CitroK_0123A_6	1538906	1539093
CitroK_0123A_6	1539025	1539212
CitroK_0123A_6	1616858	1617043
CitroK_0123A_6	1734693	1734869
CitroK_0123A_6	1734844	1735020
CitroK_0123A_6	1734988	1735164
CitroK_0123A_6	1763911	1764087
CitroK_0123A_6	1949977	1950188
CitroK_0123A_6	1950281	1953283
CitroK_0123A_6	1953536	1955175
CitroK_0123A_6	1984045	1984221
CitroK_0123A_6	1984126	1984301
CitroK_0123A_6	1984318	1984503
CitroK_0123A_6	1984411	1984587
CitroK_0123A_6	1988019	1988230
CitroK_0123A_6	1988228	1991231
CitroK_0123A_6	1991645	1993284
CitroK_0123A_6	2117735	2117946
CitroK_0123A_6	2118055	2121058
CitroK_0123A_6	2121135	2121311
CitroK_0123A_6	2121324	2121501
CitroK_0123A_6	2121472	2123111
CitroK_0123A_6	2170345	2170522
CitroK_0123A_6	2170465	2170652
CitroK_0123A_6	2170571	2170747
CitroK_0123A_6	2170701	2170878
CitroK_0123A_6	2207754	2207930
CitroK_0123A_6	2207838	2208015
CitroK_0123A_6	2207971	2208182
CitroK_0123A_6	2208180	2211182
CitroK_0123A_6	2211271	2211447
CitroK_0123A_6	2211433	2213072
CitroK_0123A_6	2338947	2339142
CitroK_0123A_6	2446383	2446560
CitroK_0123A_6	2709503	2711141
CitroK_0123A_6	2711127	2711303
CitroK_0123A_6	2711392	2714394
CitroK_0123A_6	2714393	2714604
CitroK_0123A_6	2714521	2714697
CitroK_0123A_6	2714639	2714850
CitroK_0123A_6	2811029	2811216
CitroK_0123A_6	2813009	2813186
CitroK_0123A_6	2899090	2899266
CitroK_0123A_6	3043697	3043873
CitroK_0123A_6	3126594	3126768
CitroK_0123A_6	3197529	3197706
CitroK_0123A_6	3197757	3197934
CitroK_0123A_6	3197880	3198057
CitroK_0123A_6	3310081	3310274
CitroK_0123A_6	3310177	3310354
CitroK_0123A_6	3310316	3310493
CitroK_0123A_6	3310586	3310763
CitroK_0123A_6	3310856	3311033
CitroK_0123A_6	3397647	3412565
CitroK_0123A_6	3447093	3448732
CitroK_0123A_6	3448718	3448894
CitroK_0123A_6	3449022	3452026
CitroK_0123A_6	3452024	3452235
CitroK_0123A_6	3637712	3637888
CitroK_0123A_6	3637792	3637968
CitroK_0123A_6	3637914	3638090
CitroK_0123A_6	3638034	3638210
CitroK_0123A_6	3640836	3641012
CitroK_0123A_6	3640951	3641127
CitroK_0123A_6	3690318	3690493
CitroK_0123A_6	3831077	3831254
CitroK_0123A_6	4063726	4063902
CitroK_0123A_6	4065549	4065725
CitroK_0123A_6	4225172	4225348
CitroK_0123A_6	4226239	4226429
CitroK_0123A_6	4292164	4292340
CitroK_0123A_6	4292292	4292466
CitroK_0123A_6	4292378	4292565
CitroK_0123A_6	4544995	4545180
CitroK_0123A_6	4603727	4603911
CitroK_0123A_6	4603812	4603988
