# Supplementary material for: Identical bacterial populations colonize premature infant gut, skin, and oral microbiomes and exhibit different in situ growth rates
Source: HighWire-hosted journal article supplement (doi:10.1101/gr.213256.116), 2017-01-10
Supplement: Supplemental_Fig_S4.pdf [file Supplemental_Fig_S4.pdf]

**A**

### Phage / plasmid genome

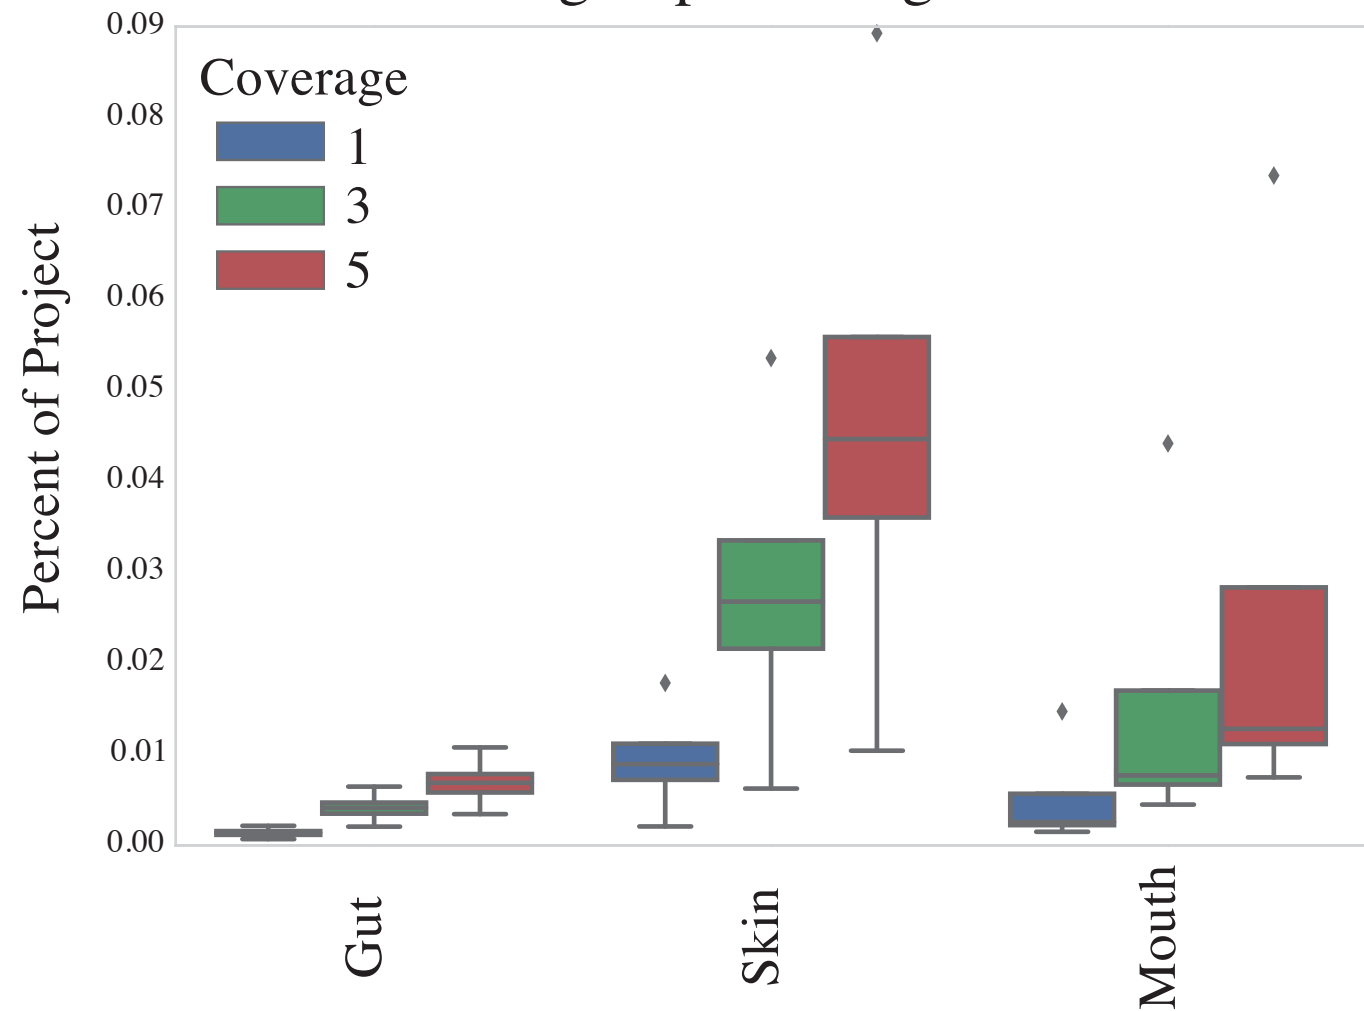**B**

### Bacterial Genome

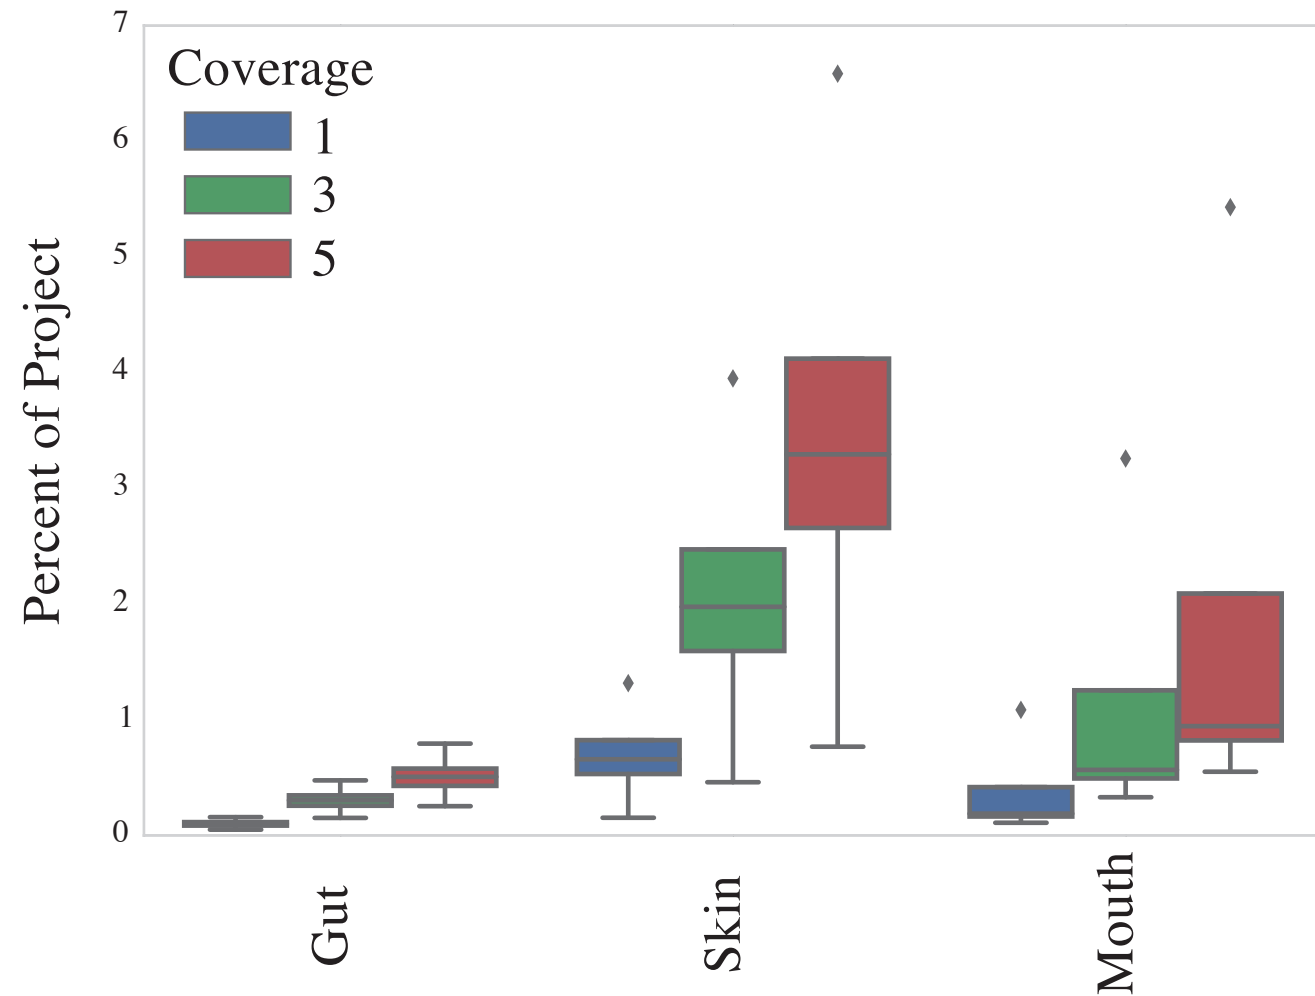

**Figure S4** Body sites have different depths of sequencing, due largely to extensive human DNA contamination. For the average size phage/plasmid (a) (44 kb) and bacterial (b) (3.3 Mbp) genome, the percentage of project reads that correspond with different coverage levels is shown for all three body sites.
